# Supplementary material for: Signatures of Long-Term Balancing Selection in Human Genomes
Source: Genome Biol Evol. 2018 Mar 15;10(3):939–55. doi: 10.1093/gbe/evy054 (PMC5952967; doi:10.1093/gbe/evy054)
Supplement: Supplementary Materials [file evy054_supp.zip]

Archive with 6 entries (6 files):
- S1_Table_GBE.xlsx
- S2_Table_GBE.xlsx
- S4_Table_GBE_revised.xlsx
- S5_Table_GBE.xlsx
- SOM_revised.pdf
- Supplementary_Material_revised.docx
