# Supplementary material for: Signatures of Long-Term Balancing Selection in Human Genomes
Source: Genome Biol Evol. 2018 Mar 15;10(3):939–55. doi: 10.1093/gbe/evy054 (PMC5952967; doi:10.1093/gbe/evy054)
Supplement: Supplementary Materials [file evy054_supp.zip › S1_Table_GBE.xlsx]

## Sheet: Legend
power is always given for false positive rate (FPR)=5%
f_eq, frquency equlibrium used in the simulations
tf, target frequency value used in the NCD equations
Tbs, time since onset of balancing selection, in millions of years
L, length of the simulated sequence, in kilobase pairs
NCD1+HKA: tf for NCD1 matches feq used in simulations
TajD: tahima's D
HKA: Hudson-Kreitman-Aguadé test
BETA: test implemented through python code provided in Siewert & Voight (2017). The optimal window size (1,000 bp) and format of the test (folded) were used.
Two other window sizes were also analyzes (2,000 and 3,000 bp). Tbs= 5 and Tbs=3 were considered.
T1 and T2: tests implemented in BALLET (DeGiorgio et al. 2014). Tests were performed for simulations with 100 IS, Tbs=5 and 3 myr, and
scores were calculated for the three feq values for African and European simulations, sample size 100.
n100, n60, n20: sample size from simulations, in number of chromosomes. For all tests, n=100 was used. For NCD1 and NCD2, other values were explored.

## Sheet: Africa_n100
		NCD2							NCD1
			Target frequency							Target frequency
Tbs (mya)		f_eq	L	0.5	0.4	0.3		Tbs	f_eq	L	0.5	0.4	0.3		TajD	HKA	NCD1+HKA			Tbs	f_eq	BETA (1kb)	BETA (2 kb)	BETA (3kb)			Tbs	f_eq	T2 (100 IS)	T1 (100 IS)
	5	0.5	3kb	0.959	0.944	0.835		5	0.5	3kb	0.929	0.911	0.393		0.938	0.783	0.911			5	0.5						5	0.5
			6kb	0.917	0.885	0.728				6kb	0.903	0.847	0.392		0.906	0.704	0.857					0.89	0.889	0.897
			12kb	0.829	0.789	0.548				12kb	0.846	0.772	0.325		0.847	0.531	0.703												0.944	0.595
		Average		0.901667	0.872667	0.703667			Average		0.892667	0.843333	0.37		0.897	0.672667	0.823667
		0.4	3kb	0.939	0.935	0.886			0.4	3kb	0.886	0.894	0.674		0.899	0.758	0.9				0.4							0.4
			6kb	0.871	0.86	0.79				6kb	0.838	0.819	0.651		0.844	0.663	0.805					0.88	0.864	0.869					0.899	0.579
			12kb	0.742	0.726	0.612				12kb	0.745	0.717	0.534		0.745	0.473	0.623
		Average		0.850667	0.840333	0.762667			Average		0.823	0.81	0.619667		0.829333	0.631333	0.776
		0.3	3kb	0.895	0.908	0.929			0.3	3kb	0.717	0.801	0.836		0.75	0.735	0.877				0.3							0.3	0.894	0.59
			6kb	0.776	0.796	0.833				6kb	0.659	0.709	0.794		0.664	0.63	0.768					0.899	0.886	0.88
			12kb	0.572	0.597	0.638				12kb	0.509	0.57	0.663		0.509	0.424	0.554
		Average		0.747667	0.767	0.8			Average		0.628333	0.693333	0.764333		0.641	0.596333	0.733
	3	0.5	3kb	0.911	0.882	0.681		3	0.5	3kb	0.855	0.797	0.236		0.868	0.606	0.83			3	0.5
			6kb	0.856	0.809	0.574				6kb	0.854	0.77	0.266		0.863	0.54	0.754					0.811	0.802	0.812
			12kb	0.727	0.666	0.41				12kb	0.768	0.678	0.232		0.768	0.413	0.753
		Average		0.831333	0.785667	0.555			Average		0.825667	0.748333	0.244667		0.833	0.519667	0.779
		0.4	3kb	0.878	0.864	0.759			0.4	3kb	0.781	0.783	0.557		0.797	0.564	0.786				0.4
			6kb	0.803	0.785	0.678				6kb	0.77	0.753	0.527		0.777	0.5	0.697					0.77	0.772	0.771
			12kb	0.659	0.621	0.5				12kb	0.654	0.629	0.441		0.654	0.358	0.516
		Average		0.78	0.756667	0.645667			Average		0.735	0.721667	0.508333		0.742667	0.474	0.666333
		0.3	3kb	0.749	0.774	0.811			0.3	3kb	0.561	0.64	0.706		0.588	0.523	0.741				0.3
			6kb	0.628	0.648	0.7				6kb	0.526	0.57	0.658		0.528	0.448	0.632					0.816	0.812	0.795
			12kb	0.425	0.456	0.509				12kb	0.388	0.443	0.536		0.389	0.301	0.427
		Average		0.600667	0.626	0.673333			Average		0.491667	0.551	0.633333		0.501667	0.424	0.6
	1	0.5	3kb	0.419	0.336	0.159		1	0.5	3kb	0.389	0.321	0.087		0.409	0.147	0.316
			6kb	0.356	0.283	0.107				6kb	0.395	0.294	0.086		0.396	0.127	0.283
			12kb	0.273	0.217	0.1				12kb	0.359	0.268	0.096		0.355	0.101	0.203
		Average		0.349333	0.278667	0.122			Average		0.381	0.294333	0.0896667		0.386667	0.125	0.267333
		0.4	3kb	0.372	0.338	0.247			0.4	3kb	0.348	0.34	0.185		0.36	0.127	0.266
			6kb	0.305	0.278	0.206				6kb	0.355	0.324	0.195		0.361	0.126	0.253
			12kb	0.252	0.232	0.156				12kb	0.304	0.274	0.174		0.305	0.103	0.196
		Average		0.309667	0.282667	0.203			Average		0.335667	0.312667	0.184667		0.342	0.118667	0.238333
		0.3	3kb	0.229	0.239	0.28			0.3	3kb	0.194	0.249	0.279		0.202	0.129	0.227
			6kb	0.19	0.203	0.233				6kb	0.21	0.232	0.277		0.209	0.115	0.204
			12kb	0.142	0.15	0.169				12kb	0.159	0.182	0.219		0.159	0.107	0.158
		Average		0.187	0.197333	0.227333			Average		0.187667	0.221	0.258333		0.19	0.117	0.196333

## Sheet: Europe_n100
		NCD2							NCD1
			Target frequency							Target frequency
Tbs (mya)		f_eq.	L	0.5	0.4	0.3			f_eq.	L	0.5	0.4	0.3		TajD	HKA	NCD1+HKA			Tbs	f_eq	BETA (1 kb)	BETA (2 kb)	BETA (3kb)			Tbs	f_eq	T2(100 IS)	T1 (100 IS)
	5	0.5	3kb	0.968	0.951	0.835		5	0.5	3kb	0.921	0.846	0.197		0.941	0.84	0.932			5	0.5						5	0.5
			6kb	0.941	0.907	0.747				6kb	0.916	0.871	0.234		0.929	0.752	0.932					0.887	0.884	0.833					0.935238	0.795
			12kb	0.849	0.8	0.573				12kb	0.847	0.767	0.201		0.849	0.594	0.763
		Average		0.919333	0.886	0.718333			Average		0.894667	0.828	0.210667		0.906333	0.728667	0.875667
		0.4	3kb	0.947948	0.943944	0.906907			0.4	3kb	0.848849	0.825826	0.595596		0.892893	0.827828	0.908909				0.4							0.4
			6kb	0.901	0.892	0.832				6kb	0.849	0.85	0.633		0.874	0.712	0.851					0.886	0.867	0.822					0.870599	0.75
			12kb	0.779	0.757	0.687				12kb	0.75	0.744	0.536		0.755	0.517	0.7
		Average		0.875983	0.864315	0.808636			Average		0.81595	0.806609	0.588199		0.840631	0.685609	0.81997
		0.3	3kb	0.836401	0.854806	0.891616			0.3	3kb	0.47137	0.568507	0.740286		0.562372	0.804704	0.561				0.3							0.3
			6kb	0.725904	0.758032	0.810241				6kb	0.496988	0.606426	0.721888		0.538153	0.680723	0.533					0.815	0.816	0.797					0.84491	0.712
			12kb	0.551	0.595	0.67				12kb	0.387	0.493	0.644		0.393	0.485	0.427
		Average		0.704435	0.735946	0.790619			Average		0.451786	0.555978	0.702058		0.497842	0.656809	0.507
	3	0.5	3kb	0.928	0.892	0.678		3	0.5	3kb	0.814	0.693	0.145		0.86	0.665	0.864			3	0.5
			6kb	0.875	0.833	0.607				6kb	0.841	0.755	0.195		0.861	0.602	0.822					0.775	0.799	0.737
			12kb	0.761	0.704	0.451				12kb	0.759	0.67	0.187		0.766	0.445	0.677
		Average		0.854667	0.809667	0.578667			Average		0.804667	0.706	0.175667		0.829	0.570667	0.787667
		0.4	3kb	0.887663	0.874624	0.794383			0.4	3kb	0.738215	0.709127	0.461384		0.787362	0.652959	0.814443				0.4
			6kb	0.828	0.809	0.723				6kb	0.782	0.765	0.517		0.807	0.579	0.748					0.816	0.793	0.739
			12kb	0.678	0.662	0.567				12kb	0.692	0.676	0.462		0.699	0.396	0.587
		Average		0.797888	0.781875	0.694794			Average		0.737405	0.716709	0.480128		0.764454	0.542653	0.716481
		0.3	3kb	0.733401	0.756895	0.794688			0.3	3kb	0.389173	0.480082	0.634321		0.458631	0.601634	0.476				0.3
			6kb	0.609438	0.64257	0.702811				6kb	0.424699	0.512048	0.631526		0.463855	0.506024	0.454					0.759	0.754	0.718
			12kb	0.433	0.473	0.558				12kb	0.332	0.402	0.548		0.336	0.329	0.354
		Average		0.591946	0.624155	0.685167			Average		0.381957	0.46471	0.604616		0.419496	0.478886	0.428
	1	0.5	3kb	0.472417	0.388164	0.161485		1	0.5	3kb	0.430291	0.304915	0.0541625		0.45336	0.165496	0.374122
			6kb	0.404	0.325	0.139				6kb	0.467	0.347	0.064		0.492	0.145	0.337
			12kb	0.337	0.264	0.12				12kb	0.43	0.306	0.058		0.426	0.108	0.262
		Average		0.404472	0.325721	0.140162			Average		0.44243	0.319305	0.0587208		0.45712	0.139499	0.324374
		0.4	3kb	0.425425	0.386386	0.286286			0.4	3kb	0.371371	0.332332	0.218218		0.396396	0.167167	0.316316
			6kb	0.362	0.33	0.26				6kb	0.398	0.398	0.249		0.43	0.147	0.308
			12kb	0.296	0.269	0.216				12kb	0.38	0.342	0.208		0.376	0.127	0.261
		Average		0.361142	0.328462	0.254095			Average		0.383124	0.357444	0.225073		0.400799	0.147056	0.295105
		0.3	3kb	0.228571	0.24898	0.286735			0.3	3kb	0.144898	0.170408	0.259184		0.15	0.165306	0.131394
			6kb	0.19	0.206	0.263				6kb	0.172	0.223	0.299		0.18	0.133	0.119
			12kb	0.151	0.161	0.22				12kb	0.14	0.164	0.256		0.141	0.116	0.1
		Average		0.189857	0.205327	0.256578			Average		0.152299	0.185803	0.271395		0.157	0.138102	0.116798

## Sheet: Asia_n100
		NCD2							NCD1
			Target frequency							Target frequency
Tbs (mya)		f_eq	L	0.5	0.4	0.3			f_eq	L	0.5	0.4	0.3		TajD	HKA	NCD1+HKA
	5	0.5	3kb	0.66566	0.686808	0.704935		5	0.5	3kb	0.448137	0.476334	0.364552		0.493454	0.835851	0.553877
			6kb	0.583584	0.604605	0.613614				6kb	0.438438	0.465465	0.378378		0.459459	0.745746	0.514514
			12kb	0.469	0.476	0.45				12kb	0.398	0.401	0.332		0.399	0.562	0.405
		Average		0.572748	0.589137	0.589516			Average		0.428192	0.4476	0.35831		0.450638	0.714532	0.491131
		0.4	3kb	0.343315	0.372192	0.429946			0.4	3kb	0.135829	0.166845	0.224599		0.166845	0.806417	0.242781
			6kb	0.262312	0.291457	0.355779				6kb	0.134673	0.166834	0.224121		0.145729	0.658292	0.21809
			12kb	0.187	0.206	0.241				12kb	0.116	0.133	0.189		0.122	0.458	0.17
		Average		0.264209	0.289883	0.342242			Average		0.128834	0.15556	0.212573		0.144858	0.640903	0.21029
		0.3	3kb	0.113466	0.134663	0.185785			0.3	3kb	0.0149626	0.0224439	0.0548628		0.0224439	0.659601	0.0935162
			6kb	0.062436	0.0706244	0.11259				6kb	0.0122825	0.0235415	0.0460594		0.013306	0.454452	0.0644831
			12kb	0.03	0.041	0.068				12kb	0.011	0.015	0.037		0.012	0.323	0.052
		Average		0.0686341	0.0820959	0.122125			Average		0.0127484	0.0203284	0.0459741		0.0159166	0.479018	0.0699998
	3	0.5	3kb	0.610664	0.626761	0.615694		3	0.5	3kb	0.39336	0.404427	0.344064		0.443662	0.671026	0.530181
			6kb	0.531531	0.544544	0.528528				6kb	0.411411	0.422422	0.374374		0.427427	0.594595	0.471471
			12kb	0.412	0.418	0.389				12kb	0.371	0.37	0.298		0.375	0.437	0.357
		Average		0.518065	0.529768	0.511074			Average		0.391924	0.39895	0.338813		0.415363	0.56754	0.452884
		0.4	3kb	0.244635	0.269313	0.331545			0.4	3kb	0.110515	0.140558	0.172747		0.129828	0.622318	0.195279
			6kb	0.188508	0.207661	0.252016				6kb	0.100806	0.128024	0.166331		0.111895	0.512097	0.165323
			12kb	0.128	0.144	0.178				12kb	0.085	0.111	0.142		0.09	0.35	0.117
		Average		0.187048	0.206992	0.253854			Average		0.0987738	0.126527	0.160359		0.110574	0.494805	0.159201
		0.3	3kb	0.0733831	0.0870647	0.125622			0.3	3kb	0.011194	0.0223881	0.0497512		0.0161692	0.503731	0.0746269
			6kb	0.0357143	0.0520408	0.072449				6kb	0.0122449	0.0173469	0.0459184		0.0132653	0.352041	0.0510204
			12kb	0.019	0.029	0.047				12kb	0.01	0.018	0.037		0.01	0.223	0.036
		Average		0.0426991	0.0560352	0.0816903			Average		0.0111463	0.019245	0.0442232		0.0131448	0.359591	0.0538824
	1	0.5	3kb	0.286869	0.273737	0.222222		1	0.5	3kb	0.245454	0.225252	0.145455		0.268687	0.178788	0.236364
			6kb	0.222222	0.212212	0.159159				6kb	0.235235	0.215215	0.167167		0.242242	0.154154	0.208208
			12kb	0.181	0.173	0.132				12kb	0.205	0.188	0.135		0.204	0.133	0.152
		Average		0.23003	0.21965	0.171127			Average		0.228563	0.209489	0.149207		0.23831	0.155314	0.198857
		0.4	3kb	0.0916844	0.098081	0.116205			0.4	3kb	0.0479744	0.0607676	0.0916844		0.0554371	0.163113	0.0810234
			6kb	0.0684105	0.0744467	0.0975855				6kb	0.0442656	0.0492958	0.083501		0.0492958	0.15493	0.0734406
			12kb	0.055	0.065	0.076				12kb	0.041	0.051	0.075		0.04	0.118	0.07
		Average		0.0716983	0.0791759	0.0965967			Average		0.0444133	0.0536878	0.0833951		0.0482443	0.145348	0.0748214
		0.3	3kb	0.027845	0.027845	0.0423729			0.3	3kb	0.0157385	0.0181598	0.027845		0.0169491	0.112591	0.027845
			6kb	0.0152439	0.0203252	0.0304878				6kb	0.00813008	0.0142276	0.0264228		0.0101626	0.0823171	0.0254065
			12kb	0.016	0.018	0.026				12kb	0.01	0.012	0.018		0.009	0.065	0.02
		Average		0.0196963	0.0220567	0.0329536			Average		0.0112895	0.0147958	0.0240893		0.0120372	0.086636	0.0244172

## Sheet: Africa_n60
		NCD2							NCD1
			Target frequency							Target frequency
Tbs (mya)		f_eq	L	0.5	0.4	0.3			f_eq	L	0.5	0.4	0.3
	5	0.5	3kb	0.978	0.969	0.852		5	0.5	3kb	0.925	0.896	0.382
			6kb	0.931	0.909	0.751				6kb	0.913	0.872	0.403
			12kb	0.832	0.785	0.561				12kb	0.821	0.757	0.319
		Average		0.913667	0.887667	0.721333			Average		0.886333	0.841667	0.368
		0.4	3kb	0.944	0.94	0.884			0.4	3kb	0.867	0.866	0.61
			6kb	0.88	0.879	0.798				6kb	0.839	0.839	0.602
			12kb	0.749	0.725	0.623				12kb	0.696	0.7	0.493
		Average		0.857667	0.848	0.768333			Average		0.800667	0.801667	0.568333
		0.3	3kb	0.867	0.875	0.903			0.3	3kb	0.668	0.738	0.802
			6kb	0.766	0.793	0.826				6kb	0.628	0.713	0.763
			12kb	0.565	0.597	0.632				12kb	0.461	0.535	0.633
		Average		0.732667	0.755	0.787			Average		0.585667	0.662	0.732667
	3	0.5	3kb	0.904	0.877	0.674		3	0.5	3kb	0.847	0.79	0.279
			6kb	0.849	0.81	0.585				6kb	0.836	0.78	0.303
			12kb	0.726	0.65	0.433				12kb	0.726	0.65	0.242
		Average		0.826333	0.779	0.564			Average		0.803	0.74	0.274667
		0.4	3kb	0.864	0.856	0.738			0.4	3kb	0.766	0.743	0.481
			6kb	0.805	0.786	0.658				6kb	0.768	0.763	0.51
			12kb	0.639	0.593	0.473				12kb	0.617	0.603	0.406
		Average		0.769333	0.745	0.623			Average		0.717	0.703	0.465667
		0.3	3kb	0.713	0.733	0.757			0.3	3kb	0.503	0.566	0.627
			6kb	0.617	0.641	0.666				6kb	0.497	0.56	0.616
			12kb	0.42	0.444	0.491				12kb	0.358	0.41	0.497
		Average		0.583333	0.606	0.638			Average		0.452667	0.512	0.58
	1	0.5	3kb	0.349	0.292	0.128		1	0.5	3kb	0.402	0.312	0.081
			6kb	0.316	0.252	0.116				6kb	0.423	0.333	0.095
			12kb	0.249	0.194	0.089				12kb	0.346	0.268	0.096
		Average		0.304667	0.246	0.111			Average		0.390333	0.304333	0.0906667
		0.4	3kb	0.344	0.313	0.218			0.4	3kb	0.369	0.341	0.198
			6kb	0.297	0.272	0.205				6kb	0.365	0.347	0.204
			12kb	0.24	0.213	0.15				12kb	0.273	0.259	0.163
		Average		0.293667	0.266	0.191			Average		0.335667	0.315667	0.188333
		0.3	3kb	0.209	0.211	0.226			0.3	3kb	0.183	0.213	0.244
			6kb	0.17	0.177	0.199				6kb	0.19	0.216	0.26
			12kb	0.142	0.137	0.15				12kb	0.15	0.17	0.204
		Average		0.173667	0.175	0.191667			Average		0.174333	0.199667	0.236

## Sheet: Europe_n60
		NCD2							NCD1
			Target frequency							Target frequency
Tbs (mya)		f_eq	L	0.5	0.4	0.3			f_eq	L	0.5	0.4	0.3
	5	0.5	3kb	0.98	0.966	0.857		5	0.5	3kb	0.926	0.871	0.231
			6kb	0.952	0.932	0.781				6kb	0.926	0.88	0.242
			12kb	0.867	0.821	0.586				12kb	0.851	0.786	0.217
		Average		0.933	0.906333	0.741333			Average		0.901	0.845667	0.23
		0.4	3kb	0.945783	0.937751	0.89759			0.4	3kb	0.803213	0.816265	0.535141
			6kb	0.895896	0.885886	0.834835				6kb	0.832833	0.81982	0.551552
			12kb	0.793	0.777	0.654				12kb	0.754	0.762	0.5
		Average		0.878226	0.866879	0.795475			Average		0.796682	0.799362	0.528897
		0.3	3kb	0.829721	0.851393	0.877193			0.3	3kb	0.45098	0.562435	0.705882
			6kb	0.725806	0.757056	0.789315				6kb	0.477823	0.549395	0.667339
			12kb	0.54	0.777	0.623				12kb	0.404	0.48	0.592
		Average		0.698509	0.79515	0.763169			Average		0.444268	0.53061	0.655074
	3	0.5	3kb	0.916917	0.878879	0.67968		3	0.5	3kb	0.820821	0.731732	0.156156
			6kb	0.877	0.837	0.585				6kb	0.864	0.771	0.173
			12kb	0.763	0.693	0.44				12kb	0.787	0.692	0.172
		Average		0.852306	0.80296	0.568227			Average		0.82394	0.731577	0.167052
		0.4	3kb	0.87976	0.871744	0.789579			0.4	3kb	0.701403	0.709419	0.481964
			6kb	0.846	0.832	0.75				6kb	0.758	0.759	0.49
			12kb	0.685	0.67	0.562				12kb	0.686	0.673	0.454
		Average		0.803587	0.791248	0.700526			Average		0.715134	0.713806	0.475321
		0.3	3kb	0.672917	0.708333	0.758333			0.3	3kb	0.375	0.461458	0.590625
			6kb	0.593718	0.613982	0.666667				6kb	0.389058	0.469098	0.577508
			12kb	0.432	0.466	0.519				12kb	0.329	0.415	0.504
		Average		0.566212	0.596105	0.648			Average		0.364353	0.448519	0.557378
	1	0.5	3kb	0.413413	0.352352	0.15015		1	0.5	3kb	0.45045	0.363363	0.0860861
			6kb	0.405	0.328	0.146				6kb	0.519	0.387	0.087
			12kb	0.323	0.262	0.12				12kb	0.449	0.367	0.083
		Average		0.380471	0.314117	0.138717			Average		0.472817	0.372454	0.085362
		0.4	3kb	0.361982	0.349848	0.252781			0.4	3kb	0.361982	0.340748	0.252781
			6kb	0.334669	0.302605	0.236473				6kb	0.433868	0.38978	0.237475
			12kb	0.29	0.269	0.187				12kb	0.354	0.336	0.205
		Average		0.328884	0.307151	0.225418			Average		0.383283	0.355509	0.231752
		0.3	3kb	0.187368	0.198947	0.252632			0.3	3kb	0.128421	0.185263	0.287368
			6kb	0.167339	0.179435	0.220766				6kb	0.166331	0.1875	0.279234
			12kb	0.13013	0.148148	0.18018				12kb	0.141141	0.179179	0.24024
		Average		0.161612	0.17551	0.217859			Average		0.145298	0.183981	0.268948

## Sheet: Asia_n60
		NCD2							NCD1
			Target frequency							Target frequency
Tbs (mya)		f_eq	L	0.5	0.4	0.3			f_eq	L	0.5	0.4	0.3
	5	0.5	3kb	0.711499	0.727926	0.747433		5	0.5	3kb	0.449692	0.469199	0.357289
			6kb	0.632161	0.657286	0.665327				6kb	0.439196	0.468342	0.377889
			12kb	0.513513	0.526527	0.506506				12kb	0.402402	0.427427	0.356356
		Average		0.619058	0.637246	0.639755			Average		0.43043	0.454989	0.363845
		0.4	3kb	0.335656	0.370499	0.42741			0.4	3kb	0.109175	0.138211	0.178862
			6kb	0.264368	0.286311	0.344828				6kb	0.109718	0.128527	0.170324
			12kb	0.169	0.192	0.227				12kb	0.087	0.102	0.16
		Average		0.256341	0.282937	0.333079			Average		0.101964	0.122913	0.169729
		0.3	3kb	0.143518	0.160494	0.194444			0.3	3kb	0.0185185	0.029321	0.0617284
			6kb	0.0793651	0.0929705	0.122449				6kb	0.0181406	0.0272109	0.0464853
			12kb	0.0371113	0.0541625	0.0702106				12kb	0.0170512	0.0250752	0.0411234
		Average		0.086665	0.102542	0.129035			Average		0.0179034	0.0272024	0.049779
	3	0.5	3kb	0.594262	0.61168	0.602459		3	0.5	3kb	0.357582	0.363729	0.294057
			6kb	0.559356	0.566398	0.555332				6kb	0.397384	0.412475	0.311871
			12kb	0.422	0.438	0.414				12kb	0.352	0.364	0.294
		Average		0.525206	0.538693	0.52393			Average		0.368989	0.380068	0.299976
		0.4	3kb	0.263097	0.289872	0.351572			0.4	3kb	0.0814901	0.110594	0.178114
			6kb	0.215321	0.242236	0.297101				6kb	0.0942029	0.109731	0.160456
			12kb	0.142142	0.165165	0.206206				12kb	0.0820821	0.107107	0.159159
		Average		0.206853	0.232424	0.28496			Average		0.085925	0.109144	0.16591
		0.3	3kb	0.0811232	0.101404	0.131045			0.3	3kb	0.0140406	0.0202808	0.0436817
			6kb	0.0476191	0.0612245	0.0873016				6kb	0.0113379	0.0124717	0.0306122
			12kb	0.0251509	0.0301811	0.0442656				12kb	0.0100604	0.0110664	0.0331992
		Average		0.0512977	0.0642699	0.0875375			Average		0.0118129	0.0146063	0.0358311
	1	0.5	3kb	0.217436	0.201026	0.178461		1	0.5	3kb	0.203077	0.188718	0.140513
			6kb	0.225904	0.198795	0.186747				6kb	0.228916	0.213855	0.154618
			12kb	0.158	0.161	0.133				12kb	0.22	0.201	0.163
		Average		0.200446	0.18694	0.16607			Average		0.217331	0.201191	0.15271
		0.4	3kb	0.0928899	0.100917	0.105505			0.4	3kb	0.059633	0.0699541	0.0940367
			6kb	0.0857438	0.0857438	0.0960744				6kb	0.0609504	0.0692149	0.0909091
			12kb	0.06	0.071	0.079				12kb	0.043	0.057	0.082
		Average		0.0795446	0.0858871	0.0935263			Average		0.0545278	0.0653897	0.0889819
		0.3	3kb	0.0232221	0.0246734	0.0290276			0.3	3kb	0.0130624	0.0145138	0.0275762
			6kb	0.0219058	0.0208105	0.0219058				6kb	0.0131435	0.0175246	0.0219058
			12kb	0.0150451	0.0170512	0.0160481				12kb	0.0160481	0.0190572	0.0280843
		Average		0.0200577	0.020845	0.0223272			Average		0.0140847	0.0170319	0.0258554

## Sheet: Africa_n20
		NCD2							NCD1
			Target frequency							Target frequency
Tbs (mya)		f_eq	L	0.5	0.4	0.3			f_eq	L	0.5	0.4	0.3
	5	0.5	3kb	0.949	0.945	0.872		5	0.5	3kb	0.802	0.77	0.345
			6kb	0.907	0.899	0.769				6kb	0.801	0.754	0.367
			12kb	0.81	0.776	0.608				12kb	0.738	0.699	0.334
		Average		0.888667	0.873333	0.749667			Average		0.780333	0.741	0.348667
		0.4	3kb	0.924	0.925	0.88			0.4	3kb	0.71	0.718	0.463
			6kb	0.858	0.858	0.78				6kb	0.703	0.71	0.448
			12kb	0.731	0.704	0.601				12kb	0.646	0.634	0.379
		Average		0.837667	0.829	0.753667			Average		0.686333	0.687333	0.43
		0.3	3kb	0.812625	0.849699	0.863727			0.3	3kb	0.447896	0.503006	0.536072
			6kb	0.733	0.756	0.758				6kb	0.443	0.487	0.535
			12kb	0.56	0.575	0.592				12kb	0.391	0.424	0.467
		Average		0.701875	0.7269	0.737909			Average		0.427299	0.471335	0.512691
	3	0.5	3kb	0.866	0.859	0.718		3	0.5	3kb	0.719	0.658	0.271
			6kb	0.846	0.828	0.656				6kb	0.737	0.678	0.297
			12kb	0.722	0.675	0.511				12kb	0.67	0.608	0.269
		Average		0.811333	0.787333	0.628333			Average		0.708667	0.648	0.279
		0.4	3kb	0.819	0.832	0.725			0.4	3kb	0.636	0.614	0.35
			6kb	0.777	0.771	0.646				6kb	0.642	0.608	0.379
			12kb	0.629	0.598	0.482				12kb	0.565	0.539	0.342
		Average		0.741667	0.733667	0.617667			Average		0.614333	0.587	0.357
		0.3	3kb	0.641	0.67	0.702			0.3	3kb	0.336	0.376	0.416
			6kb	0.578	0.604	0.611				6kb	0.367	0.399	0.426
			12kb	0.395	0.409	0.431				12kb	0.326	0.348	0.369
		Average		0.538	0.561	0.581333			Average		0.343	0.374333	0.403667
	1	0.5	3kb	0.334004	0.300805	0.206237		1	0.5	3kb	0.305835	0.263582	0.110664
			6kb	0.338	0.304	0.183				6kb	0.339	0.296	0.131
			12kb	0.308	0.264	0.159				12kb	0.334	0.28	0.138
		Average		0.326668	0.289602	0.182746			Average		0.326278	0.279861	0.126555
		0.4	3kb	0.275377	0.264322	0.21005			0.4	3kb	0.274372	0.274372	0.156784
			6kb	0.279	0.261	0.18				6kb	0.32	0.272	0.168
			12kb	0.232	0.205	0.141				12kb	0.285	0.253	0.135
		Average		0.262126	0.243441	0.177017			Average		0.293124	0.266457	0.153261
		0.3	3kb	0.174395	0.188508	0.203629			0.3	3kb	0.172379	0.184476	0.1875
			6kb	0.189	0.186	0.168				6kb	0.185	0.187	0.198
			12kb	0.142	0.13	0.128				12kb	0.169	0.175	0.189
		Average		0.168465	0.168169	0.166543			Average		0.17546	0.182159	0.1915

## Sheet: Europe_n20
		NCD2							NCD1
			Target frequency							Target frequency
Tbs (mya)		f_eq	L	0.5	0.4	0.3			f_eq	L	0.5	0.4	0.3
	5	0.5	3kb	0.938939	0.936937	0.841842		5	0.5	3kb	0.673674	0.624625	0.222222
			6kb	0.918919	0.906907	0.812813				6kb	0.710711	0.683684	0.277277
			12kb	0.848	0.815	0.678				12kb	0.709	0.679	0.282
		Average		0.901953	0.886281	0.777552			Average		0.697795	0.662436	0.2605
		0.4	3kb	0.909366	0.915408	0.879154			0.4	3kb	0.558912	0.603223	0.356496
			6kb	0.883182	0.891239	0.851964				6kb	0.600201	0.638469	0.414904
			12kb	0.781	0.764	0.711				12kb	0.585	0.612	0.405
		Average		0.857849	0.856882	0.814039			Average		0.581371	0.617897	0.392133
		0.3	3kb	0.758219	0.792153	0.840933			0.3	3kb	0.272534	0.342524	0.40509
			6kb	0.713542	0.75	0.779167				6kb	0.307292	0.389583	0.475
			12kb	0.561173	0.580384	0.641052				12kb	0.302326	0.352882	0.457027
		Average		0.677644	0.707512	0.753717			Average		0.294051	0.361663	0.445706
	3	0.5	3kb	0.857858	0.853854	0.715716		3	0.5	3kb	0.591592	0.526527	0.204204
			6kb	0.868	0.852	0.735				6kb	0.646	0.604	0.26
			12kb	0.756	0.732	0.593				12kb	0.643	0.586	0.276
		Average		0.827286	0.812618	0.681239			Average		0.626864	0.572176	0.246735
		0.4	3kb	0.814443	0.81344	0.734203			0.4	3kb	0.485456	0.513541	0.297894
			6kb	0.816633	0.822645	0.728457				6kb	0.536072	0.554108	0.353707
			12kb	0.707708	0.690691	0.5996				12kb	0.512513	0.533534	0.367367
		Average		0.779595	0.775592	0.68742			Average		0.511347	0.533727	0.339656
		0.3	3kb	0.602139	0.639572	0.678075			0.3	3kb	0.252406	0.301604	0.365775
			6kb	0.565859	0.606955	0.659642				6kb	0.273973	0.348788	0.413066
			12kb	0.451777	0.460914	0.502538				12kb	0.261929	0.327919	0.395939
		Average		0.539925	0.569147	0.613418			Average		0.262769	0.326104	0.391594
	1	0.5	3kb	0.339193	0.310238	0.168563		1	0.5	3kb	0.334023	0.29059	0.116856
			6kb	0.409409	0.359359	0.252252				6kb	0.356356	0.308308	0.138138
			12kb	0.369	0.324	0.238				12kb	0.382	0.315	0.143
		Average		0.372534	0.331199	0.219605			Average		0.35746	0.304633	0.132665
		0.4	3kb	0.266458	0.256008	0.211076			0.4	3kb	0.256008	0.246604	0.172414
			6kb	0.314573	0.312563	0.265327				6kb	0.283417	0.275377	0.198995
			12kb	0.271	0.247	0.229				12kb	0.277	0.267	0.214
		Average		0.28401	0.271857	0.235134			Average		0.272142	0.262994	0.195136
		0.3	3kb	0.161074	0.17226	0.195749			0.3	3kb	0.110738	0.138702	0.183445
			6kb	0.200624	0.212058	0.232848				6kb	0.117464	0.161123	0.211019
			12kb	0.160282	0.16129	0.206653				12kb	0.136089	0.15121	0.226815
		Average		0.173993	0.181869	0.21175			Average		0.12143	0.150345	0.207093

## Sheet: Asia_n20
		NCD2							NCD1
			Target frequency							Target frequency
Tbs (mya)		f_eq	L	0.5	0.4	0.3			f_eq	L	0.5	0.4	0.3
	5	0.5	3kb	0.68022	0.705495	0.73956		5	0.5	3kb	0.317582	0.335165	0.179121
			6kb	0.657696	0.685684	0.685684				6kb	0.345533	0.355221	0.224973
			12kb	0.519467	0.534836	0.517418				12kb	0.335041	0.354508	0.257172
		Average		0.619128	0.642005	0.647554			Average		0.332719	0.348298	0.220422
		0.4	3kb	0.442573	0.477795	0.565084			0.4	3kb	0.0888208	0.119449	0.148545
			6kb	0.370166	0.421271	0.497238				6kb	0.089779	0.125691	0.176796
			12kb	0.21229	0.24581	0.296089				12kb	0.0893855	0.110615	0.148603
		Average		0.341676	0.381625	0.452804			Average		0.0893284	0.118585	0.157981
		0.3	3kb	0.22252	0.276139	0.348525			0.3	3kb	0.0134048	0.0241287	0.0884719
			6kb	0.151277	0.188605	0.24558				6kb	0.0176817	0.021611	0.0746562
			12kb	0.0651387	0.0711701	0.0952955				12kb	0.0144753	0.0253317	0.053076
		Average		0.146312	0.178638	0.2298			Average		0.0151873	0.0236905	0.072068
	3	0.5	3kb	0.567873	0.591629	0.61086		3	0.5	3kb	0.264706	0.266968	0.182127
			6kb	0.554203	0.594027	0.606195				6kb	0.285398	0.308628	0.216814
			12kb	0.439628	0.459236	0.438597				12kb	0.277606	0.294118	0.213622
		Average		0.520568	0.548297	0.551884			Average		0.275903	0.289905	0.204188
		0.4	3kb	0.317337	0.346749	0.425697			0.4	3kb	0.100619	0.106811	0.119195
			6kb	0.315938	0.349788	0.406206				6kb	0.102962	0.121298	0.145275
			12kb	0.185714	0.198901	0.223077				12kb	0.0835165	0.0956044	0.114286
		Average		0.272997	0.29848	0.35166			Average		0.0956992	0.107904	0.126252
		0.3	3kb	0.138667	0.168	0.248			0.3	3kb	0.0266667	0.032	0.0533333
			6kb	0.125	0.151639	0.186475				6kb	0.0307377	0.0368853	0.0491803
			12kb	0.0526316	0.0645933	0.0861244				12kb	0.0203349	0.0203349	0.0382775
		Average		0.105433	0.128078	0.173533			Average		0.0259131	0.0297401	0.0469304
	1	0.5	3kb	0.195376	0.186127	0.202312		1	0.5	3kb	0.17341	0.152601	0.0763006
			6kb	0.264642	0.270065	0.227766				6kb	0.191974	0.170282	0.117137
			12kb	0.209397	0.21144	0.18999				12kb	0.194076	0.18284	0.131767
		Average		0.223138	0.222544	0.206689			Average		0.186487	0.168574	0.108401
		0.4	3kb	0.081448	0.0904977	0.104072			0.4	3kb	0.0452489	0.0482655	0.0693816
			6kb	0.0952381	0.102757	0.110276				6kb	0.0463659	0.0488722	0.0814536
			12kb	0.0779082	0.0864461	0.0896478				12kb	0.0448239	0.0458911	0.0736393
		Average		0.0848648	0.0932336	0.101332			Average		0.0454796	0.0476763	0.0748248
		0.3	3kb	0.0301075	0.0430108	0.0580645			0.3	3kb	0.0365591	0.0365591	0.0408602
			6kb	0.0392749	0.0543807	0.0785499				6kb	0.0347432	0.0347432	0.0422961
			12kb	0.041387	0.0447427	0.0514541				12kb	0.0324385	0.033557	0.0436242
		Average		0.0369232	0.047378	0.0626895			Average		0.0345803	0.0349531	0.0422601
