# Supplementary material for: Signatures of Long-Term Balancing Selection in Human Genomes
Source: Genome Biol Evol. 2018 Mar 15;10(3):939–55. doi: 10.1093/gbe/evy054 (PMC5952967; doi:10.1093/gbe/evy054)
Supplement: Supplementary Materials [file evy054_supp.zip › S2_Table_GBE.xlsx]

## Sheet: Sheet1
Enrichment analyses
The first 16 sheets correspond to GO (Gene Ontology) analyses. Each population (LWK, YRI, GBR, TSI) has 4 sets: significant, and outlie, with and without HLA genes
The remaining 16 sheets refer to tissue-specific expression analyses. Each population (LWK, YRI, GBR, TSI) has 4 sets: significant, and outlie, with and without HLA genes

## Sheet: YRI_signif
		Population	tf	FDR	Category description	Genes
		YRI	0.5	0.0013400000	integral_to_membrane	SLCO1B3,SLC39A11,JAG1,GLIPR1L2,RAMP3,FAT2,ATP2B4,SLC2A9,SV2C,SLC26A7,ZPLD1,SLCO1B7,PTPRK,EMP2,PTPRQ,GRID2,PTPRT,PCSK5,MS4A12,TMC5,TMC2,SLC2A5,SLC2A8,SLC15A2,PGBD5,PKHD1,EMR2,EMR1,LGR5,EVC2,SLC24A4,JPH2,MYOF,CACNA1A,MINOS1,EGFR,SLC30A10,CNTNAP2,DSC1,CNTNAP4,CNTNAP5,ABCG2,ODF4,YIPF7,LHFPL2,BTNL2,HLA-DPB1,SLC25A21,SLC25A25,ACBD5,DSG1,FAM155A,LRP1B,PDE3A,ASIC2,SLC25A37,MS4A6E,GABRB3,GSG1L,ABCB11,TMEM…
				0.0013400000	ER_to_Golgi_transport_vesicle_membrane	HLA-DPB1,HLA-DPA1,HLA-DRB1,HLA-DRB5,HLA-F,HLA-G,HLA-B,HLA-C,HLA-DQB2,HLA-DQA2,HLA-DQA1
				0.0013400000	antigen_processing_and_presentation	HLA-DPB1,HLA-DPA1,HLA-DRB1,HLA-DRB5,HLA-F,HLA-G,HLA-B,HLA-C,HLA-DOB,HLA-DQB1,HLA-DQB2,HLA-DQA2,HLA-DQA1
				0.0013400000	integral_to_lumenal_side_of_endoplasmic_reticulum_membrane	HLA-DPB1,HLA-DPA1,HLA-DRB1,HLA-DRB5,HLA-F,HLA-G,HLA-B,HLA-C,HLA-DQB2,HLA-DQA2,HLA-DQA1
				0.0013400000	lysosomal_membrane	SLC2A8,STX8,HLA-DPB1,SLC17A5,HLA-DPA1,MARCH1,HLA-DRB1,HLA-DRB5,AHNAK,WDR11,TMEM106B,PLD1,HLA-DOB,CUBN,RPTOR,TLDC1,MYO7A,OCA2,ENPP1,DAB2,HLA-DQB2,GPLD1,HLA-DQA2,HLA-DQA1,ATP6V0A4,TMEM192,GPR137B,DRAM1,SCARB1,SCARB2
				0.0013400000	keratin_filament	KRTAP10-7,KRT14,KRT6A,KRT84,KRT83,KRTAP5-5,KRTAP3-2
				0.0013400000	trans_Golgi_network_membrane	LGR5,HLA-DPB1,HLA-DPA1,MARCH1,HLA-DRB1,HLA-DRB5,CALN1,HLA-DQB2,HLA-DQA2,HLA-DQA1,KIF13A
				0.0013400000	antigen_processing_and_presentation_of_exogenous_peptide_antigen_via_MHC_class_I_TAP_independent	HLA-F,HLA-G,HLA-B,HLA-C
				0.0013400000	interferon_gamma_mediated_signaling_pathway	HLA-DPB1,HLA-DPA1,HLA-DRB1,HLA-DRB5,IRF1,HLA-F,HLA-G,HLA-B,HLA-C,HLA-DQB2,HLA-DQA2,HLA-DQA1
				0.0013400000	peptide_antigen_binding	HLA-DRB1,HLA-F,HLA-G,HLA-B,HLA-C,TAP2
				0.0013400000	clathrin_coated_endocytic_vesicle_membrane	HLA-DPB1,HLA-DPA1,HLA-DRB1,HLA-DRB5,HLA-DQB2,HLA-DQA2,HLA-DQA1
				0.0013400000	MHC_class_II_protein_complex	HLA-DPB1,HLA-DPA1,HLA-DRB1,HLA-DRB5,HLA-DOB,HLA-DQB1,HLA-DQB2,HLA-DQA2,HLA-DQA1
				0.0013400000	MHC_class_I_protein_complex	HLA-F,HLA-G,HLA-B,HLA-C
				0.0013400000	MHC_class_II_receptor_activity	HLA-DPA1,HLA-DRB1,HLA-DOB,HLA-DQB2,HLA-DQA2,HLA-DQA1
				0.0013400000	antigen_processing_and_presentation_of_peptide_or_polysaccharide_antigen_via_MHC_class_II	HLA-DPB1,HLA-DPA1,HLA-DQB1,HLA-DQB2,HLA-DQA1
				0.0025550000	positive_regulation_of_T_cell_mediated_cytotoxicity	HLA-F,HLA-G,HLA-B,HLA-C,P2RX7,TAP2
				0.0048470588	transport_vesicle_membrane	RAB11FIP5,HLA-DPB1,CPE,HLA-DPA1,HLA-DRB1,HLA-DRB5,HLA-DQB2,HLA-DQA2,HLA-DQA1
				0.0057216667	endocytic_vesicle_membrane	GRIA1,HLA-DPB1,HLA-DPA1,CACNG2,HLA-DRB1,HLA-DRB5,MSR1,COLEC12,HLA-DQB2,HLA-DQA2,HLA-DQA1,CD36,SCARB1
				0.0124863158	heterotypic_cell_cell_adhesion	PERP,GLDN,PARVA,NRCAM,NFASC
				0.0129520000	antigen_processing_and_presentation_of_endogenous_peptide_antigen_via_MHC_class_I	TAP2,ERAP1,ERAP2
				0.0191533333	immune_response	PXDN,HLA-DPB1,CXCL11,HLA-DPA1,CMKLR1,MARCH1,HLA-DRB1,HLA-DRB5,RGS1,CNR2,HLA-F,HLA-G,HLA-B,HLA-C,HLA-DOB,IL1R1,COLEC12,ENPP1,HLA-DQB1,HLA-DQB2,TRIM22,HLA-DQA2,HLA-DQA1,TLR10,CD96
				0.0324718182	negative_regulation_of_glucose_import	PID1,GRB10,OSTN,ENPP1,PRKCA
				0.0395217391	membrane	SLCO1B3,SLC39A11,JAG1,FAT2,ATP2B4,SLC2A9,SV2C,SLCO1B7,PTPRK,GRID2,PTPRT,SLC2A5,SLC2A8,KCNQ5,SLC15A2,EMR2,EMR1,JPH2,KCNS3,GRIA1,CACNA1A,EGFR,CNTNAP2,DSC1,APBB2,KCNV2,ABCG2,NR3C1,YIPF7,NCF2,PDE4D,PLA2G4C,HLA-DPB1,DSCAM,DSG1,KSR2,LRP1B,ASIC2,GABRB3,ABCB11,LOXL2,SLC17A5,ABCC2,LAMA2,ABCC4,GABRG3,SLC28A1,HLA-DPA1,FLT3,ABCD4,HLA-DRB1,LPHN2,LPHN3,LAMC2,HLA-DRB5,ERBB4,DOCK2,DOCK1,RECK,SNAP25,GOSR2,MSR1,AN…
		YRI	0.4	0.0012312500	positive_regulation_of_T_cell_mediated_cytotoxicity	HLA-F,HLA-G,HLA-B,HLA-C,P2RX7,TAP2
				0.0012312500	ER_to_Golgi_transport_vesicle_membrane	HLA-DPB1,HLA-DPA1,HLA-DRB1,HLA-DRB5,HLA-F,HLA-G,HLA-B,HLA-C,HLA-DRA,HLA-DQB2,HLA-DQA2,HLA-DQA1
				0.0012312500	antigen_processing_and_presentation	HLA-DPB1,HLA-DPA1,HLA-DRB1,HLA-DRB5,HLA-F,HLA-G,HLA-B,HLA-C,HLA-DOB,HLA-DRA,HLA-DQB1,HLA-DQB2,HLA-DQA2,HLA-DQA1
				0.0012312500	integral_to_lumenal_side_of_endoplasmic_reticulum_membrane	HLA-DPB1,HLA-DPA1,HLA-DRB1,HLA-DRB5,HLA-F,HLA-G,HLA-B,HLA-C,HLA-DRA,HLA-DQB2,HLA-DQA2,HLA-DQA1
				0.0012312500	keratin_filament	KRTAP10-7,KRT14,KRT6A,KRT84,KRT83,KRTAP5-5,KRTAP5-9,KRTAP3-2
				0.0012312500	trans_Golgi_network_membrane	LGR5,HLA-DPB1,HLA-DPA1,MARCH1,HLA-DRB1,HLA-DRB5,CALN1,HLA-DRA,HLA-DQB2,HLA-DQA2,HLA-DQA1,KIF13A
				0.0012312500	antigen_processing_and_presentation_of_exogenous_peptide_antigen_via_MHC_class_I_TAP_independent	HLA-F,HLA-G,HLA-B,HLA-C
				0.0012312500	interferon_gamma_mediated_signaling_pathway	HLA-DPB1,HLA-DPA1,HLA-DRB1,HLA-DRB5,HLA-F,HLA-G,HLA-B,HLA-C,HLA-DRA,HLA-DQB2,HLA-DQA2,HLA-DQA1
				0.0012312500	immune_response	PXDN,HLA-DPB1,CXCL11,HLA-DPA1,MARCH1,HLA-DRB1,HLA-DRB5,IL1RL1,RGS1,IL18R1,CNR2,HLA-F,HLA-G,HLA-B,HLA-C,HLA-DOB,IL1R1,COLEC12,HLA-DRA,LY75,ENPP1,HLA-DQB1,HLA-DQB2,TRIM22,HLA-DQA2,HLA-DQA1,TLR10,CD96
				0.0012312500	peptide_antigen_binding	HLA-DRB1,HLA-F,HLA-G,HLA-B,HLA-C,TAP2
				0.0012312500	clathrin_coated_endocytic_vesicle_membrane	HLA-DPB1,HLA-DPA1,HLA-DRB1,HLA-DRB5,HLA-DRA,HLA-DQB2,HLA-DQA2,HLA-DQA1
				0.0012312500	transport_vesicle_membrane	RAB11FIP5,HLA-DPB1,CPE,HLA-DPA1,HLA-DRB1,HLA-DRB5,PTPRN2,HLA-DRA,HLA-DQB2,HLA-DQA2,HLA-DQA1
				0.0012312500	MHC_class_II_protein_complex	HLA-DPB1,HLA-DPA1,HLA-DRB1,HLA-DRB5,HLA-DOB,HLA-DRA,HLA-DQB1,HLA-DQB2,HLA-DQA2,HLA-DQA1
				0.0012312500	MHC_class_I_protein_complex	HLA-F,HLA-G,HLA-B,HLA-C
				0.0012312500	MHC_class_II_receptor_activity	HLA-DPA1,HLA-DRB1,HLA-DOB,HLA-DRA,HLA-DQB2,HLA-DQA2,HLA-DQA1
				0.0012312500	antigen_processing_and_presentation_of_peptide_or_polysaccharide_antigen_via_MHC_class_II	HLA-DPB1,HLA-DPA1,HLA-DRA,HLA-DQB1,HLA-DQB2,HLA-DQA1
				0.0035641176	endocytic_vesicle_membrane	GRIA1,HLA-DPB1,HLA-DPA1,CACNG2,HLA-DRB1,HLA-DRB5,MSR1,COLEC12,HLA-DRA,HLA-DQB2,HLA-DQA2,HLA-DQA1,CD36,SCARB1
				0.0119722222	lysosomal_membrane	SLC2A8,STX8,HLA-DPB1,SLC17A5,HLA-DPA1,MARCH1,HLA-DRB1,HLA-DRB5,WDR11,TMEM106B,PLD1,HLA-DOB,CUBN,RPTOR,TLDC1,MYO7A,HLA-DRA,ENPP1,DAB2,HLA-DQB2,GPLD1,HLA-DQA2,HLA-DQA1,ATP6V0A4,TMEM192,GPR137B,DRAM1,SCARB1
				0.0197305263	heterotypic_cell_cell_adhesion	PERP,GLDN,PARVA,NRCAM,NFASC
				0.0259920000	antigen_processing_and_presentation_of_endogenous_peptide_antigen_via_MHC_class_I	TAP2,ERAP1,ERAP2
				0.0319995238	integral_to_membrane	SLCO1B3,SLC39A11,GLIPR1L2,RAMP3,FAT2,ATP2B4,SLC2A9,SV2C,SLC26A7,ZPLD1,SLCO1B7,EMP2,PTPRK,PTPRQ,GRID2,LPPR1,PTPRT,PCSK5,MS4A12,TMC5,TMC2,SLC2A8,NINJ2,SLC15A2,PGBD5,PKHD1,EMR2,EMR1,LGR5,EVC2,SLC24A4,JPH2,MYOF,CACNA1A,CACNA1C,MINOS1,EGFR,SLC30A10,CNTNAP2,DSC1,CNTNAP4,CNTNAP5,ODF4,SLCO5A1,YIPF7,LHFPL2,BTNL2,HLA-DPB1,SLC25A21,ACBD5,DSG1,FAM155A,LRP1B,PDE3A,ASIC2,SLC25A37,MS4A6E,GABRB3,ABCB11,TMEM232,S…
				0.0459881818	extracellular_region	LIPC,ITIH5,TEK,CELA3B,IGFBP7,WFDC8,RNASE11,WFDC1,SPP2,EPDR1,FSTL4,TMPRSS11E,TMPRSS11F,NRG3,ANGPT2,DSCAM,FGF14,NXPH1,CXCL11,LAMA2,LAMA1,CPE,PRB2,HHLA1,PAMR1,VWF,LAMC2,LAMC1,ERBB4,NTN1,REG4,EYS,IL1RL1,THSD7A,PCDHA10,FCER2,NMS,COL4A2,COL4A4,COL4A3,PDGFD,PDGFC,PDGFB,PCDH15,PRLR,HGF,COL24A1,MMP2,FBN2,OVCH1,CES5A,HS3ST4,PLEK,ST6GAL1,TSPEAR,PGLYRP4,MINOS1-NBL1,IL1R1,FNDC1,ITLN1,GLT1D1,ADAMTS3,AOAH,CNTN4…
		YRI	0.3	0.0015307692	ER_to_Golgi_transport_vesicle_membrane	HLA-DPB1,HLA-DPA1,HLA-DRB1,HLA-DRB5,HLA-F,HLA-G,HLA-B,HLA-C,HLA-DRA,HLA-DQB2,HLA-DQA2,HLA-DQA1
				0.0015307692	antigen_processing_and_presentation	HLA-DPB1,HLA-DPA1,HLA-DRB1,HLA-DRB5,HLA-F,HLA-G,HLA-B,HLA-C,HLA-DOB,HLA-DRA,HLA-DQB1,HLA-DQB2,HLA-DQA2,HLA-DQA1
				0.0015307692	integral_to_lumenal_side_of_endoplasmic_reticulum_membrane	HLA-DPB1,HLA-DPA1,HLA-DRB1,HLA-DRB5,HLA-F,HLA-G,HLA-B,HLA-C,HLA-DRA,HLA-DQB2,HLA-DQA2,HLA-DQA1
				0.0015307692	trans_Golgi_network_membrane	LGR5,HLA-DPB1,HLA-DPA1,HLA-DRB1,HLA-DRB5,CALN1,HLA-DRA,HLA-DQB2,HLA-DQA2,HLA-DQA1,KIF13A,TMEM165
				0.0015307692	extracellular_region	LIPC,ITIH5,ISM1,CELA3B,IGFBP7,WFDC8,RNASE11,WFDC1,SPP2,CPA5,ADAM28,TMPRSS11E,TMPRSS11F,CPA3,NRG3,ANGPT2,DSCAM,HSD17B11,FGF14,NXPH1,HPSE,UTS2B,CXCL11,LAMA2,LAMA1,CPE,PRB2,PAMR1,VWF,LAMC2,LAMC1,ERBB4,NTN1,REG4,EYS,IL1RL1,SCGB3A2,THSD7A,PCDHA10,FCER2,NMS,COL4A2,COL4A4,COL4A3,PDGFC,NRP1,PDGFB,NOTCH4,PCDH15,TREML4,FAS,CLCA2,NPNT,PRLR,F13A1,COL24A1,MMP2,SMR3A,FBN2,OVCH1,CES5A,HS3ST4,PLEK,ST6GAL1,TSPEAR…
				0.0015307692	immune_response	PXDN,HLA-DPB1,CXCL11,HLA-DPA1,HLA-DRB1,HLA-DRB5,IL1RL1,FAS,RGS1,IL18R1,CNR2,HLA-F,HLA-G,HLA-B,HLA-C,HLA-DOB,CHIA,COLEC12,VPREB1,HLA-DRA,IL10RB,LY75,ENPP1,HLA-DQB1,HLA-DQB2,TRIM22,OPRK1,HLA-DQA2,HLA-DQA1,SERPINB9,CD96
				0.0015307692	peptide_antigen_binding	HLA-DRB1,HLA-F,HLA-G,HLA-B,HLA-C,TAP2,SLC7A5
				0.0015307692	clathrin_coated_endocytic_vesicle_membrane	HLA-DPB1,HLA-DPA1,HLA-DRB1,HLA-DRB5,HLA-DRA,HLA-DQB2,HLA-DQA2,HLA-DQA1
				0.0015307692	transport_vesicle_membrane	RAB11FIP5,HLA-DPB1,CPE,HLA-DPA1,HLA-DRB1,HLA-DRB5,PTPRN2,SPRED2,HLA-DRA,HLA-DQB2,HLA-DQA2,HLA-DQA1
				0.0015307692	MHC_class_II_protein_complex	HLA-DPB1,HLA-DPA1,HLA-DRB1,HLA-DRB5,HLA-DOB,HLA-DRA,HLA-DQB1,HLA-DQB2,HLA-DQA2,HLA-DQA1
				0.0015307692	MHC_class_I_protein_complex	HLA-F,HLA-G,HLA-B,HLA-C
				0.0015307692	MHC_class_II_receptor_activity	HLA-DPA1,HLA-DRB1,HLA-DOB,HLA-DRA,HLA-DQB2,HLA-DQA2,HLA-DQA1
				0.0015307692	antigen_processing_and_presentation_of_peptide_or_polysaccharide_antigen_via_MHC_class_II	HLA-DPB1,HLA-DPA1,HLA-DRA,HLA-DQB1,HLA-DQB2,HLA-DQA1
				0.0024837500	positive_regulation_of_T_cell_mediated_cytotoxicity	HLA-F,HLA-G,HLA-B,HLA-C,P2RX7,TAP2
				0.0024837500	antigen_processing_and_presentation_of_exogenous_peptide_antigen_via_MHC_class_I_TAP_independent	HLA-F,HLA-G,HLA-B,HLA-C
				0.0024837500	interferon_gamma_mediated_signaling_pathway	HLA-DPB1,HLA-DPA1,HLA-DRB1,HLA-DRB5,HLA-F,HLA-G,HLA-B,HLA-C,HLA-DRA,HLA-DQB2,HLA-DQA2,HLA-DQA1
				0.0035335294	serine_type_endopeptidase_inhibitor_activity	ITIH5,WFDC8,WFDC1,RECK,CD109,SPINT4,SERPINE2,A2ML1,SERPINB5,SERPINB9,SPINK2,SPINK4,SPINK5,SERPINB10,SPOCK1
				0.0045666667	leukotriene_B4_20_monooxygenase_activity	CYP4F2,CYP4F3,CYP4F12
				0.0127426316	negative_regulation_of_blood_coagulation	CYP4F2,KNG1,SERPINE2,TSPAN8,CYP4F12
				0.0142000000	lysosomal_membrane	SLC2A8,STX8,HLA-DPB1,HPSE,SLC17A5,HLA-DPA1,HLA-DRB1,HLA-DRB5,WDR11,LITAF,TMEM106B,PLD1,HLA-DOB,CUBN,TLDC1,MYO7A,HLA-DRA,OCA2,ENPP1,DAB2,SLC26A11,HLA-DQB2,HLA-DQA2,HLA-DQA1,TMEM165,ATP6V0A4,GPR137B,DRAM1,SCARB1,SCARB2
				0.0472090476	keratin_filament	KRTAP10-6,KRTAP10-7,KRT84,KRTAP5-5,KRTAP5-9,KRTAP3-2
		Population	tf	FDR	Category description	Genes
		YRI	UNION	0.0011681250	serine_type_endopeptidase_inhibitor_activity	ITIH5,ITIH4,WFDC8,WFDC1,RECK,CD109,SPINT4,SERPINE2,A2ML1,SERPINB1,SERPINB5,SERPINB9,SPINK2,SPINK4,SPINK5,SERPINB10,SPOCK1
				0.0011681250	ER_to_Golgi_transport_vesicle_membrane	HLA-DPB1,HLA-DPA1,HLA-DRB1,HLA-DRB5,HLA-F,HLA-G,HLA-B,HLA-C,HLA-DRA,HLA-DQB2,HLA-DQA2,HLA-DQA1
				0.0011681250	antigen_processing_and_presentation	HLA-DPB1,HLA-DPA1,HLA-DRB1,HLA-DRB5,HLA-F,HLA-G,HLA-B,HLA-C,HLA-DOB,HLA-DRA,HLA-DQB1,HLA-DQB2,HLA-DQA2,HLA-DQA1
				0.0011681250	integral_to_lumenal_side_of_endoplasmic_reticulum_membrane	HLA-DPB1,HLA-DPA1,HLA-DRB1,HLA-DRB5,HLA-F,HLA-G,HLA-B,HLA-C,HLA-DRA,HLA-DQB2,HLA-DQA2,HLA-DQA1
				0.0011681250	keratin_filament	KRTAP10-6,KRTAP10-7,KRT14,KRT6A,KRT84,KRT83,KRTAP5-5,KRTAP5-9,KRTAP3-2
				0.0011681250	trans_Golgi_network_membrane	LGR5,HLA-DPB1,HLA-DPA1,MARCH1,HLA-DRB1,HLA-DRB5,CALN1,HLA-DRA,HLA-DQB2,HLA-DQA2,HLA-DQA1,KIF13A,TMEM165
				0.0011681250	antigen_processing_and_presentation_of_exogenous_peptide_antigen_via_MHC_class_I_TAP_independent	HLA-F,HLA-G,HLA-B,HLA-C
				0.0011681250	extracellular_region	LIPC,JAG1,ITIH5,ITIH4,TEK,CDA,ISM1,CELA3B,IGFBP7,WFDC8,RNASE11,WFDC1,SPP2,CPA5,EPDR1,FSTL4,ADAM28,TMPRSS11E,TMPRSS11F,CPA3,NRG3,ANGPT2,DSCAM,ANGPT1,HSD17B11,FGF14,NXPH1,HPSE,UTS2B,CXCL11,LAMA2,LAMA1,CPE,PRB2,HHLA1,PAMR1,VWF,LAMC2,LAMC1,ERBB4,NTN1,REG4,EYS,IL1RL1,SCGB3A2,THSD7A,PCDHA10,FCER2,NMS,COL4A2,COL4A4,COL4A3,PDGFD,PDGFC,PDGFB,NRP1,NOTCH4,ADAM12,ADAM11,PCDH15,TREML4,FAS,CLCA2,NPNT,PRLR,HGF,…
				0.0011681250	immune_response	PXDN,HLA-DPB1,CXCL11,HLA-DPA1,CMKLR1,MARCH1,HLA-DRB1,HLA-DRB5,IL1RL1,FAS,RGS1,IL18R1,CNR2,HLA-F,HLA-G,HLA-B,HLA-C,HLA-DOB,CHIA,IL1R1,COLEC12,VPREB1,HLA-DRA,IL10RB,LY75,ENPP1,HLA-DQB1,HLA-DQB2,TRIM22,OPRK1,HLA-DQA2,HLA-DQA1,SERPINB9,TLR10,CD96
				0.0011681250	peptide_antigen_binding	HLA-DRB1,HLA-F,HLA-G,HLA-B,HLA-C,TAP2,SLC7A5
				0.0011681250	clathrin_coated_endocytic_vesicle_membrane	HLA-DPB1,HLA-DPA1,HLA-DRB1,HLA-DRB5,HLA-DRA,HLA-DQB2,HLA-DQA2,HLA-DQA1
				0.0011681250	transport_vesicle_membrane	RAB11FIP5,HLA-DPB1,CPE,HLA-DPA1,HLA-DRB1,HLA-DRB5,PTPRN2,SPRED2,HLA-DRA,HLA-DQB2,HLA-DQA2,HLA-DQA1
				0.0011681250	MHC_class_II_protein_complex	HLA-DPB1,HLA-DPA1,HLA-DRB1,HLA-DRB5,HLA-DOB,HLA-DRA,HLA-DQB1,HLA-DQB2,HLA-DQA2,HLA-DQA1
				0.0011681250	MHC_class_I_protein_complex	HLA-F,HLA-G,HLA-B,HLA-C
				0.0011681250	MHC_class_II_receptor_activity	HLA-DPA1,HLA-DRB1,HLA-DOB,HLA-DRA,HLA-DQB2,HLA-DQA2,HLA-DQA1
				0.0011681250	antigen_processing_and_presentation_of_peptide_or_polysaccharide_antigen_via_MHC_class_II	HLA-DPB1,HLA-DPA1,HLA-DRA,HLA-DQB1,HLA-DQB2,HLA-DQA1
				0.0066947368	integral_to_membrane	SLCO1B3,XXYLT1,JAG1,COX8C,SLC39A11,GLIPR1L2,RAMP3,SLC39A14,FAT2,ATP2B4,SLC2A9,SV2C,SLC26A7,ZPLD1,MRAP2,SLC37A1,SLCO1B7,PTPRK,EMP2,PTPRQ,GRID2,LPPR1,PTPRT,PCSK5,SHISA2,MS4A12,TMC5,TMC2,SLC2A5,SLC2A8,NINJ2,SLC15A2,PGBD5,PKHD1,EMR2,EMR1,LGR5,EVC2,SLC24A4,JPH2,FFAR4,MYOF,CACNA1A,CACNA1C,MINOS1,EGFR,SLC30A10,PKP2,CNTNAP2,DSC1,IZUMO1,CNTNAP4,CNTNAP5,ABCG2,ODF4,SLCO5A1,ADAM28,YIPF7,LHFPL2,BTNL2,LHFPL3,S…
				0.0066947368	leukotriene_B4_20_monooxygenase_activity	CYP4F2,CYP4F3,CYP4F12
				0.0066947368	interferon_gamma_mediated_signaling_pathway	HLA-DPB1,HLA-DPA1,HLA-DRB1,HLA-DRB5,IRF1,HLA-F,HLA-G,HLA-B,HLA-C,HLA-DRA,HLA-DQB2,HLA-DQA2,HLA-DQA1
				0.0082019048	positive_regulation_of_T_cell_mediated_cytotoxicity	HLA-F,HLA-G,HLA-B,HLA-C,P2RX7,TAP2
				0.0082019048	lysosomal_membrane	SLC2A8,STX8,HLA-DPB1,HPSE,SLC17A5,HLA-DPA1,MARCH1,HLA-DRB1,HLA-DRB5,AHNAK,WDR11,LITAF,TMEM106B,PLD1,HLA-DOB,CUBN,RPTOR,TLDC1,MYO7A,HLA-DRA,OCA2,ENPP1,DAB2,SLC26A11,HLA-DQB2,GPLD1,HLA-DQA2,HLA-DQA1,TMEM165,ATP6V0A4,TMEM192,GPR137B,DRAM1,SCARB1,SCARB2
				0.0261122727	negative_regulation_of_blood_coagulation	CYP4F2,KNG1,SERPINE2,TSPAN8,CYP4F12
				0.0412513043	antigen_processing_and_presentation_of_endogenous_peptide_antigen_via_MHC_class_I	TAP2,ERAP1,ERAP2

## Sheet: YRI_signif_no_HLA
		Population	tf	FDR	Category description	Genes
		YRI	0.5	0.0310350000	integral_to_membrane	SLCO1B3,SLC39A11,JAG1,GLIPR1L2,RAMP3,FAT2,ATP2B4,SLC2A9,SV2C,SLC26A7,ZPLD1,SLCO1B7,PTPRK,EMP2,PTPRQ,GRID2,PTPRT,PCSK5,MS4A12,TMC5,TMC2,SLC2A5,SLC2A8,SLC15A2,PGBD5,PKHD1,EMR2,EMR1,LGR5,EVC2,SLC24A4,JPH2,MYOF,CACNA1A,MINOS1,EGFR,SLC30A10,CNTNAP2,DSC1,CNTNAP4,CNTNAP5,ABCG2,ODF4,YIPF7,LHFPL2,BTNL2,SLC25A21,SLC25A25,ACBD5,DSG1,FAM155A,LRP1B,PDE3A,ASIC2,SLC25A37,MS4A6E,GABRB3,GSG1L,ABCB11,TMEM232,SLC17…
				0.0310350000	keratin_filament	KRTAP10-7,KRT14,KRT6A,KRT84,KRT83,KRTAP5-5,KRTAP3-2
		YRI	0.4	0.0192800000	keratin_filament	KRTAP10-7,KRT14,KRT6A,KRT84,KRT83,KRTAP5-5,KRTAP5-9,KRTAP3-2
		YRI	0.3	0.0065566667	serine_type_endopeptidase_inhibitor_activity	ITIH5,WFDC8,WFDC1,RECK,CD109,SPINT4,SERPINE2,A2ML1,SERPINB5,SERPINB9,SPINK2,SPINK4,SPINK5,SERPINB10,SPOCK1
				0.0065566667	leukotriene_B4_20_monooxygenase_activity	CYP4F2,CYP4F3,CYP4F12
				0.0065566667	extracellular_region	LIPC,ITIH5,ISM1,CELA3B,IGFBP7,WFDC8,RNASE11,WFDC1,SPP2,CPA5,ADAM28,TMPRSS11E,TMPRSS11F,CPA3,NRG3,ANGPT2,DSCAM,HSD17B11,FGF14,NXPH1,HPSE,UTS2B,CXCL11,LAMA2,LAMA1,CPE,PRB2,PAMR1,VWF,LAMC2,LAMC1,ERBB4,NTN1,REG4,EYS,IL1RL1,SCGB3A2,THSD7A,PCDHA10,FCER2,NMS,COL4A2,COL4A4,COL4A3,PDGFC,NRP1,PDGFB,NOTCH4,PCDH15,TREML4,FAS,CLCA2,NPNT,PRLR,F13A1,COL24A1,MMP2,SMR3A,FBN2,OVCH1,CES5A,HS3ST4,PLEK,ST6GAL1,TSPEAR…
				0.0433150000	negative_regulation_of_blood_coagulation	CYP4F2,KNG1,SERPINE2,TSPAN8,CYP4F12

## Sheet: YRI_outliers
		Population	tf	FDR	Category description	Genes
		YRI	0.5	0.0007810000	antigen_processing_and_presentation_of_exogenous_peptide_antigen_via_MHC_class_I_TAP_independent	HLA-F,HLA-G,HLA-B,HLA-C
				0.0007810000	interferon_gamma_mediated_signaling_pathway	HLA-DPB1,HLA-DQB2,HLA-F,HLA-G,HLA-B,HLA-C,HLA-DPA1,HLA-DRB1,HLA-DRB5,HLA-DQA2,HLA-DQA1
				0.0007810000	cytokine_mediated_signaling_pathway	HLA-DPB1,HLA-DQB2,HLA-F,HLA-G,HLA-B,HLA-C,HLA-DPA1,HLA-DRB1,HLA-DRB5,HLA-DQA2,HLA-DQA1
				0.0007810000	immune_response	HLA-DPB1,HLA-DQB1,HLA-DQB2,HLA-F,HLA-G,HLA-B,HLA-C,HLA-DPA1,HLA-DRB1,HLA-DRB5,HLA-DQA2,HLA-DQA1
				0.0007810000	peptide_antigen_binding	HLA-F,HLA-G,HLA-B,HLA-C,HLA-DRB1
				0.0007810000	clathrin_coated_endocytic_vesicle_membrane	HLA-DPB1,HLA-DQB2,HLA-DPA1,HLA-DRB1,HLA-DRB5,HLA-DQA2,HLA-DQA1
				0.0007810000	antigen_processing_and_presentation	HLA-DPB1,HLA-DQB1,HLA-DQB2,HLA-F,HLA-G,HLA-B,HLA-C,HLA-DPA1,HLA-DRB1,HLA-DRB5,HLA-DQA2,HLA-DQA1
				0.0007810000	antigen_processing_and_presentation_of_exogenous_peptide_antigen_via_MHC_class_II	HLA-DPB1,HLA-DQB2,HLA-DPA1,HLA-DRB1,HLA-DRB5,HLA-DQA2,HLA-DQA1
				0.0007810000	endocytic_vesicle_membrane	HLA-DPB1,HLA-DQB2,HLA-DPA1,HLA-DRB1,HLA-DRB5,HLA-DQA2,HLA-DQA1
				0.0007810000	transport_vesicle_membrane	HLA-DPB1,HLA-DQB2,CPE,HLA-DPA1,HLA-DRB1,HLA-DRB5,HLA-DQA2,HLA-DQA1
				0.0007810000	MHC_class_II_protein_complex	HLA-DPB1,HLA-DQB1,HLA-DQB2,HLA-DPA1,HLA-DRB1,HLA-DRB5,HLA-DQA2,HLA-DQA1
				0.0007810000	MHC_class_I_protein_complex	HLA-F,HLA-G,HLA-B,HLA-C
				0.0007810000	positive_regulation_of_T_cell_mediated_cytotoxicity	HLA-F,HLA-G,HLA-B,HLA-C
				0.0007810000	phagocytic_vesicle_membrane	DMBT1,HLA-F,HLA-G,HLA-B,HLA-C
				0.0007810000	trans_Golgi_network_membrane	HLA-DPB1,HLA-DQB2,HLA-DPA1,HLA-DRB1,HLA-DRB5,HLA-DQA2,HLA-DQA1
				0.0007810000	ER_to_Golgi_transport_vesicle_membrane	HLA-DPB1,HLA-DQB2,HLA-F,HLA-G,HLA-B,HLA-C,HLA-DPA1,HLA-DRB1,HLA-DRB5,HLA-DQA2,HLA-DQA1
				0.0007810000	MHC_class_II_receptor_activity	HLA-DQB2,HLA-DPA1,HLA-DRB1,HLA-DQA2,HLA-DQA1
				0.0007810000	integral_to_lumenal_side_of_endoplasmic_reticulum_membrane	HLA-DPB1,HLA-DQB2,HLA-F,HLA-G,HLA-B,HLA-C,HLA-DPA1,HLA-DRB1,HLA-DRB5,HLA-DQA2,HLA-DQA1
				0.0007810000	T_cell_costimulation	HLA-DPB1,HLA-DQB2,HLA-DPA1,LGALS8,HLA-DRB1,HLA-DRB5,HLA-DQA2,HLA-DQA1
				0.0007810000	antigen_processing_and_presentation_of_peptide_or_polysaccharide_antigen_via_MHC_class_II	HLA-DPB1,HLA-DQB1,HLA-DQB2,HLA-DPA1,HLA-DQA1
				0.0023195455	lysosomal_membrane	HLA-DPB1,SLC17A5,HLA-DQB2,HLA-DPA1,HLA-DRB1,GPR137B,HLA-DRB5,HLA-DQA2,HLA-DQA1
				0.0023195455	T_cell_receptor_signaling_pathway	HLA-DPB1,HLA-DQB2,HLA-DPA1,HLA-DRB1,HLA-DRB5,HLA-DQA2,HLA-DQA1
				0.0029443478	antigen_processing_and_presentation_of_exogenous_peptide_antigen_via_MHC_class_I_TAP_dependent	PSMC1,HLA-F,HLA-G,HLA-B,HLA-C
				0.0033460000	type_I_interferon_signaling_pathway	HLA-F,HLA-G,HLA-B,HLA-C
				0.0033460000	antigen_processing_and_presentation_of_exogenous_peptide_antigen_via_MHC_class_I	PSMC1,HLA-F,HLA-G,HLA-B,HLA-C
				0.0067530769	antigen_processing_and_presentation_of_peptide_antigen_via_MHC_class_I	PSMC1,HLA-F,HLA-G,HLA-B,HLA-C
				0.0115514815	Golgi_membrane	HLA-DPB1,HLA-DQB2,HLA-F,HLA-G,ST6GAL1,HLA-B,HLA-C,HLA-DPA1,PDGFD,HLA-DRB1,HLA-DRB5,HLA-DQA2,HLA-DQA1,CHST11
				0.0247353571	detection_of_bacterium	HLA-DRB1,PGLYRP4
				0.0251568966	regulation_of_immune_response	HLA-F,HLA-G,HLA-B,HLA-C
		YRI	0.4	0.0008135000	antigen_processing_and_presentation_of_exogenous_peptide_antigen_via_MHC_class_I_TAP_independent	HLA-F,HLA-G,HLA-B,HLA-C
				0.0008135000	interferon_gamma_mediated_signaling_pathway	HLA-DPB1,HLA-DQB2,HLA-F,HLA-G,HLA-B,HLA-C,HLA-DPA1,HLA-DRB1,HLA-DRB5,HLA-DQA2,HLA-DQA1
				0.0008135000	cytokine_mediated_signaling_pathway	HLA-DPB1,HLA-DQB2,HLA-F,HLA-G,HLA-B,HLA-C,HLA-DPA1,HLA-DRB1,HLA-DRB5,HLA-DQA2,HLA-DQA1
				0.0008135000	immune_response	HLA-DPB1,HLA-DQB1,HLA-DQB2,CXCL11,HLA-F,HLA-G,HLA-B,HLA-C,HLA-DPA1,HLA-DRB1,HLA-DRB5,HLA-DQA2,HLA-DQA1
				0.0008135000	peptide_antigen_binding	HLA-F,HLA-G,HLA-B,HLA-C,HLA-DRB1
				0.0008135000	clathrin_coated_endocytic_vesicle_membrane	HLA-DPB1,HLA-DQB2,HLA-DPA1,HLA-DRB1,HLA-DRB5,HLA-DQA2,HLA-DQA1
				0.0008135000	antigen_processing_and_presentation	HLA-DPB1,HLA-DQB1,HLA-DQB2,HLA-F,HLA-G,HLA-B,HLA-C,HLA-DPA1,HLA-DRB1,HLA-DRB5,HLA-DQA2,HLA-DQA1
				0.0008135000	antigen_processing_and_presentation_of_exogenous_peptide_antigen_via_MHC_class_II	HLA-DPB1,HLA-DQB2,HLA-DPA1,HLA-DRB1,HLA-DRB5,HLA-DQA2,HLA-DQA1
				0.0008135000	endocytic_vesicle_membrane	HLA-DPB1,HLA-DQB2,HLA-DPA1,HLA-DRB1,HLA-DRB5,HLA-DQA2,HLA-DQA1
				0.0008135000	transport_vesicle_membrane	HLA-DPB1,HLA-DQB2,CPE,HLA-DPA1,HLA-DRB1,HLA-DRB5,HLA-DQA2,HLA-DQA1
				0.0008135000	MHC_class_II_protein_complex	HLA-DPB1,HLA-DQB1,HLA-DQB2,HLA-DPA1,HLA-DRB1,HLA-DRB5,HLA-DQA2,HLA-DQA1
				0.0008135000	MHC_class_I_protein_complex	HLA-F,HLA-G,HLA-B,HLA-C
				0.0008135000	positive_regulation_of_T_cell_mediated_cytotoxicity	HLA-F,HLA-G,HLA-B,HLA-C
				0.0008135000	phagocytic_vesicle_membrane	DMBT1,HLA-F,HLA-G,HLA-B,HLA-C
				0.0008135000	trans_Golgi_network_membrane	HLA-DPB1,HLA-DQB2,HLA-DPA1,HLA-DRB1,HLA-DRB5,HLA-DQA2,HLA-DQA1
				0.0008135000	ER_to_Golgi_transport_vesicle_membrane	HLA-DPB1,HLA-DQB2,HLA-F,HLA-G,HLA-B,HLA-C,HLA-DPA1,HLA-DRB1,HLA-DRB5,HLA-DQA2,HLA-DQA1
				0.0008135000	MHC_class_II_receptor_activity	HLA-DQB2,HLA-DPA1,HLA-DRB1,HLA-DQA2,HLA-DQA1
				0.0008135000	integral_to_lumenal_side_of_endoplasmic_reticulum_membrane	HLA-DPB1,HLA-DQB2,HLA-F,HLA-G,HLA-B,HLA-C,HLA-DPA1,HLA-DRB1,HLA-DRB5,HLA-DQA2,HLA-DQA1
				0.0008135000	T_cell_costimulation	HLA-DPB1,HLA-DQB2,HLA-DPA1,LGALS8,HLA-DRB1,HLA-DRB5,HLA-DQA2,HLA-DQA1
				0.0008135000	antigen_processing_and_presentation_of_peptide_or_polysaccharide_antigen_via_MHC_class_II	HLA-DPB1,HLA-DQB1,HLA-DQB2,HLA-DPA1,HLA-DQA1
				0.0015131818	type_I_interferon_signaling_pathway	HLA-F,HLA-G,HLA-B,HLA-C
				0.0015131818	T_cell_receptor_signaling_pathway	HLA-DPB1,HLA-DQB2,HLA-DPA1,HLA-DRB1,HLA-DRB5,HLA-DQA2,HLA-DQA1
				0.0028986957	lysosomal_membrane	HLA-DPB1,SLC17A5,HLA-DQB2,HLA-DPA1,HLA-DRB1,GPR137B,HLA-DRB5,HLA-DQA2,HLA-DQA1
				0.0170150000	antigen_processing_and_presentation_of_exogenous_peptide_antigen_via_MHC_class_I_TAP_dependent	HLA-F,HLA-G,HLA-B,HLA-C
				0.0219816000	Golgi_membrane	HLA-DPB1,HLA-DQB2,HLA-F,HLA-G,HLA-B,HLA-C,HLA-DPA1,PDGFD,HLA-DRB1,HLA-DRB5,HLA-DQA2,HLA-DQA1,CHST11
				0.0225546154	antigen_processing_and_presentation_of_exogenous_peptide_antigen_via_MHC_class_I	HLA-F,HLA-G,HLA-B,HLA-C
				0.0282759259	detection_of_bacterium	HLA-DRB1,PGLYRP4
				0.0306728571	regulation_of_immune_response	HLA-F,HLA-G,HLA-B,HLA-C
				0.0454820690	antigen_processing_and_presentation_of_peptide_antigen_via_MHC_class_I	HLA-F,HLA-G,HLA-B,HLA-C
		YRI	0.3	0.0007480952	antigen_processing_and_presentation_of_exogenous_peptide_antigen_via_MHC_class_I_TAP_independent	HLA-F,HLA-G,HLA-B,HLA-C
				0.0007480952	interferon_gamma_mediated_signaling_pathway	HLA-DPB1,HLA-DQB2,HLA-F,HLA-G,HLA-B,HLA-C,HLA-DPA1,HLA-DRB1,HLA-DRB5,HLA-DQA2,HLA-DQA1
				0.0007480952	type_I_interferon_signaling_pathway	HLA-F,HLA-G,HLA-B,HLA-C
				0.0007480952	cytokine_mediated_signaling_pathway	HLA-DPB1,HLA-DQB2,HLA-F,HLA-G,HLA-B,HLA-C,HLA-DPA1,HLA-DRB1,HLA-DRB5,HLA-DQA2,HLA-DQA1
				0.0007480952	immune_response	HLA-DPB1,HLA-DQB1,HLA-DQB2,CXCL11,HLA-F,HLA-G,HLA-B,HLA-C,HLA-DPA1,HLA-DRB1,HLA-DRB5,HLA-DQA2,HLA-DQA1
				0.0007480952	peptide_antigen_binding	HLA-F,HLA-G,HLA-B,HLA-C,HLA-DRB1,TAP2
				0.0007480952	clathrin_coated_endocytic_vesicle_membrane	HLA-DPB1,HLA-DQB2,HLA-DPA1,HLA-DRB1,HLA-DRB5,HLA-DQA2,HLA-DQA1
				0.0007480952	antigen_processing_and_presentation	HLA-DPB1,HLA-DQB1,HLA-DQB2,HLA-F,HLA-G,HLA-B,HLA-C,HLA-DPA1,HLA-DRB1,HLA-DRB5,HLA-DQA2,HLA-DQA1
				0.0007480952	antigen_processing_and_presentation_of_exogenous_peptide_antigen_via_MHC_class_II	HLA-DPB1,HLA-DQB2,HLA-DPA1,HLA-DRB1,HLA-DRB5,HLA-DQA2,HLA-DQA1
				0.0007480952	endocytic_vesicle_membrane	HLA-DPB1,HLA-DQB2,HLA-DPA1,HLA-DRB1,HLA-DRB5,HLA-DQA2,HLA-DQA1
				0.0007480952	transport_vesicle_membrane	HLA-DPB1,HLA-DQB2,CPE,HLA-DPA1,HLA-DRB1,HLA-DRB5,HLA-DQA2,HLA-DQA1
				0.0007480952	MHC_class_II_protein_complex	HLA-DPB1,HLA-DQB1,HLA-DQB2,HLA-DPA1,HLA-DRB1,HLA-DRB5,HLA-DQA2,HLA-DQA1
				0.0007480952	MHC_class_I_protein_complex	HLA-F,HLA-G,HLA-B,HLA-C
				0.0007480952	positive_regulation_of_T_cell_mediated_cytotoxicity	HLA-F,HLA-G,HLA-B,HLA-C,TAP2
				0.0007480952	trans_Golgi_network_membrane	HLA-DPB1,HLA-DQB2,HLA-DPA1,HLA-DRB1,HLA-DRB5,HLA-DQA2,HLA-DQA1
				0.0007480952	ER_to_Golgi_transport_vesicle_membrane	HLA-DPB1,HLA-DQB2,HLA-F,HLA-G,HLA-B,HLA-C,HLA-DPA1,HLA-DRB1,HLA-DRB5,HLA-DQA2,HLA-DQA1
				0.0007480952	MHC_class_II_receptor_activity	HLA-DQB2,HLA-DPA1,HLA-DRB1,HLA-DQA2,HLA-DQA1
				0.0007480952	integral_to_lumenal_side_of_endoplasmic_reticulum_membrane	HLA-DPB1,HLA-DQB2,HLA-F,HLA-G,HLA-B,HLA-C,HLA-DPA1,HLA-DRB1,HLA-DRB5,HLA-DQA2,HLA-DQA1
				0.0007480952	T_cell_receptor_signaling_pathway	HLA-DPB1,HLA-DQB2,HLA-DPA1,HLA-DRB1,HLA-DRB5,HLA-DQA2,HLA-DQA1
				0.0007480952	T_cell_costimulation	HLA-DPB1,HLA-DQB2,HLA-DPA1,HLA-DRB1,HLA-DRB5,HLA-DQA2,HLA-DQA1
				0.0007480952	antigen_processing_and_presentation_of_peptide_or_polysaccharide_antigen_via_MHC_class_II	HLA-DPB1,HLA-DQB1,HLA-DQB2,HLA-DPA1,HLA-DQA1
				0.0020558333	antigen_processing_and_presentation_of_exogenous_peptide_antigen_via_MHC_class_I_TAP_dependent	HLA-F,HLA-G,HLA-B,HLA-C,TAP2
				0.0020558333	sarcolemma	ANK3,ANK2,SLC27A6,DTNA,SNTG2,SGCG,SNTB1,SGCZ
				0.0020558333	antigen_processing_and_presentation_of_exogenous_peptide_antigen_via_MHC_class_I	HLA-F,HLA-G,HLA-B,HLA-C,TAP2
				0.0026092000	antigen_processing_and_presentation_of_peptide_antigen_via_MHC_class_I	HLA-F,HLA-G,HLA-B,HLA-C,TAP2
				0.0062215385	phagocytic_vesicle_membrane	HLA-F,HLA-G,HLA-B,HLA-C
				0.0114711111	lysosomal_membrane	HLA-DPB1,SLC17A5,HLA-DQB2,HLA-DPA1,HLA-DRB1,HLA-DRB5,HLA-DQA2,HLA-DQA1
				0.0134296552	regulation_of_immune_response	HLA-F,HLA-G,HLA-B,HLA-C
				0.0134296552	paranode_region_of_axon	ANK3,NFASC,NCMAP
				0.0248553333	detection_of_bacterium	HLA-DRB1,PGLYRP4
				0.0414167742	Golgi_membrane	HLA-DPB1,HLA-DQB2,HLA-F,HLA-G,HLA-B,HLA-C,HLA-DPA1,HLA-DRB1,HLA-DRB5,HLA-DQA2,HLA-DQA1,CHST11
		Population	tf	FDR	Category description	Genes
		YRI	UNION	0.0009031579	antigen_processing_and_presentation_of_exogenous_peptide_antigen_via_MHC_class_I_TAP_independent	HLA-F,HLA-G,HLA-B,HLA-C
				0.0009031579	antigen_processing_and_presentation_of_exogenous_peptide_antigen_via_MHC_class_I_TAP_dependent	PSMC1,TAP2,HLA-F,HLA-G,HLA-B,HLA-C
				0.0009031579	interferon_gamma_mediated_signaling_pathway	HLA-DPB1,HLA-DQB2,HLA-F,HLA-G,HLA-B,HLA-C,HLA-DPA1,HLA-DRB5,HLA-DQA2,HLA-DQA1
				0.0009031579	cytokine_mediated_signaling_pathway	HLA-DPB1,HLA-DQB2,HLA-F,HLA-G,HLA-B,HLA-C,HLA-DPA1,HLA-DRB5,HLA-DQA2,HLA-DQA1
				0.0009031579	immune_response	HLA-DPB1,HLA-DQB1,HLA-DQB2,CXCL11,HLA-F,HLA-G,HLA-B,HLA-C,HLA-DPA1,HLA-DRB5,HLA-DQA2,HLA-DQA1
				0.0009031579	peptide_antigen_binding	TAP2,HLA-F,HLA-G,HLA-B,HLA-C
				0.0009031579	clathrin_coated_endocytic_vesicle_membrane	HLA-DPB1,HLA-DQB2,HLA-DPA1,HLA-DRB5,HLA-DQA2,HLA-DQA1
				0.0009031579	antigen_processing_and_presentation	HLA-DPB1,HLA-DQB1,HLA-DQB2,HLA-F,HLA-G,HLA-B,HLA-C,HLA-DPA1,HLA-DRB5,HLA-DQA2,HLA-DQA1
				0.0009031579	transport_vesicle_membrane	HLA-DPB1,HLA-DQB2,CPE,HLA-DPA1,HLA-DRB5,HLA-DQA2,HLA-DQA1
				0.0009031579	MHC_class_II_protein_complex	HLA-DPB1,HLA-DQB1,HLA-DQB2,HLA-DPA1,HLA-DRB5,HLA-DQA2,HLA-DQA1
				0.0009031579	MHC_class_I_protein_complex	HLA-F,HLA-G,HLA-B,HLA-C
				0.0009031579	positive_regulation_of_T_cell_mediated_cytotoxicity	TAP2,HLA-F,HLA-G,HLA-B,HLA-C
				0.0009031579	antigen_processing_and_presentation_of_exogenous_peptide_antigen_via_MHC_class_I	PSMC1,TAP2,HLA-F,HLA-G,HLA-B,HLA-C
				0.0009031579	trans_Golgi_network_membrane	HLA-DPB1,HLA-DQB2,HLA-DPA1,HLA-DRB5,HLA-DQA2,HLA-DQA1
				0.0009031579	ER_to_Golgi_transport_vesicle_membrane	HLA-DPB1,HLA-DQB2,HLA-F,HLA-G,HLA-B,HLA-C,HLA-DPA1,HLA-DRB5,HLA-DQA2,HLA-DQA1
				0.0009031579	MHC_class_II_receptor_activity	HLA-DQB2,HLA-DPA1,HLA-DQA2,HLA-DQA1
				0.0009031579	integral_to_lumenal_side_of_endoplasmic_reticulum_membrane	HLA-DPB1,HLA-DQB2,HLA-F,HLA-G,HLA-B,HLA-C,HLA-DPA1,HLA-DRB5,HLA-DQA2,HLA-DQA1
				0.0009031579	T_cell_costimulation	HLA-DPB1,HLA-DQB2,HLA-DPA1,LGALS8,HLA-DRB5,HLA-DQA2,HLA-DQA1
				0.0009031579	antigen_processing_and_presentation_of_peptide_or_polysaccharide_antigen_via_MHC_class_II	HLA-DPB1,HLA-DQB1,HLA-DQB2,HLA-DPA1,HLA-DQA1
				0.0025152381	antigen_processing_and_presentation_of_peptide_antigen_via_MHC_class_I	PSMC1,TAP2,HLA-F,HLA-G,HLA-B,HLA-C
				0.0025152381	phagocytic_vesicle_membrane	DMBT1,HLA-F,HLA-G,HLA-B,HLA-C
				0.0065427273	endocytic_vesicle_membrane	HLA-DPB1,HLA-DQB2,HLA-DPA1,HLA-DRB5,HLA-DQA2,HLA-DQA1
				0.0080239130	sarcolemma	ANK3,ANK2,SLC27A6,DTNA,SNTG2,SGCG,LAMA2,SNTB1,SGCZ
				0.0130154167	antigen_processing_and_presentation_of_exogenous_peptide_antigen_via_MHC_class_II	HLA-DPB1,HLA-DQB2,HLA-DPA1,HLA-DRB5,HLA-DQA2,HLA-DQA1
				0.0141844000	type_I_interferon_signaling_pathway	HLA-F,HLA-G,HLA-B,HLA-C

## Sheet: YRI_outliers_no-HLA
		Population	tf	FDR	Category description	Genes
		YRI	0.3	0.0152800000	sarcolemma	ANK3,ANK2,SLC27A6,DTNA,SNTG2,SGCG,SNTB1,SGCZ

## Sheet: LWK_signif
		Population	tf	FDR	Category description	Genes
		LWK	0.5	0.0013721429	trans_Golgi_network_membrane	LGR5,HLA-DPB1,HLA-DPA1,MARCH1,HLA-DRB1,HLA-DRB5,CALN1,HLA-DRA,HLA-DQB2,HLA-DQA2,HLA-DQA1
				0.0013721429	ER_to_Golgi_transport_vesicle_membrane	HLA-DPB1,HLA-DPA1,HLA-DRB1,HLA-DRB5,HLA-F,HLA-G,HLA-B,HLA-C,HLA-DRA,HLA-DQB2,HLA-DQA2,HLA-DQA1
				0.0013721429	antigen_processing_and_presentation_of_exogenous_peptide_antigen_via_MHC_class_I_TAP_independent	HLA-F,HLA-G,HLA-B,HLA-C
				0.0013721429	interferon_gamma_mediated_signaling_pathway	HLA-DPB1,HLA-DPA1,HLA-DRB1,HLA-DRB5,IRF1,HLA-F,HLA-G,HLA-B,HLA-C,HLA-DRA,HLA-DQB2,HLA-DQA2,HLA-DQA1
				0.0013721429	immune_response	PXDN,HLA-DPB1,CXCL11,HLA-DPA1,CMKLR1,MARCH1,HLA-DRB1,HLA-DRB5,IL1RL1,IL18R1,CNR2,HLA-F,HLA-G,HLA-B,HLA-C,IL1R2,COLEC12,HLA-DRA,ENPP1,HLA-DQB1,HLA-DQB2,TRIM22,HLA-DQA2,HLA-DQA1,FYB,TLR10,VAV1,FAM65C,CCL26,TNFSF10,CD96
				0.0013721429	peptide_antigen_binding	HLA-DRB1,HLA-F,HLA-G,HLA-B,HLA-C,TAP1,SLC7A5
				0.0013721429	clathrin_coated_endocytic_vesicle_membrane	HLA-DPB1,HLA-DPA1,HLA-DRB1,HLA-DRB5,HLA-DRA,HLA-DQB2,HLA-DQA2,HLA-DQA1
				0.0013721429	antigen_processing_and_presentation	HLA-DPB1,HLA-DPA1,HLA-DRB1,HLA-DRB5,PSMB9,HLA-F,HLA-G,HLA-B,HLA-C,HLA-DRA,HLA-DQB1,HLA-DQB2,HLA-DQA2,HLA-DQA1
				0.0013721429	transport_vesicle_membrane	HLA-DPB1,CPE,HLA-DPA1,HLA-DRB1,HLA-DRB5,ICA1,PTPRN2,HLA-DRA,HLA-DQB2,HLA-DQA2,HLA-DQA1
				0.0013721429	MHC_class_II_protein_complex	HLA-DPB1,HLA-DPA1,HLA-DRB1,HLA-DRB5,HLA-DRA,HLA-DQB1,HLA-DQB2,HLA-DQA2,HLA-DQA1
				0.0013721429	MHC_class_I_protein_complex	HLA-F,HLA-G,HLA-B,HLA-C
				0.0013721429	MHC_class_II_receptor_activity	HLA-DPA1,HLA-DRB1,HLA-DRA,HLA-DQB2,HLA-DQA2,HLA-DQA1
				0.0013721429	integral_to_lumenal_side_of_endoplasmic_reticulum_membrane	HLA-DPB1,HLA-DPA1,HLA-DRB1,HLA-DRB5,HLA-F,HLA-G,HLA-B,HLA-C,HLA-DRA,HLA-DQB2,HLA-DQA2,HLA-DQA1
				0.0013721429	antigen_processing_and_presentation_of_peptide_or_polysaccharide_antigen_via_MHC_class_II	HLA-DPB1,HLA-DPA1,HLA-DRA,HLA-DQB1,HLA-DQB2,HLA-DQA1
				0.0041460000	integral_to_membrane	SLC39A11,GLIPR1L2,RAMP3,FAT2,SLC2A9,SV2C,ATP2C2,SLC37A1,PTPRK,PTPRQ,GRID2,PTPRT,PCSK5,SHISA2,MS4A12,TMC2,SLC2A5,SLC15A2,PGBD5,PKHD1,EMR1,CORIN,LGR5,EVC2,SLC24A4,JPH2,PIGG,CACNA1A,MINOS1,EGFR,SLC30A10,CNTNAP2,DSC1,RGSL1,CNTNAP4,CNTNAP5,GLRA3,SIGLEC14,YIPF7,BNIP3L,LHFPL2,HLA-DPB1,SLC25A24,SLC25A25,ACBD5,FAM155A,LRP1B,MSMO1,PDE3A,ASIC2,SLC25A37,MS4A6E,GSG1L,TMEM220,SLC17A5,ABCC2,ZDHHC14,GABRG3,TMEM2…
				0.0052731250	antigen_processing_and_presentation_of_exogenous_peptide_antigen_via_MHC_class_I_TAP_dependent	NCF2,PSMB9,PSMC1,HLA-F,HLA-G,HLA-B,HLA-C,TAP1,CD36
				0.0066378947	lysosomal_membrane	STX8,HLA-DPB1,SLC17A5,HLA-DPA1,MARCH1,HLA-DRB1,HLA-DRB5,AHNAK,LITAF,TMEM106B,PLD1,CUBN,TLDC1,HLA-DRA,OCA2,ENPP1,DAB2,HLA-DQB2,GPLD1,HLA-DQA2,HLA-DQA1,ATP6V0A4,TMEM192,GPR137B,SCARB1,SCARB2
				0.0066378947	positive_regulation_of_T_cell_mediated_cytotoxicity	HLA-F,HLA-G,HLA-B,HLA-C,TAP1
				0.0066378947	endocytic_vesicle_membrane	HLA-DPB1,HLA-DPA1,HLA-DRB1,HLA-DRB5,MSR1,COLEC12,HLA-DRA,HLA-DQB2,HLA-DQA2,HLA-DQA1,CD36,SCARB1
				0.0096045000	integral_to_plasma_membrane	RAMP3,TEK,SLC2A9,PTPRK,PTPRM,GRID2,PTPRB,SLC15A2,PTPRD,EMR1,CORIN,LGR5,STX8,GLRA3,ADAM29,TMPRSS11E,TMPRSS11F,GOLM1,NRG3,ASIC2,SLC17A5,ABCC2,ALK,HLA-DPA1,CMKLR1,FLT1,FLT3,NCMAP,MSR1,ART3,ANK2,ANKH,PCDHA11,PCDHA10,SDC2,FLRT2,FCER2,NOTCH4,PTPRN2,PERP,GPC5,GPC6,FLVCR1,KCNMB3,SLC6A1,GRIK2,GRIK4,CHRM5,KCNH5,SCNN1G,CNR2,GRIN2A,HLA-B,GRM4,EPHA6,CLEC1A,CLEC1B,ADRA1A,PCDHAC1,PLA2R1,CDH4,ESYT2,TENM4,HLA-DRA…
				0.0113695238	extracellular_region	LIPC,TEK,CDA,PCSK9,CORIN,CELA3B,IGFBP7,SPINK14,WFDC8,RNASE11,VEGFC,CPA5,EPDR1,TMPRSS11E,TMPRSS11F,NRG3,ANGPT2,NXPH1,CXCL11,LAMA2,LAMA1,CPE,PRB2,HHLA1,PAMR1,VWF,LAMC2,LAMC1,ERBB4,NTN1,REG4,EYS,IL1RL1,THSD7A,PCDHA10,FCER2,NMS,COL4A4,COL4A3,PDGFD,NRP1,NOTCH4,PCDH15,TREML4,PRLR,COL24A1,MMP2,FBN2,OVCH1,ST6GAL1,TSPEAR,NELL1,MINOS1-NBL1,IL1R2,PRSS23,CFHR4,CFHR2,PLA2R1,ADAMTS3,AOAH,TMPRSS2,CNTN4,ADAMTS16…
				0.0141504545	antigen_processing_and_presentation_of_exogenous_peptide_antigen_via_MHC_class_I	NCF2,PSMB9,PSMC1,HLA-F,HLA-G,HLA-B,HLA-C,TAP1,CD36
				0.0175139130	T_cell_costimulation	HLA-DPB1,HLA-DPA1,HLA-DRB1,HLA-DRB5,HLA-DRA,HLA-DQB2,LGALS8,HLA-DQA2,HLA-DQA1,VAV1
				0.0383950000	antigen_processing_and_presentation_of_peptide_antigen_via_MHC_class_I	NCF2,PSMB9,PSMC1,HLA-F,HLA-G,HLA-B,HLA-C,TAP1,CD36,ERAP2
		LWK	0.4	0.0012200000	integral_to_membrane	SLCO1B3,XXYLT1,SLC39A11,GLIPR1L2,RAMP3,FAT2,SLC2A9,SV2C,ZPLD1,ATP2C2,SLC37A1,SLCO1B7,PTPRK,PTPRO,PTPRQ,GRID2,PTPRT,PCSK5,SHISA2,TMC2,SLC2A5,SLC15A2,PGBD5,PKHD1,EMR1,CORIN,LGR5,EVC2,SLC24A4,JPH2,PIGG,FFAR4,CACNA1A,CACNA1C,MINOS1,EGFR,SLC30A10,CNTNAP2,DSC1,RGSL1,CNTNAP4,CNTNAP5,GLRA3,SIGLEC14,SLCO5A1,YIPF7,BNIP3L,LHFPL2,HLA-DPB1,SLC25A24,SLC25A25,ACBD5,FAM155A,LRP1B,MSMO1,PDE3A,ASIC2,SLC25A37,MS4A6…
				0.0012200000	positive_regulation_of_T_cell_mediated_cytotoxicity	HLA-F,HLA-G,HLA-B,HLA-C,TAP1,TAP2
				0.0012200000	ER_to_Golgi_transport_vesicle_membrane	HLA-DPB1,HLA-DPA1,HLA-DRB1,HLA-DRB5,HLA-F,HLA-G,HLA-B,HLA-C,HLA-DRA,HLA-DQB2,HLA-DQA2,HLA-DQA1
				0.0012200000	antigen_processing_and_presentation	HLA-DPB1,HLA-DPA1,HLA-DRB1,HLA-DRB5,PSMB9,HLA-F,HLA-G,HLA-B,HLA-C,HLA-DRA,HLA-DQB1,HLA-DQB2,HLA-DQA2,HLA-DQA1
				0.0012200000	integral_to_lumenal_side_of_endoplasmic_reticulum_membrane	HLA-DPB1,HLA-DPA1,HLA-DRB1,HLA-DRB5,HLA-F,HLA-G,HLA-B,HLA-C,HLA-DRA,HLA-DQB2,HLA-DQA2,HLA-DQA1
				0.0012200000	trans_Golgi_network_membrane	LGR5,HLA-DPB1,HLA-DPA1,MARCH1,HLA-DRB1,HLA-DRB5,CALN1,HLA-DRA,HLA-DQB2,HLA-DQA2,HLA-DQA1
				0.0012200000	antigen_processing_and_presentation_of_exogenous_peptide_antigen_via_MHC_class_I_TAP_independent	HLA-F,HLA-G,HLA-B,HLA-C
				0.0012200000	interferon_gamma_mediated_signaling_pathway	SP100,HLA-DPB1,HLA-DPA1,HLA-DRB1,HLA-DRB5,HLA-F,HLA-G,HLA-B,HLA-C,HLA-DRA,HLA-DQB2,HLA-DQA2,HLA-DQA1
				0.0012200000	immune_response	PXDN,HLA-DPB1,CXCL11,HLA-DPA1,MARCH1,HLA-DRB1,HLA-DRB5,IL1RL1,IL18R1,CNR2,HLA-F,HLA-G,HLA-B,HLA-C,IL1R2,COLEC12,HLA-DRA,ENPP1,HLA-DQB1,HLA-DQB2,TRIM22,OPRK1,HLA-DQA2,HLA-DQA1,FYB,TLR10,VAV1,FAM65C,CCL26,TNFSF10,CD96
				0.0012200000	peptide_antigen_binding	HLA-DRB1,HLA-F,HLA-G,HLA-B,HLA-C,TAP1,TAP2
				0.0012200000	clathrin_coated_endocytic_vesicle_membrane	HLA-DPB1,HLA-DPA1,HLA-DRB1,HLA-DRB5,HLA-DRA,HLA-DQB2,HLA-DQA2,HLA-DQA1
				0.0012200000	transport_vesicle_membrane	RAB11FIP5,HLA-DPB1,CPE,HLA-DPA1,HLA-DRB1,HLA-DRB5,PTPRN2,HLA-DRA,HLA-DQB2,HLA-DQA2,HLA-DQA1
				0.0012200000	MHC_class_II_protein_complex	HLA-DPB1,HLA-DPA1,HLA-DRB1,HLA-DRB5,HLA-DRA,HLA-DQB1,HLA-DQB2,HLA-DQA2,HLA-DQA1
				0.0012200000	MHC_class_I_protein_complex	HLA-F,HLA-G,HLA-B,HLA-C
				0.0012200000	MHC_class_II_receptor_activity	HLA-DPA1,HLA-DRB1,HLA-DRA,HLA-DQB2,HLA-DQA2,HLA-DQA1
				0.0012200000	antigen_processing_and_presentation_of_peptide_or_polysaccharide_antigen_via_MHC_class_II	HLA-DPB1,HLA-DPA1,HLA-DRA,HLA-DQB1,HLA-DQB2,HLA-DQA1
				0.0066373684	antigen_processing_and_presentation_of_exogenous_peptide_antigen_via_MHC_class_I_TAP_dependent	NCF2,PSMB9,PSMC1,HLA-F,HLA-G,HLA-B,HLA-C,TAP1,TAP2,CD36
				0.0066373684	integral_to_plasma_membrane	SLCO1B3,RAMP3,TEK,SLC2A9,PTPRK,PTPRM,PTPRO,GRID2,PTPRB,SLC15A2,PTPRD,EMR1,CORIN,LGR5,STX8,GLRA3,ADAM29,TMPRSS11E,TMPRSS11F,GOLM1,NRG3,NRG1,ASIC2,SLC17A5,ABCC2,ALK,HLA-DPA1,FLT1,FLT3,NCMAP,MSR1,ART3,ANK2,ANKH,PCDHA11,PCDHA10,SDC2,FCER2,NOTCH4,PTPRN2,PERP,GPC5,GPC6,ADCY3,FLVCR1,KCNMB3,SLC6A1,GRIK4,KCNH5,CHRM3,SCNN1G,CNR2,GRIN2A,HLA-B,GRM4,GRM7,GRM8,SLC4A4,EPHA6,EPHB2,CLEC1A,CLEC1B,ADRA1A,PCDHAC1,CD…
				0.0066373684	antigen_processing_and_presentation_of_exogenous_peptide_antigen_via_MHC_class_I	NCF2,PSMB9,PSMC1,HLA-F,HLA-G,HLA-B,HLA-C,TAP1,TAP2,CD36
				0.0201345000	endocytic_vesicle_membrane	HLA-DPB1,HLA-DPA1,HLA-DRB1,HLA-DRB5,MSR1,COLEC12,HLA-DRA,HLA-DQB2,HLA-DQA2,HLA-DQA1,CD36,SCARB1
				0.0222704762	antigen_processing_and_presentation_of_endogenous_peptide_antigen_via_MHC_class_I	TAP1,TAP2,ERAP2
				0.0224200000	antigen_processing_and_presentation_of_peptide_antigen_via_MHC_class_I	NCF2,PSMB9,PSMC1,HLA-F,HLA-G,HLA-B,HLA-C,TAP1,TAP2,CD36,ERAP2
				0.0237991304	extracellular_region	LIPC,ITIH5,TEK,CDA,PCSK9,CORIN,CELA3B,IGFBP7,SPINK14,WFDC8,RNASE11,VEGFC,IGSF21,CPA5,TMPRSS11E,TMPRSS11F,NRG3,ANGPT2,NRG1,NXPH1,CXCL11,LAMA2,LAMA1,CPE,PRB2,HHLA1,VWF,LAMC2,LAMC1,ERBB4,NTN1,REG4,EYS,IL1RL1,THSD7A,PCDHA10,FCER2,NMS,COL4A4,COL4A3,PDGFD,NOTCH4,ADAM12,PCDH15,TREML4,PRLR,COL24A1,MMP2,FBN2,OVCH1,PLEK,ST6GAL1,TSPEAR,NELL1,PGLYRP4,MINOS1-NBL1,IL1R2,FNDC1,PRSS23,CFHR4,CLEC3A,CFHR2,ADAMTS3,…
				0.0428312500	T_cell_costimulation	HLA-DPB1,HLA-DPA1,HLA-DRB1,HLA-DRB5,HLA-DRA,HLA-DQB2,LGALS8,HLA-DQA2,HLA-DQA1,VAV1
		LWK	0.3	0.0012893333	positive_regulation_of_T_cell_mediated_cytotoxicity	HLA-F,HLA-G,HLA-B,HLA-C,TAP1,TAP2
				0.0012893333	ER_to_Golgi_transport_vesicle_membrane	HLA-DPB1,HLA-DPA1,HLA-DRB1,HLA-DRB5,HLA-F,HLA-G,HLA-B,HLA-C,HLA-DRA,HLA-DQB2,HLA-DQA2,HLA-DQA1
				0.0012893333	antigen_processing_and_presentation	HLA-DPB1,HLA-DPA1,HLA-DRB1,HLA-DRB5,PSMB9,HLA-F,HLA-G,HLA-B,HLA-C,HLA-DRA,HLA-DQB1,HLA-DQB2,HLA-DQA2,HLA-DQA1
				0.0012893333	antigen_processing_and_presentation_of_endogenous_peptide_antigen_via_MHC_class_I	TAP1,TAP2,ERAP1,ERAP2
				0.0012893333	integral_to_lumenal_side_of_endoplasmic_reticulum_membrane	HLA-DPB1,HLA-DPA1,HLA-DRB1,HLA-DRB5,HLA-F,HLA-G,HLA-B,HLA-C,HLA-DRA,HLA-DQB2,HLA-DQA2,HLA-DQA1
				0.0012893333	antigen_processing_and_presentation_of_exogenous_peptide_antigen_via_MHC_class_I_TAP_independent	HLA-F,HLA-G,HLA-B,HLA-C
				0.0012893333	interferon_gamma_mediated_signaling_pathway	SP100,HLA-DPB1,HLA-DPA1,HLA-DRB1,HLA-DRB5,HLA-F,HLA-G,HLA-B,HLA-C,HLA-DRA,HLA-DQB2,HLA-DQA2,HLA-DQA1
				0.0012893333	immune_response	PXDN,HLA-DPB1,CXCL11,HLA-DPA1,HLA-DRB1,HLA-DRB5,IL1RL1,IL18R1,CNR2,HLA-F,HLA-G,HLA-B,HLA-C,CHIA,HLA-DRA,ENPP1,HLA-DQB1,HLA-DQB2,TRIM22,OPRK1,HLA-DQA2,HLA-DQA1,FYB,TLR10,FAM65C,TNFSF10,CD96,DEFB1,IL1F10
				0.0012893333	peptide_antigen_binding	HLA-DRB1,HLA-F,HLA-G,HLA-B,HLA-C,TAP1,TAP2
				0.0012893333	clathrin_coated_endocytic_vesicle_membrane	HLA-DPB1,HLA-DPA1,HLA-DRB1,HLA-DRB5,HLA-DRA,HLA-DQB2,HLA-DQA2,HLA-DQA1
				0.0012893333	transport_vesicle_membrane	RAB11FIP5,HLA-DPB1,CPE,HLA-DPA1,HLA-DRB1,HLA-DRB5,PTPRN2,HLA-DRA,HLA-DQB2,HLA-DQA2,HLA-DQA1
				0.0012893333	MHC_class_II_protein_complex	HLA-DPB1,HLA-DPA1,HLA-DRB1,HLA-DRB5,HLA-DRA,HLA-DQB1,HLA-DQB2,HLA-DQA2,HLA-DQA1
				0.0012893333	MHC_class_I_protein_complex	HLA-F,HLA-G,HLA-B,HLA-C
				0.0012893333	MHC_class_II_receptor_activity	HLA-DPA1,HLA-DRB1,HLA-DRA,HLA-DQB2,HLA-DQA2,HLA-DQA1
				0.0012893333	antigen_processing_and_presentation_of_peptide_or_polysaccharide_antigen_via_MHC_class_II	HLA-DPB1,HLA-DPA1,HLA-DRA,HLA-DQB1,HLA-DQB2,HLA-DQA1
				0.0052400000	trans_Golgi_network_membrane	LGR5,HLA-DPB1,HLA-DPA1,HLA-DRB1,HLA-DRB5,CALN1,HLA-DRA,HLA-DQB2,HLA-DQA2,HLA-DQA1
				0.0062323529	extracellular_region	LIPC,ITIH5,TEK,CDA,PCSK9,CORIN,CELA3B,IGFBP7,SPINK14,WFDC8,RNASE11,SPP2,IGSF21,CPA5,FSTL4,ADAM28,TMPRSS11E,NRG3,ANGPT2,DSCAM,ANGPT1,NRG1,NXPH1,HPSE,CXCL11,LAMA2,LAMA1,CPE,PRB2,HHLA1,VWF,LAMC2,ERBB4,NTN1,SERPINA5,REG4,EYS,IL1RL1,THSD7A,PCDHA10,FCER2,NMS,COL4A1,COL4A4,COL4A3,NOV,PCDH15,LRCH3,NPNT,F13A1,COL24A1,MMP2,FBN2,OVCH1,HS3ST4,PSAPL1,PLEK,ST6GAL1,TSPEAR,NELL1,PGLYRP4,ACTN1,CHIA,FNDC1,ITLN1,CO…
		Population	tf	FDR	Category description	Genes
		LWK	UNION	0.0012720000	ER_to_Golgi_transport_vesicle_membrane	HLA-DPB1,HLA-DPA1,HLA-DRB1,HLA-DRB5,HLA-F,HLA-G,HLA-B,HLA-C,HLA-DRA,HLA-DQB2,HLA-DQA2,HLA-DQA1
				0.0012720000	antigen_processing_and_presentation	HLA-DPB1,HLA-DPA1,HLA-DRB1,HLA-DRB5,PSMB9,HLA-F,HLA-G,HLA-B,HLA-C,HLA-DRA,HLA-DQB1,HLA-DQB2,HLA-DQA2,HLA-DQA1
				0.0012720000	antigen_processing_and_presentation_of_endogenous_peptide_antigen_via_MHC_class_I	TAP1,TAP2,ERAP1,ERAP2
				0.0012720000	integral_to_lumenal_side_of_endoplasmic_reticulum_membrane	HLA-DPB1,HLA-DPA1,HLA-DRB1,HLA-DRB5,HLA-F,HLA-G,HLA-B,HLA-C,HLA-DRA,HLA-DQB2,HLA-DQA2,HLA-DQA1
				0.0012720000	integral_to_plasma_membrane	SLCO1B3,RAMP3,TEK,SLC2A9,RAMP1,PTPRK,PTPRM,PTPRO,GRID2,PTPRB,SLC15A2,PTPRD,EMR1,CORIN,LGR5,ROR2,STX8,GLRA3,ADAM29,TMPRSS11E,TMPRSS11F,GOLM1,NRG3,DSCAM,NRG1,ASIC2,GABRB3,SLC17A5,ABCC2,ALK,SLC28A1,HLA-DPA1,CMKLR1,FLT1,FLT3,NCMAP,ADCY9,MSR1,ART3,ANK2,ANKH,PCDHA11,PCDHA10,SDC2,FLRT2,FCER2,NOTCH4,PTPRN2,PERP,PTGER3,GPC5,GPC6,ADCY3,FLVCR1,KCNMB3,SLC6A1,GRIK2,GRIK4,CHRM5,KCNH5,CHRM3,SCNN1G,GRIN2A,CNR2,H…
				0.0012720000	interferon_gamma_mediated_signaling_pathway	SP100,HLA-DPB1,HLA-DPA1,HLA-DRB1,HLA-DRB5,IRF1,HLA-F,HLA-G,HLA-B,HLA-C,HLA-DRA,HLA-DQB2,HLA-DQA2,HLA-DQA1
				0.0012720000	extracellular_region	LIPC,ITIH5,TEK,CDA,PCSK9,CORIN,CELA3B,IGFBP7,SPINK14,WFDC8,RNASE11,SPP2,VEGFC,IGSF21,CPA5,EPDR1,FSTL4,ADAM28,TMPRSS11E,TMPRSS11F,NRG3,ANGPT2,DSCAM,ANGPT1,NRG1,NXPH1,HPSE,CXCL11,LAMA2,LAMA1,CPE,PRB2,HHLA1,PAMR1,VWF,LAMC2,LAMC1,ERBB4,NTN1,SERPINA5,REG4,EYS,IL1RL1,THSD7A,PCDHA10,FCER2,NMS,COL4A1,COL4A4,COL4A3,PDGFD,NRP1,NOTCH4,ADAM12,NOV,PCDH15,TREML4,LRCH3,NPNT,PRLR,F13A1,COL24A1,MMP2,FBN2,OVCH1,HS…
				0.0012720000	immune_response	PXDN,HLA-DPB1,CXCL11,HLA-DPA1,CMKLR1,MARCH1,HLA-DRB1,HLA-DRB5,IL1RL1,IL18R1,CNR2,HLA-F,HLA-G,HLA-B,HLA-C,CHIA,IL1R2,COLEC12,HLA-DRA,ENPP1,HLA-DQB1,HLA-DQB2,TRIM22,OPRK1,HLA-DQA2,HLA-DQA1,FYB,TLR10,VAV1,FAM65C,CCL26,TNFSF10,CD96,DEFB1,IL1F10
				0.0012720000	peptide_antigen_binding	HLA-DRB1,HLA-F,HLA-G,HLA-B,HLA-C,TAP1,TAP2,SLC7A5
				0.0012720000	clathrin_coated_endocytic_vesicle_membrane	HLA-DPB1,HLA-DPA1,HLA-DRB1,HLA-DRB5,HLA-DRA,HLA-DQB2,HLA-DQA2,HLA-DQA1
				0.0012720000	transport_vesicle_membrane	RAB11FIP5,HLA-DPB1,CPE,HLA-DPA1,HLA-DRB1,HLA-DRB5,ICA1,PTPRN2,HLA-DRA,HLA-DQB2,HLA-DQA2,HLA-DQA1
				0.0012720000	MHC_class_II_protein_complex	HLA-DPB1,HLA-DPA1,HLA-DRB1,HLA-DRB5,HLA-DRA,HLA-DQB1,HLA-DQB2,HLA-DQA2,HLA-DQA1
				0.0012720000	MHC_class_I_protein_complex	HLA-F,HLA-G,HLA-B,HLA-C
				0.0012720000	MHC_class_II_receptor_activity	HLA-DPA1,HLA-DRB1,HLA-DRA,HLA-DQB2,HLA-DQA2,HLA-DQA1
				0.0012720000	antigen_processing_and_presentation_of_peptide_or_polysaccharide_antigen_via_MHC_class_II	HLA-DPB1,HLA-DPA1,HLA-DRA,HLA-DQB1,HLA-DQB2,HLA-DQA1
				0.0025193750	keratin_filament	KRTAP10-5,KRTAP10-7,KRT14,KRT6A,KRT84,KRT83,KRTAP3-2,KRTAP3-3
				0.0032415789	positive_regulation_of_T_cell_mediated_cytotoxicity	HLA-F,HLA-G,HLA-B,HLA-C,TAP1,TAP2
				0.0032415789	trans_Golgi_network_membrane	LGR5,HLA-DPB1,HLA-DPA1,MARCH1,HLA-DRB1,HLA-DRB5,CALN1,HLA-DRA,HLA-DQB2,HLA-DQA2,HLA-DQA1
				0.0032415789	antigen_processing_and_presentation_of_exogenous_peptide_antigen_via_MHC_class_I_TAP_independent	HLA-F,HLA-G,HLA-B,HLA-C
				0.0262120000	antigen_processing_and_presentation_of_exogenous_peptide_antigen_via_MHC_class_I_TAP_dependent	NCF2,PSMB9,PSMC1,HLA-F,HLA-G,HLA-B,HLA-C,TAP1,TAP2,CD36
				0.0434866667	integral_to_membrane	SLCO1B3,XXYLT1,SLC39A11,GLIPR1L2,RAMP3,FAT2,SLC2A9,SV2C,ZPLD1,RAMP1,PLXNA4,ATP2C2,SLC37A1,SLCO1B7,PTPRK,PTPRO,PTPRQ,GRID2,LPPR1,PTPRT,PCSK5,SHISA2,MS4A12,TMC2,SLC2A5,AVL9,SLC15A2,PGBD5,PKHD1,EMR1,CORIN,LGR5,EVC2,SLC24A4,JPH2,PIGG,FFAR4,MGAT1,CACNA1A,CACNA1C,MINOS1,EGFR,SLC30A10,CNTNAP2,DSC1,RGSL1,FRMD3,CNTNAP4,CNTNAP5,GLRA3,HHAT,SIGLEC14,SLC19A3,SLCO5A1,ADAM28,YIPF7,BNIP3L,LHFPL2,LHFPL3,SLC25A21,…

## Sheet: LWK_signif_no_HLA
		Population	tf	FDR	Category description	Genes
		LWK	0.5	0.0199100000	antigen_processing_and_presentation_of_endogenous_peptide_antigen_via_MHC_class_I	TAP1,TAP2,ERAP1,ERAP2
				0.0201950000	extracellular_region	LIPC,ITIH5,TEK,CDA,PCSK9,CORIN,CELA3B,IGFBP7,SPINK14,WFDC8,RNASE11,SPP2,IGSF21,CPA5,FSTL4,ADAM28,TMPRSS11E,NRG3,ANGPT2,DSCAM,ANGPT1,NRG1,NXPH1,HPSE,CXCL11,LAMA2,LAMA1,CPE,PRB2,HHLA1,VWF,LAMC2,ERBB4,NTN1,SERPINA5,REG4,EYS,IL1RL1,THSD7A,PCDHA10,FCER2,NMS,COL4A1,COL4A4,COL4A3,NOV,PCDH15,LRCH3,NPNT,F13A1,COL24A1,MMP2,FBN2,OVCH1,HS3ST4,PSAPL1,PLEK,ST6GAL1,TSPEAR,NELL1,PGLYRP4,ACTN1,CHIA,FNDC1,ITLN1,CO…

## Sheet: LWK_outliers
		Population	tf	FDR	Category description	Genes
		LWK	0.5	0.0008955556	antigen_processing_and_presentation_of_exogenous_peptide_antigen_via_MHC_class_I_TAP_independent	HLA-G,HLA-B,HLA-C
				0.0008955556	interferon_gamma_mediated_signaling_pathway	HLA-DPB1,HLA-DQB2,HLA-G,HLA-B,HLA-C,HLA-DPA1,HLA-DRB1,HLA-DRB5,HLA-DQA2,HLA-DQA1
				0.0008955556	cytokine_mediated_signaling_pathway	HLA-DPB1,HLA-DQB2,HLA-G,HLA-B,HLA-C,HLA-DPA1,HLA-DRB1,HLA-DRB5,HLA-DQA2,HLA-DQA1
				0.0008955556	immune_response	ENPP1,HLA-DPB1,HLA-DQB1,HLA-DQB2,HLA-G,HLA-B,HLA-C,HLA-DPA1,HLA-DRB1,HLA-DRB5,HLA-DQA2,HLA-DQA1
				0.0008955556	peptide_antigen_binding	HLA-G,HLA-B,HLA-C,HLA-DRB1
				0.0008955556	clathrin_coated_endocytic_vesicle_membrane	HLA-DPB1,HLA-DQB2,HLA-DPA1,HLA-DRB1,HLA-DRB5,HLA-DQA2,HLA-DQA1
				0.0008955556	antigen_processing_and_presentation	HLA-DPB1,HLA-DQB1,HLA-DQB2,HLA-G,HLA-B,HLA-C,HLA-DPA1,HLA-DRB1,HLA-DRB5,HLA-DQA2,HLA-DQA1
				0.0008955556	endocytic_vesicle_membrane	HLA-DPB1,HLA-DQB2,HLA-DPA1,HLA-DRB1,HLA-DRB5,HLA-DQA2,HLA-DQA1
				0.0008955556	transport_vesicle_membrane	HLA-DPB1,HLA-DQB2,CPE,HLA-DPA1,HLA-DRB1,HLA-DRB5,HLA-DQA2,HLA-DQA1
				0.0008955556	MHC_class_II_protein_complex	HLA-DPB1,HLA-DQB1,HLA-DQB2,HLA-DPA1,HLA-DRB1,HLA-DRB5,HLA-DQA2,HLA-DQA1
				0.0008955556	MHC_class_I_protein_complex	HLA-G,HLA-B,HLA-C
				0.0008955556	trans_Golgi_network_membrane	HLA-DPB1,HLA-DQB2,HLA-DPA1,HLA-DRB1,HLA-DRB5,HLA-DQA2,HLA-DQA1
				0.0008955556	ER_to_Golgi_transport_vesicle_membrane	HLA-DPB1,HLA-DQB2,HLA-G,HLA-B,HLA-C,HLA-DPA1,HLA-DRB1,HLA-DRB5,HLA-DQA2,HLA-DQA1
				0.0008955556	MHC_class_II_receptor_activity	HLA-DQB2,HLA-DPA1,HLA-DRB1,HLA-DQA2,HLA-DQA1
				0.0008955556	integral_to_lumenal_side_of_endoplasmic_reticulum_membrane	HLA-DPB1,HLA-DQB2,HLA-G,HLA-B,HLA-C,HLA-DPA1,HLA-DRB1,HLA-DRB5,HLA-DQA2,HLA-DQA1
				0.0008955556	T_cell_receptor_signaling_pathway	HLA-DPB1,HLA-DQB2,HLA-DPA1,HLA-DRB1,HLA-DRB5,HLA-DQA2,HLA-DQA1
				0.0008955556	T_cell_costimulation	HLA-DPB1,HLA-DQB2,HLA-DPA1,LGALS8,HLA-DRB1,HLA-DRB5,HLA-DQA2,HLA-DQA1
				0.0008955556	antigen_processing_and_presentation_of_peptide_or_polysaccharide_antigen_via_MHC_class_II	HLA-DPB1,HLA-DQB1,HLA-DQB2,HLA-DPA1,HLA-DQA1
				0.0017373684	antigen_processing_and_presentation_of_exogenous_peptide_antigen_via_MHC_class_II	HLA-DPB1,HLA-DQB2,HLA-DPA1,HLA-DRB1,HLA-DRB5,HLA-DQA2,HLA-DQA1
				0.0025315000	lysosomal_membrane	ENPP1,HLA-DPB1,SLC17A5,HLA-DQB2,HLA-DPA1,HLA-DRB1,GPR137B,HLA-DRB5,HLA-DQA2,HLA-DQA1
				0.0032290476	positive_regulation_of_T_cell_mediated_cytotoxicity	HLA-G,HLA-B,HLA-C
				0.0187018182	phagocytic_vesicle_membrane	DMBT1,HLA-G,HLA-B,HLA-C
				0.0221652174	antigen_processing_and_presentation_of_exogenous_peptide_antigen_via_MHC_class_I_TAP_dependent	PSMC1,HLA-G,HLA-B,HLA-C
				0.0281687500	antigen_processing_and_presentation_of_exogenous_peptide_antigen_via_MHC_class_I	PSMC1,HLA-G,HLA-B,HLA-C
		LWK	0.4	0.0008270000	antigen_processing_and_presentation_of_exogenous_peptide_antigen_via_MHC_class_I_TAP_independent	HLA-G,HLA-B,HLA-C
				0.0008270000	lysosomal_membrane	ENPP1,HLA-DPB1,SLC17A5,HLA-DQB2,HLA-DPA1,HLA-DRB1,GPR137B,HLA-DRB5,HLA-DRA,HLA-DQA2,HLA-DQA1
				0.0008270000	interferon_gamma_mediated_signaling_pathway	HLA-DPB1,HLA-DQB2,HLA-G,HLA-B,HLA-C,HLA-DPA1,HLA-DRB1,HLA-DRB5,HLA-DRA,HLA-DQA2,HLA-DQA1
				0.0008270000	cytokine_mediated_signaling_pathway	HLA-DPB1,HLA-DQB2,HLA-G,HLA-B,HLA-C,HLA-DPA1,HLA-DRB1,HLA-DRB5,HLA-DRA,HLA-DQA2,HLA-DQA1
				0.0008270000	immune_response	ENPP1,HLA-DPB1,HLA-DQB1,HLA-DQB2,HLA-G,HLA-B,HLA-C,HLA-DPA1,HLA-DRB1,HLA-DRB5,HLA-DRA,HLA-DQA2,HLA-DQA1
				0.0008270000	peptide_antigen_binding	HLA-G,HLA-B,HLA-C,HLA-DRB1
				0.0008270000	clathrin_coated_endocytic_vesicle_membrane	HLA-DPB1,HLA-DQB2,HLA-DPA1,HLA-DRB1,HLA-DRB5,HLA-DRA,HLA-DQA2,HLA-DQA1
				0.0008270000	antigen_processing_and_presentation	HLA-DPB1,HLA-DQB1,HLA-DQB2,HLA-G,HLA-B,HLA-C,HLA-DPA1,HLA-DRB1,HLA-DRB5,HLA-DRA,HLA-DQA2,HLA-DQA1
				0.0008270000	antigen_processing_and_presentation_of_exogenous_peptide_antigen_via_MHC_class_II	HLA-DPB1,HLA-DQB2,HLA-DPA1,HLA-DRB1,HLA-DRB5,HLA-DRA,HLA-DQA2,HLA-DQA1
				0.0008270000	endocytic_vesicle_membrane	HLA-DPB1,HLA-DQB2,HLA-DPA1,HLA-DRB1,HLA-DRB5,HLA-DRA,HLA-DQA2,HLA-DQA1
				0.0008270000	transport_vesicle_membrane	HLA-DPB1,HLA-DQB2,CPE,HLA-DPA1,HLA-DRB1,HLA-DRB5,HLA-DRA,HLA-DQA2,HLA-DQA1
				0.0008270000	MHC_class_II_protein_complex	HLA-DPB1,HLA-DQB1,HLA-DQB2,HLA-DPA1,HLA-DRB1,HLA-DRB5,HLA-DRA,HLA-DQA2,HLA-DQA1
				0.0008270000	MHC_class_I_protein_complex	HLA-G,HLA-B,HLA-C
				0.0008270000	trans_Golgi_network_membrane	HLA-DPB1,HLA-DQB2,HLA-DPA1,HLA-DRB1,HLA-DRB5,HLA-DRA,HLA-DQA2,HLA-DQA1
				0.0008270000	ER_to_Golgi_transport_vesicle_membrane	HLA-DPB1,HLA-DQB2,HLA-G,HLA-B,HLA-C,HLA-DPA1,HLA-DRB1,HLA-DRB5,HLA-DRA,HLA-DQA2,HLA-DQA1
				0.0008270000	MHC_class_II_receptor_activity	HLA-DQB2,HLA-DPA1,HLA-DRB1,HLA-DRA,HLA-DQA2,HLA-DQA1
				0.0008270000	integral_to_lumenal_side_of_endoplasmic_reticulum_membrane	HLA-DPB1,HLA-DQB2,HLA-G,HLA-B,HLA-C,HLA-DPA1,HLA-DRB1,HLA-DRB5,HLA-DRA,HLA-DQA2,HLA-DQA1
				0.0008270000	T_cell_receptor_signaling_pathway	HLA-DPB1,HLA-DQB2,HLA-DPA1,HLA-DRB1,HLA-DRB5,HLA-DRA,HLA-DQA2,HLA-DQA1
				0.0008270000	T_cell_costimulation	HLA-DPB1,HLA-DQB2,HLA-DPA1,LGALS8,HLA-DRB1,HLA-DRB5,HLA-DRA,HLA-DQA2,HLA-DQA1
				0.0008270000	antigen_processing_and_presentation_of_peptide_or_polysaccharide_antigen_via_MHC_class_II	HLA-DPB1,HLA-DQB1,HLA-DQB2,HLA-DPA1,HLA-DRA,HLA-DQA1
				0.0032500000	positive_regulation_of_T_cell_mediated_cytotoxicity	HLA-G,HLA-B,HLA-C
				0.0116177273	phagocytic_vesicle_membrane	DMBT1,HLA-G,HLA-B,HLA-C
				0.0206752174	Golgi_membrane	HLA-DPB1,HLA-DQB2,HLA-G,ST6GAL1,HLA-B,HLA-C,HLA-DPA1,PDGFD,HLA-DRB1,HLA-DRB5,HLA-DRA,HLA-DQA2,HLA-DQA1,CHST11
		LWK	0.3	0.0007395238	antigen_processing_and_presentation_of_exogenous_peptide_antigen_via_MHC_class_I_TAP_independent	HLA-F,HLA-G,HLA-B,HLA-C
				0.0007395238	interferon_gamma_mediated_signaling_pathway	HLA-DPB1,HLA-DQB2,HLA-F,HLA-G,HLA-B,HLA-C,HLA-DPA1,HLA-DRB1,HLA-DRB5,HLA-DRA,HLA-DQA2,HLA-DQA1
				0.0007395238	type_I_interferon_signaling_pathway	HLA-F,HLA-G,HLA-B,HLA-C
				0.0007395238	cytokine_mediated_signaling_pathway	HLA-DPB1,HLA-DQB2,HLA-F,HLA-G,HLA-B,HLA-C,HLA-DPA1,HLA-DRB1,HLA-DRB5,HLA-DRA,HLA-DQA2,HLA-DQA1
				0.0007395238	immune_response	IL18R1,IL1RL1,HLA-DPB1,HLA-DQB1,HLA-DQB2,CXCL11,HLA-F,HLA-G,HLA-B,HLA-C,HLA-DPA1,HLA-DRB1,HLA-DRB5,HLA-DRA,HLA-DQA2,HLA-DQA1
				0.0007395238	peptide_antigen_binding	HLA-F,HLA-G,HLA-B,HLA-C,HLA-DRB1
				0.0007395238	clathrin_coated_endocytic_vesicle_membrane	HLA-DPB1,HLA-DQB2,HLA-DPA1,HLA-DRB1,HLA-DRB5,HLA-DRA,HLA-DQA2,HLA-DQA1
				0.0007395238	antigen_processing_and_presentation	HLA-DPB1,HLA-DQB1,HLA-DQB2,HLA-F,HLA-G,HLA-B,HLA-C,HLA-DPA1,HLA-DRB1,HLA-DRB5,HLA-DRA,HLA-DQA2,HLA-DQA1
				0.0007395238	antigen_processing_and_presentation_of_exogenous_peptide_antigen_via_MHC_class_II	HLA-DPB1,HLA-DQB2,DYNC2H1,HLA-DPA1,HLA-DRB1,HLA-DRB5,HLA-DRA,HLA-DQA2,HLA-DQA1
				0.0007395238	endocytic_vesicle_membrane	HLA-DPB1,HLA-DQB2,HLA-DPA1,HLA-DRB1,HLA-DRB5,HLA-DRA,HLA-DQA2,HLA-DQA1
				0.0007395238	transport_vesicle_membrane	HLA-DPB1,HLA-DQB2,CPE,HLA-DPA1,HLA-DRB1,HLA-DRB5,HLA-DRA,HLA-DQA2,HLA-DQA1
				0.0007395238	MHC_class_II_protein_complex	HLA-DPB1,HLA-DQB1,HLA-DQB2,HLA-DPA1,HLA-DRB1,HLA-DRB5,HLA-DRA,HLA-DQA2,HLA-DQA1
				0.0007395238	MHC_class_I_protein_complex	HLA-F,HLA-G,HLA-B,HLA-C
				0.0007395238	positive_regulation_of_T_cell_mediated_cytotoxicity	HLA-F,HLA-G,HLA-B,HLA-C
				0.0007395238	trans_Golgi_network_membrane	HLA-DPB1,HLA-DQB2,HLA-DPA1,HLA-DRB1,HLA-DRB5,HLA-DRA,HLA-DQA2,HLA-DQA1
				0.0007395238	ER_to_Golgi_transport_vesicle_membrane	HLA-DPB1,HLA-DQB2,HLA-F,HLA-G,HLA-B,HLA-C,HLA-DPA1,HLA-DRB1,HLA-DRB5,HLA-DRA,HLA-DQA2,HLA-DQA1
				0.0007395238	MHC_class_II_receptor_activity	HLA-DQB2,HLA-DPA1,HLA-DRB1,HLA-DRA,HLA-DQA2,HLA-DQA1
				0.0007395238	integral_to_lumenal_side_of_endoplasmic_reticulum_membrane	HLA-DPB1,HLA-DQB2,HLA-F,HLA-G,HLA-B,HLA-C,HLA-DPA1,HLA-DRB1,HLA-DRB5,HLA-DRA,HLA-DQA2,HLA-DQA1
				0.0007395238	T_cell_receptor_signaling_pathway	HLA-DPB1,HLA-DQB2,HLA-DPA1,HLA-DRB1,HLA-DRB5,HLA-DRA,HLA-DQA2,HLA-DQA1
				0.0007395238	T_cell_costimulation	HLA-DPB1,HLA-DQB2,HLA-DPA1,LGALS8,HLA-DRB1,HLA-DRB5,HLA-DRA,HLA-DQA2,HLA-DQA1
				0.0007395238	antigen_processing_and_presentation_of_peptide_or_polysaccharide_antigen_via_MHC_class_II	HLA-DPB1,HLA-DQB1,HLA-DQB2,HLA-DPA1,HLA-DRA,HLA-DQA1
				0.0038450000	negative_regulation_of_interferon_gamma_production	IL1RL1,HLA-DRB1,PGLYRP4
				0.0044652174	lysosomal_membrane	HLA-DPB1,HLA-DQB2,TLDC1,HLA-DPA1,HLA-DRB1,HLA-DRB5,HLA-DRA,HLA-DQA2,HLA-DQA1
				0.0097091667	phagocytic_vesicle_membrane	HLA-F,HLA-G,HLA-B,HLA-C
				0.0123412000	antigen_processing_and_presentation_of_exogenous_peptide_antigen_via_MHC_class_I_TAP_dependent	HLA-F,HLA-G,HLA-B,HLA-C
				0.0126673077	sarcolemma	ANK3,ANK2,SLC27A6,DTNA,SNTG2,SGCG,SNTB1
				0.0178285185	antigen_processing_and_presentation_of_exogenous_peptide_antigen_via_MHC_class_I	HLA-F,HLA-G,HLA-B,HLA-C
				0.0198200000	regulation_of_cardiac_muscle_contraction_by_regulation_of_the_release_of_sequestered_calcium_ion	ANK2,GSTO1,RYR2,CASQ2
				0.0215072414	detection_of_bacterium	HLA-DRB1,PGLYRP4
				0.0303666667	regulation_of_immune_response	HLA-F,HLA-G,HLA-B,HLA-C
				0.0316151613	Golgi_membrane	HLA-DPB1,HLA-DQB2,HLA-F,HLA-G,HLA-B,HLA-C,HLA-DPA1,HLA-DRB1,HLA-DRB5,HLA-DRA,HLA-DQA2,HLA-DQA1,CHST11
				0.0434725000	antigen_processing_and_presentation_of_peptide_antigen_via_MHC_class_I	HLA-F,HLA-G,HLA-B,HLA-C
		Population	tf	FDR	Category description	Genes
		LWK	UNION	0.0010737500	antigen_processing_and_presentation_of_exogenous_peptide_antigen_via_MHC_class_I_TAP_independent	HLA-F,HLA-G,HLA-B,HLA-C
				0.0010737500	interferon_gamma_mediated_signaling_pathway	HLA-DRA,HLA-DPB1,HLA-DQB2,HLA-F,HLA-G,HLA-B,HLA-C,HLA-DPA1,HLA-DRB5,HLA-DQA1
				0.0010737500	immune_response	IL1RL1,HLA-DRA,ENPP1,IL18R1,HLA-DPB1,HLA-DQB1,HLA-DQB2,CXCL11,HLA-F,HLA-G,HLA-B,HLA-C,HLA-DPA1,HLA-DRB5,HLA-DQA1
				0.0010737500	peptide_antigen_binding	HLA-F,HLA-G,HLA-B,HLA-C
				0.0010737500	clathrin_coated_endocytic_vesicle_membrane	HLA-DRA,HLA-DPB1,HLA-DQB2,HLA-DPA1,HLA-DRB5,HLA-DQA1
				0.0010737500	antigen_processing_and_presentation	HLA-DRA,HLA-DPB1,HLA-DQB1,HLA-DQB2,HLA-F,HLA-G,HLA-B,HLA-C,HLA-DPA1,HLA-DRB5,HLA-DQA1
				0.0010737500	transport_vesicle_membrane	HLA-DRA,HLA-DPB1,HLA-DQB2,CPE,HLA-DPA1,HLA-DRB5,HLA-DQA1
				0.0010737500	MHC_class_II_protein_complex	HLA-DRA,HLA-DPB1,HLA-DQB1,HLA-DQB2,HLA-DPA1,HLA-DRB5,HLA-DQA1
				0.0010737500	MHC_class_I_protein_complex	HLA-F,HLA-G,HLA-B,HLA-C
				0.0010737500	positive_regulation_of_T_cell_mediated_cytotoxicity	HLA-F,HLA-G,HLA-B,HLA-C
				0.0010737500	trans_Golgi_network_membrane	HLA-DRA,HLA-DPB1,HLA-DQB2,HLA-DPA1,HLA-DRB5,HLA-DQA1
				0.0010737500	ER_to_Golgi_transport_vesicle_membrane	HLA-DRA,HLA-DPB1,HLA-DQB2,HLA-F,HLA-G,HLA-B,HLA-C,HLA-DPA1,HLA-DRB5,HLA-DQA1
				0.0010737500	MHC_class_II_receptor_activity	HLA-DRA,HLA-DQB2,HLA-DPA1,HLA-DQA1
				0.0010737500	integral_to_lumenal_side_of_endoplasmic_reticulum_membrane	HLA-DRA,HLA-DPB1,HLA-DQB2,HLA-F,HLA-G,HLA-B,HLA-C,HLA-DPA1,HLA-DRB5,HLA-DQA1
				0.0010737500	T_cell_costimulation	HLA-DRA,HLA-DPB1,HLA-DQB2,HLA-DPA1,LGALS8,HLA-DRB5,HLA-DQA1
				0.0010737500	antigen_processing_and_presentation_of_peptide_or_polysaccharide_antigen_via_MHC_class_II	HLA-DRA,HLA-DPB1,HLA-DQB1,HLA-DQB2,HLA-DPA1,HLA-DQA1
				0.0030723529	cytokine_mediated_signaling_pathway	HLA-DRA,HLA-DPB1,HLA-DQB2,HLA-F,HLA-G,HLA-B,HLA-C,HLA-DPA1,HLA-DRB5,HLA-DQA1
				0.0036873684	antigen_processing_and_presentation_of_exogenous_peptide_antigen_via_MHC_class_I_TAP_dependent	PSMC1,HLA-F,HLA-G,HLA-B,HLA-C
				0.0036873684	phagocytic_vesicle_membrane	DMBT1,HLA-F,HLA-G,HLA-B,HLA-C
				0.0054165000	antigen_processing_and_presentation_of_exogenous_peptide_antigen_via_MHC_class_II	HLA-DRA,HLA-DPB1,HLA-DQB2,DYNC2H1,HLA-DPA1,HLA-DRB5,HLA-DQA1
				0.0068790476	antigen_processing_and_presentation_of_exogenous_peptide_antigen_via_MHC_class_I	PSMC1,HLA-F,HLA-G,HLA-B,HLA-C
				0.0135777273	endocytic_vesicle_membrane	HLA-DRA,HLA-DPB1,HLA-DQB2,HLA-DPA1,HLA-DRB5,HLA-DQA1
				0.0174091304	type_I_interferon_signaling_pathway	HLA-F,HLA-G,HLA-B,HLA-C
				0.0277629167	lysosomal_membrane	TLDC1,GPR137B,HLA-DRA,ENPP1,HLA-DPB1,SLC17A5,HLA-DQB2,HLA-DPA1,HLA-DRB5,HLA-DQA1
				0.0356260000	antigen_processing_and_presentation_of_peptide_antigen_via_MHC_class_I	PSMC1,HLA-F,HLA-G,HLA-B,HLA-C

## Sheet: LWK_outliers_no-HLA
		Population	tf	FDR	Category description	Genes
		no significant categories

## Sheet: TSI_signif
		Population	tf	FDR	Category description	Genes
		TSI	0.5	0.0018263636	integral_to_membrane	SLC39A11,GLIPR1L2,SLC39A14,RAMP3,FAT3,FAT2,SLC2A9,SLC26A3,SLCO1C1,ZPLD1,CRHR1,ATP2C2,SLC39A8,PTPRQ,GRID1,GRID2,LPPR1,MS4A12,SLC2A8,AVL9,SLC15A2,PGBD5,PKHD1,EMR1,LGR6,PIGN,CLSTN2,SLC24A4,JPH2,CACNA1A,CACNA1C,SLC30A10,CNTNAP2,DSC1,RGSL1,FRMD3,IZUMO1,CNTNAP4,CNTNAP5,HHAT,SLC19A3,NDFIP1,YIPF7,LHFPL2,FAM134B,HLA-DPB1,SLC25A24,QRFPR,ACBD5,DSG1,FAM155A,LRP1B,PDE3A,GABRB3,KIAA0922,ABCB11,TMEM220,ACPP,CMT…
				0.0018263636	ER_to_Golgi_transport_vesicle_membrane	HLA-DPB1,HLA-DPA1,HLA-DRB1,HLA-DRB5,HLA-G,HLA-B,HLA-C,HLA-DRA,HLA-DQB2,HLA-DQA1
				0.0018263636	antigen_processing_and_presentation	HLA-DPB1,HLA-DPA1,HLA-DRB1,HLA-DRB5,HLA-G,HLA-B,HLA-C,HLA-DRA,CCDC67,HLA-DQB1,HLA-DQB2,HLA-DQA1
				0.0018263636	integral_to_lumenal_side_of_endoplasmic_reticulum_membrane	HLA-DPB1,HLA-DPA1,HLA-DRB1,HLA-DRB5,HLA-G,HLA-B,HLA-C,HLA-DRA,HLA-DQB2,HLA-DQA1
				0.0018263636	interferon_gamma_mediated_signaling_pathway	HLA-DPB1,HLA-DPA1,HLA-DRB1,HLA-DRB5,IRF1,HLA-G,HLA-B,HLA-C,HLA-DRA,HLA-DQB2,HLA-DQA1,OAS2,OAS1
				0.0018263636	extracellular_region	LIPK,TEK,IGFBP7,FCGBP,WFDC8,RNASE11,NDFIP1,TMPRSS11E,CPA3,NRG3,DSCAM,ANGPT1,FGF14,HPSE,UTS2B,CXCL11,ACPP,LAMA2,LAMA1,CPE,HHLA1,VWF,LAMC2,LAMC1,NTN1,SERPINA5,REG4,EYS,IL1RL1,KIRREL3,THSD7A,PCDHA10,FCER2,COL4A2,COL4A4,COL4A3,PDGFD,NOTCH4,ADAM12,ADAM11,PCDH15,FAS,CLCA2,F13A1,COL24A1,MMP2,OVCH1,HS3ST4,PLEK,PSAPL1,TSPEAR,C6ORF58,PRSS23,PNOC,CLEC3A,F5,PLA2R1,LYZL1,TMPRSS2,CNTN4,ADAMTS16,SVEP1,LTBP1,DMB…
				0.0018263636	immune_response	CRHR1,HLA-DPB1,CXCL11,HLA-DPA1,CMKLR1,HLA-DRB1,HLA-DRB5,IL1RL1,FAS,IL18R1,CNR2,HLA-G,HLA-B,HLA-C,NKX2-3,HLA-DRA,CCDC67,HLA-DQB1,HLA-DQB2,TRIM22,HLA-DQA1,SBSPON,ATP6V0A2,TNFSF10,CD96,OAS2,OAS1
				0.0018263636	clathrin_coated_endocytic_vesicle_membrane	SH3GL2,HLA-DPB1,HLA-DPA1,HLA-DRB1,HLA-DRB5,HLA-DRA,HLA-DQB2,HLA-DQA1
				0.0018263636	MHC_class_II_protein_complex	HLA-DPB1,HLA-DPA1,HLA-DRB1,HLA-DRB5,HLA-DRA,HLA-DQB1,HLA-DQB2,HLA-DQA1
				0.0018263636	MHC_class_II_receptor_activity	HLA-DPA1,HLA-DRB1,HLA-DRA,HLA-DQB2,HLA-DQA1
				0.0018263636	antigen_processing_and_presentation_of_peptide_or_polysaccharide_antigen_via_MHC_class_II	HLA-DPB1,HLA-DPA1,HLA-DRA,HLA-DQB1,HLA-DQB2,HLA-DQA1
				0.0033775000	trans_Golgi_network_membrane	LGR6,HLA-DPB1,HLA-DPA1,HLA-DRB1,HLA-DRB5,HLA-DRA,HLA-DQB2,HLA-DQA1,KIF13A,TMEM165
				0.0047869231	peptide_antigen_binding	HLA-DRB1,HLA-G,HLA-B,HLA-C,TAP2
				0.0138292857	positive_regulation_of_T_cell_mediated_cytotoxicity	HLA-G,HLA-B,HLA-C,P2RX7,TAP2
				0.0175920000	keratin_filament	KRT14,KRT6C,KRT83,KRT8,KRTAP5-5,KRTAP3-3
				0.0192593750	MHC_class_I_protein_complex	HLA-G,HLA-B,HLA-C
				0.0210383333	antigen_processing_and_presentation_of_endogenous_peptide_antigen_via_MHC_class_I	TAP2,ERAP1,ERAP2
				0.0210383333	transport_vesicle_membrane	HLA-DPB1,CPE,HLA-DPA1,HLA-DRB1,HLA-DRB5,HLA-DRA,HLA-DQB2,HLA-DQA1
				0.0298921053	type_I_interferon_signaling_pathway	IRF1,HLA-G,HLA-B,HLA-C,OAS2,OAS1,MX1
				0.0305735000	antigen_processing_and_presentation_of_exogenous_peptide_antigen_via_MHC_class_I_TAP_independent	HLA-G,HLA-B,HLA-C
				0.0312738095	integral_to_plasma_membrane	SLC39A14,RAMP3,TEK,SLC2A9,CRHR1,PTPRF,PTPRM,GRID2,SLC2A8,SLC15A2,PTPRD,EMR1,LGR6,ROR1,ADAM29,TMPRSS11E,NRG3,DSCAM,GABRB3,ABCB11,SLC28A1,HLA-DPA1,CMKLR1,ART3,ANK2,IL1RL2,PCDHA11,PCDHA10,FCER2,NOTCH4,PERP,PTGER3,SLC8A1,GPC5,GPC6,ADCY3,FLVCR1,CLCA2,KCNMB3,KCNMB2,GABRR1,SLC6A1,GRIK4,CAV2,CHRM2,KCNH7,SCNN1G,CNR2,HLA-B,GRM7,GRM8,CNGA3,P2RX7,MERTK,TRPM1,EPHA7,EPHB1,FAM47E-STBD1,ATP1A4,CLEC1B,PCDHAC1,PLA…
		TSI	0.4	0.0016216667	integral_to_membrane	XXYLT1,SLC39A11,GLIPR1L2,SLC39A14,RAMP3,FAT2,SLC2A9,SLCO1C1,ZPLD1,CRHR1,ATP2C2,SLC39A8,PTPRQ,GRID1,GRID2,LPPR1,PCSK5,MS4A12,SLC2A8,SLC2A1,SLC15A2,PGBD5,PKHD1,EMR2,EMR1,PIGN,CLSTN2,SLC24A4,JPH2,CACNA1G,CACNA1A,CACNA1C,SLC30A10,CNTNAP2,DSC1,SLC48A1,FRMD3,IZUMO1,CNTNAP4,CNTNAP5,GLRA3,HHAT,SIGLEC14,SLC19A3,NDFIP1,YIPF7,LHFPL2,FAM134B,HLA-DPB1,SLC25A21,SLC25A24,QRFPR,ACBD5,DSG1,LRP1B,PDE3A,ASIC2,TMEM1…
				0.0016216667	ER_to_Golgi_transport_vesicle_membrane	HLA-DPB1,HLA-DPA1,HLA-DRB1,HLA-DRB5,HLA-G,HLA-B,HLA-C,HLA-DRA,HLA-DQB2,HLA-DQA1
				0.0016216667	antigen_processing_and_presentation	HLA-DPB1,HLA-DPA1,HLA-DRB1,HLA-DRB5,HLA-G,HLA-B,HLA-C,HLA-DRA,CCDC67,HLA-DQB1,HLA-DQB2,HLA-DQA1
				0.0016216667	integral_to_lumenal_side_of_endoplasmic_reticulum_membrane	HLA-DPB1,HLA-DPA1,HLA-DRB1,HLA-DRB5,HLA-G,HLA-B,HLA-C,HLA-DRA,HLA-DQB2,HLA-DQA1
				0.0016216667	keratin_filament	KRT14,KRT6A,KRT83,KRT8,KRTAP5-5,KRTAP3-2,KRTAP3-3
				0.0016216667	interferon_gamma_mediated_signaling_pathway	HLA-DPB1,HLA-DPA1,HLA-DRB1,HLA-DRB5,IRF1,HLA-G,HLA-B,HLA-C,HLA-DRA,HLA-DQB2,HLA-DQA1,OAS2,OAS1
				0.0016216667	extracellular_region	LIPK,TEK,IGFBP7,FCGBP,WFDC8,RNASE11,NDFIP1,TMPRSS11E,CPA3,NRG3,DSCAM,ANGPT1,FGF14,NXPH1,HPSE,CXCL11,ACPP,LAMA2,LAMA1,CPE,HHLA1,VWF,LAMC2,LAMC1,NTN1,SERPINA5,REG4,EYS,IL1RL1,KIRREL3,THSD7A,PCDHA10,FCER2,COL4A2,COL4A4,COL4A3,CPN2,PDGFD,NOTCH4,ADAM12,ADAM11,PCDH15,CLCA2,NPNT,F13A1,COL24A1,MMP2,OVCH1,PRNT,HS3ST4,PLEK,PSAPL1,TSPEAR,NELL1,C6ORF58,PRSS23,PNOC,CLEC3A,F5,PLA2R1,TMPRSS2,CNTN4,ADAMTS16,SVEP…
				0.0016216667	immune_response	CRHR1,HLA-DPB1,CXCL11,HLA-DPA1,CMKLR1,HLA-DRB1,HLA-DRB5,IL1RL1,IL18R1,CNR2,HLA-G,HLA-B,HLA-C,HLA-DRA,CCDC67,HLA-DQB1,HLA-DQB2,TRIM22,HLA-DQA1,SBSPON,VAV1,ATP6V0A2,TNFSF10,CD96,OAS2,OAS1,IL1RN
				0.0016216667	clathrin_coated_endocytic_vesicle_membrane	SH3GL2,HLA-DPB1,HLA-DPA1,HLA-DRB1,HLA-DRB5,HLA-DRA,HLA-DQB2,HLA-DQA1
				0.0016216667	MHC_class_II_protein_complex	HLA-DPB1,HLA-DPA1,HLA-DRB1,HLA-DRB5,HLA-DRA,HLA-DQB1,HLA-DQB2,HLA-DQA1
				0.0016216667	MHC_class_II_receptor_activity	HLA-DPA1,HLA-DRB1,HLA-DRA,HLA-DQB2,HLA-DQA1
				0.0016216667	antigen_processing_and_presentation_of_peptide_or_polysaccharide_antigen_via_MHC_class_II	HLA-DPB1,HLA-DPA1,HLA-DRA,HLA-DQB1,HLA-DQB2,HLA-DQA1
				0.0031338462	leukotriene_B4_20_monooxygenase_activity	CYP4F2,CYP4F3,CYP4F12
				0.0040486667	peptide_antigen_binding	HLA-DRB1,HLA-G,HLA-B,HLA-C,TAP2
				0.0040486667	transport_vesicle_membrane	HLA-DPB1,CPE,HLA-DPA1,HLA-DRB1,HLA-DRB5,PTPRN2,HLA-DRA,HLA-DQB2,HLA-DQA1
				0.0065418750	trans_Golgi_network_membrane	HLA-DPB1,HLA-DPA1,HLA-DRB1,HLA-DRB5,RAB31,HLA-DRA,HLA-DQB2,HLA-DQA1,KIF13A,TMEM165
				0.0101417647	lysosomal_membrane	SLC2A8,SLC48A1,HLA-DPB1,HPSE,ACPP,HLA-DPA1,HLA-DRB1,HLA-DRB5,WDR41,LITAF,TMEM106B,CUBN,TLDC1,HLA-DRA,OCA2,DAB2,HLA-DQB2,GPLD1,HLA-DQA1,TMEM165,ATP6V0A4,ATP6V0A2,GPR137B,DRAM1,SCARB1,TMEM8A
				0.0119161111	positive_regulation_of_T_cell_mediated_cytotoxicity	HLA-G,HLA-B,HLA-C,P2RX7,TAP2
				0.0136794737	MHC_class_I_protein_complex	HLA-G,HLA-B,HLA-C
				0.0141390000	antigen_processing_and_presentation_of_endogenous_peptide_antigen_via_MHC_class_I	TAP2,ERAP1,ERAP2
				0.0213552381	antigen_processing_and_presentation_of_exogenous_peptide_antigen_via_MHC_class_I_TAP_independent	HLA-G,HLA-B,HLA-C
				0.0261631818	transmembrane_transport	SLC39A11,SLC39A14,SLC2A9,SLCO1C1,ATP2C2,SLC39A8,SLC2A8,SLC2A1,KCNQ3,SLC15A2,SLC24A4,KCNS3,CACNA1G,CACNA1A,CACNA1C,SLC30A10,GLRA3,SLC19A3,SLC25A21,SLC25A24,ASIC2,GABRB3,ABCB11,ABCC8,ABCC4,GABRG3,CYBRD1,CASQ2,NUP88,KCNA6,ANO3,ANO2,SLC8A1,ADCY5,ADCY2,ADCY3,SLC22A9,SLC5A12,GABRR1,SLC6A1,KCNH7,SCNN1G,HK1,SLC7A11,KCNK2,TRDN,CNGA3,TRPM3,SLC16A14,NEDD4L,SLC1A2,ATP1A4,SLC14A2,SLC27A6,MYO5B,SCN1A,ITPR3,ITP…
				0.0290891304	T_cell_costimulation	HLA-DPB1,HLA-DPA1,HLA-DRB1,HLA-DRB5,CD247,HLA-DRA,HLA-DQB2,LGALS8,HLA-DQA1,VAV1
				0.0364016667	phagocytic_vesicle_membrane	HLA-G,HLA-B,HLA-C,RAB31,DMBT1,ATP6V0A4,ATP6V0A2,ATP6V0E2
				0.0471600000	alkane_1_monooxygenase_activity	CYP4F2,CYP4F12
				0.0471600000	leukotriene_B4_catabolic_process	CYP4F2,CYP4F12
				0.0471600000	pressure_natriuresis	CYP4F2,CYP4F12
		TSI	0.3	0.0014992308	leukotriene_B4_20_monooxygenase_activity	CYP4F2,CYP4F3,CYP4F12
				0.0014992308	ER_to_Golgi_transport_vesicle_membrane	HLA-DPB1,HLA-DPA1,HLA-DRB1,HLA-DRB5,HLA-G,HLA-B,HLA-C,HLA-DRA,HLA-DQB2,HLA-DQA1
				0.0014992308	antigen_processing_and_presentation	HLA-DPB1,HLA-DPA1,HLA-DRB1,HLA-DRB5,HLA-G,HLA-B,HLA-C,HLA-DRA,HLA-DQB1,HLA-DQB2,HLA-DQA1
				0.0014992308	integral_to_lumenal_side_of_endoplasmic_reticulum_membrane	HLA-DPB1,HLA-DPA1,HLA-DRB1,HLA-DRB5,HLA-G,HLA-B,HLA-C,HLA-DRA,HLA-DQB2,HLA-DQA1
				0.0014992308	lysosomal_membrane	SLC2A8,SLC48A1,HLA-DPB1,HPSE,SLC17A5,ACPP,HLA-DPA1,HLA-DRB1,HLA-DRB5,ATP6V1E1,WDR11,LITAF,RAB12,TMEM106B,CUBN,TLDC1,HLA-DRA,DAB2,HLA-DQB2,GPLD1,HLA-DQA1,TMEM165,ATP6V0A4,TMEM192,GPR137B,DRAM1,SCARB1
				0.0014992308	interferon_gamma_mediated_signaling_pathway	SP100,HLA-DPB1,HLA-DPA1,HLA-DRB1,HLA-DRB5,IRF1,HLA-G,HLA-B,HLA-C,HLA-DRA,HLA-DQB2,HLA-DQA1,OAS1
				0.0014992308	extracellular_region	SFRP4,LIPK,DEFB127,TEK,ISM1,IGFBP7,FCGBP,WFDC8,RNASE11,TMPRSS11E,TNC,NRG3,ANGPT2,ANGPT1,NRG1,NXPH1,HPSE,CXCL11,ACPP,LAMA2,LAMA1,CPE,PRB2,HHLA1,VWF,SLIT3,SERPINA5,REG4,EYS,IL1RL1,ARSJ,KIRREL3,THSD7A,PCDHA10,FCER2,NMS,COL4A2,COL4A4,COL4A3,CPN2,PDGFD,NOTCH4,ADAM11,PCDH15,CLCA2,F13A1,COL24A1,MMP2,OVCH1,PLEK,PSAPL1,TSPEAR,NELL1,DKK2,C6ORF58,CHIA,IL1R1,FNDC1,C3,C7,PRSS23,REG3G,PNOC,CLEC3A,F5,PLA2R1,CRI…
				0.0014992308	immune_response	CRHR1,HLA-DPB1,CXCL11,HLA-DPA1,HLA-DRB1,HLA-DRB5,IL1RL1,IL18R1,CNR2,HLA-G,HLA-B,HLA-C,CHIA,IL1R1,C3,HLA-DRA,HLA-DQB1,HLA-DQB2,TRIM22,OPRK1,HLA-DQA1,SBSPON,VAV1,CD96,OAS1,IL7R,IL1RN
				0.0014992308	clathrin_coated_endocytic_vesicle_membrane	CD207,SH3GL2,HLA-DPB1,HLA-DPA1,HLA-DRB1,HLA-DRB5,HLA-DRA,HLA-DQB2,HLA-DQA1
				0.0014992308	transport_vesicle_membrane	HLA-DPB1,CPE,HLA-DPA1,HLA-DRB1,HLA-DRB5,PTPRN2,HLA-DRA,HLA-DQB2,HLA-DQA1
				0.0014992308	MHC_class_II_protein_complex	HLA-DPB1,HLA-DPA1,HLA-DRB1,HLA-DRB5,HLA-DRA,HLA-DQB1,HLA-DQB2,HLA-DQA1
				0.0014992308	MHC_class_II_receptor_activity	HLA-DPA1,HLA-DRB1,HLA-DRA,HLA-DQB2,HLA-DQA1
				0.0014992308	antigen_processing_and_presentation_of_peptide_or_polysaccharide_antigen_via_MHC_class_II	HLA-DPB1,HLA-DPA1,HLA-DRA,HLA-DQB1,HLA-DQB2,HLA-DQA1
				0.0075178571	peptide_antigen_binding	HLA-DRB1,HLA-G,HLA-B,HLA-C,TAP2
				0.0203733333	MHC_class_I_protein_complex	HLA-G,HLA-B,HLA-C
				0.0353956250	antigen_processing_and_presentation_of_exogenous_peptide_antigen_via_MHC_class_I_TAP_independent	HLA-G,HLA-B,HLA-C
		Population	tf	FDR	Category description	Genes
		TSI	UNION	0.0015776923	integral_to_membrane	SLCO1B1,XXYLT1,SOAT1,SLC39A11,ACSL1,GLIPR1L2,SLC39A14,RAMP3,FAT3,FAT2,CD207,SLC2A9,SLC26A3,SLCO1C1,ZPLD1,PLXNA4,CRHR1,ATP2C2,SLC39A8,PTPRQ,GRID1,GRID2,LPPR1,PCSK5,MS4A12,TMC2,SLC2A5,SLC2A8,SLC2A1,AVL9,SLC15A2,PGBD5,PKHD1,EMR2,EMR1,LGR6,PIGN,CLSTN2,SLC24A4,JPH2,MGAT1,CACNA1G,CACNA1A,CACNA1C,SLC30A10,CNTNAP2,TMEM63C,DSC1,RGSL1,SLC48A1,FRMD3,IZUMO1,CNTNAP4,CNTNAP5,GLRA3,HHAT,SIGLEC14,SLC19A3,ODF4,ND…
				0.0015776923	leukotriene_B4_20_monooxygenase_activity	CYP4F2,CYP4F3,CYP4F12
				0.0015776923	ER_to_Golgi_transport_vesicle_membrane	HLA-DPB1,HLA-DPA1,HLA-DRB1,HLA-DRB5,HLA-G,HLA-B,HLA-C,HLA-DRA,HLA-DQB2,HLA-DQA1
				0.0015776923	antigen_processing_and_presentation	HLA-DPB1,HLA-DPA1,HLA-DRB1,HLA-DRB5,HLA-G,HLA-B,HLA-C,HLA-DRA,CCDC67,HLA-DQB1,HLA-DQB2,HLA-DQA1
				0.0015776923	integral_to_lumenal_side_of_endoplasmic_reticulum_membrane	HLA-DPB1,HLA-DPA1,HLA-DRB1,HLA-DRB5,HLA-G,HLA-B,HLA-C,HLA-DRA,HLA-DQB2,HLA-DQA1
				0.0015776923	keratin_filament	KRTAP12-2,KRT14,KRT6A,KRT6C,KRT83,KRT8,KRTAP5-5,KRTAP3-2,KRTAP3-3
				0.0015776923	interferon_gamma_mediated_signaling_pathway	SP100,HLA-DPB1,HLA-DPA1,HLA-DRB1,HLA-DRB5,IRF1,HLA-G,HLA-B,HLA-C,HLA-DRA,HLA-DQB2,HLA-DQA1,OAS2,OAS1
				0.0015776923	extracellular_region	SFRP4,LIPK,DEFB127,TEK,ISM1,IGFBP7,FCGBP,WFDC8,RNASE11,NDFIP1,TMPRSS11E,TNC,CPA3,NRG3,ANGPT2,DSCAM,ANGPT1,NRG1,FGF14,NXPH1,HPSE,UTS2B,CXCL11,ACPP,LAMA2,LAMA1,CPE,PRB2,HHLA1,VWF,LAMC2,LAMC1,SLIT3,NTN1,SERPINA5,REG4,EYS,IL1RL1,ARSJ,KIRREL3,THSD7A,PCDHA10,FCER2,NMS,COL4A2,COL4A4,COL4A3,CPN2,PDGFD,NOTCH4,ADAM12,ADAM11,PCDH15,FAS,CLCA2,NPNT,F13A1,COL24A1,MMP2,OVCH1,PRNT,HS3ST4,PLEK,PSAPL1,TSPEAR,NELL1…
				0.0015776923	immune_response	CRHR1,HLA-DPB1,CXCL11,HLA-DPA1,CMKLR1,HLA-DRB1,HLA-DRB5,IL1RL1,FAS,IL18R1,CNR2,HLA-G,HLA-B,HLA-C,CHIA,IL1R1,C3,NKX2-3,HLA-DRA,CCDC67,HLA-DQB1,HLA-DQB2,TRIM22,OPRK1,HLA-DQA1,SBSPON,VAV1,ATP6V0A2,TNFSF10,CD96,OAS2,OAS1,IL7R,IL1RN
				0.0015776923	clathrin_coated_endocytic_vesicle_membrane	CD207,SH3GL2,HLA-DPB1,HLA-DPA1,HLA-DRB1,HLA-DRB5,HLA-DRA,HLA-DQB2,HLA-DQA1
				0.0015776923	MHC_class_II_protein_complex	HLA-DPB1,HLA-DPA1,HLA-DRB1,HLA-DRB5,HLA-DRA,HLA-DQB1,HLA-DQB2,HLA-DQA1
				0.0015776923	MHC_class_II_receptor_activity	HLA-DPA1,HLA-DRB1,HLA-DRA,HLA-DQB2,HLA-DQA1
				0.0015776923	antigen_processing_and_presentation_of_peptide_or_polysaccharide_antigen_via_MHC_class_II	HLA-DPB1,HLA-DPA1,HLA-DRA,HLA-DQB1,HLA-DQB2,HLA-DQA1
				0.0029171429	trans_Golgi_network_membrane	LGR6,HLA-DPB1,HLA-DPA1,HLA-DRB1,HLA-DRB5,RAB31,HLA-DRA,HLA-DQB2,HLA-DQA1,KIF13A,TMEM165
				0.0084960000	transmembrane_transport	SLCO1B1,SLC39A11,SLC39A14,SLC2A9,SLC26A3,SLCO1C1,ATP2C2,SLC39A8,SLC2A5,SLC2A8,SLC2A1,KCNQ3,SLC15A2,SLC24A4,KCNS3,CACNA1G,CACNA1A,CACNA1C,SLC30A10,GLRA3,SLC19A3,ABCG1,SLC25A21,SLC25A24,ASIC2,GABRB3,ABCB11,SLC17A5,ABCC8,ABCC4,GABRG3,SLC28A1,CYBRD1,CASQ2,NUP88,ATP6V1E1,KCNA6,ANO3,ANO2,KCNC4,SLC8A1,ADCY5,ADCY2,ADCY3,FLVCR1,SLC22A9,SLC5A12,SLC35B3,GABRR1,SLC6A1,KCNH7,KCNMA1,SCNN1G,HK1,SLC7A11,KCNK2,TR…
				0.0123881250	phagocytic_vesicle_membrane	HLA-G,HLA-B,HLA-C,RAB31,RAB20,IRGM,DMBT1,ATP6V0A4,ATP6V0A2,ATP6V0E2
				0.0155611765	transport_vesicle_membrane	HLA-DPB1,CPE,HLA-DPA1,HLA-DRB1,HLA-DRB5,PTPRN2,HLA-DRA,HLA-DQB2,HLA-DQA1
				0.0159188889	lysosomal_membrane	SLC2A8,SLC48A1,HLA-DPB1,HPSE,SLC17A5,ACPP,HLA-DPA1,HLA-DRB1,HLA-DRB5,ATP6V1E1,WDR41,WDR11,LITAF,RAB12,TMEM106B,CUBN,TLDC1,HLA-DRA,OCA2,DAB2,HLA-DQB2,GPLD1,HLA-DQA1,TMEM165,ATP6V0A4,ATP6V0A2,TMEM192,GPR137B,DRAM1,SCARB1,TMEM8A
				0.0236926316	peptide_antigen_binding	HLA-DRB1,HLA-G,HLA-B,HLA-C,TAP2
				0.0330185000	integral_to_plasma_membrane	SLCO1B1,SLC39A14,RAMP3,TEK,SLC2A9,CRHR1,PTPRF,PTPRM,GRID2,SLC2A8,PTPRB,SLC15A2,PTPRD,EMR1,LGR6,ROR1,GLRA3,ABCG1,ADAM29,TMPRSS11E,NRG3,DSCAM,NRG1,ASIC2,GABRB3,ABCB11,SLC17A5,ALK,SLC28A1,HLA-DPA1,CMKLR1,ART3,ANK2,IL1RL2,ANKH,PCDHA11,PCDHA10,SDC2,FCER2,NOTCH4,PTPRN2,PERP,PTGER3,SLC8A1,GPC5,GPC6,ADCY3,FLVCR1,CLCA2,KCNMB3,KCNMB2,GABRR1,SLC6A1,GRIK4,CAV2,CHRM2,KCNH7,SCNN1G,CNR2,HLA-B,GRM7,GRM8,ICAM3,CN…
				0.0342047619	positive_regulation_of_T_cell_mediated_cytotoxicity	HLA-G,HLA-B,HLA-C,P2RX7,TAP2
				0.0371581818	type_I_interferon_signaling_pathway	SP100,IRF1,HLA-G,HLA-B,HLA-C,OAS2,OAS1,MX1
				0.0378745833	antigen_processing_and_presentation_of_endogenous_peptide_antigen_via_MHC_class_I	TAP2,ERAP1,ERAP2
				0.0378745833	MHC_class_I_protein_complex	HLA-G,HLA-B,HLA-C

[truncated: 24 more sheets: TSI_signif_no_HLA, TSI_outliers, TSI_outliers_no-HLA, GBR_signif, GBR_signif_no_HLA, GBR_outliers, GBR_outliers_no-HLA, Sheet3, YRI_outliers (2), YRI_outliers_no-HLA (2), YRI_signif (2), YRI_signif_no-HLA, LWK_outliers (2), LWK_outliers_no-HLA (2), LWK_signif (2), LWK_signif_no-HLA, TSI_outliers (2), TSI_outliers_no-HLA (2), TSI_signif (2), TSI_signif_no-HLA …]
