# Supplementary material for: Signatures of Long-Term Balancing Selection in Human Genomes
Source: Genome Biol Evol. 2018 Mar 15;10(3):939–55. doi: 10.1093/gbe/evy054 (PMC5952967; doi:10.1093/gbe/evy054)
Supplement: Supplementary Materials [file evy054_supp.zip › S4_Table_GBE_revised.xlsx]

## Sheet: LEGEND
Legend
The first 6 sheets are lists of genes derived from outlier and significant sets of windows (see main text)
The remaining 4 sheets refer to candidate genes in Europe that overlap regions introgressed from Neanderthals (see supplementary material)

## Sheet: Afr_outliers
Chr	Acronym	tf.LWK	p.LWK	tf.YRI	p.YRI	tf.GBR	p.GBR	tf.TSI	p.TSI
11	LUZP2	0.3	1.32691e-05	0.3	2.23162e-05	0.3	0.00258988	0.3	0.00258988
8	MYOM2	0.4	3.0157e-05	0.5	2.95539e-05	0.3	0.000534985	0.3	0.000513876
4	POLN	0.5	6.27266e-05	0.5	5.12669e-05	0.3	0.0535341	0.3	0.00144452
12	PTPRB	0.5	7.11706e-05	0.5	0.000141135	0.3	0.00143789	0.3	0.000600125
3	FRMD4B	0.3	7.17737e-05	0.5	6.75517e-05	0.3	0.000285285	0.3	0.00201147
5	SV2C	0.5	7.23768e-05	0.5	8.80585e-05	0.5	0.00682212	0.5	0.00640354
3	EPHA6	0.5	8.20271e-05	0.3	0.000153801	0.3	0.00572199	0.3	0.000469846
11	PTS	0.5	8.44396e-05	0.5	6.27266e-05	0.3	0.000208687	0.3	0.00102353
19	ZNF441	0.5	9.4693e-05	0.5	0.000109168	0.5	0.00285647	0.5	0.00204465
12	TMEM132D	0.3	0.000110375	0.5	0.000489147	0.3	0.000715324	0.5	0.0011713
18	DTNA	0.3	0.000115803	0.3	0.000243066	0.3	0.00556518	0.3	0.00127866
3	SPATA16	0.3	0.000117009	0.4	8.98679e-05	0.3	0.0239459	0.3	0.0203089
15	C15orf48	0.3	0.000120628	0.5	4.94575e-05	0.3	0.419699	0.3	0.224465			opposite signatures in Afr and Eur
4	IGFBP7	0.3	0.000122437	0.3	5.85046e-05	0.3	0.000247288	0.3	0.000558508
11	OR5P2	0.5	0.000127263	0.3	0.000366106	0.4	0.000483719	0.3	0.000564539			p<0.0005 for the population (only for those not included in the set)
14	STXBP6	0.5	0.000129675	0.5	0.000156816	0.3	0.00164959	0.3	0.000109772
3	CLDN16	0.3	0.000141738	0.3	0.000196021	0.3	0.0159959	0.3	0.011216
1	NFASC	0.5	0.000141738	0.3	0.000316046	0.3	0.00172438	0.3	0.00265442
10	ANK3	0.5	0.000162848	0.3	0.000381185	0.3	0.000740053	0.3	0.000457783
6	SLC17A5	0.5	0.000164657	0.4	0.000115803	0.5	0.00460739	0.3	0.00352596
7	GTF2IRD1	0.3	0.000168276	0.3	7.05674e-05	0.3	0.0712273	0.5	0.0689607
1	ABCA4	0.3	0.000168879	0.3	0.000164657	0.3	0.0107685	0.5	0.0139977
14	SLC24A4	0.5	0.000174308	0.5	0.000237637	0.3	0.000994578	0.3	0.000589871
3	CLDN11	0.3	0.00018637	0.3	0.000250906	0.3	0.0026502	0.3	0.002266
1	LGALS8	0.4	0.000189386	0.5	0.000367312	0.3	0.000534382	0.5	0.000285285
5	NR3C1	0.3	0.000203861	0.3	0.000183958	0.3	0.000584443	0.3	0.000215321
6	PDE10A	0.5	0.00020929	0.5	0.000140532	0.3	0.00164235	0.3	0.00167432
14	ATXN3	0.5	0.000211702	0.5	0.000419786	0.3	0.000537398	0.3	0.00040712
16	CDYL2	0.3	0.000215924	0.3	0.000334743	0.3	0.00991563	0.3	0.00571234
6	HLA-F	0.3	0.000217734	0.3	0.000153198	0.3	0.00060314	0.3	0.00192764
6	AIM1	0.5	0.000227987	0.5	0.00011339	0.3	0.00131907	0.4	0.000345599
11	HBE1	0.5	0.000242462	0.4	0.000236431	0.5	0.000179133	0.4	0.000519907
11	HBG2	0.5	0.000242462	0.4	0.000236431	0.5	0.000179133	0.4	0.000519907
1	SMYD3	0.4	0.000243669	0.3	0.000387216	0.3	0.000602537	0.3	0.000977087
19	ZNF773	0.4	0.000246684	0.3	0.000279857	0.3	0.000565142	0.3	0.000723768
7	DPP6	0.3	0.000247891	0.3	0.000319664	0.4	0.000742466	0.5	0.000539207
4	CCSER1	0.5	0.0002497	0.5	0.000377566	0.3	0.00062425	0.3	0.000527145
2	AC023469.1	0.5	0.00025151	0.5	0.000390835	0.3	0.00599883	0.3	0.000821477
8	STAU2	0.3	0.000252113	0.3	0.000209893	0.3	0.000515685	0.3	0.000246684
1	PGLYRP4	0.3	0.000256335	0.4	9.16773e-05	0.3	0.00683298	0.3	0.00739933
6	HLA-DQA2	0.3	0.000258144	0.3	0.000177926	0.3	0.00297831	0.3	0.00294453
10	GSTO1	0.4	0.000281667	0.5	0.000235828	0.3	0.241734	0.3	0.190069
14	NUBPL	0.3	0.000281667	0.4	0.000469243	0.3	0.00218276	0.3	0.00137395
18	NEDD4L	0.3	0.000287698	0.5	0.000336552	0.3	0.000589871	0.5	0.00105429
7	RELN	0.3	0.000288301	0.3	0.000421595	0.3	0.00154826	0.3	0.00112425
5	SPINK5	0.3	0.000293729	0.3	0.000369122	0.4	0.0017286	0.5	0.000787098
12	TESPA1	0.3	0.000300967	0.3	0.000199639	0.3	0.0140556	0.3	0.00581126
1	SLC35F3	0.3	0.000305792	0.3	0.000477084	0.3	0.000758751	0.3	0.00020748
3	WWTR1	0.3	0.000306998	0.3	0.000278651	0.3	0.000507241	0.3	0.00105791
3	SLC9C1	0.3	0.000316046	0.3	0.000170689	0.3	0.000264779	0.3	0.000642344
8	SNTB1	0.3	0.000323886	0.3	0.000273223	0.5	0.00750065	0.3	0.00588846
19	ZNF98	0.3	0.000325696	0.3	0.0004801	0.3	0.00442403	0.3	0.00358024
1	SCP2	0.3	0.000326299	0.3	0.000328108	0.3	0.0226407	0.3	0.0325183
2	RFX8	0.3	0.000340774	0.4	0.000451752	0.3	0.00213451	0.5	0.00132088
2	PPP1R1C	0.5	0.000344393	0.5	0.000369122	0.3	0.00080097	0.3	0.00304405
2	C2orf83	0.3	0.000344393	0.5	0.000416167	0.3	0.000807605	0.3	0.000674914
4	CENPU	0.3	0.000349218	0.4	0.000357059	0.3	0.0055899	0.3	0.000811827
1	BCAR3	0.5	0.000351028	0.3	0.000475878	0.3	0.00843914	0.3	0.00379858
3	ST6GAL1	0.5	0.000356456	0.5	0.000448133	0.3	0.00501451	0.5	0.00680885
12	SMCO2	0.3	0.000358265	0.4	0.000450546	0.3	0.0490727	0.3	0.0228693
15	RP11-96O20.4	0.5	0.000358868	0.5	0.000214718	0.3	0.00133535	0.3	0.000662248
15	SQRDL	0.5	0.000358868	0.5	0.000214718	0.3	0.00133535	0.3	0.000662248
11	SLC35F2	0.5	0.000360678	0.4	0.000325696	0.5	0.00697471	0.5	0.00903444
12	CLEC1A	0.4	0.000362487	0.5	0.000205068	0.3	0.00499822	0.3	0.00593249
12	DHX37	0.5	0.000363694	0.5	0.000162245	0.5	0.00266769	0.5	0.00164778
13	KLHL1	0.3	0.000381185	0.4	0.000480703	0.3	0.00340955	0.3	0.00150725
4	STK32B	0.3	0.000390835	0.5	0.000223162	0.3	0.0240122	0.3	0.0122926
16	GRIN2A	0.3	0.000422198	0.3	0.000389629	0.3	0.0041683	0.5	0.00386311
1	CASQ2	0.3	0.000427626	0.3	0.000367916	0.3	0.00319061	0.3	0.00501029
15	FAM189A1	0.3	0.000445118	0.3	0.000373947	0.4	0.00058384	0.4	0.000509654
22	CRELD2	0.5	0.00044753	0.5	0.000389026	0.3	0.00472741	0.3	0.00249881
4	LGI2	0.5	0.000450546	0.5	0.000298554	0.5	0.000764782	0.5	0.000605553
6	ESR1	0.5	0.000465624	0.5	0.000373947	0.3	0.00909415	0.5	0.00607181
1	C1orf94	0.3	0.000475878	0.4	0.000424008	0.3	0.00752237	0.3	0.0337891
11	CLMP	0.3	0.0004801	0.3	0.000396866	0.3	0.002035	0.3	0.00385648
1	NCMAP	0.3	0.000486734	0.3	0.000127866	0.3	0.01909	0.3	0.0188282
11	MMP26	0.5	0.00048975	0.5	0.000284682	0.3	0.000554286	0.3	0.000439086
14	GNG2	0.3	0.000491559	0.3	0.000155007	0.3	0.00600909	0.5	0.00430763
3	KNG1	0.5	0.000497591	0.5	0.000457783	0.5	0.000365503	0.3	0.000525938

## Sheet: Shared_outliers
Chr	Acronym	tf.LWK	p.LWK	tf.YRI	p.YRI	tf.GBR	p.GBR	tf.TSI	p.TSI
6	HLA-DPA1	0.5	1.20628e-06	0.3	6.0314e-07	0.3	3.61884e-05	0.3	2.47288e-05
6	HLA-DQA1	0.4	1.20628e-06	0.4	3.0157e-06	0.3	1.93005e-05	0.3	7.84082e-06
10	MYO3A	0.3	9.0471e-06	0.3	1.08565e-05	0.5	6.0314e-07	0.5	6.0314e-07
4	CPE	0.3	1.08565e-05	0.3	7.23768e-06	0.3	4.82512e-06	0.3	4.82512e-06
6	HLA-DPB1	0.5	1.32691e-05	0.5	3.07602e-05	0.4	6.81549e-05	0.3	5.36795e-05
6	HLA-DRB5	0.5	1.86973e-05	0.4	1.93005e-05	0.4	1.08565e-05	0.4	1.68879e-05
14	EGLN3	0.3	2.35225e-05	0.3	2.47288e-05	0.5	3.61884e-05	0.3	2.65382e-05
8	PREX2	0.5	2.41256e-05	0.5	2.65382e-05	0.3	8.02177e-05	0.3	5.66952e-05
4	UGT2B4	0.5	2.47288e-05	0.4	6.93611e-05	0.3	6.39329e-05	0.3	4.64418e-05
6	RP11-257K9.8	0.5	2.95539e-05	0.5	9.0471e-06	0.4	0.000109168	0.5	5.66952e-05
6	HLA-DQB2	0.5	3.07602e-05	0.3	2.53319e-05	0.5	0.000140532	0.3	0.000158626
6	PACRG	0.5	3.19664e-05	0.5	2.35225e-05	0.4	0.000286492	0.4	0.000442102
6	HLA-C	0.3	3.31727e-05	0.3	4.10135e-05	0.3	5.97109e-05	0.3	8.74553e-05
11	SNX19	0.5	4.70449e-05	0.5	3.92041e-05	0.5	4.2823e-05	0.5	4.40292e-05
2	SH3RF3	0.5	5.66952e-05	0.3	7.96145e-05	0.3	0.000151991	0.3	6.27266e-05
6	HLA-B	0.3	6.33297e-05	0.3	5.42826e-05	0.3	5.12669e-05	0.3	4.40292e-05
20	SIRPA	0.5	7.05674e-05	0.5	8.02177e-05	0.3	0.000135707	0.3	0.000118216
4	YIPF7	0.4	8.44396e-05	0.3	0.000180339	0.3	0.000109772	0.5	3.98073e-05
6	HLA-DQB1	0.3	8.56459e-05	0.3	7.78051e-05	0.3	4.58387e-05	0.3	6.0314e-05
11	PDGFD	0.5	9.40899e-05	0.5	6.99643e-05	0.5	3.19664e-05	0.5	1.86973e-05
10	DMBT1	0.5	9.65024e-05	0.5	0.000100724	0.5	0.000175514	0.3	0.000464418
2	SPAG16	0.3	9.71056e-05	0.3	8.20271e-05	0.5	1.20628e-05	0.3	1.32691e-05
4	TMPRSS11E	0.4	0.000117009	0.4	6.63454e-05	0.3	0.000101931	0.4	0.000159832
3	SUCLG2	0.4	0.000119422	0.3	0.000133294	0.5	3.0157e-05	0.4	0.000120025
3	CPNE4	0.3	0.000124247	0.3	0.000488544	0.5	0.000116406	0.5	0.000101931
14	OR6J1	0.3	0.000125453	0.3	0.000124247	0.3	0.000414961	0.3	0.000247288
19	ZNF83	0.5	0.000126659	0.5	5.18701e-05	0.4	7.298e-05	0.5	6.75517e-05
1	PPAP2B	0.3	0.000126659	0.3	0.0001345	0.5	3.8601e-05	0.5	6.57423e-05
5	STK32A	0.5	0.0001345	0.5	0.000112184	0.5	0.000117612	0.4	0.000146563
17	WSCD1	0.3	0.0001345	0.5	0.000146563	0.3	0.00020929	0.3	0.000123041
1	FMN2	0.3	0.000138722	0.3	0.000184561	0.3	0.000194211	0.3	2.17131e-05
12	MYRFL	0.5	0.000140532	0.4	0.00025935	0.3	0.000380582	0.5	0.000198433
6	HLA-DRB1	0.3	0.000154404	0.3	9.4693e-05	0.3	4.76481e-05	0.3	9.0471e-05
4	FRAS1	0.4	0.00015742	0.3	0.000461402	0.3	0.000368519	0.3	0.000261763
10	RRP12	0.5	0.000161038	0.5	0.000279857	0.3	0.000323886	0.3	0.000483115
6	HLA-G	0.5	0.000161642	0.4	0.000144754	0.5	0.000209893	0.4	0.000144151
3	MYRIP	0.4	0.000162245	0.5	0.000135707	0.3	0.00024005	0.3	0.000225574
6	CDSN	0.3	0.000163451	0.3	0.00015561	0.4	8.02177e-05	0.4	6.33297e-05
6	PSORS1C1	0.3	0.000163451	0.3	0.00015561	0.4	8.02177e-05	0.4	6.33297e-05
4	GPRIN3	0.5	0.000170086	0.5	0.000143547	0.5	0.000201449	0.4	0.00028046
8	CNBD1	0.5	0.000171292	0.5	0.000299761	0.3	0.00028227	0.3	0.000183355
18	CCDC102B	0.4	0.000173704	0.4	0.00017672	0.3	0.000190592	0.3	0.00014596
4	MANBA	0.5	0.000177323	0.3	0.000344393	0.5	0.000236431	0.5	0.000234018
7	HUS1	0.3	0.000177926	0.3	0.000194211	0.4	5.85046e-05	0.5	4.70449e-05
8	IDO2	0.5	0.000177926	0.5	0.000349821	0.4	0.000158626	0.5	7.96145e-05
12	CHST11	0.3	0.000179133	0.4	0.000246684	0.3	0.000200243	0.3	0.000129675
1	ERO1LB	0.5	0.00018637	0.5	0.000233415	0.4	0.000232812	0.4	0.000142341
1	GPR137B	0.5	0.00018637	0.5	0.000233415	0.4	0.000232812	0.4	0.000142341
16	RBFOX1	0.3	0.000189386	0.4	0.000351631	0.5	0.000361884	0.4	0.000313633
10	PDSS1	0.3	0.000199639	0.3	0.000277445	0.3	0.000388422	0.4	0.000467434
2	LRP1B	0.5	0.000205671	0.5	0.000215321	0.5	0.000285285	0.5	0.000278048
19	CTD-3105H18.18	0.4	0.000208687	0.5	0.000180339	0.3	0.000429436	0.4	0.000197227
1	EDARADD	0.5	0.000209893	0.5	0.000222559	0.4	0.000121231	0.4	0.000148976
12	C12orf55	0.5	0.000216527	0.5	0.000258144	0.3	0.000149579	0.3	0.000120025
2	SNTG2	0.5	0.00021894	0.5	0.0001345	0.5	0.000225574	0.4	0.000288301
2	THSD7B	0.3	0.000221352	0.3	0.000152594	0.5	7.7202e-05	0.5	0.000100724
6	PHACTR2	0.5	0.000232812	0.5	0.000123041	0.3	0.000191799	0.3	5.24732e-05
20	SMOX	0.5	0.000234018	0.3	0.000329315	0.4	0.000498797	0.5	0.000212305
10	APBB1IP	0.5	0.000234622	0.5	0.000138722	0.4	8.50428e-05	0.4	6.57423e-05
5	SLC27A6	0.3	0.000234622	0.3	0.000210496	0.3	0.000227384	0.4	4.46324e-05
1	C1orf68	0.5	0.000243066	0.5	0.000370328	0.4	0.000439086	0.5	0.000396263
3	ZNF385D	0.3	0.000250303	0.3	0.000274429	0.5	0.00017853	0.5	0.000159229
6	PARK2	0.5	0.000256335	0.5	0.000311824	0.5	0.000244875	0.5	0.000357662
13	SGCG	0.3	0.000259953	0.3	0.00032268	0.5	8.32334e-05	0.4	9.52962e-05
4	TEC	0.3	0.000260557	0.3	0.000383597	0.3	0.000161038	0.4	0.000119422
10	HPSE2	0.5	0.000264175	0.5	0.000372741	0.5	0.000314236	0.4	0.000401088
5	SPEF2	0.5	0.000266588	0.4	0.000137516	0.3	0.000336552	0.5	0.000299761
1	PADI2	0.4	0.000266588	0.5	0.000225574	0.5	0.000267794	0.4	0.000341377
12	BICD1	0.3	0.000272016	0.4	0.000176117	0.3	0.000186973	0.3	0.000163451
4	SLC2A9	0.3	0.000289507	0.3	0.000268397	0.5	0.000101931	0.5	6.8758e-05
3	ALDH1L1	0.3	0.000294332	0.3	0.000296745	0.4	0.000357662	0.4	0.000358265
17	CEP112	0.3	0.000297348	0.3	0.000239447	0.5	8.50428e-05	0.4	8.80585e-05
4	COL25A1	0.5	0.000302776	0.5	0.000302173	0.3	0.000252113	0.3	0.000477687
11	TRIM5	0.5	0.000310014	0.5	0.000395057	0.3	0.000278048	0.5	0.000111581
12	OVCH1	0.3	0.000313633	0.3	0.000320268	0.3	0.000256335	0.3	0.000124247
12	OVCH1-AS1	0.3	0.000313633	0.3	0.000320268	0.3	0.000256335	0.3	0.000124247
20	SPTLC3	0.4	0.000316046	0.5	0.000452355	0.3	0.000271413	0.3	0.000262366
9	TEK	0.5	0.000334743	0.5	0.000483115	0.5	0.000344996	0.5	0.000346806
10	CTNNA3	0.5	0.000335346	0.5	0.000323283	0.4	0.000173704	0.3	0.00023824
1	TNN	0.3	0.000338362	0.3	0.000199036	0.5	7.96145e-05	0.5	8.20271e-05
7	ABCA13	0.5	0.000341981	0.4	0.000201449	0.3	0.000244875	0.3	0.000250303
4	ANK2	0.4	0.000342584	0.3	0.00037455	0.3	7.96145e-05	0.4	6.75517e-05
4	STPG2	0.3	0.00035525	0.5	0.000339568	0.5	0.000336552	0.5	0.000164657
9	FXN	0.5	0.000361281	0.4	0.00038601	0.5	0.000274429	0.5	0.000320871
8	CSMD1	0.3	0.000368519	0.3	0.000460799	0.4	6.0314e-06	0.4	4.22198e-06
4	ART3	0.3	0.000369725	0.3	0.000202052	0.5	0.000189386	0.5	0.00017672
4	CXCL11	0.3	0.000369725	0.3	0.000202052	0.5	0.000189386	0.5	0.00017672
13	KL	0.5	0.000370931	0.5	0.000268397	0.3	6.0314e-05	0.3	0.000168276
5	MSH3	0.3	0.000378169	0.4	0.000350425	0.3	0.000450546	0.3	0.000234622
1	SPRR3	0.4	0.000393851	0.5	0.000360678	0.5	0.000367312	0.5	0.000141738
1	RYR2	0.3	0.00039566	0.4	0.000319061	0.3	0.000490353	0.5	0.000191195
8	SGCZ	0.5	0.000400485	0.5	0.00018818	0.3	0.000396866	0.3	0.00019783
3	FHIT	0.5	0.000404707	0.5	0.000462609	0.4	0.000449943	0.4	0.000396866
20	PLCB4	0.5	0.000410739	0.5	9.16773e-05	0.5	9.65024e-05	0.5	0.000110375
1	RNPEP	0.4	0.00041677	0.5	0.000451149	0.4	0.000410135	0.5	0.000388422
18	LDLRAD4	0.4	0.000417976	0.4	0.000403501	0.5	0.00010374	0.5	8.92648e-05
12	PRR4	0.3	0.000417976	0.3	0.000425214	0.3	0.00033233	0.5	0.000292523
12	TAS2R14	0.3	0.000417976	0.3	0.000425214	0.3	0.00033233	0.5	0.000292523
14	PSMC1	0.5	0.000423404	0.5	0.000376963	0.5	0.000390835	0.5	0.000435467
22	FAM19A5	0.4	0.000423404	0.3	0.000463815	0.3	0.000314236	0.3	0.000184561
3	SLC15A2	0.5	0.00042642	0.5	0.00025151	0.5	0.000206274	0.4	0.000431848
10	PTCHD3	0.4	0.000469243	0.5	0.000378169	0.3	0.000371534	0.5	0.00030157

## Sheet: Eur_outliers
Chr	Acronym	tf.LWK	p.LWK	tf.YRI	p.YRI	tf.GBR	p.GBR	tf.TSI	p.TSI
1	NSUN4	0.3	0.00168578	0.3	0.000305792	0.3	4.10135e-05	0.3	0.000154404
1	CNR2	0.3	0.000550064	0.3	0.000910742	0.5	7.298e-05	0.5	0.000121231
6	RUNX2	0.5	0.00076056	0.5	0.000948137	0.5	8.74553e-05	0.3	0.000144151
13	CCDC169	0.3	0.000757544	0.3	0.000211702	0.5	0.000109772	0.5	7.84082e-05
13	CCDC169-SOHLH2	0.3	0.000757544	0.3	0.000211702	0.5	0.000109772	0.5	7.84082e-05
13	SOHLH2	0.3	0.000757544	0.3	0.000211702	0.5	0.000109772	0.5	7.84082e-05
12	NTN4	0.3	0.00139506	0.3	0.00033414	0.4	0.000118216	0.4	8.62491e-05
5	ITGA1	0.3	0.00144935	0.3	0.00136249	0.3	0.000121834	0.3	0.000189386
5	CDH18	0.3	0.00116466	0.3	0.000751513	0.5	0.00012485	0.5	0.000215924
4	KIAA1211	0.3	0.000458387	0.3	0.000503019	0.3	0.000145357	0.3	0.00012485
9	KDM4C	0.3	0.00201027	0.5	0.00509533	0.3	0.000148976	0.3	0.000149579
9	POLR1E	0.3	0.000333537	0.3	0.000560317	0.3	0.000150182	0.3	0.000193005
12	TMEM132C	0.5	0.000267794	0.3	0.000639932	0.3	0.00015561	0.5	0.000158023
12	GRIP1	0.3	0.000642948	0.4	0.00297288	0.3	0.000160435	0.4	0.000267794
2	IL18R1	0.3	0.00030338	0.3	0.0016321	0.5	0.000162245	0.4	0.000191195
2	IL1RL1	0.3	0.00030338	0.3	0.0016321	0.5	0.000162245	0.4	0.000191195
17	RPAIN	0.3	0.000242462	0.3	0.00274791	0.3	0.000165864	0.3	0.000214718
1	LAMC2	0.4	0.000944518	0.3	0.000366709	0.5	0.000171895	0.5	0.000200846
4	ADH4	0.3	0.00585106	0.3	0.0345611	0.3	0.000172498	0.3	0.000135103
6	ZC3H12D	0.5	0.000471656	0.5	0.000636916	0.5	0.000174911	0.3	0.000244875
12	VWF	0.5	0.00273765	0.5	0.000789511	0.3	0.000180942	0.3	0.000305189
3	VPS8	0.5	0.000275032	0.5	0.000638726	0.5	0.000186973	0.5	0.000211099
2	COL4A3	0.3	0.00106575	0.3	0.000392041	0.3	0.000193608	0.3	0.000215924
7	ORC5	0.3	0.000272619	0.3	0.000579618	0.3	0.000194814	0.3	0.000164054
4	SEPT11	0.4	0.000711102	0.3	0.00100543	0.5	0.000196021	0.3	0.000369122
3	KALRN	0.3	0.000357059	0.3	0.00109711	0.3	0.000206877	0.5	0.00012485
2	NCK2	0.3	0.00684806	0.5	0.0656518	0.5	0.00020929	0.5	0.000219543
3	ULK4	0.5	0.000226178	0.3	0.000623647	0.5	0.000214115	0.5	0.000174308
4	RASSF6	0.3	0.0003842	0.3	0.000516891	0.3	0.00021894	0.5	9.65024e-05
2	TNS1	0.5	0.000521716	0.3	0.000402898	0.4	0.000221956	0.5	0.000302776
12	OAS1	0.3	0.129543	0.3	0.120159	0.3	0.000226781	0.5	0.000201449			opposite signatures in Afr and Eur
8	WDYHV1	0.3	0.00100423	0.3	0.000754529	0.3	0.000227987	0.3	0.000203258
8	SNX31	0.4	0.000580824	0.5	0.000327505	0.3	0.00022859	0.5	0.000109168			p<0.0005 for the population (only for those not included in the set)
10	ALDH18A1	0.3	0.00355069	0.3	0.0507247	0.5	0.000229796	0.5	0.000397469
12	NAV3	0.3	0.000867316	0.4	0.000630282	0.4	0.000235225	0.3	0.00030157
17	CRHR1	0.5	0.0136581	0.5	0.0119657	0.3	0.000257541	0.4	0.000222559
1	PGBD5	0.3	0.00077021	0.3	0.000563333	0.3	0.000261763	0.3	0.000338362
11	OR52E6	0.3	0.00239929	0.4	0.00123885	0.3	0.000278048	0.5	0.000111581
2	CNTNAP5	0.5	0.00152474	0.5	0.000841381	0.3	0.000288301	0.3	0.000341981
18	DOK6	0.3	0.00139868	0.3	0.00171955	0.3	0.000292523	0.3	0.000239447
10	PDLIM1	0.3	0.000505432	0.3	0.00105067	0.4	0.000296745	0.4	0.000334743
8	MTSS1	0.3	0.000621838	0.3	0.00280943	0.3	0.000313633	0.5	0.000359472
12	PDZRN4	0.3	0.000694818	0.3	0.000719546	0.5	0.000316046	0.5	0.000405913
6	C6orf15	0.3	0.00118276	0.3	0.000637519	0.3	0.000317252	0.3	0.000211099
11	TCP11L1	0.4	0.000555492	0.5	0.000621838	0.5	0.000319664	0.4	0.000317855
1	REG4	0.3	0.000782876	0.3	0.000465021	0.5	0.000330521	0.4	0.000221956
6	HLA-DRA	0.3	0.000440896	0.3	0.00200966	0.3	0.000342584	0.3	0.000317252
15	C15orf41	0.3	0.00169121	0.5	0.000902298	0.4	0.000345599	0.4	0.000361281
12	KRT83	0.5	0.000808208	0.5	0.000632694	0.5	0.000352234	0.5	0.000278651
12	AC121757.1	0.5	0.000808208	0.5	0.00070688	0.5	0.000352234	0.5	0.000278651
4	TMEM128	0.3	0.000420389	0.5	0.0321046	0.5	0.00035344	0.4	0.000265985
5	SLC38A9	0.5	0.000544636	0.5	0.000474671	0.4	0.000354647	0.5	0.00022859
4	C4orf19	0.3	0.000933661	0.5	0.000701452	0.5	0.000354647	0.5	0.000241256
2	GRAMD4	0.5	0.0065682	0.5	0.00701512	0.5	0.000356456	0.5	0.000360678
9	TRPM3	0.5	0.000844396	0.5	0.000773829	0.5	0.000358265	0.3	0.000264779
12	CCDC91	0.3	0.000734022	0.3	0.00128047	0.3	0.000364297	0.5	0.000224971
10	BICC1	0.3	0.00303621	0.3	0.00185767	0.5	0.000366106	0.5	0.000321474
5	IQGAP2	0.3	0.000734625	0.3	0.000686977	0.4	0.000366709	0.3	0.000302776
6	AL590867.1	0.3	0.00193548	0.3	0.00058384	0.5	0.000370931	0.5	0.000364297
1	SLC30A10	0.3	0.00135103	0.3	0.000854047	0.3	0.000378772	0.3	0.00022859
8	RP11-383H13.1	0.5	0.00123222	0.5	0.000592284	0.5	0.000387216	0.5	0.000317855
8	TRPA1	0.5	0.00123222	0.5	0.000592284	0.5	0.000387216	0.5	0.000317855
1	HPCAL4	0.3	0.00216829	0.3	0.00206214	0.3	0.000397469	0.3	0.00033414
8	CSMD3	0.3	0.000580824	0.3	0.00114959	0.5	0.000400485	0.5	0.000366106
4	SLC7A11	0.3	0.00586373	0.3	0.00189627	0.5	0.000406517	0.5	0.00036309
1	SPRR1B	0.5	0.000472862	0.5	0.000598315	0.5	0.000413754	0.5	0.000248494
2	SP140L	0.3	0.00102775	0.3	0.00492524	0.3	0.00041677	0.3	0.000360075
3	ROBO2	0.5	0.000642948	0.5	0.00112486	0.4	0.000419786	0.3	0.000259953
2	PRKCE	0.3	0.000940899	0.3	0.00172197	0.5	0.000419786	0.5	0.000457783
16	CLEC3A	0.3	0.00398193	0.3	0.0100284	0.5	0.000422801	0.3	0.000342584
6	LAMA2	0.3	0.001728	0.4	0.000432452	0.5	0.000436674	0.5	0.000284682
12	KSR2	0.5	0.0010555	0.4	0.000497591	0.4	0.000440292	0.5	0.000233415
11	CNTN5	0.4	0.00165924	0.3	0.000820874	0.4	0.000451752	0.3	0.000287095
11	DEPDC7	0.4	0.000631488	0.5	0.00037455	0.5	0.000452355	0.5	0.000417976
4	RASGEF1B	0.3	0.00104524	0.5	0.000625457	0.4	0.000453562	0.5	0.00033233
7	SEMA3E	0.3	0.00245177	0.3	0.00129494	0.5	0.000461402	0.4	0.000392041
2	GNLY	0.5	0.000817858	0.5	0.000854047	0.3	0.000465624	0.5	0.000267191
5	RAB3C	0.3	0.0010754	0.3	0.00931671	0.3	0.000469243	0.3	0.000393247
3	ADCY5	0.4	0.000515685	0.4	0.000483115	0.3	0.000477084	0.5	0.000187577
7	SKAP2	0.5	0.00355431	0.3	0.00193849	0.3	0.000477687	0.3	0.000475275
4	KLHL5	0.5	0.000781067	0.5	0.00106213	0.5	0.000485528	0.5	0.000254525
4	FAM114A1	0.3	0.000738847	0.3	0.00103861	0.3	0.000486734	0.3	0.00031122
10	PRKG1	0.5	0.000565142	0.3	0.000686374	0.3	0.000487337	0.3	0.000361281
15	LINC00923	0.5	0.000541017	0.5	0.000845603	0.5	0.000495178	0.5	0.000477084

## Sheet: Afr_significant
Chr	Acronym	tf.LWK	p.LWK	tf.YRI	p.YRI	tf.GBR	p.GBR	tf.TSI	p.TSI
11	LUZP2	0.3	1.33e-05	0.3	2.23e-05	0.3	0.00258988	0.3	0.00258988			opposite signatures in Afr and Eur
4	POLN	0.5	6.27e-05	0.5	5.13e-05	0.3	0.0535341	0.3	0.00144452
5	SV2C	0.5	7.24e-05	0.5	8.81e-05	0.5	0.00682212	0.5	0.00640354
18	DTNA	0.3	0.000115803	0.3	0.000243066	0.3	0.00556518	0.3	0.00127866
3	SPATA16	0.3	0.000117009	0.4	8.99e-05	0.3	0.0239459	0.3	0.0203089
15	C15orf48	0.3	0.000120628	0.5	4.95e-05	0.3	0.419699	0.3	0.224465
3	CLDN16	0.3	0.000141738	0.3	0.000196021	0.3	0.0159959	0.3	0.011216
1	NFASC	0.5	0.000141738	0.3	0.000316046	0.3	0.00172438	0.3	0.00265442
7	GTF2IRD1	0.3	0.000168276	0.3	7.06e-05	0.3	0.0712273	0.5	0.0689607
1	ABCA4	0.3	0.000168879	0.3	0.000164657	0.3	0.0107685	0.5	0.0139977
19	VRK3	0.3	0.000194814	0.3	0.0006339	0.3	0.00496023	0.3	0.00111279
16	CDYL2	0.3	0.000215924	0.3	0.000334743	0.3	0.00991563	0.3	0.00571234
6	HLA-F	0.3	0.000217734	0.3	0.000153198	0.3	0.00060314	0.3	0.00192764
21	IGSF5	0.3	0.000238844	0.4	0.000562127	0.3	0.00344273	0.3	0.00095839
2	AC023469.1	0.5	0.00025151	0.5	0.000390835	0.3	0.00599883	0.3	0.000821477
1	PGLYRP4	0.3	0.000256335	0.4	9.17e-05	0.3	0.00683298	0.3	0.00739932
10	ABI1	0.5	0.000257541	0.3	0.000759957	0.3	0.00540836	0.3	0.00100664
6	HLA-DQA2	0.3	0.000258144	0.3	0.000177926	0.3	0.00297831	0.3	0.00294453
10	GSTO1	0.4	0.000281667	0.5	0.000235828	0.3	0.241734	0.3	0.190069
12	TESPA1	0.3	0.000300967	0.3	0.000199639	0.3	0.0140556	0.3	0.00581126
8	SNTB1	0.3	0.000323886	0.3	0.000273223	0.5	0.00750065	0.3	0.00588846
1	TSNAX-DISC1	0.3	0.000324489	0.3	0.000689993	0.5	0.00594636	0.5	0.00783479
19	ZNF98	0.3	0.000325696	0.3	0.0004801	0.3	0.00442403	0.3	0.00358024
1	SCP2	0.3	0.000326299	0.3	0.000328108	0.3	0.0226407	0.3	0.0325183
6	LAMA4	0.3	0.000329918	0.3	0.00062425	0.5	0.00677146	0.5	0.00580764
4	MAEA	0.5	0.000343187	0.3	0.00108626	0.3	0.0646078	0.5	0.0845753
4	CENPU	0.3	0.000349218	0.4	0.000357059	0.3	0.0055899	0.3	0.000811827
1	BCAR3	0.5	0.000351028	0.3	0.000475878	0.3	0.00843914	0.3	0.00379858
3	ST6GAL1	0.5	0.000356456	0.5	0.000448133	0.3	0.00501451	0.5	0.00680885
12	CLEC6A	0.5	0.000357059	0.5	0.000559111	0.3	0.00207239	0.3	0.000819668
12	SMCO2	0.3	0.000358265	0.4	0.000450546	0.3	0.0490727	0.3	0.0228693
15	RP11-96O20.4	0.5	0.000358868	0.5	0.000214718	0.3	0.00133535	0.3	0.000662248
15	SQRDL	0.5	0.000358868	0.5	0.000214718	0.3	0.00133535	0.3	0.000662248
11	SLC35F2	0.5	0.000360678	0.4	0.000325696	0.5	0.00697472	0.5	0.00903444
12	CLEC1A	0.4	0.000362487	0.5	0.000205068	0.3	0.00499822	0.3	0.00593249
10	ATRNL1	0.3	0.000367916	0.3	0.000615806	0.5	0.00414538	0.5	0.00616108
21	SLC37A1	0.3	0.000376963	0.3	0.000599521	0.3	0.0162661	0.3	0.00373887
4	STK32B	0.3	0.000390835	0.5	0.000223162	0.3	0.0240122	0.3	0.0122926
6	ENPP1	0.4	0.000397469	0.3	0.000595903	0.3	0.0993185	0.3	0.0680179
14	KCNH5	0.5	0.000399279	0.5	0.000823287	0.3	0.00408869	0.3	0.00245176
19	ZNF766	0.5	0.000414961	0.3	0.000834746	0.3	0.0458972	0.3	0.0562627
16	GRIN2A	0.3	0.000422198	0.3	0.000389629	0.3	0.0041683	0.5	0.00386311
14	DHRS4	0.4	0.000424008	0.3	0.000860078	0.3	0.119364	0.3	0.0348917
11	VSTM5	0.3	0.000434864	0.3	0.000547048	0.4	0.0211793	0.3	0.00396263
22	CRELD2	0.5	0.00044753	0.5	0.000389026	0.3	0.00472741	0.3	0.00249881
6	ESR1	0.5	0.000465624	0.5	0.000373947	0.3	0.00909415	0.5	0.00607181
1	CD84	0.3	0.000472862	0.3	0.000536192	0.3	0.0234525	0.3	0.00971056
1	C1orf94	0.3	0.000475878	0.4	0.000424008	0.3	0.00752237	0.3	0.0337891
11	CLMP	0.3	0.0004801	0.3	0.000396866	0.3	0.00203499	0.3	0.00385648
1	NCMAP	0.3	0.000486734	0.3	0.000127866	0.3	0.01909	0.3	0.0188282
17	BCAS3	0.3	0.000492162	0.5	0.0026695	0.3	0.00483718	0.3	0.00335648
2	PLB1	0.3	0.000495781	0.3	0.000607965	0.3	0.0109838	0.3	0.0157245
12	MYO1H	0.3	0.000504225	0.3	0.000200846	0.3	0.00658629	0.5	0.0136533
19	RFX2	0.3	0.000519304	0.3	0.0010754	0.5	0.0191364	0.5	0.0142836
5	DMGDH	0.3	0.000524129	0.3	0.000724372	0.3	0.0063957	0.5	0.00438845
7	ESYT2	0.3	0.000525938	0.5	0.000414961	0.3	0.0130218	0.3	0.00281546
3	TDGF1	0.3	0.000539207	0.3	0.00645662	0.3	0.00427325	0.5	0.00251389
10	GPR158	0.4	0.000541017	0.4	0.00110194	0.3	0.0034192	0.3	0.00342101
11	PARVA	0.3	0.000545239	0.3	0.000509654	0.5	0.0348024	0.5	0.0322487
6	OR11A1	0.5	0.000547651	0.3	0.000732212	0.3	0.111321	0.4	0.148168
11	NTM	0.4	0.000559714	0.4	0.00192583	0.3	0.00288603	0.5	0.00721356
11	GLYATL2	0.3	0.000565746	0.5	0.000375756	0.3	0.00711826	0.3	0.0139597
13	TMCO3	0.5	0.000577205	0.5	0.000406517	0.3	0.0145019	0.3	0.00688786
2	ASB18	0.5	0.000589268	0.3	0.000890838	0.3	0.00642827	0.3	0.0142956
11	OR52N4	0.3	0.000644757	0.3	0.00177263	0.3	0.00708328	0.3	0.0104524
6	PLEKHG1	0.5	0.000645963	0.3	0.000316649	0.5	0.00982455	0.5	0.0238687
12	LGR5	0.3	0.000651995	0.5	0.00252233	0.3	0.006184	0.3	0.0436752
18	IMPA2	0.3	0.000656217	0.4	0.00077986	0.3	0.00279797	0.3	0.0024192
14	KHNYN	0.4	0.000675517	0.5	0.00033233	0.3	0.0369707	0.3	0.104042
14	SDR39U1	0.4	0.000675517	0.5	0.00033233	0.3	0.0369707	0.3	0.10437
2	ERBB4	0.3	0.000680342	0.3	0.000936074	0.5	0.00289025	0.5	0.00414478
4	CCDC158	0.3	0.000683358	0.3	0.00254163	0.3	0.0087196	0.3	0.0194676
5	ABLIM3	0.3	0.000685167	0.3	0.000842587	0.4	0.00709595	0.3	0.00449943
10	HABP2	0.5	0.000686977	0.5	0.000835349	0.3	0.00205128	0.3	0.00068758
12	TMEM117	0.5	0.000691802	0.5	0.000401088	0.3	0.0209091	0.3	0.00825518
16	CMC2	0.3	0.000692405	0.5	0.00127986	0.3	0.00260738	0.3	0.0172474
10	FFAR4	0.3	0.000706277	0.3	0.00107238	0.3	0.00659293	0.5	0.0127805
10	RBP4	0.3	0.000706277	0.3	0.00107238	0.3	0.00659293	0.5	0.0431848
15	LIPC	0.3	0.00070688	0.3	0.00192341	0.3	0.029148	0.3	0.0312384
7	CCDC146	0.5	0.000711706	0.4	0.000870331	0.3	0.00905133	0.3	0.00302294
2	PXDN	0.3	0.000723165	0.3	0.000774432	0.3	0.00455431	0.5	0.00964361
2	SPHKAP	0.4	0.000731006	0.3	0.00111702	0.3	0.00114838	0.5	0.000924011
9	BNC2	0.3	0.000735228	0.5	0.000405913	0.3	0.0043402	0.3	0.00589148
22	BCR	0.3	0.000746688	0.4	0.000995182	0.3	0.0164307	0.3	0.0146358
1	PALMD	0.3	0.000759354	0.3	0.000463212	0.5	0.140808	0.5	0.156641
8	PABPC1	0.3	0.000774432	0.3	0.00391317	0.5	0.147709	0.3	0.116564
18	ARHGAP28	0.3	0.00077986	0.3	0.000556095	0.3	0.0033414	0.3	0.00300123
9	OR13C5	0.5	0.000787098	0.3	0.000857666	0.3	0.00570993	0.3	0.012552
17	STX8	0.3	0.000791923	0.3	0.00180882	0.3	0.0120954	0.3	0.00932274
8	PDGFRL	0.5	0.000803383	0.4	0.000556699	0.3	0.00840054	0.3	0.00694999
9	GOLM1	0.5	0.000805192	0.3	0.00189688	0.3	0.0153463	0.3	0.0101195
15	WDR72	0.3	0.000811827	0.4	0.00102835	0.5	0.0202492	0.4	0.0184151
1	ALDH4A1	0.3	0.000838365	0.3	0.00139627	0.3	0.0175104	0.3	0.00926001
5	ZNF354B	0.3	0.000844396	0.3	0.000322077	0.3	0.0134518	0.3	0.00644878
7	EGFR	0.5	0.000861888	0.5	0.00128891	0.3	0.00702055	0.3	0.0040139
12	KRT84	0.5	0.000862491	0.4	0.000870935	0.3	0.00708087	0.3	0.00599702
6	BCKDHB	0.4	0.000872141	0.3	0.00171051	0.3	0.0049367	0.3	0.010406
8	KCNB2	0.4	0.000873347	0.3	0.00154585	0.5	0.00799764	0.5	0.00859777
18	PSTPIP2	0.5	0.000875157	0.5	0.000869125	0.3	0.0166057	0.3	0.00793914
3	PRSS50	0.4	0.000875157	0.5	0.000996991	0.3	0.0136026	0.3	0.0162661
3	PRSS45	0.4	0.000875157	0.5	0.000996991	0.3	0.0196913	0.3	0.0211732
5	MYOZ3	0.3	0.000886013	0.5	0.000980706	0.3	0.227027	0.3	0.0391004
19	ZNF577	0.3	0.000895663	0.3	0.000679136	0.3	0.00464418	0.5	0.00337939
4	ADAMTS3	0.3	0.00090471	0.3	0.00111943	0.5	0.0214006	0.5	0.0156382
13	KLF12	0.3	0.000909536	0.5	0.00184259	0.4	0.00369062	0.3	0.00560559
5	TTC37	0.5	0.000913154	0.5	0.000986134	0.3	0.0217752	0.3	0.00115682
11	STT3A	0.3	0.000927027	0.3	0.000882394	0.3	0.00301751	0.5	0.00269362
7	AOAH	0.5	0.000938486	0.5	0.00156213	0.5	0.00539871	0.5	0.00521777
19	ACSBG2	0.3	0.000944518	0.3	0.0010754	0.5	0.0191364	0.5	0.0142836
6	GRM4	0.4	0.000949946	0.3	0.000656217	0.3	0.00680403	0.3	0.0123095
1	PTGFRN	0.5	0.000965024	0.5	0.00100302	0.5	0.013102	0.5	0.0117124
11	OR51J1	0.3	0.000976484	0.4	0.00100966	0.3	0.0261311	0.3	0.0062045
2	IL36RN	0.3	0.000978294	0.3	0.000963215	0.5	0.00108867	0.3	0.00153017
12	PRB2	0.3	0.000980103	0.3	0.00239869	0.3	0.00494575	0.3	0.00203801
19	ZNF345	0.5	0.000997594	0.5	0.00186853	0.3	0.0361534	0.3	0.00679257
11	SLCO2B1	0.4	0.00100785	0.5	0.000496384	0.3	0.00836737	0.3	0.00291679
1	OR2L13	0.3	0.00100845	0.3	0.00101991	0.3	0.053735	0.3	0.0305466
4	LIMCH1	0.4	0.00101026	0.5	0.00108505	0.3	0.00989874	0.3	0.00328289
2	CYBRD1	0.5	0.0010169	0.4	0.00064536	0.5	0.00248192	0.3	0.00129977
7	CALN1	0.4	0.00102896	0.3	0.00125453	0.3	0.000859475	0.3	0.0128764
8	MSR1	0.5	0.00105851	0.4	0.00124187	0.4	0.0346625	0.5	0.0292288
10	ANKRD30A	0.3	0.00105851	0.3	0.00558146	0.5	0.05394	0.5	0.0576035
1	CDC14A	0.3	0.00106394	0.3	0.00100664	0.3	0.0798624	0.3	0.0802382
18	DSC1	0.5	0.00106394	0.4	0.00158746	0.5	0.00269182	0.3	0.000980706
5	FBN2	0.3	0.00107359	0.3	0.000909536	0.3	0.00479316	0.3	0.0399327
2	TLK1	0.3	0.00107842	0.3	0.00311522	0.5	0.0152486	0.3	0.0152775
9	FAM129B	0.5	0.00109168	0.4	0.0009988	0.3	0.00221654	0.3	0.00838184
9	MAMDC2	0.3	0.0010953	0.3	0.000843793	0.3	0.0119898	0.3	0.0179404
11	INCENP	0.3	0.00113451	0.5	0.00380823	0.3	0.00218457	0.3	0.00442584
1	LRRC7	0.3	0.00114235	0.3	0.000661042	0.3	0.00390654	0.3	0.00146503
6	RTN4IP1	0.3	0.00114355	0.3	0.00111098	0.3	0.0850235	0.3	0.00111521
16	FOPNL	0.3	0.00116406	0.3	0.00101086	0.3	0.00199278	0.3	0.0010947
1	CSRP1	0.5	0.00116647	0.5	0.00185707	0.4	0.00237999	0.3	0.00196503
10	MGMT	0.3	0.00116889	0.3	0.000233415	0.3	0.019391	0.3	0.0244447
10	AL355531.2	0.3	0.00116889	0.3	0.000233415	0.5	0.0477024	0.5	0.0709969
5	PRLR	0.5	0.0011707	0.5	0.00112908	0.3	0.00518399	0.3	0.00381607
1	LPHN2	0.4	0.00117793	0.4	0.000644154	0.3	0.0104983	0.5	0.0134597
10	SH2D4B	0.5	0.00118758	0.5	0.000832937	0.3	0.00492826	0.3	0.00185285
6	EPHA7	0.3	0.00119723	0.3	0.000914361	0.3	0.00182872	0.3	0.00151569
8	DPY19L4	0.5	0.00121533	0.4	0.00258084	0.3	0.00430099	0.3	0.0050314
7	NPSR1	0.4	0.00122317	0.3	0.00349037	0.3	0.00341076	0.3	0.00542766
10	JAKMIP3	0.4	0.00122739	0.5	0.00107781	0.3	0.00137818	0.3	0.00267734
13	SHISA2	0.3	0.00123342	0.3	0.00251027	0.3	0.00498616	0.3	0.00729378
17	TSEN54	0.4	0.00123764	0.5	0.00227927	0.3	0.0345394	0.3	0.00480703
1	NKAIN1	0.5	0.00124126	0.5	0.000993975	0.3	0.00817134	0.5	0.0119416
6	PTPRK	0.5	0.0012479	0.5	0.0010561	0.3	0.00239809	0.3	0.0163216
17	TEKT1	0.3	0.00125755	0.3	0.0013444	0.4	0.00386794	0.3	0.00409231
9	TTC39B	0.3	0.00127504	0.3	0.00250243	0.4	0.00916351	0.3	0.00600004
2	PASK	0.5	0.00128529	0.3	0.00136792	0.3	0.0358066	0.5	0.0280551
3	KCNAB1	0.3	0.00128831	0.3	0.00196805	0.5	0.00504768	0.4	0.00577386
1	CELA3B	0.5	0.00130761	0.3	0.000957184	0.3	0.0495419	0.3	0.111814
8	TRPS1	0.3	0.00131243	0.3	0.000618822	0.3	0.0127799	0.5	0.0104983
5	SPATA9	0.5	0.00131545	0.4	0.00217131	0.4	0.00637881	0.3	0.00611826
7	C1GALT1	0.3	0.00131847	0.3	0.00351088	0.3	0.0110417	0.3	0.00346444
8	OPRK1	0.3	0.00132329	0.3	0.00516047	0.3	0.0446143	0.3	0.00375515
4	EVC2	0.3	0.00133656	0.4	0.00238482	0.5	0.0317764	0.5	0.0319333
6	SLC22A16	0.4	0.00134319	0.4	0.000952962	0.3	0.00975459	0.3	0.0125302
2	DYTN	0.5	0.00135405	0.3	0.00205128	0.3	0.00353983	0.3	0.0101985
11	AHNAK	0.5	0.00136068	0.5	0.00256154	0.3	0.022426	0.3	0.0187534
9	SPINK4	0.4	0.00136672	0.3	0.00133897	0.5	0.0357095	0.3	0.00228771
19	ZNF44	0.3	0.00137757	0.3	0.00145357	0.5	0.110556	0.3	0.10675
1	PLD5	0.3	0.00137938	0.3	0.00186973	0.3	0.00404406	0.4	0.00201992
4	NSG1	0.4	0.0013824	0.5	0.00153801	0.4	0.00218699	0.3	0.00189989
19	CYP4F12	0.3	0.00138783	0.3	0.00293609	0.3	0.00284079	0.3	0.00213693
9	ADAMTSL2	0.3	0.00139386	0.3	0.000790717	0.3	0.012783	0.3	0.0223747
14	OR4L1	0.5	0.00139567	0.5	0.00243427	0.5	0.00320991	0.5	0.00491137
2	PTH2R	0.3	0.00140713	0.3	0.000547651	0.3	0.00331908	0.5	0.017096
15	FSIP1	0.3	0.00140773	0.3	0.00104946	0.3	0.00747532	0.5	0.011529
20	KIF16B	0.5	0.00140894	0.3	0.003418	0.3	0.00364659	0.3	0.00217975
6	KCNQ5	0.3	0.0014204	0.3	0.00128348	0.5	0.0105556	0.5	0.0174193
6	BLOC1S5	0.3	0.00145357	0.3	0.00194332	0.3	0.014523	0.3	0.00798437
6	EEF1E1-BLOC1S5	0.3	0.00145357	0.3	0.00194332	0.3	0.016757	0.3	0.00798437
18	C18orf64	0.3	0.00146141	0.3	0.00551089	0.3	0.0111551	0.3	0.0147709
2	ABCA12	0.4	0.00147649	0.5	0.000594093	0.5	0.016099	0.5	0.0147625
7	TPK1	0.3	0.00150242	0.3	0.0017479	0.5	0.010944	0.4	0.0127811
10	TTC18	0.3	0.00150845	0.3	0.00424369	0.3	0.175437	0.3	0.359888
6	PSMG4	0.3	0.00151509	0.3	0.000617616	0.3	0.0082594	0.3	0.00142643
9	TTLL11	0.3	0.00152172	0.3	0.0011713	0.4	0.00559413	0.3	0.00548797
12	SCARB1	0.3	0.00152956	0.4	0.00328651	0.3	0.0108819	0.3	0.00525818
14	ABCD4	0.3	0.00154223	0.3	0.00034379	0.5	0.0453881	0.5	0.0744957
12	RBM19	0.3	0.00155007	0.3	0.000861888	0.3	0.0171684	0.3	0.00678473
2	VIT	0.5	0.00155429	0.3	0.0016333	0.3	0.00325816	0.5	0.0168415
16	SLC7A5	0.5	0.00158746	0.3	0.00238542	0.3	0.00885048	0.3	0.00727327
17	APPBP2	0.5	0.00159289	0.3	0.00119904	0.3	0.630212	0.3	0.637849
17	MIS12	0.5	0.00162365	0.5	0.00143608	0.3	0.012131	0.3	0.00496626
3	MAGI1	0.3	0.00163994	0.3	0.00162788	0.3	0.00930706	0.5	0.00596626
12	LST3	0.3	0.00164959	0.5	0.00143909	0.3	0.00739571	0.3	0.00620209
12	SLCO1B3	0.3	0.00164959	0.5	0.00143909	0.3	0.00739571	0.3	0.00620209
12	SLCO1B7	0.3	0.00164959	0.5	0.00143909	0.3	0.00739571	0.3	0.00620209
2	WDR75	0.3	0.00165683	0.3	0.00224308	0.3	0.0519437	0.3	0.0159537
6	GTF3C6	0.5	0.00165984	0.3	0.00132088	0.3	0.00475516	0.3	0.00950971
14	DAD1	0.3	0.00166768	0.3	0.00108445	0.3	0.0368115	0.3	0.020704
8	RP11-463D19.2	0.3	0.0016707	0.3	0.00280641	0.3	0.0487699	0.3	0.079664
1	OR2B11	0.4	0.00167251	0.4	0.00383778	0.3	0.00778232	0.3	0.00352897
16	CMIP	0.3	0.00168759	0.3	0.00279495	0.3	0.0200152	0.5	0.0327379
13	CARS2	0.5	0.00168819	0.5	0.00118638	0.3	0.0046092	0.3	0.00512187
2	MBD5	0.5	0.0016894	0.5	0.00141256	0.3	0.00697472	0.3	0.000599521
13	LHFP	0.5	0.00169181	0.4	0.00177142	0.3	0.0105453	0.5	0.00628412
22	MYO18B	0.3	0.00170387	0.3	0.00193729	0.5	0.0112178	0.5	0.0098523
12	TEAD4	0.4	0.00171171	0.5	0.00235888	0.3	0.0556717	0.3	0.0362819
15	ADAMTS17	0.5	0.00172498	0.5	0.000935471	0.5	0.00477325	0.4	0.00394454
5	PAPD4	0.5	0.00174971	0.5	0.00117371	0.3	0.0253554	0.3	0.0130652
3	MCF2L2	0.3	0.0017666	0.3	0.00110737	0.3	0.0110773	0.3	0.00893975
5	ZNF879	0.5	0.00177323	0.5	0.00167311	0.4	0.00247167	0.3	0.0125966
15	FAM174B	0.3	0.00177745	0.3	0.0015368	0.3	0.00907183	0.4	0.00298253
6	GRIK2	0.5	0.00178771	0.5	0.00179736	0.3	0.00277264	0.3	0.00313573
6	OFCC1	0.4	0.00180761	0.5	0.00141376	0.3	0.00126237	0.3	0.00123402
22	SYCE3	0.3	0.00181063	0.3	0.000595299	0.5	0.112079	0.5	0.106652
10	KIAA1217	0.3	0.00182812	0.3	0.00157601	0.5	0.0043782	0.3	0.00391076
11	MS4A6E	0.5	0.00183656	0.4	0.00297469	0.4	0.00185285	0.3	0.00277746
2	LPIN1	0.5	0.0018432	0.3	0.00141919	0.3	0.0109723	0.4	0.00970272
20	PTPRT	0.5	0.00184501	0.5	0.00194573	0.3	0.00325274	0.3	0.00329978
21	COL18A1	0.3	0.00188783	0.3	0.000960199	0.3	0.0427289	0.3	0.0437639
16	ABAT	0.5	0.00189567	0.5	0.00200665	0.3	0.00160918	0.4	0.00268639
10	PYROXD2	0.5	0.00189869	0.5	0.00243608	0.3	0.00196805	0.3	0.00398435
4	LYAR	0.5	0.00190472	0.5	0.0045127	0.3	0.00122377	0.3	0.00134199
13	FLT3	0.5	0.00191195	0.5	0.00172076	0.3	0.00500064	0.3	0.00790838
5	FAM173B	0.3	0.00192462	0.3	0.00360014	0.3	0.00700306	0.3	0.00974072
21	CLDN14	0.3	0.00193487	0.5	0.00528411	0.3	0.0146032	0.3	0.0152311
8	SLC25A37	0.4	0.00193789	0.5	0.00158083	0.3	0.00507482	0.3	0.00417192
2	HECW2	0.5	0.0019403	0.3	0.000947533	0.3	0.00236974	0.3	0.018239
5	IRF1	0.5	0.00196865	0.5	0.00196383	0.3	0.00143366	0.4	0.000811224
14	PTPN21	0.5	0.00197227	0.5	0.0013257	0.3	0.00207299	0.3	0.00148372
9	SPATA6L	0.3	0.00197709	0.3	0.00301088	0.5	0.00691138	0.5	0.00440111
15	AVEN	0.4	0.00198795	0.4	0.00289387	0.3	0.00656759	0.4	0.00526662
1	CNTN2	0.3	0.00199579	0.3	0.00373766	0.4	0.0223554	0.5	0.0246274
8	KIAA0196	0.5	0.00203801	0.5	0.00248494	0.3	0.0769281	0.3	0.0450721
9	SLC25A25	0.5	0.00204826	0.5	0.00196443	0.3	0.0528429	0.3	0.0172492
1	MYSM1	0.3	0.00205249	0.3	0.0027654	0.3	0.0132534	0.3	0.00840597
2	SMC6	0.3	0.00205309	0.3	0.00248072	0.5	0.0849746	0.5	0.0247245
6	SYCP2L	0.3	0.00208506	0.3	0.00195297	0.3	0.0132498	0.5	0.0179923
21	LCA5L	0.5	0.00208747	0.3	0.0052057	0.3	0.00238301	0.3	0.00203439
21	WRB	0.5	0.00208747	0.3	0.0052057	0.3	0.00238301	0.3	0.00203439
1	EPHB2	0.3	0.00209772	0.3	0.00604769	0.3	0.0178439	0.3	0.0218451
3	PLD1	0.5	0.00211823	0.3	0.00188481	0.3	0.00221533	0.3	0.0107769
6	NOTCH4	0.3	0.00212667	0.4	0.00650728	0.4	0.00571837	0.3	0.00293247
13	NBEA	0.5	0.00214718	0.5	0.00212486	0.3	0.00313331	0.3	0.00911828
1	OR6K6	0.3	0.00218216	0.3	0.0011339	0.3	0.241242	0.5	0.273686
10	AFAP1L2	0.3	0.00218397	0.5	0.00169	0.3	0.0105646	0.3	0.00939572
1	ALPL	0.3	0.00219	0.3	0.00319363	0.3	0.00753986	0.3	0.0123656
14	TMEM179	0.3	0.00220448	0.3	0.00105791	0.5	0.0112456	0.5	0.0139096
22	CECR2	0.3	0.00221775	0.3	0.00277083	0.5	0.0101219	0.5	0.0103234
10	ABCC2	0.5	0.00222317	0.5	0.0037841	0.5	0.00250484	0.5	0.00216166
5	SLC36A2	0.5	0.00222559	0.3	0.00114597	0.5	0.00300243	0.5	0.00417072
7	CPA5	0.3	0.00223644	0.3	0.00269785	0.3	0.00351209	0.3	0.00301329
10	ITIH5	0.5	0.00223825	0.5	0.00219845	0.5	0.00686916	0.3	0.0042636
1	ACTL8	0.3	0.00224851	0.3	0.00259169	0.3	0.00445419	0.3	0.0100145
4	APBB2	0.3	0.00225454	0.5	0.00238482	0.3	0.0153903	0.3	0.00498194
4	LINC01098	0.3	0.00225876	0.5	0.00151449	0.5	0.00725095	0.5	0.0054361
7	ABCB5	0.3	0.00226057	0.3	0.00448857	0.5	0.00896025	0.3	0.00923589
21	KRTAP10-7	0.5	0.00226419	0.4	0.0020748	0.3	0.299742	0.3	0.272829
10	PLXDC2	0.4	0.00227022	0.4	0.00372379	0.3	0.00339568	0.3	0.0022467
17	EXOC7	0.4	0.00227324	0.3	0.00254827	0.5	0.0310382	0.5	0.0321769
4	DDIT4L	0.3	0.00228108	0.5	0.00376601	0.3	0.0035525	0.3	0.0015169
2	ZSWIM2	0.5	0.00228892	0.5	0.00262909	0.3	0.0107287	0.3	0.00336492
4	CCDC149	0.3	0.00232631	0.3	0.00167492	0.3	0.00748316	0.3	0.00287034
2	MLPH	0.5	0.00233476	0.5	0.00220749	0.3	0.0161177	0.3	0.0313609
1	37316	0.4	0.00233898	0.5	0.00298856	0.3	0.00731368	0.3	0.0246799
14	CATSPERB	0.3	0.00235044	0.3	0.00222499	0.3	0.000731609	0.3	0.00446324
14	EFCAB11	0.3	0.00235647	0.3	0.0022859	0.3	0.0132287	0.3	0.011102
9	PRUNE2	0.3	0.00241377	0.3	0.00151991	0.3	0.00466167	0.3	0.00998861
19	FBXO27	0.3	0.0024204	0.3	0.00522862	0.3	0.00456818	0.3	0.00446746
4	TLR10	0.5	0.00242523	0.5	0.0019777	0.3	0.0142299	0.4	0.00944638
12	IFLTD1	0.5	0.00243608	0.5	0.0019391	0.3	0.0158379	0.3	0.00522621
1	CDA	0.3	0.00243789	0.4	0.00477144	0.5	0.00935169	0.3	0.0103692
16	GSG1L	0.5	0.00246503	0.5	0.00333657	0.4	0.00534563	0.4	0.00599341
22	SCUBE1	0.5	0.00248795	0.5	0.00324429	0.3	0.00160978	0.4	0.00193125
6	TRDN	0.5	0.00250002	0.5	0.00255792	0.3	0.00871839	0.3	0.00291437
5	CDH9	0.5	0.00250243	0.5	0.00128409	0.5	0.0100224	0.5	0.011526
7	DGKI	0.3	0.00251389	0.5	0.000643551	0.5	0.0179519	0.5	0.0117781
18	NFATC1	0.4	0.00252173	0.3	0.0021122	0.3	0.00517555	0.3	0.0162396
2	FAM179A	0.5	0.00252294	0.5	0.00287034	0.3	0.0112449	0.3	0.0202287
3	CCDC39	0.3	0.00253017	0.3	0.000934867	0.5	0.00847473	0.5	0.00980163
6	KCNK16	0.5	0.00254646	0.5	0.00370087	0.5	0.00335467	0.3	0.00239386
14	FLRT2	0.5	0.00254706	0.5	0.00219724	0.3	0.00327143	0.3	0.00617555
13	NALCN	0.5	0.00254947	0.5	0.00279013	0.3	0.00404044	0.3	0.00221292
7	SNX10	0.5	0.00256274	0.5	0.0035537	0.3	0.00485287	0.3	0.00493972
13	GRTP1	0.3	0.00256878	0.5	0.00195116	0.3	0.109686	0.3	0.0389007
10	ATE1	0.3	0.00257179	0.4	0.00183777	0.3	0.0114512	0.3	0.01645
5	TNFAIP8	0.3	0.002573	0.3	0.00472018	0.3	0.0106665	0.3	0.0117679
12	ALDH1L2	0.5	0.00257963	0.3	0.00358084	0.5	0.00270689	0.4	0.00302173
12	C12orf45	0.5	0.00257963	0.3	0.00358084	0.5	0.00270689	0.4	0.00302173
5	RANBP17	0.3	0.00258988	0.5	0.00361402	0.3	0.00552778	0.3	0.00613273
1	FMO2	0.3	0.0025929	0.3	0.00226419	0.3	0.00826905	0.3	0.00510015
3	ZNF717	0.5	0.00260738	0.5	0.00621295	0.5	0.00248916	0.4	0.0034005
10	MPP7	0.5	0.00262547	0.5	0.00303018	0.3	0.00419002	0.3	0.00448555
4	NPFFR2	0.3	0.00264537	0.3	0.00154706	0.5	0.0167993	0.5	0.0185858
1	RGS7	0.3	0.00266829	0.5	0.00175815	0.3	0.00532935	0.3	0.00349399
4	TMPRSS11F	0.5	0.00267251	0.4	0.0028432	0.3	0.00526843	0.3	0.00605915
6	GMDS	0.3	0.00268397	0.3	0.00388362	0.3	0.0026882	0.4	0.00290774
18	CYB5A	0.3	0.0026894	0.3	0.000914964	0.3	0.0119808	0.3	0.0414617
12	C12orf56	0.5	0.00269121	0.5	0.00418338	0.5	0.0140912	0.5	0.0066454
1	DAB1	0.3	0.00274911	0.3	0.00533297	0.3	0.00692284	0.5	0.00597953
3	BRK1	0.3	0.00275695	0.5	0.00150001	0.3	0.0106165	0.3	0.0332258
1	SLC2A5	0.5	0.00277022	0.5	0.00281908	0.5	0.00296323	0.4	0.00413694
4	NAAA	0.3	0.00277686	0.3	0.00349218	0.3	0.00484744	0.3	0.000524129
10	ZNF365	0.4	0.00277806	0.5	0.00127504	0.4	0.00192945	0.3	0.00171171
2	DNER	0.3	0.00278711	0.3	0.00304103	0.4	0.00701814	0.3	0.00322559
1	MINOS1-NBL1	0.5	0.00281305	0.5	0.00252113	0.3	0.0644437	0.3	0.0531276
1	MINOS1	0.5	0.00281305	0.5	0.00252113	0.5	0.117534	0.5	0.150624
12	SART3	0.3	0.00282752	0.3	0.00285587	0.3	0.00397831	0.3	0.00327083
9	MOB3B	0.5	0.00283235	0.5	0.002228	0.5	0.008298	0.5	0.00541379
8	MTUS1	0.5	0.00284863	0.5	0.00269966	0.3	0.00734504	0.3	0.0116913
13	FLT1	0.5	0.00287577	0.5	0.00467675	0.3	0.00722019	0.3	0.00750789
2	RAB17	0.5	0.0028806	0.5	0.00214899	0.3	0.0142769	0.3	0.011488
12	NT5DC3	0.3	0.0028812	0.3	0.00543188	0.3	0.00285647	0.3	0.00352053
8	OXR1	0.5	0.0028818	0.5	0.00333114	0.3	0.00734082	0.3	0.0072401
2	UPP2	0.5	0.00289447	0.5	0.00137034	0.3	0.0196648	0.5	0.019584
1	MGST3	0.3	0.00289628	0.3	0.00306335	0.4	0.0152703	0.3	0.00789993
9	ROR2	0.3	0.00291799	0.3	0.00103258	0.3	0.00844758	0.3	0.00578834
6	ZNF184	0.5	0.00294152	0.5	0.00198373	0.3	0.00407602	0.3	0.00590595
4	MSMO1	0.4	0.00295961	0.4	0.00327867	0.4	0.0320684	0.5	0.0347397
16	TEKT5	0.3	0.00296262	0.3	0.00082389	0.4	0.00616651	0.3	0.00664721
8	DLC1	0.3	0.0029771	0.3	0.000681549	0.3	0.00314055	0.5	0.00968643
2	RAB11FIP5	0.3	0.00298072	0.3	0.00220146	0.5	0.0095459	0.3	0.00891502
3	ARHGEF3	0.3	0.00300424	0.3	0.00757966	0.3	0.00540534	0.5	0.0156786
20	RP11-352D3.2	0.3	0.00300484	0.3	0.00248011	0.3	0.00798618	0.3	0.0113119
12	PRICKLE1	0.3	0.00301088	0.5	0.00483598	0.5	0.0113246	0.5	0.0107063
1	IFI16	0.5	0.00301269	0.3	0.0042256	0.3	0.013938	0.3	0.00827569
18	LINC00908	0.3	0.00302354	0.3	0.00274007	0.3	0.00369182	0.3	0.00200303
11	ABTB2	0.3	0.00302475	0.3	0.00163753	0.3	0.00256878	0.3	0.00356516
10	AIFM2	0.3	0.00302595	0.3	0.00388784	0.3	0.0947123	0.3	0.0516234
8	SLCO5A1	0.3	0.00306214	0.4	0.00665324	0.4	0.00405913	0.5	0.00426842
11	NADSYN1	0.5	0.00306275	0.3	0.00198011	0.3	0.00360437	0.3	0.00779981
5	ARHGEF37	0.3	0.00306637	0.4	0.00314779	0.5	0.0135755	0.3	0.00703865
1	CHIA	0.3	0.00309411	0.3	0.00266166	0.5	0.00470208	0.3	0.00419665
18	SERPINB5	0.4	0.00311643	0.3	0.000576602	0.4	0.00571174	0.4	0.00552416
3	PRICKLE2	0.5	0.00311944	0.5	0.00219242	0.3	0.00924071	0.5	0.0146666
11	GRM5	0.3	0.00311944	0.3	0.00267855	0.3	0.0062811	0.3	0.00531608
2	DIRC3	0.3	0.00312366	0.4	0.00368639	0.3	0.00254827	0.3	0.00388121
15	ITGA11	0.3	0.00313814	0.3	0.00382451	0.3	0.0122787	0.5	0.0225219
6	COL9A1	0.3	0.00314658	0.3	0.00271896	0.5	0.00448857	0.5	0.00352415
11	PPFIBP2	0.3	0.00315201	0.3	0.00328953	0.5	0.00310014	0.5	0.00337517
7	ANKRD61	0.3	0.00316287	0.3	0.00702779	0.3	0.00789933	0.3	0.00879801
7	EIF2AK1	0.3	0.00316287	0.3	0.00702779	0.3	0.00789933	0.3	0.00879801
4	36951	0.5	0.0031689	0.5	0.00263572	0.3	0.0137679	0.4	0.00977992
1	SMG7	0.5	0.00318518	0.5	0.00225816	0.5	0.0161527	0.5	0.00617555
1	NCF2	0.5	0.00318518	0.5	0.00225816	0.5	0.0339906	0.5	0.036768
8	ADAM28	0.3	0.0032274	0.3	0.00385588	0.3	0.0116038	0.3	0.0559618
11	PRR5L	0.3	0.00322861	0.3	0.00284682	0.3	0.025508	0.3	0.0254803
21	MRPL39	0.3	0.00323826	0.3	0.0054741	0.3	0.0454056	0.3	0.0349815
1	HMCN1	0.3	0.00323886	0.3	0.0026508	0.5	0.0215285	0.5	0.0230768
18	TXNL1	0.5	0.00325093	0.5	0.00515504	0.3	0.0946954	0.3	0.0814239
5	ARL14EPL	0.4	0.00327445	0.4	0.00161702	0.3	0.0020748	0.3	0.00995423
5	CTD-2287O16.3	0.4	0.00327445	0.4	0.00161702	0.3	0.0020748	0.3	0.00995423
14	SPATA7	0.3	0.00329556	0.3	0.00353259	0.3	0.0605312	0.4	0.0526614
2	SCN3A	0.5	0.00330943	0.3	0.00289145	0.3	0.00580945	0.3	0.0063951
8	ANGPT1	0.5	0.00331848	0.5	0.00299158	0.3	0.00308386	0.3	0.00323344
2	PAX3	0.5	0.00332632	0.5	0.00344574	0.3	0.00184259	0.3	0.00202112
18	FHOD3	0.5	0.00334381	0.5	0.0031876	0.5	0.0113963	0.5	0.0108469
5	CTNND2	0.4	0.00336371	0.3	0.00183536	0.3	0.0302451	0.5	0.0328567
18	COLEC12	0.5	0.00336492	0.5	0.00256093	0.4	0.0101502	0.3	0.00642103
18	SERPINB10	0.3	0.00342885	0.4	0.00395841	0.3	0.0386348	0.3	0.004187
12	RP11-234B24.6	0.5	0.00343187	0.5	0.00531065	0.5	0.00322017	0.5	0.00335648
6	RP1-102H19.8	0.5	0.00343368	0.3	0.0028806	0.5	0.00587881	0.3	0.00545299
6	C6orf164	0.5	0.00343368	0.3	0.0028806	0.3	0.00605432	0.3	0.00545299
3	SSUH2	0.3	0.00346323	0.3	0.00291498	0.3	0.0253934	0.3	0.00753744
2	HS1BP3	0.3	0.00346926	0.3	0.00170387	0.3	0.00946146	0.3	0.00648135
15	GANC	0.3	0.00347288	0.5	0.00223282	0.3	0.18634	0.3	0.0320153
20	CYP24A1	0.3	0.0034771	0.5	0.00165803	0.3	0.0048794	0.3	0.00696386
18	WDR7	0.5	0.0035145	0.5	0.00692284	0.3	0.0103577	0.4	0.00746507
22	SYNGR1	0.3	0.00356697	0.3	0.00366408	0.3	0.0131521	0.5	0.00968764
9	IGFBPL1	0.3	0.00358808	0.3	0.00492343	0.3	0.00300786	0.3	0.00260014
12	PTPRQ	0.5	0.00358929	0.5	0.00459834	0.3	0.00341257	0.4	0.00226962
12	GALNT9	0.3	0.00363995	0.3	0.00438121	0.5	0.00581005	0.5	0.00492162
7	EPDR1	0.5	0.00365081	0.4	0.00366709	0.3	0.00272499	0.3	0.00749703
7	NME8	0.5	0.00365081	0.4	0.00366709	0.3	0.00272499	0.3	0.00749703
1	C1orf110	0.4	0.00376842	0.4	0.00555613	0.3	0.011523	0.5	0.00784987
5	ATP10B	0.5	0.00377807	0.3	0.00562127	0.3	0.00662248	0.3	0.00745783
15	CORO2B	0.5	0.00378953	0.3	0.00543007	0.5	0.0192233	0.3	0.00658328
10	NRP1	0.5	0.00379436	0.3	0.00360799	0.3	0.00387035	0.3	0.00511704
1	ARPC5	0.3	0.00384321	0.3	0.00051086	0.3	0.160269	0.3	0.211185
4	SCARB2	0.5	0.00384743	0.5	0.00246503	0.3	0.0161636	0.3	0.0470944
10	ITGA8	0.5	0.00389206	0.3	0.00267613	0.5	0.0113909	0.3	0.0133897
19	CARD8	0.3	0.00389448	0.3	0.00518399	0.3	0.00533478	0.3	0.00463453
19	ZNF114	0.3	0.00389448	0.3	0.00518399	0.3	0.00533478	0.3	0.00463453
5	STK10	0.5	0.00392524	0.3	0.00282873	0.3	0.00863697	0.5	0.0101907
7	LHFPL3	0.3	0.00396746	0.3	0.00436191	0.5	0.0158475	0.5	0.00947895
5	FSTL4	0.3	0.00398073	0.5	0.00482452	0.4	0.00441438	0.3	0.00483538
20	BCAS4	0.5	0.00401631	0.4	0.00430883	0.3	0.0125363	0.3	0.0163921
2	SPP2	0.3	0.00403802	0.3	0.00640776	0.3	0.00644878	0.3	0.0162691
10	ARHGAP19-SLIT1	0.5	0.00406094	0.5	0.00330219	0.3	0.00758147	0.3	0.00929379
10	SLIT1	0.5	0.00406094	0.5	0.00330219	0.3	0.00758147	0.3	0.00929379
1	GLIS1	0.5	0.00407542	0.5	0.00392282	0.3	0.00171774	0.3	0.00452536
11	C11orf74	0.3	0.0041104	0.3	0.00308205	0.3	0.00588605	0.3	0.00690716
15	MEF2A	0.5	0.00419906	0.3	0.00711404	0.3	0.0305593	0.3	0.0143342
19	EXOC3L2	0.3	0.004263	0.3	0.00325394	0.4	0.0292197	0.5	0.0198294
14	SYNE3	0.3	0.00426661	0.5	0.00435889	0.5	0.00377144	0.3	0.00378169
1	CHD5	0.5	0.00427687	0.3	0.00438724	0.5	0.00173463	0.3	0.00296202
12	TRHDE	0.5	0.0042823	0.3	0.00677327	0.3	0.00913275	0.5	0.00777146
16	XYLT1	0.5	0.00430582	0.5	0.00296082	0.3	0.00626663	0.3	0.00567857
1	HHIPL2	0.5	0.00433959	0.3	0.00300786	0.3	0.0071647	0.3	0.00905555
15	NEDD4	0.3	0.00435045	0.3	0.00153258	0.3	0.0113107	0.3	0.00116044
2	TMEM163	0.3	0.00436794	0.4	0.00436674	0.5	0.00269966	0.5	0.00361824
14	PPP2R5E	0.3	0.00444635	0.3	0.00272619	0.3	0.0380551	0.3	0.0141255
7	CD36	0.4	0.0044554	0.3	0.00529979	0.5	0.00757846	0.5	0.00591439
14	KCNK10	0.3	0.00445781	0.3	0.0035537	0.3	0.00894698	0.3	0.00392463
14	RPGRIP1	0.3	0.00446083	0.3	0.0032847	0.3	0.0278512	0.3	0.0147395
21	DIP2A	0.3	0.00448194	0.3	0.00301329	0.5	0.010915	0.5	0.0135103
8	SNTG1	0.5	0.00448616	0.5	0.00250967	0.5	0.00280581	0.5	0.00351389
2	ARHGAP15	0.5	0.00450003	0.3	0.00675638	0.5	0.0175954	0.3	0.00233657
14	AKAP6	0.4	0.00450124	0.4	0.00279495	0.3	0.00245961	0.3	0.00343006
15	TICRR	0.5	0.00452476	0.3	0.00579015	0.3	0.0240213	0.5	0.0259567
12	SVOP	0.5	0.00454768	0.5	0.0035718	0.3	0.00598677	0.4	0.00622079
18	FBXO15	0.4	0.00460377	0.3	0.00580824	0.3	0.162845	0.3	0.172615
18	TIMM21	0.4	0.00460377	0.3	0.00580824	0.3	0.218004	0.3	0.322761
11	PAMR1	0.5	0.00461644	0.3	0.00310316	0.3	0.00315804	0.3	0.00254284
2	CCDC88A	0.3	0.00464297	0.3	0.00282631	0.5	0.00776664	0.3	0.0118149
11	OR52H1	0.5	0.00469545	0.5	0.00308084	0.3	0.00498254	0.5	0.0034379
5	MIER3	0.3	0.00480944	0.5	0.0060881	0.3	0.0158119	0.3	0.00790476
18	MPPE1	0.5	0.00481246	0.5	0.0033607	0.3	0.00733419	0.3	0.00707242
2	COLEC11	0.3	0.00483839	0.5	0.00536976	0.5	0.00866652	0.3	0.00957184
12	TESC	0.3	0.0048776	0.3	0.00142401	0.3	0.00860742	0.3	0.00808992
5	FAM81B	0.5	0.0050712	0.5	0.0047256	0.3	0.00450727	0.4	0.00662369
15	CHRM5	0.5	0.00508869	0.3	0.00373706	0.3	0.00656759	0.4	0.00526662
10	MALRD1	0.5	0.00512911	0.3	0.00342463	0.3	0.00358084	0.3	0.00607242
9	KIAA0020	0.3	0.00513152	0.3	0.00274851	0.3	0.114165	0.5	0.119035
9	KCNV2	0.3	0.00513152	0.3	0.00274851	0.5	0.376223	0.5	0.486814
7	DGKB	0.3	0.00514841	0.5	0.00211461	0.3	0.003725	0.5	0.00781368
1	AUNIP	0.5	0.00521777	0.3	0.00478049	0.3	0.00173403	0.3	0.00719426
19	ZNF675	0.3	0.00528049	0.3	0.00226479	0.5	0.0411263	0.3	0.0561686
15	SPRED1	0.3	0.00528653	0.3	0.00302535	0.3	0.05977	0.3	0.00833721
5	IRGM	0.3	0.00530703	0.5	0.00319725	0.3	0.072454	0.3	0.00409532
21	KCNJ6	0.5	0.00540353	0.5	0.00516952	0.5	0.00531065	0.5	0.004225
12	ST8SIA1	0.3	0.00542464	0.3	0.000919186	0.5	0.00606156	0.3	0.00198976
12	A2ML1	0.3	0.00543671	0.3	0.00533538	0.3	0.0181304	0.5	0.0238011
16	KIAA0513	0.5	0.00544937	0.4	0.0055127	0.3	0.0191618	0.4	0.0139597
16	VAT1L	0.4	0.00545239	0.3	0.00462609	0.3	0.0079132	0.3	0.00460136
10	ARMC4	0.3	0.00545902	0.5	0.00432632	0.3	0.00508869	0.3	0.00390352
10	MYPN	0.3	0.00550908	0.3	0.00706579	0.5	0.0044174	0.5	0.00341981
1	TMCO4	0.4	0.00551692	0.4	0.0028625	0.3	0.00381728	0.3	0.00486493
19	ZNF780A	0.3	0.00573104	0.3	0.00628955	0.3	0.428105	0.3	0.049361
15	CERS3	0.3	0.00583719	0.3	0.00760379	0.5	0.0056472	0.5	0.00455009
2	SMYD1	0.5	0.00583779	0.5	0.00430582	0.3	0.00568822	0.3	0.00838305
5	MCC	0.3	0.00590897	0.3	0.00602658	0.3	0.0113113	0.3	0.00833057
7	ZNF775	0.5	0.00591862	0.3	0.00430099	0.3	0.011953	0.3	0.0145574
7	UBE3C	0.3	0.00605372	0.3	0.00355551	0.3	0.0046484	0.3	0.00540353
2	MDH1B	0.4	0.00606096	0.3	0.002842	0.3	0.0347155	0.3	0.0699359
6	TREML4	0.5	0.00606578	0.4	0.00548194	0.3	0.00918583	0.3	0.00927268
6	UTRN	0.3	0.00616651	0.3	0.00432994	0.5	0.0150345	0.5	0.0257487
1	EGLN1	0.3	0.00627809	0.3	0.00707544	0.3	0.00330702	0.5	0.00254163
11	OR8G5	0.4	0.0063951	0.3	0.00480039	0.5	0.00384683	0.5	0.00531246
3	LEPREL1	0.3	0.00655614	0.3	0.00592284	0.3	0.0036683	0.3	0.00413272
12	TAS2R42	0.3	0.00655734	0.5	0.00604166	0.3	0.0022847	0.3	0.00423525
8	BLK	0.3	0.00666953	0.4	0.00684745	0.5	0.00597229	0.5	0.00891864
10	AKR1C3	0.3	0.00667978	0.3	0.00448676	0.3	0.00418338	0.3	0.00423887
11	CD81	0.5	0.0067027	0.4	0.00248614	0.3	0.297579	0.3	0.432541
6	HBS1L	0.3	0.00678955	0.4	0.00694154	0.5	0.00394936	0.5	0.00561524
1	ITLN1	0.3	0.00684142	0.5	0.00310919	0.3	0.0407717	0.3	0.0353181
14	TTC9	0.3	0.00697652	0.3	0.00748618	0.3	0.00789511	0.3	0.00319001
7	DBNL	0.3	0.00711404	0.4	0.00715445	0.3	0.0277686	0.3	0.0150146
4	ANAPC4	0.3	0.00716229	0.3	0.00577266	0.5	0.00616228	0.5	0.00597169
6	BPHL	0.3	0.00725819	0.3	0.0060109	0.3	0.0785017	0.3	0.0642917
6	GLP1R	0.3	0.00730524	0.3	0.00607	0.5	0.00389086	0.5	0.00419605
17	SPACA3	0.3	0.00736193	0.3	0.00684625	0.4	0.00511644	0.4	0.00882817
8	EXT1	0.3	0.00748075	0.3	0.00490534	0.3	0.0170279	0.3	0.0198771
11	OR52B6	0.3	0.00839451	0.4	0.0101231	0.5	0.00329857	0.5	0.0022853
3	OR5H15	0.3	0.009681	0.3	0.00291136	0.5	0.010865	0.5	0.0241117

## Sheet: Eur_significant
Chr	Acronym	tf.LWK	p.LWK	tf.YRI	p.YRI	tf.GBR	p.GBR	tf.TSI	p.TSI
19	RUNX2	0.5	0.00076056	0.5	0.000948137	0.5	8.75e-05	0.3	0.000144151			opposite signatures in Afr and Eur
17	ADH4	0.3	0.00585106	0.3	0.0345611	0.3	0.000172498	0.3	0.000135103
12	NCK2	0.3	0.00684805	0.5	0.0656518	0.5	0.00020929	0.5	0.000219543
4	OAS1	0.3	0.129543	0.3	0.120159	0.3	0.000226781	0.5	0.000201449
2	ALDH18A1	0.3	0.00355069	0.3	0.0507247	0.5	0.000229796	0.5	0.000397469
9	CRHR1	0.5	0.0136581	0.5	0.0119657	0.3	0.000257541	0.4	0.000222559
13	BCAS1	0.3	0.0133017	0.5	0.0147956	0.3	0.000294332	0.3	0.00191799
12	ADCY3	0.3	0.00271654	0.3	0.0106213	0.5	0.000333537	0.4	0.000930645
17	NUP54	0.4	0.0116382	0.5	0.00902841	0.3	0.000338362	0.3	0.00177263
17	TMEM128	0.3	0.000420389	0.5	0.0321046	0.5	0.00035344	0.4	0.000265985
15	GRAMD4	0.5	0.0065682	0.5	0.00701512	0.5	0.000356456	0.5	0.000360678
17	ATP10D	0.3	0.00158385	0.3	0.00713032	0.3	0.000378169	0.3	0.000618822
5	CLDN10	0.3	0.00147709	0.3	0.00260134	0.3	0.000382994	0.3	0.00138421
17	SLC7A11	0.3	0.00586373	0.3	0.00189627	0.5	0.000406517	0.5	0.00036309
8	CLEC3A	0.3	0.00398193	0.3	0.0100284	0.5	0.000422801	0.3	0.000342584
22	SLC2A8	0.4	0.00156696	0.3	0.000758751	0.5	0.000425817	0.4	0.000962612
19	VNN1	0.5	0.000394454	0.3	0.00121171	0.3	0.000442102	0.3	0.000594093
18	RAB3C	0.3	0.0010754	0.3	0.00931671	0.3	0.000469243	0.3	0.000393247
20	SKAP2	0.5	0.00355431	0.3	0.00193849	0.3	0.000477687	0.3	0.000475275
16	KCNMB2	0.5	0.0186527	0.3	0.0193849	0.5	0.000510257	0.4	0.000805795
6	PELI2	0.3	0.000800367	0.3	0.002728	0.5	0.000516891	0.5	0.000239447
9	MAPT	0.5	0.150406	0.3	0.135361	0.3	0.000541017	0.3	0.000533176
4	CLEC4C	0.3	0.0691048	0.3	0.0223922	0.3	0.000550667	0.3	0.000924011
11	CABP5	0.3	0.0106689	0.3	0.0352578	0.4	0.000587459	0.5	0.000316649
16	RPSA	0.3	0.0694377	0.3	0.0218518	0.3	0.000606156	0.3	0.000919789
9	KANSL1	0.5	0.066226	0.3	0.0472681	0.3	0.000629678	0.3	0.000392041
4	TAS2R20	0.3	0.0979958	0.3	0.0638122	0.3	0.000635107	0.5	0.000845
4	FAM19A2	0.3	0.00776061	0.3	0.0106551	0.3	0.000674914	0.4	0.000868522
17	ATP8A1	0.5	0.0142202	0.5	0.00693068	0.3	0.000675517	0.3	0.000659232
17	DCTD	0.3	0.00109651	0.3	0.00134078	0.5	0.000717737	0.4	0.00120387
3	OR51I2	0.3	0.00490836	0.3	0.00887823	0.4	0.000730403	0.5	0.000612187
2	SORBS1	0.4	0.000925217	0.3	0.00070688	0.5	0.000756338	0.5	0.000740656
20	BBS9	0.5	0.00689631	0.5	0.0104283	0.3	0.000769607	0.3	0.0011719
17	PRDM5	0.5	0.0393839	0.5	0.0420075	0.3	0.000791923	0.3	0.00100362
16	HHLA2	0.3	0.00728171	0.3	0.00238844	0.3	0.00079313	0.3	0.00123342
3	OR2AG1	0.3	0.0178958	0.3	0.0102751	0.3	0.000807002	0.3	0.00113933
6	TMEM229B	0.3	0.0458893	0.3	0.00674612	0.5	0.000836556	0.5	0.00130339
12	HAAO	0.5	0.0137401	0.5	0.0140616	0.3	0.000840174	0.3	0.00123282
3	ZBTB16	0.4	0.00480281	0.4	0.00219121	0.4	0.000844396	0.4	0.000933058
4	PPFIBP1	0.5	0.00198795	0.5	0.00307843	0.4	0.0008643	0.5	0.00267251
18	PRDM6	0.3	0.00923528	0.3	0.00701874	0.3	0.000870935	0.4	0.00160556
17	BMPR1B	0.3	0.00537579	0.3	0.00658629	0.5	0.000892045	0.5	0.000439689
3	CYB5R2	0.3	0.019748	0.3	0.0262438	0.3	0.000893251	0.3	0.00133415
8	SLC12A3	0.4	0.00258144	0.4	0.0031104	0.5	0.00089687	0.5	0.000860078
20	GRM8	0.3	0.000919789	0.3	0.00887159	0.5	0.000939089	0.5	0.000934264
20	RPA3-AS1	0.4	0.00490232	0.3	0.00541318	0.5	0.000941502	0.4	0.00144331
18	FBXL17	0.3	0.0080664	0.3	0.0381703	0.3	0.000965628	0.3	0.000267191
18	MFAP3	0.3	0.00189205	0.3	0.00503863	0.3	0.000981912	0.5	0.0007491
12	NMUR1	0.3	0.0042443	0.3	0.00853866	0.3	0.00100845	0.3	0.000446324
1	CCDC181	0.4	0.00697894	0.5	0.0106515	0.4	0.00102112	0.4	0.00195116
19	OR5V1	0.5	0.00286552	0.5	0.00830524	0.5	0.00103258	0.5	0.00212607
20	ZC3HAV1L	0.5	0.0022479	0.5	0.00243669	0.5	0.00105489	0.5	0.00174971
20	CHRM2	0.3	0.073518	0.3	0.0693455	0.5	0.00106032	0.3	0.000501813
18	C5orf17	0.3	0.000606759	0.3	0.00657906	0.3	0.00107419	0.3	0.0018625
16	CACNA2D3	0.3	0.00630704	0.3	0.00383296	0.3	0.00108807	0.5	0.00263512
18	SLCO6A1	0.4	0.00388422	0.3	0.00225876	0.3	0.00109168	0.4	0.00197106
16	CPA3	0.3	0.00765083	0.3	0.00378832	0.5	0.0010941	0.5	0.00125936
3	ABCC8	0.3	0.000887823	0.3	0.000858269	0.3	0.0010953	0.3	0.00116587
19	BTNL2	0.5	0.0132661	0.3	0.000382994	0.3	0.00110073	0.3	0.0018444
12	SP100	0.3	0.00397831	0.3	0.0422379	0.3	0.00112968	0.3	0.0017666
21	EIF3E	0.5	0.00603804	0.5	0.00711223	0.5	0.00114174	0.4	0.00182993
3	OR51E1	0.3	0.00788968	0.3	0.00537941	0.3	0.00114355	0.5	0.00141316
19	GABRR1	0.5	0.00240593	0.5	0.00127805	0.5	0.00116708	0.5	0.00119422
8	ATP2C2	0.3	0.00220267	0.4	0.00378832	0.5	0.00116889	0.5	0.00109771
10	EMILIN2	0.5	0.00463453	0.4	0.00377807	0.4	0.0011713	0.4	0.00107178
8	BANP	0.3	0.00350123	0.3	0.00851875	0.5	0.0011912	0.5	0.0011134
13	OTOR	0.3	0.00185526	0.3	0.00914119	0.5	0.00119301	0.3	0.0011713
22	DAPK1	0.3	0.00652477	0.5	0.0104012	0.3	0.00120869	0.3	0.00167733
18	ARSB	0.3	0.00194272	0.4	0.00208445	0.3	0.00121412	0.3	0.00063571
3	KIRREL3	0.3	0.00609473	0.3	0.00555372	0.3	0.00123222	0.3	0.000853444
1	FHAD1	0.4	0.00923709	0.5	0.0122691	0.5	0.00124488	0.5	0.00177866
22	SVEP1	0.3	0.00486614	0.3	0.00198795	0.3	0.00129675	0.3	0.00119603
16	TNFSF10	0.3	0.00162788	0.3	0.00513936	0.5	0.00129977	0.3	0.00191316
20	PUS7	0.5	0.0447096	0.3	0.0336112	0.3	0.00130037	0.3	0.000661042
3	C1QTNF5	0.5	0.00299158	0.5	0.00289145	0.5	0.00130037	0.4	0.00156635
3	MFRP	0.5	0.00299158	0.5	0.00289145	0.5	0.00130037	0.4	0.00156635
11	ZNF254	0.3	0.00697351	0.3	0.0101967	0.3	0.00130158	0.3	0.00135526
10	ZBTB7C	0.3	0.003304	0.4	0.00488001	0.5	0.00130761	0.3	0.000658026
1	RP5-1052I5.2	0.5	0.0020362	0.4	0.00444575	0.4	0.00130881	0.3	0.00163632
19	KIAA0319	0.5	0.0039759	0.3	0.00295478	0.5	0.00135948	0.3	0.00176117
16	CHL1	0.3	0.00429798	0.3	0.00769064	0.3	0.00136068	0.3	0.00178168
15	MOV10L1	0.5	0.0365889	0.3	0.0228041	0.3	0.00136732	0.3	0.00254344
14	RBM11	0.5	0.00475636	0.4	0.00135948	0.3	0.00137576	0.3	0.000951755
2	SORCS3	0.5	0.00892105	0.5	0.0093342	0.5	0.00138602	0.5	0.00115743
3	CWF19L2	0.3	0.0116768	0.3	0.00940175	0.5	0.00141678	0.3	0.00252475
7	SEMA6D	0.3	0.0136473	0.3	0.00483477	0.5	0.00142944	0.5	0.00110495
22	FBP2	0.3	0.00352234	0.5	0.00329556	0.5	0.00143065	0.4	0.00300062
19	PPP1R14C	0.3	0.00517555	0.3	0.0046858	0.3	0.00145538	0.3	0.00345841
19	ADAT2	0.3	0.0017473	0.3	0.0027853	0.3	0.00146925	0.3	0.00177685
6	TMEM63C	0.3	0.00405009	0.3	0.011251	0.3	0.00147226	0.3	0.00181787
11	ZNF85	0.3	0.00892587	0.3	0.0481825	0.3	0.00148131	0.3	0.00266769
16	UTS2B	0.3	0.00315261	0.3	0.00405612	0.5	0.00148192	0.5	0.00230339
1	PPIE	0.5	0.00527145	0.3	0.00813033	0.3	0.00148795	0.3	0.00166527
10	PIGN	0.5	0.0080477	0.5	0.013052	0.4	0.00149217	0.3	0.00164838
19	FARS2	0.3	0.00616289	0.5	0.00367011	0.3	0.00149337	0.3	0.00353018
20	CUX1	0.3	0.00303862	0.5	0.00344634	0.5	0.00149639	0.5	0.0012859
2	CAMK1D	0.5	0.00644938	0.4	0.00236974	0.4	0.0014976	0.5	0.00151509
22	GRIN3A	0.5	0.00329375	0.5	0.00417132	0.4	0.00150061	0.5	0.00136551
19	RCAN2	0.3	0.00322439	0.3	0.0130302	0.5	0.00150303	0.5	0.00240412
17	PSAPL1	0.3	0.0047443	0.3	0.00438061	0.3	0.00150604	0.3	0.00244875
12	ADD2	0.5	0.00331184	0.5	0.00375334	0.3	0.00150785	0.3	0.000799161
1	RGSL1	0.5	0.00156817	0.5	0.00309351	0.5	0.00151087	0.5	0.00255249
12	WDPCP	0.5	0.0240345	0.5	0.0221153	0.4	0.00152112	0.3	0.00321715
21	RNF19A	0.3	0.00573225	0.3	0.00672019	0.5	0.00152715	0.3	0.00153801
20	CHN2	0.3	0.0116026	0.3	0.00752538	0.3	0.00152836	0.3	0.00115019
4	TSPAN9	0.3	0.00354285	0.3	0.00258446	0.4	0.00153499	0.5	0.00103499
20	LSM5	0.3	0.00594998	0.3	0.00438604	0.3	0.00155007	0.3	0.00217312
12	KCNJ3	0.5	0.00519847	0.5	0.00684504	0.5	0.0015555	0.5	0.00190653
16	TNIK	0.5	0.00198614	0.5	0.00257481	0.5	0.0015561	0.5	0.00108143
12	IL1RN	0.5	0.0614648	0.5	0.0392898	0.3	0.00155791	0.3	0.00244272
1	F5	0.3	0.00415142	0.3	0.00268036	0.3	0.00155972	0.3	0.00126479
20	KLHL7	0.3	0.0109747	0.3	0.00760319	0.3	0.00157842	0.3	0.00216407
21	PNOC	0.5	0.251927	0.5	0.168632	0.5	0.0015941	0.3	0.00115743
17	FAM47E	0.3	0.00394997	0.3	0.00476903	0.5	0.0016134	0.5	0.00179193
17	FAM47E-STBD1	0.3	0.00562549	0.3	0.00476903	0.5	0.0016134	0.5	0.00179193
1	ST6GALNAC3	0.5	0.00162064	0.5	0.00169965	0.5	0.00161581	0.5	0.00164115
22	COL27A1	0.5	0.0103445	0.3	0.0113384	0.3	0.00161642	0.3	0.00256093
9	LLGL2	0.3	0.00645239	0.5	0.00480462	0.5	0.00163572	0.5	0.00176539
11	LGALS7B	0.3	0.00600366	0.3	0.00322559	0.3	0.00163572	0.3	0.00245418
4	RP11-362K2.2	0.5	0.00318458	0.5	0.00448133	0.3	0.00166346	0.3	0.00195056
21	NDUFAF6	0.3	0.00811827	0.5	0.00492283	0.5	0.00166949	0.5	0.00234742
17	FAM13A	0.5	0.00311703	0.5	0.00190954	0.5	0.00168397	0.3	0.00238361
21	TMEM71	0.3	0.0109156	0.3	0.0141032	0.5	0.00173644	0.5	0.00122799
22	NMRK1	0.3	0.0766392	0.3	0.0407675	0.3	0.00173946	0.3	0.00449521
21	KCNQ3	0.5	0.00249459	0.4	0.00374249	0.3	0.00174428	0.3	0.00161581
10	NETO1	0.3	0.017166	0.3	0.00792526	0.3	0.00175996	0.5	0.00196624
10	CDH7	0.3	0.00656699	0.3	0.0128831	0.3	0.00177022	0.3	0.00237999
9	RP11-477N12.3	0.3	0.00565987	0.3	0.00897111	0.3	0.00178771	0.3	0.00159289
9	MYO1D	0.4	0.00679618	0.5	0.00705493	0.5	0.00180158	0.5	0.00175031
6	SERPINA5	0.3	0.00709474	0.3	0.00724975	0.3	0.00180641	0.3	0.00271413
18	ADCY2	0.5	0.00350726	0.3	0.0121032	0.5	0.00181304	0.5	0.00233838
11	RPS9	0.3	0.0237565	0.4	0.0331245	0.5	0.00182631	0.5	0.0016134
22	AK3	0.3	0.00584805	0.3	0.00735771	0.5	0.00182752	0.5	0.00190954
19	CDKAL1	0.5	0.00224549	0.4	0.00225333	0.3	0.00183958	0.3	0.00232872
12	SCN9A	0.3	0.0021707	0.3	0.00175393	0.4	0.00185526	0.5	0.000764782
19	PRPH2	0.3	0.00680041	0.3	0.00602175	0.3	0.00186491	0.3	0.00243427
9	AC102948.2	0.3	0.00203077	0.3	0.0104404	0.3	0.00186853	0.4	0.00185827
11	ZNF180	0.5	0.00583659	0.5	0.00613876	0.3	0.00187456	0.3	0.00269423
1	CLCA2	0.3	0.0128119	0.3	0.00436131	0.5	0.00188723	0.5	0.00134199
10	GAREM	0.5	0.0163819	0.5	0.0107998	0.5	0.00189446	0.5	0.00222076
5	LRCH1	0.5	0.00250062	0.5	0.0028818	0.3	0.00189627	0.3	0.00270689
19	KIF13A	0.3	0.00698135	0.5	0.00323223	0.5	0.00189869	0.5	0.00243307
11	SULT2B1	0.3	0.00261883	0.5	0.0101985	0.4	0.00190411	0.3	0.00180037
11	ICAM3	0.3	0.0191569	0.3	0.0568942	0.3	0.00190954	0.3	0.00241739
18	TNIP1	0.5	0.00249821	0.5	0.0028034	0.5	0.00191859	0.5	0.00139929
20	MACC1	0.3	0.00491258	0.3	0.00352777	0.3	0.00192341	0.5	0.00304164
5	STARD13	0.3	0.0049174	0.3	0.0104681	0.5	0.00192764	0.5	0.00249338
5	ABCC4	0.5	0.00333657	0.5	0.00382089	0.3	0.00197408	0.3	0.00214658
16	TRAT1	0.5	0.00233777	0.5	0.00479255	0.5	0.00198252	0.5	0.00260617
19	SLC35B3	0.3	0.0133746	0.3	0.00903745	0.5	0.00198313	0.5	0.00314357
1	AGMAT	0.3	0.00899222	0.3	0.0061852	0.4	0.00199278	0.5	0.00313754
1	DNAJC16	0.3	0.00899222	0.3	0.0061852	0.4	0.00199278	0.5	0.00313754
17	DDX60L	0.5	0.00539268	0.5	0.00500968	0.3	0.00201147	0.4	0.002535
12	IL1RL2	0.3	0.0129265	0.5	0.00958269	0.3	0.00202354	0.3	0.00193125
16	CLSTN2	0.3	0.00734142	0.3	0.00850368	0.5	0.00203077	0.5	0.00174127
17	TSPAN5	0.5	0.00160315	0.5	0.00262125	0.3	0.00203258	0.5	0.00230279
13	ARFGEF2	0.5	0.00526119	0.5	0.00404828	0.4	0.00206093	0.5	0.00227685
5	CAB39L	0.3	0.00414177	0.3	0.00342342	0.5	0.00208204	0.5	0.00171895
8	SEC14L5	0.3	0.00491318	0.3	0.00521354	0.5	0.00209471	0.5	0.00256335
13	PRNT	0.5	0.00787882	0.5	0.0082009	0.5	0.00210737	0.5	0.00264296
17	PALLD	0.3	0.0119892	0.5	0.00902419	0.3	0.00210798	0.4	0.002535
9	ADAM11	0.3	0.00870754	0.5	0.00374369	0.5	0.0021122	0.4	0.00344996
11	IZUMO1	0.5	0.00442886	0.3	0.00534503	0.5	0.0021134	0.5	0.00107299
20	AOC1	0.5	0.00484201	0.5	0.00562911	0.3	0.0021134	0.3	0.00241678
11	PDE4C	0.3	0.00880524	0.3	0.00871116	0.4	0.00213632	0.3	0.00210074
19	ITPR3	0.3	0.00611041	0.3	0.0165423	0.3	0.00213632	0.5	0.00406094
10	SPIRE1	0.3	0.0294761	0.3	0.0118137	0.3	0.00214115	0.3	0.00200424
6	RP11-463C8.4	0.3	0.00634142	0.3	0.011251	0.3	0.00215924	0.4	0.00320026
11	ZNF677	0.5	0.0439068	0.3	0.00962672	0.4	0.00220267	0.4	0.00217492
21	MSRA	0.4	0.0147239	0.3	0.0113487	0.3	0.00220508	0.3	0.00104343
17	TACC3	0.3	0.00670994	0.3	0.00654528	0.3	0.00220568	0.3	0.0031116
17	TMEM129	0.3	0.00670994	0.3	0.00654528	0.3	0.00220568	0.3	0.0031116
9	ODF4	0.5	0.00512609	0.5	0.00428772	0.3	0.00222378	0.3	0.00299218
11	VAV1	0.5	0.00445841	0.3	0.00698979	0.3	0.00222981	0.3	0.00400244
22	GABBR2	0.5	0.00478049	0.5	0.00619244	0.3	0.00223162	0.4	0.00248735
20	ZNF804B	0.5	0.0053209	0.3	0.00675758	0.3	0.00223343	0.3	0.00313392
16	ACPP	0.3	0.00851333	0.3	0.00693008	0.5	0.00225695	0.5	0.00140471
5	COL4A2	0.3	0.00354224	0.4	0.00372801	0.3	0.00226057	0.3	0.00253138
19	KIF25	0.3	0.00370087	0.3	0.00684866	0.4	0.00226539	0.4	0.0014602
12	ALK	0.3	0.00356335	0.5	0.00419484	0.4	0.00227203	0.4	0.00329496
19	MAN1A1	0.5	0.00298555	0.5	0.0033619	0.3	0.002304	0.5	0.00327143
16	HEG1	0.5	0.00394997	0.5	0.00220327	0.3	0.00231787	0.3	0.00178047
16	OSTN	0.3	0.00918221	0.5	0.00571415	0.5	0.00231968	0.5	0.00233898
3	LDLRAD3	0.4	0.00590474	0.3	0.00669667	0.3	0.0023245	0.4	0.00148192
17	SPARCL1	0.3	0.00459713	0.3	0.00372138	0.3	0.00235044	0.3	0.00288904
6	DAAM1	0.3	0.00523707	0.4	0.00843612	0.3	0.00236069	0.3	0.00377566
9	RHBDL3	0.3	0.00324851	0.5	0.00827147	0.3	0.00237517	0.3	0.00124126
21	SBSPON	0.5	0.00686253	0.5	0.0091804	0.3	0.00239025	0.3	0.00233838
16	PLCH1	0.4	0.00668159	0.3	0.00198192	0.3	0.00240231	0.5	0.00200906
4	PYROXD1	0.5	0.00371534	0.5	0.00515685	0.5	0.00241136	0.4	0.00572682
20	ATP6V0E2	0.3	0.00721054	0.3	0.00819969	0.5	0.00243065	0.5	0.00268759
16	MITF	0.3	0.0185574	0.3	0.00746085	0.5	0.00243307	0.5	0.00257179
1	C1orf222	0.3	0.00707906	0.3	0.0142974	0.3	0.00243488	0.3	0.00266105
9	CACNA1G	0.5	0.00824433	0.5	0.00519967	0.5	0.00244091	0.3	0.00239809
9	ELAC2	0.3	0.0114916	0.3	0.0447048	0.3	0.00244573	0.3	0.00197951
17	STAP1	0.5	0.00601512	0.3	0.00438302	0.4	0.00244815	0.4	0.00229073
1	TAS1R2	0.4	0.00318458	0.3	0.00328892	0.3	0.002459	0.3	0.00206696
19	BAI3	0.3	0.00604588	0.3	0.0117697	0.5	0.00246745	0.5	0.0034186
8	DNAAF1	0.5	0.0133288	0.3	0.0230195	0.5	0.00248011	0.4	0.0014409
1	DIEXF	0.5	0.00729981	0.5	0.00842527	0.3	0.00248494	0.3	0.0031309
20	TBX20	0.3	0.00733901	0.3	0.00579377	0.5	0.00249037	0.5	0.0030917
9	KRTAP3-3	0.3	0.00200182	0.3	0.00341317	0.3	0.00250183	0.3	0.00217794
18	WWC1	0.5	0.00281244	0.3	0.00381004	0.3	0.00252595	0.3	0.00139989
7	MORF4L1	0.3	0.00267372	0.3	0.00532875	0.5	0.00254344	0.5	0.00203379
12	CNGA3	0.4	0.0131394	0.3	0.00463151	0.3	0.00255128	0.4	0.00191195
8	TMEM8A	0.5	0.00491921	0.3	0.0104355	0.5	0.0025537	0.5	0.00427626
2	FAS	0.3	0.00698014	0.3	0.00566409	0.5	0.00260014	0.5	0.00347168
2	ACTA2	0.3	0.00698014	0.3	0.0277264	0.5	0.00260014	0.5	0.00347168
11	PPP1R15A	0.3	0.00486433	0.4	0.00575396	0.3	0.00260195	0.3	0.00208144
13	PAK7	0.3	0.00612911	0.3	0.0120387	0.3	0.00260798	0.3	0.00276721
2	PLCE1	0.5	0.00587821	0.5	0.0111557	0.3	0.0026116	0.5	0.00500124
21	SLC39A14	0.3	0.00386191	0.3	0.00337457	0.5	0.00261401	0.4	0.00360557
11	GEMIN7	0.4	0.0218759	0.3	0.0149567	0.5	0.00262426	0.5	0.00255551
5	RAB20	0.5	0.00452898	0.5	0.00492343	0.3	0.00262909	0.3	0.00332632
17	KIAA0922	0.5	0.0117745	0.3	0.0126117	0.3	0.00263271	0.4	0.00281003
19	WDR27	0.3	0.00604166	0.3	0.00661705	0.3	0.00264236	0.3	0.00341558
4	AC073528.1	0.5	0.00526059	0.5	0.00412608	0.3	0.00266226	0.3	0.00140411
8	CCDC113	0.5	0.0142239	0.3	0.0197528	0.4	0.00267855	0.5	0.00227384
11	EMR2	0.3	0.00207963	0.4	0.0010561	0.3	0.00267975	0.3	0.00126418
10	CPLX4	0.4	0.019128	0.5	0.0158487	0.3	0.00269001	0.3	0.00469183
16	PYDC2	0.3	0.00771477	0.3	0.0195834	0.3	0.00269182	0.3	0.00286069
17	CLOCK	0.3	0.0236202	0.3	0.00579497	0.3	0.00270931	0.5	0.00315925
7	KIAA1199	0.5	0.0059162	0.3	0.00836556	0.5	0.00271594	0.4	0.00172016
1	C1orf100	0.4	0.00830946	0.3	0.010415	0.5	0.00271896	0.5	0.00250183
19	C6orf58	0.3	0.011333	0.3	0.00728835	0.5	0.00271956	0.4	0.00302113
22	SNX30	0.3	0.00432753	0.5	0.00365865	0.3	0.00272077	0.3	0.00464056
21	NRG1	0.4	0.00683056	0.3	0.00598195	0.3	0.00277022	0.3	0.003573
1	SOAT1	0.3	0.0103457	0.3	0.00904168	0.4	0.00277203	0.4	0.00297891
9	GOSR2	0.4	0.00518399	0.3	0.00358326	0.3	0.00277626	0.4	0.00198192
9	RP11-156P1.2	0.4	0.00518399	0.3	0.00358326	0.3	0.00277626	0.4	0.00198192
19	MYLK4	0.5	0.00491318	0.3	0.0051279	0.3	0.0028227	0.3	0.000901092
4	AC004466.1	0.3	0.0432729	0.3	0.013529	0.3	0.00283958	0.3	0.00350304
4	HDAC7	0.3	0.0432729	0.3	0.013529	0.3	0.00283958	0.3	0.00350304
4	SLC48A1	0.3	0.0432729	0.3	0.013529	0.3	0.00283958	0.3	0.00350304
2	LIPK	0.3	0.0336257	0.3	0.0383006	0.3	0.002842	0.3	0.00258747
21	ADHFE1	0.3	0.00915084	0.3	0.0116261	0.5	0.00286793	0.5	0.00219724
21	C8orf46	0.3	0.00915084	0.3	0.0116261	0.5	0.00286793	0.5	0.00219724
7	GATM	0.5	0.0282469	0.3	0.0273983	0.3	0.00290774	0.4	0.00294634
7	BNIP2	0.3	0.00617133	0.3	0.00842406	0.5	0.00291257	0.5	0.00290593
11	CRX	0.5	0.00480401	0.5	0.00757424	0.3	0.00291498	0.5	0.00170025
11	TPRX2P	0.3	0.0200641	0.3	0.0178276	0.3	0.00291498	0.5	0.00170025
16	SLC6A1	0.3	0.00515142	0.5	0.00768944	0.5	0.0029186	0.5	0.00420811
12	IMMT	0.3	0.0086611	0.4	0.0121225	0.5	0.0029192	0.5	0.00331667
12	ABCB11	0.5	0.00273584	0.5	0.00395057	0.3	0.00293609	0.5	0.00246081
3	FAT3	0.5	0.00450184	0.3	0.0048016	0.5	0.0029584	0.5	0.00273886
17	PPA2	0.5	0.0189103	0.3	0.0149163	0.5	0.00295961	0.5	0.00404828
4	P2RX7	0.5	0.00334622	0.5	0.0016906	0.3	0.00297951	0.4	0.00324429
18	NDFIP1	0.3	0.0218204	0.3	0.0156859	0.5	0.00299338	0.4	0.00612067
9	PLXDC1	0.5	0.0061261	0.5	0.0077395	0.3	0.00299459	0.3	0.00267975
11	MYH14	0.3	0.0294767	0.3	0.0330684	0.3	0.00299519	0.3	0.00224368
1	ATP1A4	0.3	0.00659051	0.3	0.00500486	0.3	0.00299761	0.3	0.00175755
18	SH3RF2	0.3	0.0177311	0.3	0.0199187	0.3	0.00299881	0.3	0.00370931
4	ATP6V0A2	0.5	0.00811766	0.5	0.00957606	0.5	0.00300907	0.5	0.00323705
16	CLRN1	0.3	0.00638605	0.3	0.00635408	0.3	0.00300967	0.3	0.00261341
16	RP11-166N6.3	0.3	0.00638605	0.3	0.00635408	0.3	0.00300967	0.3	0.00261341
19	UST	0.3	0.00972684	0.3	0.00426722	0.4	0.00303018	0.3	0.00252052
14	ERG	0.5	0.00974192	0.3	0.0124555	0.5	0.00304103	0.5	0.00402958
20	DPY19L1	0.3	0.00353862	0.5	0.00992528	0.3	0.00304405	0.4	0.00358265
1	CHD1L	0.3	0.0189175	0.3	0.0373682	0.3	0.00305008	0.3	0.00343609
22	TJP2	0.5	0.00323886	0.5	0.00346987	0.5	0.00305068	0.5	0.00219965
5	TPP2	0.3	0.00673768	0.5	0.0042262	0.3	0.00306878	0.3	0.00332934
22	SH3GL2	0.5	0.0117775	0.5	0.00841803	0.3	0.00306938	0.3	0.00248976
1	DISC1	0.4	0.00233777	0.5	0.00250364	0.3	0.00309652	0.3	0.0017093
4	PCED1B	0.5	0.00512428	0.4	0.00876363	0.4	0.00309954	0.5	0.00354285
20	SUGCT	0.5	0.00441197	0.3	0.00922262	0.3	0.00310074	0.3	0.00254224
1	CAPN9	0.5	0.0067799	0.5	0.00728413	0.5	0.00311401	0.5	0.00239869
17	RNF150	0.4	0.00926725	0.3	0.000639329	0.5	0.00312668	0.3	0.000102534
17	SNCA	0.5	0.00946267	0.3	0.0162643	0.3	0.00314598	0.3	0.00246865
17	PET112	0.5	0.00760741	0.5	0.00657724	0.5	0.00315081	0.3	0.00456698
13	C20orf196	0.3	0.0105266	0.3	0.0068951	0.3	0.00317855	0.3	0.00172076
7	WDR93	0.5	0.00624371	0.5	0.00517193	0.5	0.00318156	0.5	0.00301269
11	FCGBP	0.3	0.00595239	0.3	0.0187685	0.3	0.0031882	0.3	0.00117793
12	PARD3B	0.5	0.00889933	0.5	0.0114675	0.4	0.00319544	0.5	0.00233114
21	KB-1980E6.3	0.5	0.00930284	0.5	0.00967437	0.3	0.00319604	0.5	0.00543791
15	PARVB	0.5	0.00373826	0.5	0.00593068	0.3	0.00320267	0.5	0.0028227
12	CTNNA2	0.3	0.00461824	0.3	0.00516891	0.5	0.00320267	0.4	0.00317071
19	SCML4	0.3	0.00845301	0.3	0.00794275	0.3	0.00322258	0.3	0.00318217
9	AC087645.1	0.5	0.00473767	0.5	0.00440051	0.4	0.0032268	0.5	0.00257722
9	BIRC5	0.5	0.00473767	0.5	0.00440051	0.4	0.0032268	0.5	0.00257722
12	STK39	0.3	0.00349339	0.5	0.00158566	0.3	0.00324248	0.3	0.00255611
2	LHPP	0.5	0.0055694	0.5	0.00517917	0.4	0.00324248	0.4	0.00264839
19	TIAM2	0.5	0.00764541	0.3	0.00252836	0.5	0.00327867	0.3	0.00304948
21	DOCK5	0.5	0.000957787	0.4	0.00215381	0.5	0.00328712	0.5	0.0037268
1	C4BPA	0.5	0.00488725	0.3	0.00491499	0.3	0.00330219	0.5	0.00143909
11	LYPD5	0.5	0.00417554	0.4	0.00295237	0.5	0.00331546	0.5	0.00300484
5	FGF14	0.3	0.00139808	0.3	0.000589268	0.3	0.00331606	0.5	0.00215623
6	TC2N	0.5	0.00670511	0.4	0.0102045	0.5	0.00332873	0.5	0.00317252
20	WBSCR17	0.4	0.00412065	0.3	0.00263452	0.5	0.00335286	0.5	0.00243669
18	GRIA1	0.5	0.00148976	0.5	0.00217251	0.5	0.00335708	0.5	0.00334441
4	KRT8	0.5	0.00597953	0.4	0.0105085	0.5	0.00336251	0.5	0.00312427
12	CYP27A1	0.5	0.00471776	0.5	0.0127226	0.5	0.00336432	0.5	0.00408628
1	ZNF697	0.3	0.063691	0.3	0.0346776	0.3	0.00340895	0.5	0.00286733
1	LRRC8B	0.3	0.0541204	0.3	0.0291793	0.3	0.00344815	0.3	0.00576542
19	PTCHD4	0.5	0.00518339	0.3	0.00552296	0.5	0.00345298	0.5	0.0039747
12	PDIA6	0.3	0.0117486	0.3	0.0121231	0.3	0.00346504	0.3	0.00199519
17	MYOZ2	0.3	0.00460498	0.3	0.0206244	0.3	0.00346625	0.3	0.00231546
1	HHAT	0.3	0.00285708	0.3	0.00371715	0.5	0.00348917	0.5	0.00241618
3	OR51Q1	0.3	0.00969126	0.3	0.00881188	0.5	0.00349821	0.5	0.00348675
4	TMTC1	0.5	0.00493248	0.4	0.00386311	0.5	0.00351872	0.3	0.00143246
2	TACC2	0.3	0.00831549	0.5	0.00922141	0.3	0.00351932	0.3	0.00392403
13	HNF4A	0.3	0.050124	0.5	0.0620951	0.3	0.00352415	0.3	0.00286431
12	PLA2R1	0.5	0.00351993	0.5	0.0049168	0.3	0.00353078	0.4	0.0025169
1	MCOLN2	0.3	0.00824071	0.3	0.00784625	0.5	0.00353139	0.5	0.00271051
2	NEBL	0.5	0.00894879	0.5	0.0134434	0.5	0.00353561	0.5	0.0026128
16	TP63	0.5	0.0128819	0.3	0.00872201	0.5	0.00354586	0.3	0.00312366
20	DENND2A	0.3	0.00815144	0.3	0.002228	0.5	0.0035525	0.5	0.00354707
19	LYRM4	0.5	0.0036104	0.5	0.00242462	0.5	0.00357783	0.3	0.0040151
2	ZCCHC24	0.3	0.00638967	0.3	0.00529919	0.5	0.00358808	0.5	0.00415926
21	MATN2	0.5	0.00511342	0.5	0.00804046	0.3	0.00359773	0.4	0.00379978
7	PCSK6	0.5	0.00455612	0.5	0.00247107	0.3	0.00360799	0.3	0.00299278
13	C20orf166	0.3	0.00223464	0.4	0.00699824	0.4	0.0036104	0.4	0.00338784
12	SLC16A14	0.5	0.00428109	0.5	0.004149	0.4	0.00362125	0.4	0.00395298
16	ITPR1	0.5	0.017286	0.5	0.0130188	0.4	0.00363211	0.5	0.00274308
14	KRTAP12-2	0.3	0.0163348	0.3	0.0162709	0.3	0.00363875	0.3	0.00464177
4	RERG	0.3	0.0056074	0.3	0.0053782	0.5	0.00364538	0.4	0.00388121
20	SFRP4	0.3	0.0121129	0.3	0.00657785	0.3	0.0036496	0.3	0.00347891
18	PDE8B	0.5	0.00788003	0.5	0.00857183	0.5	0.00365021	0.3	0.0059729
18	THBS4	0.5	0.00705071	0.3	0.00855494	0.5	0.00365865	0.5	0.0045127
18	COL23A1	0.5	0.00685348	0.5	0.00772562	0.5	0.00371715	0.5	0.00327746
4	BRI3BP	0.3	0.0141853	0.3	0.00487337	0.3	0.00376058	0.3	0.00322439
12	REG3G	0.3	0.0139669	0.3	0.0343169	0.3	0.00379496	0.3	0.00346625
1	GALNT2	0.3	0.00525094	0.5	0.00799764	0.5	0.00381969	0.5	0.00444454
3	LRRC4C	0.5	0.00477928	0.3	0.00298132	0.4	0.00382994	0.5	0.00355551
18	SERINC5	0.3	0.00846447	0.3	0.00343066	0.3	0.00384683	0.3	0.00184199
8	ADAMTS18	0.5	0.0128348	0.5	0.011567	0.3	0.0038601	0.3	0.00323102
21	TOP1MT	0.3	0.0216461	0.5	0.0460763	0.5	0.00387457	0.5	0.00391378
22	C9orf78	0.3	0.0120785	0.3	0.00446445	0.3	0.00393489	0.3	0.00277806
2	PARD3	0.3	0.00695421	0.4	0.00686796	0.3	0.00393911	0.3	0.0020748
10	SKA1	0.3	0.00468942	0.3	0.00390413	0.3	0.00394635	0.3	0.00233536
3	ME3	0.5	0.00438242	0.5	0.00270931	0.3	0.00398073	0.3	0.00376902
17	EVC	0.5	0.01783	0.4	0.0146038	0.3	0.00398736	0.4	0.00504527
13	NOP56	0.4	0.0204199	0.5	0.0193126	0.5	0.00401209	0.4	0.00525215
7	THSD4	0.3	0.00969488	0.5	0.00749523	0.3	0.00403079	0.3	0.0028619
9	CCDC40	0.5	0.00600607	0.5	0.00615806	0.3	0.00404225	0.3	0.00371233
3	PRSS23	0.5	0.00221895	0.5	0.00458266	0.5	0.00412488	0.3	0.00257903
13	DEFB127	0.4	0.117468	0.5	0.132228	0.4	0.00412789	0.3	0.00559533
12	SLC8A1	0.5	0.0191081	0.3	0.0111503	0.3	0.00419786	0.5	0.00340231
12	EIF2AK2	0.3	0.00608569	0.3	0.00556759	0.5	0.00420268	0.5	0.00381969
19	SYNJ2	0.3	0.0107057	0.3	0.0168174	0.5	0.0042069	0.5	0.00329375
4	OAS2	0.3	0.0139434	0.5	0.0157088	0.5	0.00421113	0.5	0.00479014
7	MEGF11	0.5	0.00590535	0.3	0.00298313	0.4	0.00427506	0.3	0.00404647
9	USP22	0.3	0.00823588	0.3	0.0109536	0.3	0.00427807	0.3	0.0055115
14	PFKL	0.3	0.00756519	0.5	0.0055507	0.3	0.00429858	0.3	0.00481547
8	WDR59	0.5	0.00684564	0.5	0.00834384	0.3	0.00430823	0.5	0.00275032
4	SLCO1B1	0.5	0.0287065	0.5	0.0166406	0.3	0.00431185	0.3	0.00658207
20	PLXNA4	0.5	0.0065501	0.5	0.00493188	0.3	0.00432331	0.3	0.00426842
17	GPR78	0.3	0.0107075	0.5	0.0173722	0.3	0.00433537	0.5	0.00481849
12	CCDC148	0.5	0.00843492	0.3	0.00751995	0.3	0.00433779	0.3	0.00288844
19	EFHC1	0.3	0.0548924	0.3	0.0236093	0.3	0.00438543	0.3	0.00539147
19	TRAM2	0.3	0.0548924	0.3	0.0236093	0.3	0.00438543	0.3	0.00539147
6	CPSF2	0.5	0.00385407	0.5	0.00476903	0.3	0.00439508	0.3	0.00352415
6	NDUFB1	0.5	0.00385407	0.5	0.00476903	0.3	0.00439508	0.3	0.00352415
18	SLIT3	0.5	0.00888124	0.5	0.00931369	0.3	0.00440956	0.3	0.00441559
1	NAV1	0.5	0.0216696	0.3	0.032762	0.5	0.00449701	0.5	0.00520028
2	AVPI1	0.3	0.00581246	0.4	0.00522742	0.4	0.00449762	0.3	0.00331968
20	ELMO1	0.3	0.00985712	0.5	0.00924976	0.5	0.00451812	0.3	0.00217613
1	ALDH9A1	0.5	0.00781067	0.5	0.00712128	0.5	0.00451933	0.5	0.00378651
19	LRFN2	0.3	0.0099868	0.5	0.00550788	0.5	0.00452838	0.5	0.00498737
3	SMCO4	0.5	0.0385654	0.3	0.0370364	0.3	0.00453561	0.3	0.00491017
17	TMEM165	0.3	0.029689	0.3	0.00579497	0.3	0.00454708	0.3	0.00324731
5	ATP8A2	0.5	0.00889572	0.3	0.00394333	0.5	0.00455914	0.5	0.00392222
22	PAX5	0.5	0.00536131	0.3	0.0039373	0.5	0.00456276	0.3	0.00541379
11	ZNF626	0.4	0.00713515	0.3	0.00823347	0.5	0.00460377	0.3	0.00589208
1	ROR1	0.3	0.00760922	0.3	0.00257661	0.5	0.00463393	0.3	0.00376782
19	FAM50B	0.5	0.0137606	0.4	0.00707484	0.5	0.00467675	0.3	0.00617736
18	KIAA0947	0.5	0.00403561	0.5	0.00552115	0.5	0.00468218	0.5	0.00308929
7	CRTC3	0.5	0.0063384	0.5	0.00838667	0.3	0.0047057	0.3	0.00379617
4	C12orf60	0.5	0.0112594	0.5	0.00714782	0.5	0.00471837	0.5	0.00436734
12	ANKRD44	0.3	0.00920452	0.3	0.0191847	0.5	0.00479074	0.3	0.00363633
17	SORBS2	0.5	0.00516831	0.5	0.00540353	0.5	0.00479195	0.3	0.00463332
17	MAML3	0.4	0.00559352	0.3	0.00230219	0.3	0.0048583	0.3	0.00313452
1	CEP104	0.3	0.00665626	0.5	0.008988	0.3	0.00489448	0.3	0.00427807
22	OLFM1	0.3	0.00529014	0.3	0.00353983	0.3	0.00497772	0.3	0.00226359
12	CCDC173	0.5	0.0106997	0.5	0.00717013	0.5	0.00502657	0.5	0.00607242
8	NME4	0.5	0.0522929	0.5	0.050095	0.5	0.00504647	0.4	0.00507904
16	CMTM7	0.5	0.0071068	0.5	0.00560076	0.5	0.00511403	0.5	0.00436915
16	ERC2	0.5	0.00891924	0.5	0.0081617	0.5	0.00511463	0.3	0.00436432
6	STON2	0.3	0.0310388	0.3	0.0105176	0.3	0.00515082	0.3	0.0053396
13	SLC9A8	0.3	0.0315376	0.5	0.083863	0.3	0.00516469	0.3	0.0051864
12	CD207	0.3	0.0217643	0.3	0.0101695	0.3	0.00519063	0.3	0.00658147
3	OR52E4	0.4	0.0201087	0.3	0.00390111	0.4	0.00530462	0.4	0.00567314
1	IL12RB2	0.3	0.00712671	0.3	0.0121979	0.5	0.00530643	0.5	0.00438061
13	PROKR2	0.3	0.00857726	0.3	0.00845904	0.5	0.00541922	0.5	0.00351269
12	SLC19A3	0.3	0.00840054	0.3	0.00743853	0.3	0.00555975	0.3	0.00316347
5	GTF3A	0.3	0.0101744	0.4	0.025739	0.4	0.00558448	0.3	0.00206636
20	AVL9	0.3	0.0107811	0.3	0.00941019	0.5	0.00568279	0.5	0.00544153
11	ZNF709	0.3	0.00724975	0.3	0.0107588	0.5	0.0057039	0.5	0.00236552
19	RIMS1	0.3	0.0140206	0.3	0.0174669	0.3	0.00571174	0.3	0.00563152
9	FAM211A	0.5	0.0298018	0.4	0.0490275	0.3	0.00574732	0.3	0.00639449
5	ITGBL1	0.3	0.0222655	0.3	0.00908631	0.3	0.00588966	0.3	0.000498797
12	OSBPL6	0.5	0.0170067	0.5	0.0139144	0.5	0.00595782	0.5	0.00657845
17	ACSL1	0.5	0.00552657	0.3	0.0054542	0.5	0.00601934	0.3	0.00565142
14	C21orf49	0.5	0.0310056	0.5	0.0250219	0.5	0.00622561	0.5	0.00733057
12	SULT6B1	0.3	0.0271853	0.3	0.024853	0.3	0.00634383	0.3	0.00734504
15	TNRC6B	0.5	0.041072	0.3	0.0237963	0.4	0.00639268	0.5	0.00663756
20	HIP1	0.3	0.00379617	0.3	0.0168029	0.5	0.00698437	0.4	0.00305008
3	WT1	0.3	0.0100574	0.3	0.00489388	0.3	0.00736072	0.5	0.00669848
16	PXK	0.3	0.00458266	0.3	0.00809836	0.5	0.00763817	0.4	0.00844336
9	RCVRN	0.5	0.0264682	0.5	0.0270177	0.5	0.00824613	0.5	0.00906279
1	TARBP1	0.3	0.00981732	0.3	0.0127558	0.3	0.00840597	0.3	0.00446022

## Sheet: Shared_significant
Chr	Acronym	tf.LWK	p.LWK	tf.YRI	p.YRI	tf.GBR	p.GBR	tf.TSI	p.TSI
19	HLA-DPA1	0.5	1.21e-06	0.3	6.03e-07	0.3	3.62e-05	0.3	2.47e-05
19	HLA-DQA1	0.4	1.21e-06	0.4	3.02e-06	0.3	1.93e-05	0.3	7.84e-06
2	MYO3A	0.3	9.05e-06	0.3	1.09e-05	0.5	6.03e-07	0.5	6.03e-07
17	CPE	0.3	1.09e-05	0.3	7.24e-06	0.3	4.83e-06	0.3	4.83e-06
19	HLA-DPB1	0.5	1.33e-05	0.5	3.08e-05	0.4	6.82e-05	0.3	5.37e-05
19	HLA-DRB5	0.5	1.87e-05	0.4	1.93e-05	0.4	1.09e-05	0.4	1.69e-05
6	EGLN3	0.3	2.35e-05	0.3	2.47e-05	0.5	3.62e-05	0.3	2.65e-05
21	PREX2	0.5	2.41e-05	0.5	2.65e-05	0.3	8.02e-05	0.3	5.67e-05
17	UGT2B4	0.5	2.47e-05	0.4	6.94e-05	0.3	6.39e-05	0.3	4.64e-05
19	RP11-257K9.8	0.5	2.96e-05	0.5	9.05e-06	0.4	0.000109168	0.5	5.67e-05
21	MYOM2	0.4	3.02e-05	0.5	2.96e-05	0.3	0.000534985	0.3	0.000513876
19	HLA-DQB2	0.5	3.08e-05	0.3	2.53e-05	0.5	0.000140532	0.3	0.000158626
19	PACRG	0.5	3.2e-05	0.5	2.35e-05	0.4	0.000286492	0.4	0.000442102
19	HLA-C	0.3	3.32e-05	0.3	4.1e-05	0.3	5.97e-05	0.3	8.75e-05
3	SNX19	0.5	4.7e-05	0.5	3.92e-05	0.5	4.28e-05	0.5	4.4e-05
12	SH3RF3	0.5	5.67e-05	0.3	7.96e-05	0.3	0.000151991	0.3	6.27e-05
19	HLA-B	0.3	6.33e-05	0.3	5.43e-05	0.3	5.13e-05	0.3	4.4e-05
13	SIRPA	0.5	7.06e-05	0.5	8.02e-05	0.3	0.000135707	0.3	0.000118216
4	PTPRB	0.5	7.12e-05	0.5	0.000141135	0.3	0.00143789	0.3	0.000600125
16	FRMD4B	0.3	7.18e-05	0.5	6.76e-05	0.3	0.000285285	0.3	0.00201147
16	EPHA6	0.5	8.2e-05	0.3	0.000153801	0.3	0.00572199	0.3	0.000469846
3	PTS	0.5	8.44e-05	0.5	6.27e-05	0.3	0.000208687	0.3	0.00102353
17	YIPF7	0.4	8.44e-05	0.3	0.000180339	0.3	0.000109772	0.5	3.98e-05
19	HLA-DQB1	0.3	8.56e-05	0.3	7.78e-05	0.3	4.58e-05	0.3	6.03e-05
3	PDGFD	0.5	9.41e-05	0.5	7e-05	0.5	3.2e-05	0.5	1.87e-05
11	ZNF441	0.5	9.47e-05	0.5	0.000109168	0.5	0.00285647	0.5	0.00204465
2	DMBT1	0.5	9.65e-05	0.5	0.000100724	0.5	0.000175514	0.3	0.000464418
12	SPAG16	0.3	9.71e-05	0.3	8.2e-05	0.5	1.21e-05	0.3	1.33e-05
4	TMEM132D	0.3	0.000110375	0.5	0.000489147	0.3	0.000715324	0.5	0.0011713
17	TMPRSS11E	0.4	0.000117009	0.4	6.63e-05	0.3	0.000101931	0.4	0.000159832
16	SUCLG2	0.4	0.000119422	0.3	0.000133294	0.5	3.02e-05	0.4	0.000120025
17	IGFBP7	0.3	0.000122437	0.3	5.85e-05	0.3	0.000247288	0.3	0.000558508
16	CPNE4	0.3	0.000124247	0.3	0.000488544	0.5	0.000116406	0.5	0.000101931
6	OR6J1	0.3	0.000125453	0.3	0.000124247	0.3	0.000414961	0.3	0.000247288
11	ZNF83	0.5	0.000126659	0.5	5.19e-05	0.4	7.3e-05	0.5	6.76e-05
1	PPAP2B	0.3	0.000126659	0.3	0.0001345	0.5	3.86e-05	0.5	6.57e-05
3	OR5P2	0.5	0.000127263	0.3	0.000366106	0.4	0.000483719	0.3	0.000564539
6	STXBP6	0.5	0.000129675	0.5	0.000156816	0.3	0.00164959	0.3	0.000109772
18	STK32A	0.5	0.0001345	0.5	0.000112184	0.5	0.000117612	0.4	0.000146563
9	WSCD1	0.3	0.0001345	0.5	0.000146563	0.3	0.00020929	0.3	0.000123041
1	FMN2	0.3	0.000138722	0.3	0.000184561	0.3	0.000194211	0.3	2.17e-05
4	MYRFL	0.5	0.000140532	0.4	0.00025935	0.3	0.000380582	0.5	0.000198433
19	HLA-DRB1	0.3	0.000154404	0.3	9.47e-05	0.3	4.76e-05	0.3	9.05e-05
17	FRAS1	0.4	0.00015742	0.3	0.000461402	0.3	0.000368519	0.3	0.000261763
2	RRP12	0.5	0.000161038	0.5	0.000279857	0.3	0.000323886	0.3	0.000483115
19	HLA-G	0.5	0.000161642	0.4	0.000144754	0.5	0.000209893	0.4	0.000144151
16	MYRIP	0.4	0.000162245	0.5	0.000135707	0.3	0.00024005	0.3	0.000225574
2	ANK3	0.5	0.000162848	0.3	0.000381185	0.3	0.000740053	0.3	0.000457783
19	CDSN	0.3	0.000163451	0.3	0.00015561	0.4	8.02e-05	0.4	6.33e-05
19	PSORS1C1	0.3	0.000163451	0.3	0.00015561	0.4	8.02e-05	0.4	6.33e-05
19	SLC17A5	0.5	0.000164657	0.4	0.000115803	0.5	0.00460739	0.3	0.00352596
17	GPRIN3	0.5	0.000170086	0.5	0.000143547	0.5	0.000201449	0.4	0.00028046
12	COL4A4	0.3	0.000170689	0.3	0.000537398	0.5	0.0019976	0.3	0.00211159
21	CNBD1	0.5	0.000171292	0.5	0.000299761	0.3	0.00028227	0.3	0.000183355
10	CCDC102B	0.4	0.000173704	0.4	0.00017672	0.3	0.000190592	0.3	0.00014596
6	SLC24A4	0.5	0.000174308	0.5	0.000237637	0.3	0.000994578	0.3	0.000589871
17	MANBA	0.5	0.000177323	0.3	0.000344393	0.5	0.000236431	0.5	0.000234018
20	HUS1	0.3	0.000177926	0.3	0.000194211	0.4	5.85e-05	0.5	4.7e-05
21	IDO2	0.5	0.000177926	0.5	0.000349821	0.4	0.000158626	0.5	7.96e-05
4	CHST11	0.3	0.000179133	0.4	0.000246684	0.3	0.000200243	0.3	0.000129675
1	ERO1LB	0.5	0.00018637	0.5	0.000233415	0.4	0.000232812	0.4	0.000142341
1	GPR137B	0.5	0.00018637	0.5	0.000233415	0.4	0.000232812	0.4	0.000142341
16	CLDN11	0.3	0.00018637	0.3	0.000250906	0.3	0.0026502	0.3	0.002266
8	RBFOX1	0.3	0.000189386	0.4	0.000351631	0.5	0.000361884	0.4	0.000313633
1	LGALS8	0.4	0.000189386	0.5	0.000367312	0.3	0.000534382	0.5	0.000285285
20	RAMP3	0.5	0.00019783	0.3	0.00081243	0.3	0.000473465	0.3	0.000588062
2	PDSS1	0.3	0.000199639	0.3	0.000277445	0.3	0.000388422	0.4	0.000467434
18	NR3C1	0.3	0.000203861	0.3	0.000183958	0.3	0.000584443	0.3	0.000215321
12	LRP1B	0.5	0.000205671	0.5	0.000215321	0.5	0.000285285	0.5	0.000278048
11	CTD-3105H18.18	0.4	0.000208687	0.5	0.000180339	0.3	0.000429436	0.4	0.000197227
19	PDE10A	0.5	0.00020929	0.5	0.000140532	0.3	0.00164235	0.3	0.00167432
1	EDARADD	0.5	0.000209893	0.5	0.000222559	0.4	0.000121231	0.4	0.000148976
6	ATXN3	0.5	0.000211702	0.5	0.000419786	0.3	0.000537398	0.3	0.00040712
4	C12orf55	0.5	0.000216527	0.5	0.000258144	0.3	0.000149579	0.3	0.000120025
12	SNTG2	0.5	0.00021894	0.5	0.0001345	0.5	0.000225574	0.4	0.000288301
20	PKD1L1	0.3	0.00021894	0.5	0.000535589	0.3	0.000984928	0.3	0.000813636
12	THSD7B	0.3	0.000221352	0.3	0.000152594	0.5	7.72e-05	0.5	0.000100724
16	ULK4	0.5	0.000226178	0.3	0.000623647	0.5	0.000214115	0.5	0.000174308
19	AIM1	0.5	0.000227987	0.5	0.00011339	0.3	0.00131907	0.4	0.000345599
19	PHACTR2	0.5	0.000232812	0.5	0.000123041	0.3	0.000191799	0.3	5.25e-05
13	SMOX	0.5	0.000234018	0.3	0.000329315	0.4	0.000498797	0.5	0.000212305
2	APBB1IP	0.5	0.000234622	0.5	0.000138722	0.4	8.5e-05	0.4	6.57e-05
18	SLC27A6	0.3	0.000234622	0.3	0.000210496	0.3	0.000227384	0.4	4.46e-05
11	CEACAM7	0.3	0.000236431	0.3	0.0010169	0.5	0.00134983	0.5	0.00179072
3	HBE1	0.5	0.000242462	0.4	0.000236431	0.5	0.000179133	0.4	0.000519907
3	HBG2	0.5	0.000242462	0.4	0.000236431	0.5	0.000179133	0.4	0.000519907
9	RPAIN	0.3	0.000242462	0.3	0.00274791	0.3	0.000165864	0.3	0.000214718
1	C1orf68	0.5	0.000243066	0.5	0.000370328	0.4	0.000439086	0.5	0.000396263
1	SMYD3	0.4	0.000243669	0.3	0.000387216	0.3	0.000602537	0.3	0.000977087
11	ZNF773	0.4	0.000246684	0.3	0.000279857	0.3	0.000565142	0.3	0.000723768
20	DPP6	0.3	0.000247891	0.3	0.000319664	0.4	0.000742466	0.5	0.000539207
17	CCSER1	0.5	0.0002497	0.5	0.000377566	0.3	0.00062425	0.3	0.000527145
16	ZNF385D	0.3	0.000250303	0.3	0.000274429	0.5	0.00017853	0.5	0.000159229
21	STAU2	0.3	0.000252113	0.3	0.000209893	0.3	0.000515685	0.3	0.000246684
19	PARK2	0.5	0.000256335	0.5	0.000311824	0.5	0.000244875	0.5	0.000357662
5	SGCG	0.3	0.000259953	0.3	0.00032268	0.5	8.32e-05	0.4	9.53e-05
17	TEC	0.3	0.000260557	0.3	0.000383597	0.3	0.000161038	0.4	0.000119422
2	HPSE2	0.5	0.000264175	0.5	0.000372741	0.5	0.000314236	0.4	0.000401088
18	SPEF2	0.5	0.000266588	0.4	0.000137516	0.3	0.000336552	0.5	0.000299761
1	PADI2	0.4	0.000266588	0.5	0.000225574	0.5	0.000267794	0.4	0.000341377
4	TMEM132C	0.5	0.000267794	0.3	0.000639932	0.3	0.00015561	0.5	0.000158023
4	BICD1	0.3	0.000272016	0.4	0.000176117	0.3	0.000186973	0.3	0.000163451
20	ORC5	0.3	0.000272619	0.3	0.000579618	0.3	0.000194814	0.3	0.000164054
16	VPS8	0.5	0.000275032	0.5	0.000638726	0.5	0.000186973	0.5	0.000211099
6	NUBPL	0.3	0.000281667	0.4	0.000469243	0.3	0.00218277	0.3	0.00137395
10	NEDD4L	0.3	0.000287698	0.5	0.000336552	0.3	0.000589871	0.5	0.00105429
20	RELN	0.3	0.000288301	0.3	0.000421595	0.3	0.00154826	0.3	0.00112425
17	SLC2A9	0.3	0.000289507	0.3	0.000268397	0.5	0.000101931	0.5	6.88e-05
17	GRID2	0.3	0.00029192	0.3	0.00066647	0.3	0.0015935	0.5	0.000717134
18	SPINK5	0.3	0.000293729	0.3	0.000369122	0.4	0.0017286	0.5	0.000787098
16	ALDH1L1	0.3	0.000294332	0.3	0.000296745	0.4	0.000357662	0.4	0.000358265
9	CEP112	0.3	0.000297348	0.3	0.000239447	0.5	8.5e-05	0.4	8.81e-05
17	COL25A1	0.5	0.000302776	0.5	0.000302173	0.3	0.000252113	0.3	0.000477687
12	IL18R1	0.3	0.00030338	0.3	0.0016321	0.5	0.000162245	0.4	0.000191195
12	IL1RL1	0.3	0.00030338	0.3	0.0016321	0.5	0.000162245	0.4	0.000191195
1	SLC35F3	0.3	0.000305792	0.3	0.000477084	0.3	0.000758751	0.3	0.00020748
16	WWTR1	0.3	0.000306998	0.3	0.000278651	0.3	0.000507241	0.3	0.00105791
3	TRIM5	0.5	0.000310014	0.5	0.000395057	0.3	0.000278048	0.5	0.000111581
3	SYT9	0.5	0.000310617	0.5	0.000722562	0.3	0.000838968	0.3	0.000402898
17	RXFP1	0.3	0.00031122	0.5	0.000752116	0.3	0.000673708	0.3	0.000480703
20	TYW1	0.3	0.00031303	0.4	0.000500606	0.3	0.000959596	0.3	0.000863697
4	OVCH1	0.3	0.000313633	0.3	0.000320268	0.3	0.000256335	0.3	0.000124247
4	OVCH1-AS1	0.3	0.000313633	0.3	0.000320268	0.3	0.000256335	0.3	0.000124247
16	SLC9C1	0.3	0.000316046	0.3	0.000170689	0.3	0.000264779	0.3	0.000642344
13	SPTLC3	0.4	0.000316046	0.5	0.000452355	0.3	0.000271413	0.3	0.000262366
9	SDK2	0.4	0.000321474	0.4	0.000549461	0.3	0.000622441	0.3	0.000358868
17	SCD5	0.3	0.000323283	0.4	0.000720753	0.3	0.00126358	0.3	0.00109832
22	POLR1E	0.3	0.000333537	0.3	0.000560317	0.3	0.000150182	0.3	0.000193005
22	TEK	0.5	0.000334743	0.5	0.000483115	0.5	0.000344996	0.5	0.000346806
2	CTNNA3	0.5	0.000335346	0.5	0.000323283	0.4	0.000173704	0.3	0.00023824
5	COG6	0.5	0.000337155	0.5	0.000545239	0.4	0.000643551	0.5	0.000671295
1	TNN	0.3	0.000338362	0.3	0.000199036	0.5	7.96e-05	0.5	8.2e-05
12	RFX8	0.3	0.000340774	0.4	0.000451752	0.3	0.00213451	0.5	0.00132088
20	ABCA13	0.5	0.000341981	0.4	0.000201449	0.3	0.000244875	0.3	0.000250303
17	ANK2	0.4	0.000342584	0.3	0.00037455	0.3	7.96e-05	0.4	6.76e-05
18	FAT2	0.5	0.000342584	0.5	0.000598918	0.5	0.000528351	0.5	0.000324489
12	PPP1R1C	0.5	0.000344393	0.5	0.000369122	0.3	0.00080097	0.3	0.00304405
12	C2orf83	0.3	0.000344393	0.5	0.000416167	0.3	0.000807605	0.3	0.000674914
17	STPG2	0.3	0.00035525	0.5	0.000339568	0.5	0.000336552	0.5	0.000164657
16	GADL1	0.3	0.000356456	0.3	0.000731006	0.3	0.0012865	0.3	0.00125212
16	KALRN	0.3	0.000357059	0.3	0.00109711	0.3	0.000206877	0.5	0.00012485
22	FXN	0.5	0.000361281	0.4	0.00038601	0.5	0.000274429	0.5	0.000320871
4	DHX37	0.5	0.000363694	0.5	0.000162245	0.5	0.00266769	0.5	0.00164778
6	CEP128	0.4	0.000367916	0.5	0.000504828	0.5	0.000877569	0.5	0.00108324
21	CSMD1	0.3	0.000368519	0.3	0.000460799	0.4	6.03e-06	0.4	4.22e-06
17	ART3	0.3	0.000369725	0.3	0.000202052	0.5	0.000189386	0.5	0.00017672
17	CXCL11	0.3	0.000369725	0.3	0.000202052	0.5	0.000189386	0.5	0.00017672
5	KL	0.5	0.000370931	0.5	0.000268397	0.3	6.03e-05	0.3	0.000168276
18	MSH3	0.3	0.000378169	0.4	0.000350425	0.3	0.000450546	0.3	0.000234622
19	LRRC16A	0.5	0.000379978	0.5	0.000592887	0.4	0.000766591	0.5	0.000709293
5	KLHL1	0.3	0.000381185	0.4	0.000480703	0.3	0.00340955	0.3	0.00150725
8	WWOX	0.5	0.000382391	0.4	0.000502416	0.3	0.000338965	0.3	0.000884807
17	RASSF6	0.3	0.0003842	0.3	0.000516891	0.3	0.00021894	0.5	9.65e-05
1	SPRR3	0.4	0.000393851	0.5	0.000360678	0.5	0.000367312	0.5	0.000141738
1	RYR2	0.3	0.00039566	0.4	0.000319061	0.3	0.000490353	0.5	0.000191195
2	CPXM2	0.5	0.000396263	0.3	0.000895663	0.3	0.00171714	0.3	0.000603743
19	C6ORF165	0.5	0.000396866	0.3	0.00067793	0.3	0.00141195	0.3	0.000884204
19	C6orf165	0.5	0.000396866	0.3	0.00067793	0.3	0.00141195	0.3	0.000884204
21	SGCZ	0.5	0.000400485	0.5	0.00018818	0.3	0.000396866	0.3	0.00019783
18	GRAMD3	0.3	0.000400485	0.3	0.00109229	0.3	0.00116044	0.5	0.00124488
4	LRRK2	0.5	0.000403501	0.5	0.000575396	0.5	0.000542223	0.5	0.000512066
4	DNM1L	0.3	0.000404104	0.3	0.00122076	0.3	0.000818461	0.3	0.00155188
16	FHIT	0.5	0.000404707	0.5	0.000462609	0.4	0.000449943	0.4	0.000396866
13	PLCB4	0.5	0.000410739	0.5	9.17e-05	0.5	9.65e-05	0.5	0.000110375
22	PALM2	0.3	0.000410739	0.3	0.00199217	0.3	0.00072015	0.3	0.000854047
1	RNPEP	0.4	0.00041677	0.5	0.000451149	0.4	0.000410135	0.5	0.000388422
10	LDLRAD4	0.4	0.000417976	0.4	0.000403501	0.5	0.00010374	0.5	8.93e-05
4	PRR4	0.3	0.000417976	0.3	0.000425214	0.3	0.00033233	0.5	0.000292523
4	TAS2R14	0.3	0.000417976	0.3	0.000425214	0.3	0.00033233	0.5	0.000292523
11	PLA2G4C	0.3	0.000419786	0.4	0.00105972	0.3	0.00131545	0.4	0.00228771
6	PSMC1	0.5	0.000423404	0.5	0.000376963	0.5	0.000390835	0.5	0.000435467
15	FAM19A5	0.4	0.000423404	0.3	0.000463815	0.3	0.000314236	0.3	0.000184561
16	SLC15A2	0.5	0.00042642	0.5	0.00025151	0.5	0.000206274	0.4	0.000431848
3	SLC1A2	0.5	0.000427023	0.3	0.000940296	0.3	0.000588665	0.3	0.00150423
1	CASQ2	0.3	0.000427626	0.3	0.000367916	0.3	0.00319061	0.3	0.00501029
19	MCM9	0.5	0.000429436	0.5	0.000580221	0.5	0.000449943	0.3	0.000556699
5	PARP4	0.5	0.000434864	0.5	0.00110013	0.5	0.000397469	0.5	0.000795542
19	HLA-DRA	0.3	0.000440896	0.3	0.00200966	0.3	0.000342584	0.3	0.000317252
7	FAM189A1	0.3	0.000445118	0.3	0.000373947	0.4	0.00058384	0.4	0.000509654
17	ARHGAP24	0.5	0.000446324	0.5	0.000509654	0.4	0.000778654	0.3	0.000751513
17	LGI2	0.5	0.000450546	0.5	0.000298554	0.5	0.000764782	0.5	0.000605553
17	KIAA1211	0.3	0.000458387	0.3	0.000503019	0.3	0.000145357	0.3	0.00012485
9	ARHGAP44	0.4	0.000460799	0.3	0.000867919	0.3	0.000424008	0.3	0.00258144
2	PTCHD3	0.4	0.000469243	0.5	0.000378169	0.3	0.000371534	0.5	0.00030157
19	ZC3H12D	0.5	0.000471656	0.5	0.000636916	0.5	0.000174911	0.3	0.000244875
17	RP11-215A19.2	0.3	0.000471656	0.3	0.00196503	0.4	0.0007298	0.5	0.000366709
1	SPRR1B	0.5	0.000472862	0.5	0.000598315	0.5	0.000413754	0.5	0.000248494
19	DNAH8	0.5	0.000481909	0.4	0.000882394	0.5	0.000642948	0.4	0.00100423
8	TLDC1	0.3	0.000484322	0.3	0.000586252	0.5	0.0010555	0.5	0.000986134
3	MMP26	0.5	0.00048975	0.5	0.000284682	0.3	0.000554286	0.3	0.000439086
6	GNG2	0.3	0.000491559	0.3	0.000155007	0.3	0.00600909	0.5	0.00430763
22	BSPRY	0.5	0.000493369	0.3	0.0012859	0.3	0.000387216	0.3	0.000896267
16	KNG1	0.5	0.000497591	0.5	0.000457783	0.5	0.000365503	0.3	0.000525938
3	DYNC2H1	0.3	0.000497591	0.5	0.000513876	0.5	0.0012672	0.3	0.00129253
2	PDLIM1	0.3	0.000505432	0.3	0.00105067	0.4	0.000296745	0.4	0.000334743
1	AL160286.1	0.3	0.000507241	0.3	0.000185164	0.4	0.000682755	0.5	0.000772623
1	AXDND1	0.3	0.000507241	0.3	0.000185164	0.4	0.000682755	0.5	0.000772623
4	ANO2	0.3	0.000512669	0.3	0.000416167	0.3	0.000636313	0.3	0.000890838
19	TAB2	0.4	0.000513272	0.3	0.0014783	0.5	0.000893854	0.3	0.000631488
22	LINGO2	0.5	0.000514479	0.4	0.000550064	0.3	0.00130278	0.3	0.00116346
22	PTPRD	0.3	0.000515082	0.3	0.00182148	0.5	0.0015181	0.4	0.00237095
19	COL21A1	0.5	0.000515082	0.5	0.0018444	0.3	0.00141014	0.3	0.00171051
16	ADCY5	0.4	0.000515685	0.4	0.000483115	0.3	0.000477084	0.5	0.000187577
15	RAB36	0.5	0.000516288	0.5	0.000697833	0.5	0.000534382	0.5	0.000514479
19	MUC22	0.3	0.000518701	0.3	0.00164899	0.3	0.000552477	0.3	0.000459593
19	SAMD5	0.5	0.00052051	0.3	0.000484925	0.5	0.000668279	0.5	0.000412548
12	TNS1	0.5	0.000521716	0.3	0.000402898	0.4	0.000221956	0.5	0.000302776
11	ZNF331	0.5	0.00052232	0.5	0.0003842	0.3	0.00104343	0.3	0.000694214
13	PLCB1	0.5	0.000525938	0.3	0.000918583	0.5	0.000621838	0.5	0.000395057
7	LINC00923	0.5	0.000541017	0.5	0.000845603	0.5	0.000495178	0.5	0.000477084
18	SLC38A9	0.5	0.000544636	0.5	0.000474671	0.4	0.000354647	0.5	0.00022859
12	NMS	0.3	0.000546445	0.3	0.000675517	0.3	0.00122015	0.3	0.00216286
11	ZNF568	0.5	0.000548858	0.3	0.000835952	0.5	0.00103921	0.5	0.00051086
1	CNR2	0.3	0.000550064	0.3	0.000910742	0.5	7.3e-05	0.5	0.000121231
9	RBFOX3	0.5	0.00055308	0.5	0.000790717	0.5	0.00122739	0.5	0.00121171
3	TCP11L1	0.4	0.000555492	0.5	0.000621838	0.5	0.000319664	0.4	0.000317855
20	CNTNAP2	0.3	0.000557905	0.3	0.000975278	0.5	0.000711102	0.3	0.00060314
9	KRTAP3-2	0.3	0.00056092	0.4	0.000831127	0.3	0.00139325	0.3	0.00267251
2	ACBD5	0.3	0.000563333	0.3	0.00248976	0.3	0.00234984	0.4	0.00234501
2	PRKG1	0.5	0.000565142	0.3	0.000686374	0.3	0.000487337	0.3	0.000361281
6	RNASE11	0.5	0.000569364	0.5	0.00128529	0.3	0.000752116	0.3	0.000712912
1	OR6N1	0.3	0.000569364	0.3	0.00142281	0.3	0.00275334	0.3	0.00214416
17	CCNG2	0.5	0.00057238	0.3	0.00042642	0.3	0.000652598	0.3	0.00242945
9	RP11-192H23.4	0.5	0.00057419	0.5	0.000951152	0.5	0.000411342	0.5	0.000559111
21	DEPTOR	0.4	0.000580221	0.5	0.000719546	0.3	0.000876363	0.3	0.000769004
21	SNX31	0.4	0.000580824	0.5	0.000327505	0.3	0.00022859	0.5	0.000109168
21	CSMD3	0.3	0.000580824	0.3	0.00114959	0.5	0.000400485	0.5	0.000366106
1	CLCNKB	0.4	0.000588665	0.3	0.00099096	0.5	0.000963215	0.5	0.000900488
12	MYO1B	0.3	0.000595903	0.5	0.000648979	0.4	0.000640535	0.5	0.000330521
10	KLHL14	0.5	0.00060495	0.4	0.00132631	0.4	0.00053016	0.3	0.000575396
19	PKHD1	0.5	0.0006146	0.5	0.000458387	0.4	0.000861284	0.5	0.00118457
19	RNF144B	0.5	0.000615203	0.5	0.000443308	0.3	0.000583237	0.3	0.000758751
21	MTSS1	0.3	0.000621838	0.3	0.00280943	0.3	0.000313633	0.5	0.000359472
6	CCDC85C	0.3	0.000622441	0.3	0.00103378	0.5	0.000431245	0.5	0.00121714
9	NUP88	0.5	0.000630282	0.5	0.00208385	0.5	0.000866109	0.4	0.000863697
3	DEPDC7	0.4	0.000631488	0.5	0.00037455	0.5	0.000452355	0.5	0.000417976
20	MAGI2	0.3	0.000632091	0.5	0.000725578	0.3	0.000682152	0.3	0.000454165
18	ARL15	0.3	0.000638726	0.4	0.00105067	0.3	0.000934264	0.3	0.000541017
19	TBC1D7	0.4	0.000641138	0.5	0.000769004	0.3	0.000709896	0.3	0.00127323
12	INPP5D	0.3	0.000641741	0.5	0.000806399	0.5	0.00115803	0.5	0.000726784
16	ROBO2	0.5	0.000642948	0.5	0.00112486	0.4	0.000419786	0.3	0.000259953
4	GRIP1	0.3	0.000642948	0.4	0.00297288	0.3	0.000160435	0.4	0.000267794
18	PRELID2	0.5	0.000644154	0.5	0.000444514	0.3	0.00096985	0.3	0.000524732
20	KIAA1324L	0.4	0.000644154	0.5	0.000816049	0.3	0.000601934	0.3	0.00168155
5	RCBTB1	0.5	0.000648376	0.5	0.000682755	0.5	0.00163753	0.5	0.00207721
14	TIAM1	0.5	0.000656217	0.5	0.00121412	0.3	0.000319061	0.3	0.0010941
18	DAB2	0.5	0.00065682	0.5	0.000642344	0.3	0.000472259	0.3	0.000960199
22	SYK	0.3	0.000678533	0.3	0.0013052	0.5	0.00266347	0.5	0.0022093
3	DLG2	0.4	0.000681549	0.5	0.000567555	0.5	0.000886616	0.3	0.000727387
2	PCDH15	0.5	0.000688786	0.3	0.000484322	0.5	0.00119241	0.5	0.000815446
18	KCNIP1	0.5	0.000692405	0.5	0.00071834	0.4	0.00107902	0.3	0.00122256
4	PDZRN4	0.3	0.000694818	0.3	0.000719546	0.5	0.000316046	0.5	0.000405913
5	CPB2	0.5	0.000700849	0.5	0.000659835	0.3	0.000664661	0.3	0.000860078
4	TSPAN8	0.5	0.000708087	0.3	0.00200363	0.5	0.000782876	0.5	0.000902901
20	SEMA3A	0.5	0.000709293	0.5	0.000777448	0.5	0.00100604	0.5	0.000703865
17	40787	0.4	0.000711102	0.3	0.00100544	0.5	0.000196021	0.3	0.000369122
3	TRPC6	0.5	0.000723768	0.5	0.000774432	0.3	0.000620631	0.3	0.000796145
12	PDE1A	0.4	0.000724372	0.4	0.00118095	0.3	0.00103197	0.3	0.000828112
12	NCKAP5	0.5	0.000725578	0.3	0.00194995	0.5	0.000530763	0.4	0.000972262
16	OSBPL10	0.3	0.000728593	0.3	0.0010187	0.5	0.00141798	0.3	0.00175031
17	ADAM29	0.5	0.000732815	0.5	0.000551873	0.3	0.000525938	0.3	0.000817255
4	CCDC91	0.3	0.000734022	0.3	0.00128047	0.3	0.000364297	0.5	0.000224971
18	IQGAP2	0.3	0.000734625	0.3	0.000686977	0.4	0.000366709	0.3	0.000302776
5	MYO16	0.5	0.000734625	0.5	0.00129253	0.5	0.00116105	0.5	0.000910139
17	FAM114A1	0.3	0.000738847	0.3	0.00103861	0.3	0.000486734	0.3	0.00031122
19	GPR111	0.5	0.000743672	0.5	0.000825096	0.5	0.00100905	0.3	0.00152172
19	GPR115	0.5	0.000743672	0.5	0.000825096	0.5	0.00100905	0.3	0.00152172
3	SLC5A12	0.3	0.000756338	0.3	0.000726181	0.3	0.00089506	0.3	0.000478893
5	CCDC169	0.3	0.000757544	0.3	0.000211702	0.5	0.000109772	0.5	7.84e-05
5	CCDC169-SOHLH2	0.3	0.000757544	0.3	0.000211702	0.5	0.000109772	0.5	7.84e-05
5	SOHLH2	0.3	0.000757544	0.3	0.000211702	0.5	0.000109772	0.5	7.84e-05
19	C6orf10	0.3	0.000759957	0.3	0.00156455	0.3	0.00077021	0.3	0.00111702
1	NMNAT2	0.3	0.000761163	0.3	0.000693611	0.5	0.000474068	0.5	0.000590474
12	AGAP1	0.3	0.000768401	0.3	0.000621838	0.3	0.00365081	0.3	0.00477627
1	PGBD5	0.3	0.00077021	0.3	0.000563333	0.3	0.000261763	0.3	0.000338362
6	OR11H6	0.5	0.00077021	0.5	0.00093728	0.5	0.000791923	0.5	0.000837159
12	LTBP1	0.5	0.000771416	0.4	0.000869728	0.5	0.00173765	0.5	0.00100544
6	RGS6	0.3	0.000778051	0.5	0.00186732	0.4	0.00178409	0.3	0.00127021
17	KLHL5	0.5	0.000781067	0.5	0.00106213	0.5	0.000485528	0.5	0.000254525
1	REG4	0.3	0.000782876	0.3	0.000465021	0.5	0.000330521	0.4	0.000221956
21	PXDNL	0.5	0.000785289	0.3	0.000744275	0.3	0.0031876	0.3	0.00166286
5	PHF11	0.4	0.000790717	0.3	0.000922202	0.5	0.00210677	0.5	0.00260255
4	TMCC3	0.5	0.000800367	0.4	0.000613394	0.5	0.00107178	0.5	0.00033414
1	HEATR1	0.3	0.00080097	0.3	0.000551873	0.3	0.00149639	0.5	0.00114597
4	TMTC2	0.3	0.000807002	0.3	0.00321534	0.3	0.0023052	0.4	0.0032268
4	KRT83	0.5	0.000808208	0.5	0.000632694	0.5	0.000352234	0.5	0.000278651
4	AC121757.1	0.5	0.000808208	0.5	0.00070688	0.5	0.000352234	0.5	0.000278651
16	RBMS3	0.5	0.000816652	0.5	0.00225333	0.3	0.00183294	0.3	0.00110676
12	GNLY	0.5	0.000817858	0.5	0.000854047	0.3	0.000465624	0.5	0.000267191
12	GALNT13	0.5	0.000820874	0.5	0.000890838	0.3	0.00108264	0.3	0.000927027
18	CTD-2260A17.2	0.5	0.000822683	0.5	0.000905917	0.3	0.000726784	0.5	0.000638122
18	ERAP2	0.5	0.000822683	0.5	0.000905917	0.5	0.000811827	0.5	0.000638122
13	CDH4	0.3	0.000826302	0.3	0.000434864	0.5	0.00196684	0.3	0.00115139
3	TENM4	0.5	0.000832937	0.5	0.000970453	0.4	0.000840778	0.5	0.000458387
14	RCAN1	0.5	0.00083354	0.5	0.00059349	0.3	0.00120568	0.3	0.00107178
4	ERC1	0.5	0.000834143	0.4	0.00153017	0.5	0.000995785	0.5	0.000778654
1	RP13-279N23.2	0.3	0.000838365	0.3	0.00139627	0.3	0.002459	0.3	0.00206696
8	ZNF423	0.5	0.000840778	0.4	0.00177564	0.3	0.000955977	0.5	0.0013245
22	TRPM3	0.5	0.000844396	0.5	0.000773829	0.5	0.000358265	0.3	0.000264779
16	MOBP	0.5	0.000845603	0.5	0.000613997	0.3	0.000586252	0.3	0.000226781
11	CTD-3105H18.16	0.5	0.000848618	0.5	0.00062606	0.3	0.00182691	0.3	0.000605553
12	KLHL23	0.3	0.000850428	0.4	0.000679739	0.3	0.000316649	0.3	0.000546445
7	GABRG3	0.3	0.000851031	0.3	0.0024005	0.5	0.00176841	0.5	0.00208083
1	WDR64	0.3	0.00085284	0.4	0.00110254	0.3	0.00296142	0.3	0.00178952
16	CADM2	0.3	0.00085465	0.3	0.00396082	0.3	0.000642344	0.5	0.000440896
1	SNX7	0.3	0.000860078	0.3	0.00125936	0.3	0.001883	0.3	0.00129193
8	HAGH	0.5	0.000863697	0.5	0.000716531	0.3	0.0021321	0.3	0.00172619
4	CACNA1C	0.3	0.000863697	0.3	0.00125272	0.5	0.000432452	0.4	0.000762972
10	DCC	0.3	0.000865506	0.4	0.000854047	0.5	0.000606156	0.5	0.000819668
4	NAV3	0.3	0.000867316	0.4	0.000630282	0.4	0.000235225	0.3	0.00030157
15	L3MBTL2	0.5	0.000877569	0.4	0.000954771	0.3	0.000984325	0.5	0.000568761
18	ADAMTS16	0.5	0.000880585	0.5	0.000934264	0.3	0.0011918	0.5	0.00104645
16	SUMF1	0.3	0.000884204	0.4	0.000770813	0.3	0.00128891	0.3	0.0016701
13	JPH2	0.5	0.000890235	0.5	0.00104042	0.3	0.00151991	0.3	0.00152534
1	RGL1	0.3	0.000892648	0.3	0.000472862	0.5	0.00393549	0.5	0.00183837
2	CUBN	0.3	0.000893251	0.3	0.000836556	0.3	0.000808208	0.5	0.000884204
12	LRRTM4	0.3	0.000898679	0.3	0.000966834	0.4	0.000731006	0.4	0.000638726
21	LOXL2	0.5	0.000899885	0.4	0.00143668	0.3	0.00316709	0.3	0.00131847
7	POLR2M	0.3	0.000901695	0.3	0.0014204	0.5	0.00194332	0.5	0.00271896
20	NXPH1	0.5	0.000909536	0.5	0.000648376	0.3	0.000773226	0.3	0.00115079
17	KCNIP4	0.5	0.000910742	0.5	0.000941502	0.3	0.000907123	0.3	0.0017292
16	LSAMP	0.5	0.000913758	0.5	0.000603743	0.3	0.00130339	0.3	0.00108022
4	ANKS1B	0.3	0.000913758	0.3	0.000605553	0.5	0.000924011	0.3	0.00171352
19	TMEM244	0.5	0.000919789	0.4	0.00134078	0.3	0.00209048	0.3	0.00249037
12	PDE11A	0.3	0.000920392	0.3	0.000959596	0.3	0.00173765	0.5	0.0020175
22	CCDC171	0.3	0.000924614	0.5	0.000456577	0.5	0.0010567	0.5	0.00217673
14	HLCS	0.5	0.000930042	0.4	0.00108565	0.3	0.000902298	0.3	0.0010368
12	LBH	0.3	0.000932455	0.3	0.00334863	0.3	0.000211702	0.3	0.000607362
17	C4orf19	0.3	0.000933661	0.5	0.000701452	0.5	0.000354647	0.5	0.000241256
3	SWAP70	0.4	0.000935471	0.5	0.000420389	0.5	0.000402295	0.3	0.00157118
22	OR1N2	0.5	0.000940899	0.4	0.00116527	0.5	0.000829921	0.5	0.00070688
12	PRKCE	0.3	0.000940899	0.3	0.00172197	0.5	0.000419786	0.5	0.000457783
2	LDB3	0.3	0.000943915	0.5	0.00114476	0.5	0.00187637	0.3	0.00177203
1	LAMC2	0.4	0.000944518	0.3	0.000366709	0.5	0.000171895	0.5	0.000200846
9	SLC39A11	0.5	0.00094693	0.5	0.00119844	0.5	0.00056273	0.4	0.00133354
4	CLEC1B	0.5	0.000948137	0.5	0.00248192	0.5	0.00127443	0.5	0.00137395
3	OR51F1	0.5	0.000952359	0.5	0.000284682	0.3	0.000554286	0.3	0.000439086
3	TSPAN18	0.5	0.000955374	0.5	0.000988547	0.4	0.000829318	0.5	0.00107359
11	EMR1	0.5	0.00096804	0.5	0.000914964	0.3	0.0010368	0.3	0.000788304
8	CTD-3088G3.8	0.5	0.000968643	0.3	0.00121895	0.3	0.00145297	0.5	0.00124368
13	TMC2	0.3	0.000968643	0.3	0.00127986	0.3	0.00467434	0.3	0.00310376
19	TAP2	0.3	0.00096985	0.3	0.000297951	0.3	0.00124368	0.3	0.00244453
3	OR52E2	0.5	0.000975278	0.4	0.00190532	0.4	0.00131545	0.5	0.00102293
16	NKIRAS1	0.5	0.000980706	0.4	0.00106575	0.3	0.000482512	0.4	0.000612791
4	CPNE8	0.3	0.000982516	0.5	0.000510257	0.5	0.000703865	0.4	0.000930042
9	KRT40	0.3	0.000984325	0.3	0.00327143	0.4	0.000783479	0.4	0.000723165
17	SHROOM3	0.3	0.000984928	0.3	0.000659232	0.5	0.0011146	0.5	0.000660439
20	GRB10	0.5	0.000987944	0.5	0.0019982	0.5	0.000588062	0.5	0.000738244
8	SCNN1G	0.3	0.000995785	0.5	0.00203077	0.3	0.000995182	0.3	0.00111159
17	C4orf50	0.3	0.000996991	0.3	0.00176117	0.5	0.00117673	0.3	0.00106756
21	WDYHV1	0.3	0.00100423	0.3	0.000754529	0.3	0.000227987	0.3	0.000203258
20	THSD7A	0.3	0.00100724	0.3	0.00112486	0.3	0.000920995	0.3	0.000889029
12	INPP1	0.3	0.00102051	0.3	0.00201087	0.3	0.00102896	0.3	0.00135465
3	NAV2	0.5	0.00102775	0.5	0.00139868	0.3	0.00100905	0.3	0.00194272
12	SP140L	0.3	0.00102775	0.3	0.00492524	0.3	0.00041677	0.3	0.000360075
12	PID1	0.3	0.00102896	0.3	0.000409532	0.5	0.00375093	0.5	0.00306214
15	LARGE	0.3	0.00103258	0.3	0.00152293	0.3	0.00243186	0.3	0.0022093
12	BARD1	0.3	0.00103378	0.4	0.00104645	0.5	0.00183113	0.3	0.00116527
3	ANO3	0.5	0.00103619	0.3	0.00149337	0.5	0.0014982	0.5	0.00127263
20	PCLO	0.5	0.00104042	0.5	0.00181606	0.5	0.00144452	0.5	0.00133053
17	RASGEF1B	0.3	0.00104524	0.5	0.000625457	0.4	0.000453562	0.5	0.00033233
5	FAM155A	0.5	0.00105127	0.3	0.00128951	0.5	0.00147226	0.3	0.00186973
4	KSR2	0.5	0.0010555	0.4	0.000497591	0.4	0.000440292	0.5	0.000233415
17	INPP4B	0.3	0.0010573	0.3	0.00118819	0.4	0.000919789	0.3	0.00148312
13	RASSF2	0.3	0.00106092	0.3	0.00100604	0.5	0.00172739	0.4	0.00135888
12	COL4A3	0.3	0.00106575	0.3	0.000392041	0.3	0.000193608	0.3	0.000215924
17	TMEM156	0.3	0.00106756	0.4	0.00194694	0.4	0.00043788	0.4	0.000658629
2	PALD1	0.5	0.00107178	0.5	0.00120327	0.5	0.000525938	0.3	0.000220146
11	ZNF283	0.3	0.00107238	0.5	0.00125514	0.5	0.00096804	0.3	0.00107902
20	TMEM106B	0.3	0.00107299	0.3	0.00121834	0.5	0.000863094	0.5	0.00173282
20	CCDC129	0.5	0.00107962	0.5	0.00133897	0.5	0.000959596	0.3	0.00135103
2	PDE6C	0.5	0.00108324	0.5	0.000872141	0.5	0.00241799	0.3	0.00324188
13	MACROD2	0.4	0.00108505	0.5	0.00125272	0.3	0.00065501	0.3	0.00083173
1	COL24A1	0.5	0.00109048	0.3	0.000971659	0.5	0.000688183	0.5	0.000922202
18	PCDHA1	0.4	0.00109168	0.4	0.000838365	0.5	0.00115079	0.5	0.000598315
18	PCDHA10	0.4	0.00109168	0.4	0.000838365	0.5	0.00115079	0.5	0.000598315
18	PCDHA11	0.4	0.00109168	0.4	0.000838365	0.5	0.00115079	0.5	0.000598315
18	PCDHA12	0.4	0.00109168	0.4	0.000838365	0.5	0.00115079	0.5	0.000598315
18	PCDHA13	0.4	0.00109168	0.4	0.000838365	0.5	0.00115079	0.5	0.000598315
18	PCDHA2	0.4	0.00109168	0.4	0.000838365	0.5	0.00115079	0.5	0.000598315
18	PCDHA3	0.4	0.00109168	0.4	0.000838365	0.5	0.00115079	0.5	0.000598315
18	PCDHA4	0.4	0.00109168	0.4	0.000838365	0.5	0.00115079	0.5	0.000598315
18	PCDHA5	0.4	0.00109168	0.4	0.000838365	0.5	0.00115079	0.5	0.000598315
18	PCDHA6	0.4	0.00109168	0.4	0.000838365	0.5	0.00115079	0.5	0.000598315
18	PCDHA7	0.4	0.00109168	0.4	0.000838365	0.5	0.00115079	0.5	0.000598315
18	PCDHA8	0.4	0.00109168	0.4	0.000838365	0.5	0.00115079	0.5	0.000598315
18	PCDHA9	0.4	0.00109168	0.4	0.000838365	0.5	0.00115079	0.5	0.000598315
18	PCDHAC1	0.4	0.00109168	0.4	0.000838365	0.5	0.00115079	0.5	0.000598315
3	OR51B6	0.3	0.00109892	0.3	0.00144633	0.3	0.000982516	0.3	0.00133535
17	ZFYVE28	0.5	0.00110676	0.5	0.00147287	0.3	0.00102715	0.3	0.000945724
18	ADAMTS12	0.5	0.00111762	0.5	0.000937883	0.5	0.000624853	0.5	0.00057238
3	SBF2	0.4	0.00112305	0.4	0.0015561	0.5	0.000834143	0.5	0.00062425
7	RP11-210M15.2	0.3	0.00113692	0.3	0.00036309	0.5	0.000786495	0.5	0.00105972
11	ZNF155	0.5	0.00114717	0.5	0.00219905	0.3	0.00147468	0.3	0.00151207
12	KCNS3	0.5	0.0011532	0.5	0.00115924	0.5	0.00113571	0.5	0.0011532
22	KANK1	0.3	0.00115562	0.3	0.00130821	0.3	0.001614	0.3	0.000652598
18	CDH18	0.3	0.00116466	0.3	0.000751513	0.5	0.00012485	0.5	0.000215924
7	RP11-321F6.1	0.3	0.0011707	0.5	0.000771416	0.3	0.00351088	0.3	0.00128831
19	C6orf15	0.3	0.00118276	0.3	0.000637519	0.3	0.000317252	0.3	0.000211099
21	NCALD	0.3	0.00118336	0.3	0.00115079	0.3	0.00129434	0.3	0.00245659
18	HSD17B4	0.5	0.00118939	0.5	0.000924614	0.5	0.000992166	0.5	0.00145839
11	MUC16	0.3	0.00119422	0.3	0.00235044	0.4	0.000675517	0.3	0.000610378
20	ATP6V0A4	0.4	0.00121955	0.3	0.00130097	0.4	0.00230581	0.5	0.000898076
21	RP11-383H13.1	0.5	0.00123222	0.5	0.000592284	0.5	0.000387216	0.5	0.000317855
21	TRPA1	0.5	0.00123222	0.5	0.000592284	0.5	0.000387216	0.5	0.000317855
2	PFKP	0.3	0.00123644	0.3	0.00273826	0.3	0.00198373	0.3	0.00197227
3	TRIM22	0.5	0.00123764	0.5	0.00160556	0.5	0.0018052	0.5	0.00188904
3	ALG8	0.4	0.00124187	0.3	0.00343488	0.3	0.00145598	0.3	0.00158928
7	FMN1	0.3	0.00125272	0.3	0.00135224	0.5	0.000680945	0.4	0.000709896
4	RERGL	0.3	0.00125333	0.4	0.000908329	0.4	0.0011906	0.4	0.0011134
6	MDGA2	0.5	0.00125694	0.5	0.000980103	0.3	0.00209591	0.3	0.00461945
4	KRT6A	0.5	0.00128047	0.5	0.00123161	0.4	0.00147649	0.3	0.000964421
1	TMEM51	0.4	0.00128228	0.3	0.00158928	0.5	0.000813636	0.5	0.000920392
19	EYS	0.5	0.00128348	0.5	0.00134018	0.5	0.000989753	0.3	0.000742466
11	PNPLA6	0.5	0.00129675	0.3	0.00363211	0.5	0.0016508	0.3	0.00236914
22	DMRT1	0.4	0.00129856	0.3	0.00148554	0.5	0.00262125	0.3	0.0021315
16	PLSCR1	0.3	0.00129916	0.5	0.00065501	0.3	0.00237034	0.3	0.00072015
8	LITAF	0.5	0.00130097	0.4	0.00388905	0.3	0.000631488	0.4	0.0011339
2	PANK1	0.3	0.00134621	0.3	0.000822683	0.3	0.000747291	0.5	0.000455371
1	SLC30A10	0.3	0.00135103	0.3	0.000854047	0.3	0.000378772	0.3	0.00022859
1	CSMD2	0.3	0.00135405	0.3	0.00116165	0.3	0.00102534	0.3	0.00099096
2	FANK1	0.5	0.00135767	0.5	0.00132389	0.5	0.000765385	0.4	0.000752719
17	WDR17	0.3	0.00135827	0.3	0.00265201	0.4	0.00111702	0.5	0.000617616
10	SLC14A2	0.5	0.00136611	0.5	0.00186009	0.3	0.000680945	0.3	0.000408929
11	ZNF28	0.4	0.00136732	0.3	0.00150303	0.3	0.0024777	0.3	0.00140894
11	ZNF468	0.4	0.00136732	0.3	0.00150303	0.3	0.0024777	0.3	0.00140894
4	GLIPR1L2	0.4	0.00137154	0.3	0.00165984	0.5	0.00156153	0.3	0.00183596
2	ADARB2	0.3	0.00137395	0.5	0.00137395	0.5	0.00102051	0.5	0.000918583
17	SMR3B	0.3	0.00137999	0.3	0.0017672	0.3	0.000570571	0.3	0.000410135
19	DAAM2	0.5	0.00138481	0.5	0.001921	0.5	0.000648979	0.4	0.00135405
10	PTPRM	0.3	0.00139325	0.3	0.00222257	0.3	0.00123101	0.4	0.000674914
4	NTN4	0.3	0.00139506	0.3	0.00033414	0.4	0.000118216	0.4	8.62e-05
12	EIF4E2	0.5	0.00139808	0.5	0.00166286	0.3	0.00156334	0.3	0.000963215
10	DOK6	0.3	0.00139868	0.3	0.00171955	0.3	0.000292523	0.3	0.000239447
17	FABP2	0.3	0.00140954	0.3	0.00212969	0.4	0.00109048	0.3	0.0015748
11	ZNF738	0.3	0.00141135	0.3	0.00471415	0.5	0.00109229	0.5	0.00189084
10	DLGAP1	0.3	0.00141859	0.4	0.00175514	0.3	0.000611584	0.4	0.00153982
19	SSR1	0.4	0.00142643	0.3	0.00183898	0.3	0.000743069	0.5	0.00115562
21	ADRA1A	0.4	0.00142763	0.5	0.000695421	0.3	0.00133294	0.3	0.00243005
3	OPCML	0.3	0.00144331	0.5	0.00343307	0.3	0.000218337	0.3	0.00102051
3	SLC22A9	0.5	0.00144512	0.5	0.00188843	0.3	0.00122136	0.3	0.001114
19	F13A1	0.3	0.00144573	0.3	0.00206998	0.4	0.000722562	0.3	0.000915567
8	CNTNAP4	0.5	0.00144935	0.5	0.00100182	0.4	0.000821477	0.4	0.000449943
18	ITGA1	0.3	0.00144935	0.3	0.00136249	0.3	0.000121834	0.3	0.000189386
19	BLOC1S5-TXNDC5	0.3	0.00145357	0.3	0.00194332	0.3	0.00162003	0.3	0.000753925
5	C13orf45	0.5	0.00145598	0.4	0.00168819	0.3	0.000535589	0.3	0.000469243
16	GRM7	0.5	0.00145719	0.5	0.00253741	0.3	0.00141376	0.5	0.00122015
17	FIP1L1	0.5	0.00146623	0.5	0.00150182	0.5	0.00119542	0.4	0.00168216
17	LNX1	0.5	0.00146623	0.5	0.00150182	0.5	0.00119542	0.4	0.00168216
17	AMTN	0.3	0.00148071	0.3	0.00110978	0.5	0.000662248	0.4	0.000831127
9	NTN1	0.3	0.00148493	0.3	0.00234984	0.3	0.00129856	0.5	0.00109349
16	CADPS	0.5	0.0014976	0.5	0.00138059	0.5	0.00080278	0.3	0.00129736
12	CERS6	0.5	0.00150966	0.5	0.00168638	0.3	0.00423646	0.3	0.00546144
12	SPATA3	0.3	0.00151147	0.5	0.0011333	0.3	0.00155851	0.3	0.00161219
8	MMP2	0.5	0.0015169	0.5	0.00165381	0.4	0.000848015	0.3	0.000841381
12	CNTNAP5	0.5	0.00152474	0.5	0.000841381	0.3	0.000288301	0.3	0.000341981
4	RIMBP2	0.4	0.00152594	0.3	0.00106092	0.3	0.00137335	0.5	0.00145477
2	SVIL	0.5	0.00152594	0.5	0.00142643	0.3	0.00110375	0.3	0.00131967
5	GPC5	0.5	0.00154102	0.5	0.0017672	0.3	0.000656217	0.4	0.000951152
17	GALNTL6	0.3	0.0015561	0.3	0.00279133	0.5	0.0038607	0.5	0.00374068
2	NRG3	0.3	0.00156213	0.3	0.00344453	0.3	0.00314417	0.3	0.00125574
1	LAMC1	0.5	0.00156515	0.3	0.00193246	0.5	0.00151871	0.5	0.00146985
6	TRIM9	0.5	0.00156756	0.5	0.00195357	0.3	0.00314658	0.3	0.0009795
16	CD96	0.3	0.00157178	0.3	0.00155429	0.5	0.000936677	0.5	0.000875157
10	MYO5B	0.5	0.00157842	0.5	0.00147408	0.3	0.00187637	0.5	0.00162064
2	DOCK1	0.5	0.00158264	0.5	0.00314839	0.3	0.00113089	0.5	0.00196202
19	GSTA4	0.4	0.00158505	0.5	0.00250786	0.5	0.00146262	0.5	0.00182993
19	RPS6KA2	0.5	0.00160797	0.3	0.00182269	0.3	0.00235466	0.4	0.00238361
22	ASTN2	0.3	0.00161521	0.3	0.00211763	0.3	0.000915567	0.3	0.00196443
5	CRYL1	0.5	0.00162426	0.5	0.000911345	0.3	0.00465926	0.3	0.00450124
3	APIP	0.4	0.00163029	0.5	0.000977087	0.3	0.00183898	0.3	0.00202173
21	CPQ	0.3	0.00163451	0.4	0.00255912	0.3	0.00221775	0.3	0.00164537
8	FTO	0.4	0.00163511	0.5	0.00132751	0.5	0.00106454	0.5	0.000943915
4	STYK1	0.5	0.0016526	0.5	0.00246986	0.5	0.0015374	0.3	0.00246926
3	CNTN5	0.4	0.00165924	0.3	0.000820874	0.4	0.000451752	0.3	0.000287095
7	OCA2	0.4	0.00167854	0.3	0.00186672	0.5	0.00357602	0.5	0.00444575
1	NSUN4	0.3	0.00168578	0.3	0.000305792	0.3	4.1e-05	0.3	0.000154404
7	C15orf41	0.3	0.00169121	0.5	0.000902298	0.4	0.000345599	0.4	0.000361281
15	PLA2G6	0.3	0.00170448	0.3	0.00135164	0.5	0.00416046	0.5	0.00426903
1	SLC25A24	0.3	0.00170809	0.4	0.00157962	0.5	0.000627266	0.5	0.00031122
16	TMEM44	0.5	0.0017087	0.5	0.00138179	0.5	0.00180218	0.3	0.00291377
14	NCAM2	0.5	0.00171232	0.3	0.00120206	0.5	0.000897473	0.5	0.00102232
16	PARP15	0.5	0.00172197	0.5	0.00135345	0.3	0.00148433	0.3	0.00158686
19	LAMA2	0.3	0.001728	0.4	0.000432452	0.5	0.000436674	0.5	0.000284682
21	GRHL2	0.3	0.0017292	0.5	0.00183174	0.4	0.00137456	0.5	0.000971659
12	ESPNL	0.3	0.00173825	0.3	0.00518882	0.4	0.00573828	0.4	0.00442283
12	SCLY	0.3	0.00173825	0.3	0.00518882	0.4	0.00573828	0.4	0.00442283
12	UBE2F-SCLY	0.3	0.00173825	0.3	0.00518882	0.4	0.00573828	0.4	0.00442283
12	PLEK	0.3	0.00173885	0.3	0.00126117	0.3	0.000416167	0.4	0.000876966
19	CLIC5	0.3	0.00174187	0.3	0.00266648	0.3	0.00356757	0.3	0.00306335
19	FAM65B	0.5	0.00175031	0.5	0.00201871	0.3	0.00253259	0.4	0.002728
13	EYA2	0.5	0.00175635	0.4	0.00177082	0.3	0.00226539	0.3	0.00309652
2	ARHGAP22	0.5	0.00176057	0.5	0.00185827	0.4	0.00344815	0.3	0.00316588
7	UNC13C	0.5	0.00176358	0.5	0.0021502	0.4	0.00427566	0.3	0.0024578
19	POU5F1	0.3	0.00176479	0.3	0.00170266	0.3	0.001997	0.3	0.00143909
20	GALNTL5	0.5	0.00176841	0.3	0.00192884	0.3	0.00242402	0.3	0.00240171
22	PCSK5	0.5	0.00177263	0.5	0.00256395	0.4	0.00303862	0.4	0.00332692
4	GALNT8	0.3	0.00178288	0.5	0.00269001	0.5	0.0023239	0.3	0.00254043
4	KCNA6	0.3	0.00178288	0.5	0.00269001	0.5	0.0023239	0.3	0.00254043
7	AGBL1	0.3	0.00178952	0.3	0.000511463	0.3	0.00375998	0.4	0.00303862
2	HSPA12A	0.5	0.00179856	0.4	0.00448495	0.5	0.00148855	0.5	0.00217553
16	KLHL24	0.5	0.00180641	0.5	0.00212848	0.3	0.00169784	0.3	0.00148554
6	RP11-187E13.1	0.5	0.00181907	0.3	0.00164416	0.3	0.00152655	0.3	0.00337638
3	PDHX	0.4	0.00182752	0.5	0.00169844	0.3	0.00244151	0.3	0.00149941
1	PLEKHA6	0.5	0.00186612	0.5	0.00305068	0.5	0.00179555	0.5	0.00250605
18	GALNT10	0.3	0.00189205	0.3	0.00205671	0.3	0.000981912	0.5	0.0007491
3	TMEM135	0.3	0.00189265	0.3	0.0012105	0.4	0.000702055	0.5	0.000651995
15	XKR3	0.4	0.0019005	0.5	0.00121955	0.4	0.00057419	0.5	0.000369725
12	MYO3B	0.3	0.00192583	0.4	0.00186491	0.5	0.00286733	0.5	0.00231003
11	CACNA1A	0.5	0.00192703	0.5	0.00170689	0.3	0.0018812	0.3	0.00183234
19	EXOC2	0.5	0.00193487	0.5	0.00156274	0.3	0.00220629	0.3	0.00366167
19	AL590867.1	0.3	0.00193548	0.3	0.00058384	0.5	0.000370931	0.5	0.000364297
1	EPRS	0.5	0.00193729	0.3	0.00495842	0.5	0.0015169	0.5	0.00147468
18	CDH12	0.5	0.00193789	0.5	0.00182993	0.5	0.0017093	0.5	0.00245659
16	IQSEC1	0.5	0.00194513	0.5	0.00199941	0.4	0.00125514	0.4	0.00101448
10	MYOM1	0.3	0.00195116	0.5	0.00129736	0.4	0.00112365	0.5	0.0012105
8	HS3ST4	0.3	0.0019584	0.4	0.000792526	0.4	0.00152775	0.5	0.000602537
12	NRXN1	0.3	0.00196744	0.5	0.00118155	0.5	0.000840778	0.5	0.000857666
14	DSCAM	0.3	0.00196925	0.3	0.00280822	0.5	0.00278168	0.5	0.00343066
20	ETV1	0.3	0.0019789	0.5	0.00179856	0.5	0.000580824	0.5	0.000665264
5	RP11-307N16.6	0.3	0.00197951	0.3	0.00243548	0.5	0.000518098	0.5	0.000384804
5	SPATA13	0.3	0.00197951	0.3	0.00243548	0.5	0.000518098	0.5	0.000384804
15	ZNF280A	0.3	0.00199278	0.3	0.00164235	0.5	0.00245297	0.3	0.00226539
1	SMIM12	0.3	0.0019982	0.3	0.00692646	0.3	0.00161883	0.3	0.00258627
4	TMEM132B	0.3	0.00199941	0.3	0.0016701	0.5	0.00277987	0.5	0.0019204
19	FNDC1	0.3	0.00200785	0.3	0.00181606	0.3	0.00113933	0.3	0.00400063
22	KDM4C	0.3	0.00201027	0.5	0.00509533	0.3	0.000148976	0.3	0.000149579
17	EMCN	0.3	0.00201208	0.3	0.00140954	0.3	0.000133294	0.3	0.000738847
21	SDC2	0.5	0.0020157	0.4	0.00128891	0.3	0.00144754	0.3	0.002421
13	ATP9A	0.4	0.0020157	0.3	0.00155671	0.5	0.000747291	0.4	0.00115622
17	TECRL	0.3	0.00201931	0.4	0.0027274	0.3	0.00476782	0.3	0.00201449
10	DSG1	0.3	0.00204826	0.3	0.00150423	0.5	0.000789511	0.5	0.000744275
15	ELFN2	0.4	0.00206877	0.3	0.00176841	0.5	0.00149337	0.5	0.00125514
7	TMED3	0.3	0.00208023	0.4	0.00422681	0.3	0.00214356	0.3	0.00291136
17	DCHS2	0.5	0.00208144	0.5	0.00333416	0.5	0.00212728	0.5	0.0033227
1	VAV3	0.3	0.00208204	0.3	0.00138059	0.3	0.00176841	0.3	0.00246322
21	TPD52	0.3	0.00208325	0.3	0.00168698	0.3	0.00146985	0.3	0.00188059
2	ST8SIA6	0.5	0.00209169	0.3	0.00237456	0.4	0.00148372	0.3	0.0007491
4	PDE3A	0.3	0.00211159	0.3	0.00118095	0.3	0.00112305	0.4	0.00160194
18	LHFPL2	0.3	0.00211642	0.3	0.00172739	0.4	0.00116768	0.3	0.00149337
12	NBAS	0.5	0.00212004	0.5	0.00227324	0.3	0.00112244	0.3	0.000928233
15	TBC1D22A	0.5	0.00212426	0.3	0.00210315	0.3	0.00148011	0.5	0.00140109
8	CDH13	0.3	0.0021315	0.3	0.00237818	0.5	0.00248494	0.5	0.00141376
1	ESRRG	0.3	0.00213512	0.3	0.00415805	0.3	0.00187154	0.3	0.0026128
2	C10orf129	0.5	0.00214175	0.5	0.00201388	0.5	0.00202896	0.3	0.00120809
13	RIN2	0.5	0.00214658	0.3	0.00349098	0.3	0.00188542	0.3	0.00122799
19	HMGCLL1	0.5	0.0021508	0.3	0.00435709	0.3	0.00219603	0.4	0.00206756
18	MAST4	0.3	0.00215623	0.3	0.0047642	0.4	0.00170628	0.5	0.0014023
21	MCPH1	0.4	0.00216226	0.5	0.00171111	0.3	0.00450787	0.3	0.00138481
21	ANGPT2	0.4	0.00216226	0.5	0.00171111	0.3	0.00450787	0.3	0.00247227
1	HPCAL4	0.3	0.00216829	0.3	0.00206214	0.3	0.000397469	0.3	0.00033414
22	LPPR1	0.3	0.00217312	0.3	0.00253862	0.4	0.00164899	0.5	0.00227565
3	MS4A12	0.5	0.00217915	0.3	0.00350666	0.5	0.00206576	0.5	0.00157178
3	GALNT18	0.3	0.00220327	0.3	0.0015169	0.4	0.000788908	0.4	0.000621838
1	MLK4	0.5	0.00220327	0.5	0.00157118	0.5	0.00196141	0.3	0.00221956
4	PAH	0.3	0.0022081	0.3	0.00124307	0.3	0.00167432	0.4	0.00121834
11	FCER2	0.4	0.00221111	0.5	0.00290352	0.4	0.00212667	0.3	0.00177866
1	PADI4	0.5	0.00222076	0.5	0.00193668	0.5	0.00104826	0.5	0.0020929
6	GALC	0.3	0.00222378	0.3	0.00168035	0.3	0.00273162	0.3	0.00404526
16	EIF2B5	0.5	0.00222679	0.5	0.00171292	0.4	0.00216346	0.5	0.00197528
16	RP11-433C9.2	0.5	0.00222679	0.5	0.00171292	0.4	0.00216346	0.5	0.00197528
16	CNTN4	0.5	0.00222981	0.5	0.0017859	0.5	0.000632091	0.5	0.000786495
16	FGF12	0.4	0.00224187	0.3	0.00145839	0.5	0.000776845	0.5	0.000653804
19	MTHFD1L	0.5	0.00224368	0.3	0.00148614	0.3	0.0012859	0.5	0.00125996
1	OLFM3	0.5	0.00225032	0.5	0.00300545	0.5	0.00101931	0.5	0.00139687
14	TSPEAR	0.5	0.00226419	0.5	0.00148252	0.3	0.00135103	0.3	0.00117914
2	FRMD4A	0.3	0.00227263	0.3	0.00253681	0.3	0.00271051	0.3	0.00310497
20	SDK1	0.3	0.00227987	0.3	0.000952962	0.3	0.00480824	0.3	0.00116828
21	FER1L6	0.5	0.00228771	0.3	0.00147769	0.5	0.00187938	0.5	0.000867919
19	GUCA1A	0.5	0.00228952	0.4	0.00162667	0.3	0.00124729	0.4	0.00123644
19	RP1-139D8.6	0.5	0.00228952	0.4	0.00162667	0.3	0.00124729	0.4	0.00123644
17	TENM3	0.3	0.00229314	0.5	0.00318579	0.5	0.00297529	0.5	0.00260376
16	SYNPR	0.5	0.00229374	0.5	0.00431064	0.5	0.000949946	0.5	0.00124609
21	LAPTM4B	0.5	0.0023052	0.3	0.00256335	0.5	0.00168578	0.4	0.00281486
16	NLGN1	0.3	0.00231727	0.3	0.00165502	0.3	0.00255973	0.3	0.000745481
11	CYP4F3	0.4	0.0023239	0.4	0.00162365	0.3	0.00105369	0.3	0.000441499
19	ZDHHC14	0.3	0.00233053	0.3	0.00191437	0.5	0.00157601	0.5	0.00122136
21	FAM135B	0.5	0.00234018	0.5	0.00297469	0.3	0.00100724	0.3	0.00152836
12	LYPD6B	0.5	0.00234561	0.5	0.00219181	0.5	0.00125875	0.3	0.00155791
17	UGT2A1	0.3	0.00236371	0.5	0.00159108	0.3	0.00247891	0.3	0.00289628
17	UGT2A2	0.3	0.00236371	0.5	0.00159108	0.3	0.00247891	0.3	0.00289628
21	NAT1	0.5	0.00237517	0.3	0.0019011	0.3	0.00252836	0.3	0.00162124
17	SORCS2	0.5	0.00238602	0.5	0.0020549	0.3	0.00150604	0.3	0.00244875
22	37226	0.3	0.00238723	0.3	0.00102594	0.5	0.00161219	0.3	0.00166044
3	OR52E6	0.3	0.00239929	0.4	0.00123885	0.3	0.000278048	0.5	0.000111581
17	CPLX1	0.5	0.00241136	0.3	0.00352113	0.3	0.00104042	0.3	0.000785289
10	LAMA1	0.4	0.00241739	0.3	0.00290895	0.5	0.00116768	0.5	0.00112908
12	NOL10	0.3	0.00242221	0.5	0.00498556	0.5	0.0012485	0.5	0.00146623
4	NANOG	0.4	0.00243186	0.4	0.00181787	0.5	0.00123945	0.4	0.000608569
5	MCF2L	0.3	0.00244031	0.5	0.00129434	0.3	0.000995785	0.3	0.00155671
20	SEMA3E	0.3	0.00245176	0.3	0.00129494	0.5	0.000461402	0.4	0.000392041
11	ARHGEF18	0.5	0.00246202	0.5	0.00153077	0.3	0.00211521	0.5	0.00104524
11	CTD-2207O23.3	0.5	0.00246202	0.5	0.00153077	0.3	0.00211521	0.5	0.00104524
12	CAPN14	0.5	0.00247046	0.5	0.00271896	0.3	0.00261703	0.3	0.00421535
4	BEST3	0.3	0.00247891	0.3	0.00307722	0.4	0.00162969	0.3	0.00169603
6	SLC25A21	0.3	0.00250243	0.3	0.00200906	0.5	0.00261582	0.3	0.00457783
6	TSHR	0.3	0.00252113	0.3	0.00110616	0.3	0.00170568	0.4	0.0037829
11	ZSCAN18	0.3	0.00252233	0.3	0.00166105	0.3	0.000905314	0.3	0.00187878
15	CECR1	0.5	0.00253017	0.4	0.00337216	0.3	0.00198433	0.3	0.00218156
16	OR5H6	0.5	0.00253138	0.5	0.00359351	0.4	0.00317674	0.5	0.00243367
16	KCNMB3	0.5	0.00254163	0.4	0.00546505	0.3	0.00370087	0.5	0.00368217
19	TXNDC5	0.5	0.00254887	0.4	0.00235647	0.3	0.00162003	0.3	0.000753925
20	AC008060.7	0.5	0.00255008	0.3	0.00254586	0.3	0.00467615	0.3	0.00197649
9	ASIC2	0.4	0.00255551	0.3	0.0022865	0.3	0.000691802	0.3	0.00258023
13	WFDC8	0.5	0.00256033	0.3	0.00340654	0.5	0.00220026	0.5	0.00125574
20	HECW1	0.3	0.0025742	0.3	0.00109832	0.3	0.000777448	0.4	0.000548858
19	FUT9	0.5	0.0025742	0.5	0.00152414	0.4	0.000900488	0.5	0.000880585
4	PIK3C2G	0.3	0.00258325	0.4	0.00275635	0.5	0.00152594	0.4	0.00161461
17	HPSE	0.3	0.00258747	0.3	0.00753503	0.3	0.00111038	0.3	0.000592887
5	GPC6	0.5	0.00259049	0.3	0.00185345	0.4	0.00145598	0.4	0.00151629
1	TFB2M	0.3	0.00260617	0.3	0.00239386	0.3	0.000669486	0.3	0.000775035
2	TSPAN15	0.3	0.00260918	0.3	0.0025923	0.5	0.000488544	0.5	0.000583237
5	MTUS2	0.4	0.00262728	0.5	0.00269423	0.3	0.00542826	0.5	0.00531367
16	OXNAD1	0.4	0.00263753	0.3	0.0024584	0.3	0.00300605	0.5	0.00367071
16	RFTN1	0.4	0.00263753	0.3	0.0024584	0.3	0.00300605	0.5	0.00367071
8	PLCG2	0.3	0.00264115	0.5	0.00253017	0.3	0.00238844	0.5	0.000909536
1	AKNAD1	0.5	0.00264779	0.5	0.00289447	0.5	0.00126961	0.3	0.0017099
21	NKAIN3	0.3	0.0026514	0.3	0.00108565	0.3	0.00205007	0.3	0.00193186
14	RUNX1	0.3	0.00265321	0.5	0.00341679	0.5	0.00180821	0.5	0.00104464
19	SAMD3	0.3	0.0026701	0.3	0.00282089	0.3	0.00109892	0.3	0.000732212
1	CDC42BPA	0.3	0.00270207	0.5	0.00361764	0.3	0.000890235	0.3	0.00166949
19	GPLD1	0.5	0.0027274	0.5	0.00241437	0.5	0.00171292	0.5	0.00131847
1	USH2A	0.3	0.00272861	0.3	0.0013438	0.4	0.00223886	0.5	0.00175755
4	VWF	0.5	0.00273765	0.5	0.000789511	0.3	0.000180942	0.3	0.000305189
11	OCEL1	0.3	0.0027467	0.3	0.00126961	0.3	0.00268277	0.3	0.00195236
9	C17orf80	0.5	0.00278168	0.5	0.00261823	0.5	0.00243186	0.5	0.00188361
4	DRAM1	0.3	0.00279978	0.3	0.00464237	0.5	0.000843793	0.5	0.0008643
1	LEMD1	0.5	0.00281606	0.5	0.00343549	0.5	0.00210074	0.3	0.00316166
3	MMP20	0.5	0.00282752	0.5	0.00386613	0.5	0.00237758	0.5	0.0027081
19	PHACTR1	0.4	0.00282812	0.5	0.00297529	0.3	0.000846206	0.3	0.00127323
19	ZNF391	0.3	0.00282993	0.5	0.00144935	0.3	0.00215985	0.3	0.00344273
1	OR14C36	0.3	0.00283054	0.5	0.00237456	0.5	0.00224368	0.5	0.00183596
12	SCN1A	0.3	0.0028426	0.3	0.00264055	0.3	0.00134138	0.5	0.00177444
8	MPHOSPH6	0.3	0.0028613	0.3	0.00311281	0.3	0.00287336	0.3	0.00192161
17	FAM184B	0.5	0.00287638	0.5	0.00257843	0.5	0.00168698	0.3	0.00376601
7	GABRB3	0.3	0.0028818	0.4	0.0030543	0.3	0.00425214	0.4	0.00266226
20	POU6F2	0.5	0.00288482	0.5	0.00200544	0.3	0.00158746	0.4	0.00251268
18	PDZD2	0.5	0.0029192	0.3	0.000977087	0.3	0.000942105	0.4	0.00139084
20	PRKAG2	0.5	0.00292523	0.5	0.0031116	0.3	0.0024385	0.3	0.00222619
9	KRT14	0.5	0.00298132	0.5	0.00352053	0.5	0.00410256	0.5	0.00363151
6	TTC6	0.4	0.00299218	0.5	0.00216226	0.5	0.00155188	0.5	0.000819065
22	ADAMTSL1	0.4	0.00300545	0.3	0.00305732	0.5	0.00343911	0.5	0.00250243
12	GRHL1	0.3	0.00300907	0.3	0.00306214	0.3	0.00517736	0.3	0.00304706
9	SHISA6	0.3	0.0030163	0.3	0.00139748	0.3	0.00181606	0.3	0.00221473
2	BICC1	0.3	0.00303621	0.3	0.00185767	0.5	0.000366106	0.5	0.000321474
20	NRCAM	0.4	0.00304405	0.5	0.00196503	0.3	0.00205249	0.3	0.00435226
8	CFDP1	0.5	0.00304586	0.3	0.00158385	0.4	0.00352837	0.5	0.00205309
10	L3MBTL4	0.5	0.00305189	0.5	0.00205852	0.5	0.00063571	0.5	0.00105308
9	NPLOC4	0.3	0.00305611	0.4	0.00254887	0.4	0.00207118	0.4	0.00165019
18	ANKH	0.5	0.00307541	0.5	0.00305973	0.3	0.00251027	0.3	0.00492042
16	FNDC3B	0.5	0.00311281	0.5	0.00234682	0.4	0.0028613	0.5	0.0020549
9	CCDC57	0.5	0.00311643	0.5	0.00239266	0.5	0.00182209	0.5	0.00127142
16	GPD1L	0.5	0.00312487	0.3	0.00444575	0.4	0.00223825	0.3	0.00231666
10	PIEZO2	0.3	0.00313392	0.5	0.00350606	0.5	0.00231304	0.5	0.00183898
16	ZPLD1	0.4	0.00313573	0.3	0.0027087	0.5	0.000862491	0.4	0.00141316
4	CMKLR1	0.5	0.00317312	0.5	0.0040151	0.4	0.00312005	0.4	0.00395901
17	NPNT	0.3	0.00317493	0.3	0.00384743	0.5	0.00389749	0.3	0.0048788
2	SORCS1	0.4	0.00318639	0.3	0.0043016	0.3	0.00112486	0.3	0.001921
19	SYNE1	0.3	0.00321413	0.5	0.00433537	0.5	0.00405069	0.3	0.00462428
3	POLD3	0.3	0.00323766	0.3	0.00474671	0.4	0.00137094	0.5	0.00125212
11	CTD-3138B18.4	0.5	0.0032461	0.5	0.00193608	0.5	0.00371836	0.5	0.00306033
11	ZNF544	0.5	0.0032461	0.5	0.00193608	0.5	0.00371836	0.5	0.00306033
1	KAZN	0.3	0.0032467	0.5	0.0033034	0.3	0.00472138	0.4	0.00419303
7	KIAA1024	0.4	0.00326962	0.5	0.00634021	0.3	0.00146141	0.3	0.00304043
12	GALNT14	0.4	0.00329797	0.3	0.00296805	0.3	0.00135164	0.3	0.00184139
18	MYO10	0.5	0.00330038	0.5	0.00280882	0.5	0.0018438	0.5	0.00203319
10	CCBE1	0.3	0.00332451	0.5	0.00300304	0.3	0.00101328	0.5	0.00164597
18	ANKRD33B	0.3	0.00334683	0.3	0.00257541	0.5	0.00290593	0.5	0.00196925
16	SLC9A9	0.5	0.00338181	0.5	0.00357421	0.4	0.00158867	0.5	0.00146744
21	SCARA5	0.5	0.00350786	0.4	0.00362367	0.4	0.00177685	0.3	0.00229374
2	ADAM12	0.5	0.00350967	0.3	0.00334743	0.5	0.00338482	0.5	0.002535
21	OC90	0.5	0.00352777	0.4	0.00253259	0.4	0.00293187	0.4	0.00365262
2	MTPAP	0.4	0.00358507	0.5	0.00383597	0.4	0.0029186	0.3	0.00248313
17	BANK1	0.3	0.00360678	0.3	0.00275575	0.5	0.00210375	0.5	0.00148372
4	TULP3	0.4	0.0036291	0.4	0.00554769	0.5	0.00197589	0.5	0.0024391
20	PTPRN2	0.3	0.00367132	0.3	0.00576542	0.5	0.000992769	0.5	0.00115079
5	DLEU7	0.5	0.00369423	0.5	0.00428471	0.5	0.00181666	0.5	0.00189627
18	DNAH5	0.5	0.00369544	0.5	0.00433417	0.4	0.00182571	0.5	0.00336854
2	ECHDC3	0.3	0.0038028	0.5	0.00315804	0.3	0.00309049	0.4	0.004225
14	SPATC1L	0.5	0.00386191	0.3	0.00306516	0.3	0.00234682	0.3	0.0021888
2	RBM20	0.4	0.00386915	0.3	0.00365563	0.4	0.00102353	0.3	0.00153198
15	ZNF74	0.5	0.00389689	0.4	0.00468218	0.3	0.00145116	0.4	0.00169603
16	EPHB1	0.3	0.00395841	0.5	0.00552356	0.5	0.00366106	0.5	0.00306094
21	ASAP1	0.5	0.00398495	0.5	0.00200906	0.4	0.00262306	0.3	0.00236129
21	SAMD12	0.3	0.00399701	0.3	0.00361221	0.3	0.00190653	0.5	0.00168698
19	ZFP57	0.5	0.00401209	0.3	0.00132872	0.3	0.000718943	0.3	0.00106213
4	C12orf36	0.3	0.00402475	0.3	0.0063185	0.3	0.00228108	0.3	0.00142944
16	MB21D2	0.3	0.0040525	0.5	0.00514539	0.5	0.00112667	0.5	0.0013631
12	LRRFIP1	0.5	0.00407301	0.5	0.00408688	0.5	0.00192281	0.4	0.0031695
20	PDE1C	0.5	0.00410377	0.5	0.00385226	0.5	0.00278349	0.5	0.0021502
2	BLNK	0.4	0.00411583	0.3	0.00189145	0.3	0.00557663	0.3	0.00429617
8	PRKCB	0.4	0.00416891	0.5	0.00336974	0.3	0.00150363	0.3	0.000836556
14	TMPRSS2	0.5	0.00417192	0.4	0.00504105	0.5	0.00205188	0.5	0.00223765
18	ITGA2	0.3	0.00422801	0.3	0.00370992	0.3	0.00290111	0.3	0.00287276
18	XRCC4	0.4	0.00423404	0.5	0.00247891	0.5	0.00128228	0.5	0.000598918
1	KIF26B	0.5	0.00424731	0.3	0.00617616	0.5	0.00202414	0.5	0.00204284
21	RIMS2	0.3	0.00426239	0.3	0.00334803	0.3	0.00401691	0.3	0.00469907
11	MARK4	0.3	0.004263	0.3	0.00325394	0.5	0.00262426	0.5	0.00255551
12	COBLL1	0.4	0.00433115	0.5	0.00501752	0.3	0.0070682	0.3	0.00606699
18	ERAP1	0.3	0.00436613	0.5	0.00540896	0.3	0.00126177	0.3	0.00118819
1	NOS1AP	0.3	0.00445238	0.3	0.00258265	0.3	0.00384261	0.3	0.00501994
15	SYN3	0.4	0.00446445	0.5	0.00617314	0.5	0.00425335	0.4	0.00312668
12	GPR39	0.5	0.00446625	0.3	0.00428712	0.3	0.00343669	0.5	0.00542887
3	NELL1	0.5	0.00450606	0.3	0.00134319	0.5	0.00464237	0.3	0.00182691
17	TMEM192	0.5	0.0045525	0.5	0.00166467	0.3	0.00299158	0.3	0.0017485
19	PERP	0.5	0.00462729	0.5	0.0033221	0.4	0.00202052	0.3	0.00158385
13	SLX4IP	0.5	0.00463091	0.3	0.00273343	0.5	0.00341438	0.3	0.00261401
9	PRKCA	0.5	0.0047244	0.5	0.00341377	0.5	0.00345057	0.5	0.00401872
21	PDP1	0.5	0.00483357	0.5	0.00389327	0.4	0.00290774	0.5	0.00209832
21	HHLA1	0.3	0.00486795	0.5	0.00380883	0.4	0.00261944	0.3	0.00267191
12	C2orf54	0.3	0.00489087	0.3	0.00903384	0.5	0.00156515	0.5	0.00137999
20	CALD1	0.3	0.00492162	0.4	0.00401088	0.3	0.00239447	0.5	0.00224308
18	RP11-45H22.3	0.5	0.00494635	0.5	0.00201087	0.4	0.00170387	0.5	0.00129675
16	NAALADL2	0.3	0.00494816	0.3	0.00232028	0.5	0.00294091	0.5	0.00220568
20	CACNA2D1	0.5	0.00496204	0.5	0.00524792	0.3	0.00263331	0.3	0.00219784
9	B3GNTL1	0.3	0.00500245	0.3	0.00338482	0.3	0.00282089	0.3	0.00229676
12	STON1-GTF2A1L	0.3	0.0050519	0.3	0.0039759	0.3	0.00359592	0.3	0.00466589
12	GTF2A1L	0.3	0.0050519	0.3	0.0039759	0.3	0.00373826	0.3	0.0048975
12	LHCGR	0.3	0.0050519	0.3	0.0039759	0.3	0.00373826	0.3	0.0048975
7	SLC28A1	0.4	0.00510619	0.4	0.00282692	0.3	0.00238361	0.5	0.00403501
9	TMEM220	0.3	0.00513514	0.3	0.00535287	0.5	0.00236733	0.5	0.00252897
1	KCNK2	0.3	0.00515082	0.3	0.00450787	0.5	0.00069904	0.5	0.000621838
22	EHMT1	0.3	0.00517856	0.3	0.00299942	0.3	0.00199157	0.3	0.00326721
20	CREB5	0.3	0.00530341	0.4	0.00358265	0.3	0.00353923	0.5	0.00135888
3	GAS2	0.3	0.00545118	0.3	0.00387096	0.3	0.00406396	0.3	0.00397228
20	TES	0.3	0.0054729	0.5	0.00214477	0.3	0.00397228	0.3	0.00319483
3	PLEKHA7	0.3	0.00549099	0.5	0.00336793	0.5	0.00212064	0.5	0.00196744
18	TENM2	0.3	0.00553381	0.3	0.00403802	0.3	0.00341317	0.3	0.00256576
15	ISX	0.3	0.00576964	0.5	0.00482693	0.5	0.0037069	0.5	0.00321836
7	RORA	0.3	0.00593731	0.5	0.00383054	0.3	0.00181244	0.3	0.00193548
2	CCDC3	0.3	0.00649944	0.5	0.00365141	0.5	0.000701452	0.4	0.00156153
2	ASAH2	0.5	0.00674311	0.3	0.00635589	0.4	0.00475335	0.3	0.00169362
16	PEX5L	0.3	0.00691078	0.3	0.0057998	0.3	0.00463574	0.5	0.00302173
16	XXYLT1	0.3	0.00692405	0.5	0.00706579	0.3	0.00473525	0.3	0.00437337
1	PTGER3	0.3	0.0113975	0.3	0.00590897	0.5	0.00212969	0.5	0.00218096
15	MICAL3	0.3	0.0129362	0.3	0.00458809	0.3	0.000797351	0.3	0.00197589

## Sheet: Introgression_Outliers_TSI
chr	start	end	id	nsnps	v2014n	v2016n	s2014n	gene	v2014med	v2016med	s2014med
12	113358865	113361864	12|113358864|113361864	23	0	13	13	OAS1	0	0.38	0.38
12	113361865	113364864	12|113361864|113364864	20	0	14	14	OAS1	0	0.4	0.4
12	113363365	113366364	12|113363364|113366364	22	0	11	11	OAS1	0	0.4	0.4
12	113364865	113367864	12|113364864|113367864	23	0	14	14	OAS1	0	0.4	0.4
16	78097507	78100506	16|78097506|78100506	50	20	20	20	CLEC3A	0.28	0.28	0.28
nsnps	total number of snps used in ncd calculation
v2014n	inferred number of neanderthal SNPs, conditioned by the map from Vernot et. al. 2014
v2016n	inferred number of neanderthal SNPs, conditioned by the map from Vernot et. al. 2016
s2014n	inferred number of neanderthal SNPs, conditioned by the map from Sankararaman et. al. 2014
"x"med	median allele frequency of introgressed SNPs

## Sheet: Introgression_Outliers_GBR
chr	start	end	id	nsnps	v2014n	v2016n	s2014n	gene	v2014med	v2016med	s2014med
12	113358865	113361864	12|113358864|113361864	20	0	13	13	OAS1	0	0.28	0.28
12	113363365	113366364	12|113363364|113366364	21	0	11	11	OAS1	0	0.29	0.29
12	113364865	113367864	12|113364864|113367864	23	0	14	14	OAS1	0	0.29	0.29
16	78097507	78100506	16|78097506|78100506	50	20	20	20	CLEC3A	0.39	0.39	0.39
nsnps	total number of snps used in ncd calculation
v2014n	inferred number of neanderthal SNPs, conditioned by the map from Vernot et. al. 2014
v2016n	inferred number of neanderthal SNPs, conditioned by the map from Vernot et. al. 2016
s2014n	inferred number of neanderthal SNPs, conditioned by the map from Sankararaman et. al. 2014
"x"med	median allele frequency of introgressed SNPs

## Sheet: Introgression_Significant_TSI
chr	start	end	id	nsnps	v2014n	v2016n	s2014n	gene	v2014med	v2016med	s2014med
3	2433679	2436678	3|2433678|2436678	24	9	9	9	CNTN4	0.26	0.26	0.26
3	2435179	2438178	3|2435178|2438178	25	11	11	11	CNTN4	0.33	0.33	0.33
4	121714617	121717616	4|121714616|121717616	26	7	7	0	PRDM5	0.25	0.25	0
5	24577419	24580418	5|24577418|24580418	28	0	14	14	CDH10	0	0.5	0.5
6	66151906	66154905	6|66151905|66154905	21	13	0	13	EYS	0.26	0	0.26
6	66153406	66156405	6|66153405|66156405	18	10	0	10	EYS	0.26	0	0.26
6	66154906		6|66154905|66157905	26	14	0	14	EYS	0.26	0	0.26
6	66156406	66159405	6|66156405|66159405	27	16	0	16	EYS	0.26	0	0.26
6	66159406	66162405	6|66159405|66162405	33	20	0	20	EYS	0.26	0	0.26
7	136611872	136614871	7|136611871|136614871	23	8	8	8	CHRM2	0.32	0.32	0.32
12	28659885	28662884	12|28659884|28662884	18	8	0	8	CCDC91	0.39	0	0.39
12	113358865	113361864	12|113358864|113361864	23	0	13	13	OAS1	0	0.38	0.38
12	113360365	113363364	12|113360364|113363364	23	0	17	17	OAS1	0	0.4	0.4
12	113361865	113364864	12|113361864|113364864	20	0	14	14	OAS1	0	0.4	0.4
12	113363365	113366364	12|113363364|113366364	22	0	11	11	OAS1	0	0.4	0.4
12	113364865	113367864	12|113364864|113367864	23	0	14	14	OAS1	0	0.4	0.4
12	113366365	113369364	12|113366364|113369364	18	0	9	9	OAS1	0	0.4	0.4
16	78096007	78099006	16|78096006|78099006	51	18	18	18	CLEC3A	0.28	0.28	0.28
16	78097507	78100506	16|78097506|78100506	50	20	20	20	CLEC3A	0.28	0.28	0.28
16	78099007	78102006	16|78099006|78102006	41	17	17	17	CLEC3A	0.28	0.28	0.28
nsnps	total number of snps used in ncd calculation
v2014n	inferred number of neanderthal SNPs, conditioned by the map from Vernot et. al. 2014
v2016n	inferred number of neanderthal SNPs, conditioned by the map from Vernot et. al. 2016
s2014n	inferred number of neanderthal SNPs, conditioned by the map from Sankararaman et. al. 2014
"x"med	median allele frequency of introgressed SNPs

[truncated: 1 more sheets: Introgression_Significant_GBR]
