# Supplementary material for: Signatures of Long-Term Balancing Selection in Human Genomes
Source: Genome Biol Evol. 2018 Mar 15;10(3):939–55. doi: 10.1093/gbe/evy054 (PMC5952967; doi:10.1093/gbe/evy054)
Supplement: Supplementary Materials [file evy054_supp.zip › S5_Table_GBE.xlsx]

## Sheet: Sheet1
Legend
This speadsheet contains 25 sheets
For enrichment analyses (first sheet)
			CATEGORY	DESCRIPTION IN ENSEMBL
			intergenic	|upstream_gene_variant	|downstream_gene_variant	|intergenic_variant
			genic	|transcript_ablation	|splice_acceptor_variant	|splice_donor_variant	|stop_gained	|frameshift_variant	|stop_lost	|start_lost	|transcript_amplification	|missense_variant	|protein_altering_variant	|incomplete_terminal_codon_variant	|stop_retained_variant	|synonymous_variant	|coding_sequence_variant	|mature_miRNA_variant	|5_prime_UTR_variant	|3_prime_UTR_variant	|non_coding_transcript_exon_variant	|intron_variant	|NMD_transcript_variant	|non_coding_transcript_variant
			exonic	|stop_gained	|frameshift_variant	|stop_lost	|start_lost	|stop_gained	|missense_variant	|protein_altering_variant	|incomplete_terminal_codon_variant	|stop_retained_variant	|synonymous_variant	|coding_sequence_variant	|mature_miRNA_variant	|non_coding_transcript_exon_variant
			regulatory	|TFBS_ablation	|TFBS_amplification	|TF_binding_site_variant	|regulatory_region_ablation	|regulatory_region_amplification	|regulatory_region_variant
			synonymous	|synonymous
			non-synonymous	|missense
The remaining 24 sheets are bedfiles from the candidate sets of windows.
For bedfiles columns are as follows: chromosome, beginning of window, end of window.

## Sheet: ENRICHMENT ANALYSES
						YRI		LWK		TSI		GBR
						Outliers	Significant	Outliers	Significant	Outliers	Significant	Outliers	Significant
					nonsynonymous / nonsynonymous + synonymous	0.022	0.004	0.009	0.002	0.104	0.013	0.115	0.037
					genic / genic + intergenic	1.000	1.000	1.000	1.000	1.000	1.000	1.000	1.000
					regulatory / regulatory + genic	0.010	0.000	0.058	0.000	0.060	0.106	0.027	0.051
					regulatory/ regulatory + intergenic	0.971	1.000	0.992	1.000	0.977	1.000	0.950	1.000
					exonic / genic	0.000	0.000	0.000	0.000	0.000	0.003	0.000	0.000
					exonic / exonic + intergenic	0.010	0.728	0.001	0.749	0.044	0.785	0.048	0.683
					exonic / exonic + regulatory	0.000	0.005	0.000	0.014	0.003	0.012	0.000	0.016
					nonsynonymous / nonsynonymous + regulatory	0.036	0.563	0.026	0.771	0.075	0.458	0.138	0.734
					exonic / all	0.000	0.013	0.000	0.012	0.001	0.088	0.001	0.061
					regulatory / all	0.458	0.680	0.644	0.514	0.563	0.903	0.479	0.781
					RegDB 1	0.577	1.000	0.634	1.000	0.794	1.000	0.737	1.000
					RegDB 2	0.873	0.999	0.911	1.000	0.847	0.998	0.836	0.999
					RegDB 3	0.038	0.627	0.036	0.831	0.007	0.346	0.005	0.362
					RegDB 4	0.091	0.966	0.095	0.999	0.055	0.936	0.042	0.958
					RegDB 5	0.883	0.989	0.877	0.924	0.977	0.980	0.962	0.980
					RegDB 6	0.404	0.003	0.442	0.007	0.257	0.013	0.290	0.001
					RegDB 7	0.276	0.000	0.243	0.000	0.215	0.000	0.304	0.000
					RegDB 1(abc)+2(abc)	0.905	0.999	0.937	1.000	0.880	0.999	0.859	1.000
					RegDB 1(de)+3(ab)	0.038	0.715	0.039	0.882	0.009	0.440	0.005	0.506
					RegDB 1f+5	0.891	1.000	0.893	0.997	0.988	0.999	0.977	0.997
				Intermediate frequencies	RegDB 1	0.305	0.998	0.279	1.000	0.560	0.957	0.516	0.990
					RegDB 2	0.959	1.000	0.972	1.000	0.964	1.000	0.961	1.000
					RegDB 3	0.151	0.735	0.164	0.923	0.117	0.896	0.129	0.891
					RegDB 4	0.466	0.998	0.363	1.000	0.596	1.000	0.561	0.999
					RegDB 5	0.899	1.000	0.927	0.998	0.992	0.999	0.989	0.999
					RegDB 6	0.239	0.001	0.235	0.000	0.046	0.000	0.049	0.000
					RegDB 7	0.119	0.000	0.085	0.000	0.019	0.000	0.035	0.000
					RegDB 1(abc)+2(abc)	0.956	1.000	0.969	1.000	0.967	1.000	0.960	1.000
					RegDB 1(de)+3(ab)	0.138	0.767	0.147	0.929	0.121	0.911	0.122	0.909
					RegDB 1f+5	0.877	1.000	0.916	0.999	0.992	1.000	0.986	0.999
					nonsynonymous / nonsynonymous + synonymous	0.056	0.000	0.011	0.003	0.242	0.000	0.186	0.001
				CANDIDATE WINDOWS
						YRI		LWK		TSI		GBR
				proportion	Category	Outliers	Significant	Outliers	Significant	Outliers	Significant	Outliers	Significant
					Intergenic	0.606963	0.540326	0.596341	0.546215	0.589143	0.530845	0.596902	0.531521
					Genic	0.366409	0.434209	0.379151	0.42787	0.385369	0.444819	0.376853	0.44335
					Exonic	0.026039	0.0151617	0.02697	0.0152629	0.0251333	0.0156957	0.0243787	0.0154028
					Regulatory	0.0266274	0.0254653	0.0245075	0.0259153	0.0254889	0.0243358	0.0262454	0.0251289
					Nonsynonymous	0.0054677	0.00341708	0.00525328	0.00331802	0.00549706	0.00380386	0.00501505	0.00348495
					Synonymous	0.00360427	0.00292679	0.00337711	0.00285504	0.00396554	0.00302542	0.00364984	0.00293152
				counts	Total nb of sites (unique)	40785	267187	42640	259191	36565	181132	35892	182499
					Intergenic	24755	144368	25428	141574	21542	96153	21424	97002
					Genic	14944	116015	16167	110900	14091	80571	13526	80911
					Exonic	1062	4051	1150	3956	919	2843	875	2811
					Regulatory	1086	6804	1045	6717	932	4408	942	4586
					Nonsynonymous	223	913	224	860	201	689	180	636
					Synonymous	147	782	144	740	145	548	131	535
				CONTROL WINDOWS
						YRI	LWK	TSI	GBR
				proportion	Intergenic	0.455051	0.454482	0.456045	0.457035
					Genic	0.518863	0.519462	0.517631	0.516734
					Exonic	0.0132713	0.0132435	0.0142328	0.0137114
					Regulatory	0.0260861	0.0260554	0.026324	0.026231
					Nonsynonymous	0.00357524	0.00356529	0.00409244	0.00386888
					Synonymous	0.00374486	0.00372023	0.00396664	0.00379407
				counts	Total nb of sites (unique)	12504073	13237625	7710557	7511985
					Intergenic	5689992	6016266	3516361	3433239
					Genic	6487899	6876448	3991223	3881699
					Exonic	165945	175313	109743	103000
					Regulatory	326182	344911	202973	197047
					Nonsynonymous	44705	47196	31555	29063
					Synonymous	46826	49247	30585	28501
				CANDIDATE WINDOWS - ALL SNPs											CANDIDATE WINDOWS - 0.2<MAF<0.8 SNPs
						YRI		LWK		TSI		GBR					YRI		LWK		TSI		GBR
				counts	RegDB score	Outliers	Significant	Outliers	Significant	Outliers	Significant	Outliers	Significant		counts	RegDB score	Outliers	Significant	Outliers	Significant	Outliers	Significant	Outliers	Significant
					1	419	1561	431	1413	427	1688	435	1617			1	304	1168	314	1051	326	1367	344	1324
					2	825	5147	834	4881	743	3497	738	3386			2	434	2540	442	2307	423	2066	428	2084
					3	1408	6866	1454	6491	1349	4815	1372	4826			3	756	3507	744	3178	748	2832	765	2920
					4	3649	18963	3797	17720	3361	12986	3346	12975			4	1911	9473	1971	8636	1835	7819	1877	7893
					5	10234	65576	10727	64533	8814	44022	8753	44431			5	6014	33344	6027	31719	5649	27807	5759	28538
					6	11820	76244	12238	74486	10858	52203	10751	53033			6	7161	40175	7185	38104	7430	34357	7511	35564
					7	14744	97445	15380	94836	13322	65453	13020	66016			7	8934	50849	9030	48130	9190	42747	9149	43971
					1a+1b+1c+2a+2b+2c	850	5249	859	4981	770	3617	765	3506			1a+1b+1c+2a+2b+2c	454	2615	460	2378	446	2165	453	2187
					1d+1e+3a+3b	1441	6988	1493	6608	1384	4942	1413	4937			1d+1e+3a+3b	779	3598	773	3265	772	2928	797	3012
					1f+5	10595	66913	11094	65729	9179	45463	9120	45817			1f+5	6275	34346	6294	32612	5928	28979	6046	29667
					TOTAL	43099	271802	44861	264360	38874	184664	38415	186284			TOTAL	25514	141056	25713	133125	25601	118995	25833	122294
				proportion	1	0.0097218	0.00574315	0.00960745	0.00534498	0.0109842	0.00914093	0.0113237	0.00868029		proportion	1	0.011915	0.0082804	0.0122117	0.00789484	0.0127339	0.0114879	0.0133163	0.0108264
					2	0.019142	0.0189366	0.0185908	0.0184635	0.019113	0.0189371	0.0192112	0.0181765			2	0.0170103	0.018007	0.0171897	0.0173296	0.0165228	0.0173621	0.016568	0.0170409
					3	0.032669	0.025261	0.0324112	0.0245536	0.0347019	0.0260744	0.0357152	0.0259067			3	0.0296308	0.0248625	0.0289348	0.0238723	0.0292176	0.0237993	0.0296133	0.0238769
					4	0.0846655	0.0697677	0.0846392	0.0670298	0.0864588	0.0703223	0.0871014	0.0696517			4	0.0749001	0.0671577	0.0766538	0.0648714	0.0716769	0.0657086	0.072659	0.0645412
					5	0.237453	0.241264	0.239116	0.24411	0.226733	0.23839	0.227854	0.238512			5	0.235714	0.236388	0.234395	0.238265	0.220655	0.233682	0.222932	0.233356
					6	0.274252	0.280513	0.272798	0.28176	0.279313	0.282692	0.279865	0.284689			6	0.280669	0.284816	0.279431	0.286227	0.290223	0.288726	0.290752	0.290807
					7	0.342096	0.358515	0.342837	0.358738	0.342697	0.354444	0.33893	0.354384			7	0.350161	0.360488	0.351184	0.36154	0.35897	0.359234	0.354159	0.359552
					1a+1b+1c+2a+2b+2c	0.019722	0.0193119	0.019148	0.0188417	0.0198076	0.0195869	0.0199141	0.0188207			1a+1b+1c+2a+2b+2c	0.0177942	0.0185387	0.0178898	0.0178629	0.0174212	0.018194	0.0175357	0.0178831
					1d+1e+3a+3b	0.0334347	0.0257099	0.0332806	0.0249962	0.0356022	0.0267621	0.0367825	0.0265025			1d+1e+3a+3b	0.0305323	0.0255076	0.0300626	0.0245258	0.0301551	0.0246061	0.030852	0.0246292
					1f+5	0.245829	0.246183	0.247297	0.248634	0.236122	0.246193	0.237407	0.245952			1f+5	0.245943	0.243492	0.244779	0.244973	0.231553	0.243531	0.234042	0.242588
				CONTROL WINDOWS - ALL SNPs											CONTROL WINDOWS - 0.2<MAF<0.8 SNPs
				counts	RegDB score	YRI	LWK	TSI	GBR						counts	RegDB score	YRI	LWK	TSI	GBR
					1	93366	95221	95171	94920							1	54230	55141	63609	63611
					2	634861	675259	396506	379866							2	121954	121643	110636	110062
					3	686829	731463	425429	409836							3	136907	136471	124618	124295
					4	2001920	2126903	1246141	1193250							4	398096	397444	362529	361786
					5	6548608	6967218	4047211	3896552							5	1332790	1325511	1203629	1201233
					6	6763617	7222454	4185479	4115779							6	1435860	1426831	1318571	1314807
					7	8539234	9109304	5243651	5127331							7	1770913	1760753	1613465	1609336
					1a+1b+1c+2a+2b+2c	643737	684261	405073	388384							1a+1b+1c+2a+2b+2c	127080	126770	116125	115600
					1d+1e+3a+3b	693555	738323	432254	416641							1d+1e+3a+3b	140849	140461	129130	128827
					1f+5	6626372	7046577	4126990	3976149							1f+5	1377952	1371535	1257237	1254774
					TOTAL	25268435	26927822	15639588	15217534							TOTAL	5250750	5223794	4797057	4785130
				proportion	1	0.00369497	0.00353616	0.00608526	0.00623754						proportion	1	0.010328	0.0105557	0.01326	0.0132935
					2	0.0251247	0.0250766	0.0253527	0.0249624							2	0.023226	0.0232863	0.0230633	0.0230008
					3	0.0271813	0.0271638	0.0272021	0.0269318							3	0.0260738	0.0261249	0.025978	0.0259753
					4	0.0792261	0.0789853	0.0796786	0.0784128							4	0.075817	0.0760834	0.0755732	0.0756063
					5	0.259162	0.258737	0.25878	0.256057							5	0.253829	0.253745	0.25091	0.251035
					6	0.267671	0.268215	0.267621	0.270463							6	0.273458	0.273141	0.274871	0.274769
					7	0.337941	0.338286	0.335281	0.336936							7	0.337269	0.337064	0.336345	0.33632
					1a+1b+1c+2a+2b+2c	0.0254759	0.0254109	0.0259005	0.0255221							1a+1b+1c+2a+2b+2c	0.0242023	0.0242678	0.0242076	0.0241582
					1d+1e+3a+3b	0.0274475	0.0274186	0.0276385	0.027379							1d+1e+3a+3b	0.0268245	0.0268887	0.0269186	0.0269224
					1f+5	0.262239	0.261684	0.263881	0.261287							1f+5	0.26243	0.262555	0.262085	0.262224

## Sheet: SIGNIF_tf0.5.LWK
1	2916088	2919088
1	4459620	4462620
1	4596120	4599120
1	4597620	4600620
1	5305620	5308620
1	7960702	7963702
1	9093202	9096202
1	14424088	14427088
1	14457088	14460088
1	14478088	14481088
1	15280588	15283588
1	15456088	15459088
1	15510088	15513088
1	15511588	15514588
1	15553588	15556588
1	15555088	15558088
1	16150605	16153605
1	16374105	16377105
1	16380105	16383105
1	17400105	17403105
1	17401605	17404605
1	17421105	17424105
1	17649105	17652105
1	17716605	17719605
1	17718105	17721105
1	17719605	17722605
1	18123105	18126105
1	18829605	18832605
1	19173124	19176124
1	19200124	19203124
1	19936624	19939624
1	20944624	20947624
1	22305108	22308108
1	24198108	24201108
1	24199608	24202608
1	24207108	24210108
1	24930282	24933282
1	25182282	25185282
1	25183782	25186782
1	26167782	26170782
1	29802214	29805214
1	30520714	30523714
1	30738214	30741214
1	30862585	30865585
1	30990085	30993085
1	31671085	31674085
1	34039916	34042916
1	34654916	34657916
1	34656416	34659416
1	40153593	40156593
1	54156261	54159261
1	55518112	55521112
1	57067612	57070612
1	57069112	57072112
1	57445612	57448612
1	58525753	58528753
1	59020753	59023753
1	59464753	59467753
1	59466253	59469253
1	63412791	63415791
1	64660935	64663935
1	66124935	66127935
1	66126435	66129435
1	66127935	66130935
1	66132435	66135435
1	68871088	68874088
1	70582095	70585095
1	70975095	70978095
1	71011095	71014095
1	71152095	71155095
1	73851108	73854108
1	73855608	73858608
1	76747933	76750933
1	77104933	77107933
1	77106433	77109433
1	77107933	77110933
1	77109433	77112433
1	77110933	77113933
1	78630433	78633433
1	80290601	80293601
1	80845601	80848601
1	80847101	80850101
1	81400601	81403601
1	81402101	81405101
1	81957170	81960170
1	83145170	83148170
1	83164670	83167670
1	83166170	83169170
1	86457087	86460087
1	86458587	86461587
1	86464587	86467587
1	88476150	88479150
1	91278143	91281143
1	91284143	91287143
1	91642643	91645643
1	92095643	92098643
1	92391143	92394143
1	93520643	93523643
1	94228650	94231650
1	94230150	94233150
1	94239150	94242150
1	94240650	94243650
1	94246650	94249650
1	94248150	94251150
1	94264650	94267650
1	94444650	94447650
1	94461150	94464150
1	94465650	94468650
1	94467150	94470150
1	95149650	95152650
1	96151650	96154650
1	100149083	100152083
1	100933583	100936583
1	101031083	101034083
1	102067583	102070583
1	102069083	102072083
1	102084083	102087083
1	102085583	102088583
1	102234083	102237083
1	102235583	102238583
1	102408083	102411083
1	102814583	102817583
1	102816083	102819083
1	102828083	102831083
1	102829583	102832583
1	102834085	102837085
1	103594585	103597585
1	104713585	104716585
1	105289585	105292585
1	105499585	105502585
1	105501085	105504085
1	105790585	105793585
1	105940068	105943068
1	106115568	106118568
1	106720068	106723068
1	106724568	106727568
1	106739568	106742568
1	107563068	107566068
1	108079068	108082068
1	108083568	108086568
1	108085068	108088068
1	108242568	108245568
1	108500568	108503568
1	108565068	108568068
1	108653568	108656568
1	108695568	108698568
1	109366525	109369525
1	111580525	111583525
1	111582025	111585025
1	111583525	111586525
1	111795025	111798025
1	111906306	111909306
1	114526806	114529806
1	114528306	114531306
1	116089603	116092603
1	116730103	116733103
1	116731603	116734603
1	116733103	116736103
1	116734603	116737603
1	116736103	116739103
1	116737603	116740603
1	116739103	116742103
1	117472603	117475603
1	117873092	117876092
1	118354592	118357592
1	118356092	118359092
1	120084092	120087092
1	120085592	120088592
1	120087092	120090092
1	120331592	120334592
1	120333092	120336092
1	120334592	120337592
1	152607210	152610210
1	152689710	152692710
1	152691210	152694210
1	152692710	152695710
1	152694210	152697210
1	152964210	152967210
1	152970210	152973210
1	152971710	152974710
1	152973210	152976210
1	152974710	152977710
1	152982210	152985210
1	152983710	152986710
1	152985210	152988210
1	153001710	153004710
1	153003210	153006210
1	153004710	153007710
1	153133710	153136710
1	153469710	153472710
1	157194269	157197269
1	157195769	157198769
1	157203269	157206269
1	157204769	157207769
1	157594769	157597769
1	157596269	157599269
1	157597769	157600769
1	158158769	158161769
1	158196269	158199269
1	158344769	158347769
1	158350769	158353769
1	158463269	158466269
1	158496269	158499269
1	158497769	158500769
1	158713769	158716769
1	158733269	158736269
1	158841269	158844269
1	158943269	158946269
1	159000269	159003269
1	159987091	159990091
1	160404091	160407091
1	160536091	160539091
1	162030091	162033091
1	162835591	162838591
1	166732617	166735617
1	167524617	167527617
1	170832093	170835093
1	171799593	171802593
1	179449820	179452820
1	179451320	179454320
1	179452820	179455820
1	179686820	179689820
1	181159632	181162632
1	181180632	181183632
1	181183632	181186632
1	181185132	181188132
1	181203132	181206132
1	182508132	182511132
1	183094632	183097632
1	183154632	183157632
1	183156132	183159132
1	183159132	183162132
1	183160632	183163632
1	183297132	183300132
1	183558132	183561132
1	183561132	183564132
1	183579132	183582132
1	183580632	183583632
1	185526276	185529276
1	185527776	185530776
1	185566776	185569776
1	185568276	185571276
1	187752116	187755116
1	187753616	187756616
1	188299616	188302616
1	188319116	188322116
1	188322116	188325116
1	188323616	188326616
1	188325116	188328116
1	188326616	188329616
1	188445116	188448116
1	188835116	188838116
1	188863616	188866616
1	188865116	188868116
1	188866616	188869616
1	189643616	189646616
1	192430612	192433612
1	192582112	192585112
1	192583612	192586612
1	193870729	193873729
1	194379229	194382229
1	194385229	194388229
1	194386729	194389729
1	194388229	194391229
1	194389729	194392729
1	195057229	195060229
1	195085729	195088729
1	195087229	195090229
1	195088729	195091729
1	195093229	195096229
1	195799729	195802729
1	195801229	195804229
1	195802729	195805729
1	195804229	195807229
1	195819229	195822229
1	195820729	195823729
1	195822229	195825229
1	195823729	195826729
1	195825229	195828229
1	195826729	195829729
1	195834107	195837107
1	195835607	195838607
1	195913607	195916607
1	195915107	195918107
1	196842107	196845107
1	199602126	199605126
1	200692626	200695626
1	201217626	201220626
1	201472626	201475626
1	201943622	201946622
1	201945122	201948122
1	201952622	201955622
1	204283622	204286622
1	204285122	204288122
1	204792122	204795122
1	204904645	204907645
1	204906145	204909145
1	205018645	205021645
1	205374145	205377145
1	205407145	205410145
1	205507645	205510645
1	211703153	211706153
1	211704653	211707653
1	213036653	213039653
1	213051653	213054653
1	214762597	214765597
1	215860597	215863597
1	217587167	217590167
1	220128340	220131340
1	220141840	220144840
1	220495840	220498840
1	220497340	220500340
1	221470840	221473840
1	221472340	221475340
1	221820340	221823340
1	222712840	222715840
1	223638245	223641245
1	223639745	223642745
1	224257745	224260745
1	224259245	224262245
1	224274245	224277245
1	224275745	224278745
1	226635104	226638104
1	226636604	226639604
1	227389604	227392604
1	227502104	227505104
1	228964673	228967673
1	228966173	228969173
1	228967673	228970673
1	229240673	229243673
1	230500673	230503673
1	230502173	230505173
1	230503673	230506673
1	230505173	230508173
1	231729173	231732173
1	232275088	232278088
1	233022088	233025088
1	233488588	233491588
1	233520088	233523088
1	233521588	233524588
1	234130588	234133588
1	234132088	234135088
1	234165088	234168088
1	234406588	234409588
1	234408088	234411088
1	234409588	234412588
1	236383632	236386632
1	236476632	236479632
1	236478132	236481132
1	236518632	236521632
1	236520132	236523132
1	236524632	236527632
1	236526132	236529132
1	236532132	236535132
1	236589132	236592132
1	236698632	236701632
1	236700132	236703132
1	236701632	236704632
1	236706132	236709132
1	236707632	236710632
1	236709132	236712132
1	236745132	236748132
1	237615132	237618132
1	237684132	237687132
1	237739632	237742632
1	237741132	237744132
1	237742632	237745632
1	237982627	237985627
1	238414627	238417627
1	238416127	238419127
1	238471627	238474627
1	238474627	238477627
1	238627627	238630627
1	238629127	238632127
1	238852627	238855627
1	239214127	239217127
1	240178627	240181627
1	240217627	240220627
1	240219127	240222127
1	240220627	240223627
1	240597127	240600127
1	240601627	240604627
1	241291656	241294656
1	241530156	241533156
1	242382156	242385156
1	242404656	242407656
1	245572860	245575860
1	246378360	246381360
1	246379860	246382860
1	246381360	246384360
1	246387360	246390360
1	246388860	246391860
1	246397860	246400860
1	246409860	246412860
1	246415860	246418860
1	246417360	246420360
1	246432360	246435360
1	246666360	246669360
1	246711360	246714360
1	246712860	246715860
1	247615756	247618756
1	247621756	247624756
1	247623256	247626256
1	247624756	247627756
1	247626256	247629256
1	247815256	247818256
1	247945756	247948756
1	247953256	247956256
1	248865256	248868256
2	616056	619056
2	617556	620556
2	1115556	1118556
2	1117056	1120056
2	1138056	1141056
2	1141056	1144056
2	1237056	1240056
2	1238556	1241556
2	1259556	1262556
2	1360056	1363056
2	1361556	1364556
2	1363056	1366056
2	1364556	1367556
2	1367556	1370556
2	1369056	1372056
2	1640556	1643556
2	2606556	2609556
2	4859526	4862526
2	4861026	4864026
2	5972526	5975526
2	6278600	6281600
2	6332600	6335600
2	7630100	7633100
2	8728100	8731100
2	10367577	10370577
2	10669077	10672077
2	10670577	10673577
2	11018577	11021577
2	11834577	11837577
2	12950527	12953527
2	13817527	13820527
2	13819027	13822027
2	15538065	15541065
2	15595065	15598065
2	15596565	15599565
2	15836565	15839565
2	16435065	16438065
2	16661565	16664565
2	17059065	17062065
2	17477565	17480565
2	17978565	17981565
2	17987565	17990565
2	17989065	17992065
2	18262129	18265129
2	18263629	18266629
2	18265129	18268129
2	18269629	18272629
2	18271129	18274129
2	18275629	18278629
2	18277129	18280129
2	18589129	18592129
2	18590629	18593629
2	18592129	18595129
2	18593629	18596629
2	18595129	18598129
2	18596629	18599629
2	18598129	18601129
2	18599629	18602629
2	18604129	18607129
2	18605629	18608629
2	18607129	18610129
2	18658129	18661129
2	18679129	18682129
2	19792129	19795129
2	19916629	19919629
2	28819950	28822950
2	29173950	29176950
2	30116630	30119630
2	30478130	30481130
2	31211630	31214630
2	31270130	31273130
2	31397630	31400630
2	31409630	31412630
2	31411130	31414130
2	31502630	31505630
2	31507130	31510130
2	33403103	33406103
2	33404603	33407603
2	33406103	33409103
2	34139603	34142603
2	34145603	34148603
2	34147103	34150103
2	34184603	34187603
2	35869103	35872103
2	35870603	35873603
2	35875103	35878103
2	35876603	35879603
2	35878103	35881103
2	35879603	35882603
2	35881103	35884103
2	35882603	35885603
2	35884103	35887103
2	35887103	35890103
2	35933603	35936603
2	35935103	35938103
2	35936603	35939603
2	36926529	36929529
2	36928029	36931029
2	38054529	38057529
2	38056029	38059029
2	38057529	38060529
2	38059029	38062029
2	38060529	38063529
2	38062029	38065029
2	38063529	38066529
2	38482029	38485029
2	38686029	38689029
2	40115804	40118804
2	40868804	40871804
2	41939804	41942804
2	41963804	41966804
2	41965304	41968304
2	42241024	42244024
2	42242524	42245524
2	42263524	42266524
2	42304024	42307024
2	45203539	45206539
2	45205039	45208039
2	45206539	45209539
2	45208039	45211039
2	45209539	45212539
2	45211039	45214039
2	46327039	46330039
2	52721523	52724523
2	52753023	52756023
2	52877523	52880523
2	52897023	52900023
2	53053023	53056023
2	53057523	53060523
2	57440596	57443596
2	68029008	68032008
2	68173008	68176008
2	69215524	69218524
2	69224524	69227524
2	69226024	69229024
2	70639024	70642024
2	70943524	70946524
2	71048524	71051524
2	71050024	71053024
2	71051524	71054524
2	71053024	71056024
2	74968147	74971147
2	75559453	75562453
2	76742953	76745953
2	77221453	77224453
2	77480953	77483953
2	77963953	77966953
2	79141061	79144061
2	79225061	79228061
2	79226561	79229561
2	79228061	79231061
2	79229561	79232561
2	79283561	79286561
2	84053636	84056636
2	84055136	84058136
2	84056636	84059636
2	84199136	84202136
2	84200636	84203636
2	84440636	84443636
2	85924136	85927136
2	85925636	85928636
2	88393027	88396027
2	100982511	100985511
2	101083011	101086011
2	101084511	101087511
2	102050575	102053575
2	102052075	102055075
2	102053575	102056575
2	102077575	102080575
2	102178075	102181075
2	102632575	102635575
2	102634075	102637075
2	102967075	102970075
2	106126008	106129008
2	106145508	106148508
2	106607508	106610508
2	106615008	106618008
2	108071594	108074594
2	108313094	108316094
2	109928594	109931594
2	109930094	109933094
2	109931594	109934594
2	109933094	109936094
2	113821921	113824921
2	113833921	113836921
2	113838421	113841421
2	113839921	113842921
2	113842921	113845921
2	114155548	114158548
2	117227545	117230545
2	117229045	117232045
2	117230545	117233545
2	117722545	117725545
2	118402045	118405045
2	118403545	118406545
2	121462074	121465074
2	121796574	121799574
2	121798074	121801074
2	121894074	121897074
2	122054574	122057574
2	125299012	125302012
2	125609512	125612512
2	127685509	127688509
2	129338529	129341529
2	129343029	129346029
2	129344529	129347529
2	129346029	129349029
2	129359529	129362529
2	129505029	129508029
2	133192593	133195593
2	133642593	133645593
2	137648518	137651518
2	137962018	137965018
2	137963518	137966518
2	137966518	137969518
2	137980018	137983018
2	137981518	137984518
2	138451271	138454271
2	142091519	142094519
2	142093019	142096019
2	142096019	142099019
2	142228019	142231019
2	142229519	142232519
2	142231019	142234019
2	142232519	142235519
2	143570519	143573519
2	149198536	149201536
2	150001036	150004036
2	150002536	150005536
2	150005536	150008536
2	150607065	150610065
2	150610065	150613065
2	150611565	150614565
2	150617565	150620565
2	150619065	150622065
2	150620565	150623565
2	150623565	150626565
2	150625065	150628065
2	151871565	151874565
2	151873065	151876065
2	155255642	155258642
2	155615642	155618642
2	158957556	158960556
2	159568139	159571139
2	160870139	160873139
2	165632547	165635547
2	166021047	166024047
2	167449047	167452047
2	168653137	168656137
2	169500637	169503637
2	170295637	170298637
2	172375294	172378294
2	172376794	172379794
2	173044294	173047294
2	173060794	173063794
2	174518501	174521501
2	174520001	174523001
2	178676572	178679572
2	181790533	181793533
2	182992033	182995033
2	182993533	182996533
2	183352449	183355449
2	183353949	183356949
2	183464949	183467949
2	184595949	184598949
2	187693053	187696053
2	187765053	187768053
2	187766553	187769553
2	187768053	187771053
2	187769553	187772553
2	191225517	191228517
2	191227017	191230017
2	192163067	192166067
2	192166067	192169067
2	194371067	194374067
2	194372567	194375567
2	196052553	196055553
2	196058553	196061553
2	196072053	196075053
2	197321553	197324553
2	207536504	207539504
2	207538004	207541004
2	207539504	207542504
2	209065004	209068004
2	212717636	212720636
2	212720636	212723636
2	212722136	212725136
2	213076077	213079077
2	213187077	213190077
2	214139577	214142577
2	214717077	214720077
2	214718577	214721577
2	214720077	214723077
2	214721577	214724577
2	214724577	214727577
2	214732077	214735077
2	214733577	214736577
2	214735077	214738077
2	214736577	214739577
2	215476077	215479077
2	215630577	215633577
2	215908077	215911077
2	218708597	218711597
2	218711597	218714597
2	218782097	218785097
2	218783597	218786597
2	220961536	220964536
2	220963036	220966036
2	221062036	221065036
2	221398036	221401036
2	221399536	221402536
2	221417536	221420536
2	222217115	222220115
2	223105115	223108115
2	223871615	223874615
2	223945115	223948115
2	225968531	225971531
2	226024031	226027031
2	226025531	226028531
2	226034531	226037531
2	226036031	226039031
2	226046531	226049531
2	226048031	226051031
2	226049531	226052531
2	227978531	227981531
2	227980031	227983031
2	228091128	228094128
2	228466128	228469128
2	228490128	228493128
2	228491628	228494628
2	228535128	228538128
2	228536628	228539628
2	228544128	228547128
2	228607128	228610128
2	228994128	228997128
2	230959128	230962128
2	230960628	230963628
2	230996628	230999628
2	231029596	231032596
2	231242596	231245596
2	231244096	231247096
2	231421096	231424096
2	231425596	231428596
2	231427096	231430096
2	231437596	231440596
2	231878596	231881596
2	233426596	233429596
2	233428096	233431096
2	233930596	233933596
2	234059233	234062233
2	234062233	234065233
2	234063733	234066733
2	234065233	234068233
2	235193233	235196233
2	235508233	235511233
2	235668733	235671733
2	235670233	235673233
2	235802233	235805233
2	235803733	235806733
2	236612233	236615233
2	237154278	237157278
2	237155778	237158778
2	237566778	237569778
2	237763278	237766278
2	237764778	237767778
2	237767778	237770778
2	237808278	237811278
2	238048278	238051278
2	238052778	238055778
2	238054278	238057278
2	238211778	238214778
2	238219278	238222278
2	238495278	238498278
2	238537278	238540278
2	239006778	239009778
2	239488278	239491278
2	239489778	239492778
2	241018012	241021012
2	241019512	241022512
2	241118512	241121512
2	241120012	241123012
2	241123012	241126012
2	241199512	241202512
2	241829512	241832512
2	242048512	242051512
3	668178	671178
3	729678	732678
3	1514178	1517178
3	1637178	1640178
3	1848678	1851678
3	1931178	1934178
3	1932678	1935678
3	2960178	2963178
3	3750565	3753565
3	3767065	3770065
3	3768565	3771565
3	3780565	3783565
3	3782065	3785065
3	4013065	4016065
3	4901065	4904065
3	5714065	5717065
3	6318513	6321513
3	6501513	6504513
3	7923513	7926513
3	7974513	7977513
3	7983513	7986513
3	7985013	7988013
3	10784211	10787211
3	11034711	11037711
3	12486508	12489508
3	13109008	13112008
3	13110508	13113508
3	13130008	13133008
3	13193008	13196008
3	13257508	13260508
3	13473508	13476508
3	13475008	13478008
3	13476508	13479508
3	13478008	13481008
3	14126008	14129008
3	14328508	14331508
3	16184010	16187010
3	16358010	16361010
3	20505570	20508570
3	20570070	20573070
3	20768070	20771070
3	21485214	21488214
3	21987714	21990714
3	21989214	21992214
3	21998214	22001214
3	21999714	22002714
3	22560714	22563714
3	22562214	22565214
3	22941714	22944714
3	22950714	22953714
3	23973714	23976714
3	23975214	23978214
3	26502543	26505543
3	26504043	26507043
3	27101041	27104041
3	29739541	29742541
3	29750041	29753041
3	30251036	30254036
3	30903536	30906536
3	31167536	31170536
3	31775036	31778036
3	32207036	32210036
3	32663036	32666036
3	32664536	32667536
3	32666036	32669036
3	32667536	32670536
3	32669036	32672036
3	34719529	34722529
3	34721029	34724029
3	39288511	39291511
3	39290011	39293011
3	39531511	39534511
3	39537511	39540511
3	39539011	39542011
3	39540511	39543511
3	39951511	39954511
3	39954511	39957511
3	39974011	39977011
3	40095511	40098511
3	40097011	40100011
3	40103011	40106011
3	41049511	41052511
3	41370511	41373511
3	41373511	41376511
3	41583511	41586511
3	41585011	41588011
3	41586511	41589511
3	41588011	41591011
3	41594011	41597011
3	41595511	41598511
3	41597011	41600011
3	41598511	41601511
3	41862511	41865511
3	41864011	41867011
3	42366587	42369587
3	42369587	42372587
3	42371087	42374087
3	46667019	46670019
3	46778019	46781019
3	61049022	61052022
3	61050522	61053522
3	62712522	62715522
3	62723022	62726022
3	62724522	62727522
3	63273562	63276562
3	64100062	64103062
3	64920562	64923562
3	64922062	64925062
3	64974562	64977562
3	67655062	67658062
3	67656562	67659562
3	67658062	67661062
3	67659562	67662562
3	69410369	69413369
3	69411869	69414869
3	69413369	69416369
3	69414869	69417869
3	69416369	69419369
3	69581369	69584369
3	73365563	73368563
3	73367063	73370063
3	73368563	73371563
3	73376063	73379063
3	73377563	73380563
3	74772563	74775563
3	75599072	75602072
3	75600572	75603572
3	75602072	75605072
3	75603572	75606572
3	75605072	75608072
3	75606572	75609572
3	75759572	75762572
3	76983572	76986572
3	76985072	76988072
3	77601572	77604572
3	77603072	77606072
3	79958044	79961044
3	82005069	82008069
3	84410418	84413418
3	84507918	84510918
3	84509418	84512418
3	84510918	84513918
3	85574418	85577418
3	85583418	85586418
3	87344059	87347059
3	87345559	87348559
3	87357559	87360559
3	87374059	87377059
3	87375559	87378559
3	87377059	87380059
3	87384559	87387559
3	87398059	87401059
3	87399559	87402559
3	87401059	87404059
3	87402559	87405559
3	87612559	87615559
3	88577059	88580059
3	95146955	95149955
3	95148455	95151455
3	95149955	95152955
3	95151455	95154455
3	95152955	95155955
3	95154455	95157455
3	95155955	95158955
3	95158955	95161955
3	95163455	95166455
3	95164955	95167955
3	95166455	95169455
3	95167955	95170955
3	95169455	95172455
3	95170955	95173955
3	95172455	95175455
3	95173955	95176955
3	95175455	95178455
3	95178455	95181455
3	95179955	95182955
3	95182955	95185955
3	95656955	95659955
3	95659955	95662955
3	95661455	95664455
3	95664455	95667455
3	95665955	95668955
3	95667455	95670455
3	95668955	95671955
3	95670455	95673455
3	96818065	96821065
3	96819565	96822565
3	97788565	97791565
3	97790065	97793065
3	97793065	97796065
3	97799065	97802065
3	97919065	97922065
3	97920565	97923565
3	97940065	97943065
3	97941565	97944565
3	97943065	97946065
3	97944565	97947565
3	97946065	97949065
3	97983565	97986565
3	98027065	98030065
3	98028565	98031565
3	98742565	98745565
3	98744065	98747065
3	100833504	100836504
3	103343165	103346165
3	103350665	103353665
3	103352165	103355165
3	103395665	103398665
3	103466165	103469165
3	103467665	103470665
3	103748165	103751165
3	103937165	103940165
3	103938665	103941665
3	103940165	103943165
3	103941665	103944665
3	103946165	103949165
3	104417165	104420165
3	104418665	104421665
3	104420165	104423165
3	104666165	104669165
3	105693083	105696083
3	105694583	105697583
3	105696083	105699083
3	105697583	105700583
3	106011083	106014083
3	106014083	106017083
3	106030583	106033583
3	106032083	106035083
3	106383083	106386083
3	108566109	108569109
3	109035609	109038609
3	109653609	109656609
3	109655109	109658109
3	109985109	109988109
3	110154609	110157609
3	111038109	111041109
3	111926192	111929192
3	111927692	111930692
3	111956192	111959192
3	111957692	111960692
3	111971192	111974192
3	112844192	112847192
3	115526090	115529090
3	115683590	115686590
3	115685090	115688090
3	116324090	116327090
3	116801090	116804090
3	116802590	116805590
3	121639623	121642623
3	121641123	121644123
3	121642623	121645623
3	122299623	122302623
3	122301123	122304123
3	122302623	122305623
3	123097623	123100623
3	123101070	123104070
3	123102570	123105570
3	123104070	123107070
3	124290570	124293570
3	124298070	124301070
3	124305570	124308570
3	124320570	124323570
3	124322070	124325070
3	124338570	124341570
3	124340070	124343070
3	125844570	125847570
3	125846070	125849070
3	125847570	125850570
3	125849070	125852070
3	125858070	125861070
3	125943570	125946570
3	125945070	125948070
3	125946570	125949570
3	125948070	125951070
3	125949570	125952570
3	125951070	125954070
3	125952570	125955570
3	126020070	126023070
3	126393520	126396520
3	129062020	129065020
3	129063520	129066520
3	129659189	129662189
3	129666689	129669689
3	129677189	129680189
3	131078189	131081189
3	131079689	131082689
3	131267189	131270189
3	131384189	131387189
3	131595689	131598689
3	131597189	131600189
3	131598689	131601689
3	131645189	131648189
3	131646689	131649689
3	131673689	131676689
3	131675189	131678189
3	131676689	131679689
3	131726189	131729189
3	131937689	131940689
3	132509660	132512660
3	132685160	132688160
3	133409660	133412660
3	134152160	134155160
3	134153660	134156660
3	136755743	136758743
3	140903086	140906086
3	140909086	140912086
3	143420002	143423002
3	143421502	143424502
3	144614037	144617037
3	145233537	145236537
3	145238037	145241037
3	145239537	145242537
3	145698537	145701537
3	145700037	145703037
3	145701537	145704537
3	145740537	145743537
3	145743537	145746537
3	145979037	145982037
3	145983537	145986537
3	147827172	147830172
3	148005672	148008672
3	148622172	148625172
3	149388672	149391672
3	149397672	149400672
3	149880672	149883672
3	151925034	151928034
3	151926534	151929534
3	151928034	151931034
3	152240034	152243034
3	153729623	153732623
3	153731123	153734123
3	153735623	153738623
3	153740123	153743123
3	154274123	154277123
3	154275623	154278623
3	154277123	154280123
3	154286123	154289123
3	154287623	154290623
3	154290623	154293623
3	157458514	157461514
3	158612014	158615014
3	158613514	158616514
3	161099199	161102199
3	161157699	161160699
3	161778699	161781699
3	161810199	161813199
3	161811699	161814699
3	161813199	161816199
3	161814699	161817699
3	162237992	162240992
3	162605492	162608492
3	162608492	162611492
3	162630992	162633992
3	162635492	162638492
3	162639992	162642992
3	162641492	162644492
3	162722492	162725492
3	162728492	162731492
3	162731492	162734492
3	162732992	162735992
3	162869492	162872492
3	163731992	163734992
3	164118992	164121992
3	164180492	164183492
3	164181992	164184992
3	165452076	165455076
3	165456576	165459576
3	165458076	165461076
3	165462576	165465576
3	165848076	165851076
3	165849576	165852576
3	165851076	165854076
3	165852576	165855576
3	165854076	165857076
3	165968076	165971076
3	166037076	166040076
3	170384431	170387431
3	170385931	170388931
3	171194038	171197038
3	171440038	171443038
3	171801538	171804538
3	172221538	172224538
3	172254538	172257538
3	172658038	172661038
3	172659538	172662538
3	172661038	172664038
3	172662538	172665538
3	172664038	172667038
3	173876038	173879038
3	174483616	174486616
3	176513116	176516116
3	176514616	176517616
3	176516116	176519116
3	176597116	176600116
3	176598616	176601616
3	177294542	177297542
3	177296042	177299042
3	177297542	177300542
3	177299042	177302042
3	177305042	177308042
3	177461042	177464042
3	178982042	178985042
3	183051570	183054570
3	183068070	183071070
3	183179306	183182306
3	183180806	183183806
3	183360806	183363806
3	183378806	183381806
3	184127306	184130306
3	184406306	184409306
3	184766306	184769306
3	184767806	184770806
3	186434163	186437163
3	186435663	186438663
3	186437163	186440163
3	186438663	186441663
3	186440163	186443163
3	186777663	186780663
3	186779163	186782163
3	189246505	189249505
3	189873505	189876505
3	189875005	189878005
3	190053505	190056505
3	190055005	190058005
3	190059505	190062505
3	190511005	190514005
3	190512505	190515505
3	190514005	190517005
3	190515505	190518505
3	190517005	190520005
3	190775005	190778005
3	190890505	190893505
3	190892005	190895005
3	191180005	191183005
3	191300005	191303005
3	191360005	191363005
3	191361505	191364505
3	192449112	192452112
3	192450612	192453612
3	192452112	192455112
3	192737112	192740112
3	192822612	192825612
3	193944612	193947612
3	193946112	193949112
3	194265612	194268612
3	194316612	194319612
3	194667612	194670612
3	194669112	194672112
3	194670612	194673612
3	197144109	197147109
4	512428	515428
4	534928	537928
4	536428	539428
4	537928	540928
4	539428	542428
4	782428	785428
4	1286428	1289428
4	1289428	1292428
4	1290928	1293928
4	1293928	1296928
4	1295428	1298428
4	2174428	2177428
4	2175928	2178928
4	2177428	2180428
4	2178928	2181928
4	2180428	2183428
4	2181928	2184928
4	2183428	2186428
4	2184928	2187928
4	2186428	2189428
4	2192428	2195428
4	2369428	2372428
4	2373928	2376928
4	2375428	2378428
4	3793634	3796634
4	3795134	3798134
4	3796634	3799634
4	3801134	3804134
4	3877634	3880634
4	4243634	4246634
4	4284134	4287134
4	4296134	4299134
4	4348634	4351634
4	4687634	4690634
4	4849634	4852634
4	5310134	5313134
4	5311634	5314634
4	5313134	5316134
4	5314634	5317634
4	5316134	5319134
4	5616134	5619134
4	5617634	5620634
4	5965634	5968634
4	7215081	7218081
4	7318581	7321581
4	7320081	7323081
4	7498581	7501581
4	9951518	9954518
4	9953018	9956018
4	9956018	9959018
4	9957518	9960518
4	9963518	9966518
4	11451518	11454518
4	11453018	11456018
4	11948018	11951018
4	12090048	12093048
4	12238548	12241548
4	12546048	12549048
4	12547548	12550548
4	12549048	12552048
4	14872548	14875548
4	16417590	16420590
4	17307090	17310090
4	17308590	17311590
4	17691090	17694090
4	17695590	17698590
4	18750220	18753220
4	21114144	21117144
4	21489144	21492144
4	21732144	21735144
4	21766644	21769644
4	21768144	21771144
4	21769644	21772644
4	21790644	21793644
4	21792144	21795144
4	23292144	23295144
4	23602644	23605644
4	24955621	24958621
4	24958621	24961621
4	25000621	25003621
4	27780106	27783106
4	28917106	28920106
4	28918606	28921606
4	28981606	28984606
4	29469106	29472106
4	31437494	31440494
4	31438994	31441994
4	31588994	31591994
4	31590494	31593494
4	31591994	31594994
4	32199494	32202494
4	32251994	32254994
4	32253494	32256494
4	32254994	32257994
4	32337494	32340494
4	32574494	32577494
4	32575994	32578994
4	32643494	32646494
4	32656994	32659994
4	32658494	32661494
4	32989994	32992994
4	32991494	32994494
4	33288119	33291119
4	33729119	33732119
4	33730619	33733619
4	34753619	34756619
4	34758119	34761119
4	34761119	34764119
4	34762619	34765619
4	35514119	35517119
4	35515619	35518619
4	35604119	35607119
4	35607119	35610119
4	35608619	35611619
4	35610119	35613119
4	35695619	35698619
4	36622539	36625539
4	36624039	36627039
4	36625539	36628539
4	36627039	36630039
4	36628539	36631539
4	36630039	36633039
4	36631539	36634539
4	37512039	37515039
4	37518039	37521039
4	37524039	37527039
4	37561539	37564539
4	37786539	37789539
4	37807539	37810539
4	38187039	38190039
4	38194539	38197539
4	38196039	38199039
4	38212539	38215539
4	38784039	38787039
4	38785539	38788539
4	38875539	38878539
4	38877039	38880039
4	39108044	39111044
4	39109544	39112544
4	39114044	39117044
4	39117044	39120044
4	39118544	39121544
4	39120044	39123044
4	41203544	41206544
4	41322044	41325044
4	41590544	41593544
4	41592044	41595044
4	42178963	42181963
4	42183463	42186463
4	42738463	42741463
4	42739963	42742963
4	42741463	42744463
4	42748963	42751963
4	42754963	42757963
4	43150963	43153963
4	44661463	44664463
4	44662963	44665963
4	44959963	44962963
4	46749928	46752928
4	47547928	47550928
4	47624428	47627428
4	47625928	47628928
4	48174046	48177046
4	48175546	48178546
4	54472649	54475649
4	56023649	56026649
4	56025149	56028149
4	56026649	56029649
4	56038649	56041649
4	56142149	56145149
4	57124631	57127631
4	57127631	57130631
4	57523631	57526631
4	57697631	57700631
4	57916631	57919631
4	57918131	57921131
4	57919631	57922631
4	58159631	58162631
4	58161131	58164131
4	58164131	58167131
4	58168631	58171631
4	58192631	58195631
4	58567631	58570631
4	58569131	58572131
4	58570631	58573631
4	58719131	58722131
4	58720631	58723631
4	58960631	58963631
4	58977131	58980131
4	59355131	59358131
4	59608631	59611631
4	59812631	59815631
4	60426156	60429156
4	60840156	60843156
4	61281156	61284156
4	61282656	61285656
4	61284156	61287156
4	61365156	61368156
4	61368156	61371156
4	61369656	61372656
4	61399656	61402656
4	62032656	62035656
4	63648059	63651059
4	63651059	63654059
4	63652559	63655559
4	63654059	63657059
4	64534559	64537559
4	64536059	64539059
4	64849559	64852559
4	64851059	64854059
4	65538059	65541059
4	65541059	65544059
4	66751575	66754575
4	66753075	66756075
4	66754575	66757575
4	66993075	66996075
4	68914575	68917575
4	68916075	68919075
4	69347015	69350015
4	69348515	69351515
4	69350015	69353015
4	69593015	69596015
4	69608015	69611015
4	69609515	69612515
4	69614015	69617015
4	70386515	70389515
4	70388015	70391015
4	70389515	70392515
4	70391015	70394015
4	70392515	70395515
4	70395515	70398515
4	70401515	70404515
4	70403015	70406015
4	70413515	70416515
4	70415015	70418015
4	70418015	70421015
4	70419515	70422515
4	70422515	70425515
4	70427015	70430015
4	70428515	70431515
4	70487015	70490015
4	71208515	71211515
4	71210015	71213015
4	71211515	71214515
4	71213015	71216015
4	71214515	71217515
4	71250515	71253515
4	71385515	71388515
4	72907902	72910902
4	73419402	73422402
4	73444902	73447902
4	73446402	73449402
4	73447902	73450902
4	73491402	73494402
4	73492902	73495902
4	73494402	73497402
4	73630902	73633902
4	74451402	74454402
4	74452902	74455902
4	75199613	75202613
4	75207113	75210113
4	75208613	75211613
4	75213113	75216113
4	75769613	75772613
4	76192613	76195613
4	76194113	76197113
4	76302113	76305113
4	76951613	76954613
4	76953113	76956113
4	76954613	76957613
4	76971113	76974113
4	76972613	76975613
4	76989113	76992113
4	76990613	76993613
4	76993613	76996613
4	77094113	77097113
4	77299613	77302613
4	77454113	77457113
4	77910113	77913113
4	77913113	77916113
4	77914613	77917613
4	78223699	78226699
4	78231199	78234199
4	78232699	78235699
4	78234199	78237199
4	78244699	78247699
4	78249199	78252199
4	78258199	78261199
4	78262699	78265699
4	78264199	78267199
4	78291199	78294199
4	78303199	78306199
4	78346699	78349699
4	78348199	78351199
4	78987199	78990199
4	78988699	78991699
4	79260199	79263199
4	79281199	79284199
4	79282699	79285699
4	79285699	79288699
4	79419199	79422199
4	79429699	79432699
4	79452199	79455199
4	79453699	79456699
4	80808199	80811199
4	83554615	83557615
4	83659615	83662615
4	84141083	84144083
4	84142583	84145583
4	84144083	84147083
4	84159083	84162083
4	84160583	84163583
4	84169583	84172583
4	84171083	84174083
4	84790583	84793583
4	84825083	84828083
4	84826583	84829583
4	84943583	84946583
4	84945083	84948083
4	86034083	86037083
4	86037083	86040083
4	86103083	86106083
4	86460083	86463083
4	86461583	86464583
4	86464583	86467583
4	86472083	86475083
4	86473583	86476583
4	86475083	86478083
4	86476583	86479583
4	86478083	86481083
4	86479583	86482583
4	86571083	86574083
4	86572583	86575583
4	88444825	88447825
4	88669825	88672825
4	88671325	88674325
4	88783825	88786825
4	88786825	88789825
4	90165093	90168093
4	90166593	90169593
4	90591093	90594093
4	91714593	91717593
4	92278593	92281593
4	92280093	92283093
4	93502578	93505578
4	93504078	93507078
4	94216578	94219578
4	94803078	94806078
4	96699179	96702179
4	96700679	96703679
4	96702179	96705179
4	96703679	96706679
4	96745679	96748679
4	96756179	96759179
4	97423679	97426679
4	97425179	97428179
4	97426679	97429679
4	97428179	97431179
4	97431179	97434179
4	97432679	97435679
4	97434179	97437179
4	99019643	99022643
4	99037643	99040643
4	99786143	99789143
4	100263143	100266143
4	100291643	100294643
4	100293143	100296143
4	100294643	100297643
4	100299143	100302143
4	100300643	100303643
4	101479643	101482643
4	103551143	103554143
4	103552643	103555643
4	103554143	103557143
4	104466143	104469143
4	110134656	110137656
4	110139156	110142156
4	110151156	110154156
4	110152656	110155656
4	111126166	111129166
4	112762666	112765666
4	114018073	114021073
4	114019573	114022573
4	115014073	115017073
4	115140073	115143073
4	115144573	115147573
4	115146073	115149073
4	115411573	115414573
4	115413073	115416073
4	115414573	115417573
4	115416073	115419073
4	115431073	115434073
4	115452073	115455073
4	116172073	116175073
4	116376073	116379073
4	116389573	116392573
4	116391073	116394073
4	116406073	116409073
4	116415073	116418073
4	116449573	116452573
4	116451073	116454073
4	116452573	116455573
4	116506573	116509573
4	117502604	117505604
4	118651604	118654604
4	120043616	120046616
4	120045116	120048116
4	120046616	120049616
4	120048116	120051116
4	120235616	120238616
4	120237116	120240116
4	120238616	120241616
4	120240116	120243116
4	122512616	122515616
4	122662616	122665616
4	122664116	122667116
4	122956616	122959616
4	127059044	127062044
4	127063544	127066544
4	129592162	129595162
4	129593662	129596662
4	130072162	130075162
4	131252662	131255662
4	131254162	131257162
4	131596162	131599162
4	131614162	131617162
4	131845162	131848162
4	133032069	133035069
4	133644069	133647069
4	133764069	133767069
4	133765569	133768569
4	133849569	133852569
4	133851069	133854069
4	137403046	137406046
4	137941546	137944546
4	137952046	137955046
4	138364562	138367562
4	138366062	138369062
4	139569062	139572062
4	142665113	142668113
4	142962113	142965113
4	143892113	143895113
4	143938613	143941613
4	144655655	144658655
4	144657155	144660155
4	144658655	144661655
4	145195655	145198655
4	145197155	145200155
4	147943573	147946573
4	147945073	147948073
4	148023073	148026073
4	153906150	153909150
4	153907650	153910650
4	153909150	153912150
4	154746150	154749150
4	154951650	154954650
4	155359650	155362650
4	155404650	155407650
4	155406150	155409150
4	155766150	155769150
4	155775150	155778150
4	155802150	155805150
4	156097572	156100572
4	156099072	156102072
4	156100572	156103572
4	156108072	156111072
4	156109572	156112572
4	157363572	157366572
4	157980072	157983072
4	158442072	158445072
4	158443572	158446572
4	158445072	158448072
4	158640072	158643072
4	159330943	159333943
4	159333943	159336943
4	159342943	159345943
4	159350443	159353443
4	159359443	159362443
4	159360943	159363943
4	159369943	159372943
4	159371443	159374443
4	159377443	159380443
4	160661443	160664443
4	160664443	160667443
4	161472943	161475943
4	161682943	161685943
4	162028665	162031665
4	162030165	162033165
4	162223665	162226665
4	162225165	162228165
4	162226665	162229665
4	162231165	162234165
4	162235665	162238665
4	163264665	163267665
4	163266165	163269165
4	163807665	163810665
4	164301165	164304165
4	165087051	165090051
4	165090051	165093051
4	165091551	165094551
4	165711051	165714051
4	165712551	165715551
4	166084551	166087551
4	166086051	166089051
4	166263051	166266051
4	166336551	166339551
4	166338051	166341051
4	166344051	166347051
4	166345551	166348551
4	166347051	166350051
4	166348551	166351551
4	166350051	166353051
4	166452051	166455051
4	166528551	166531551
4	166530051	166533051
4	167199051	167202051
4	167464551	167467551
4	168262589	168265589
4	171594079	171597079
4	171595579	171598579
4	171889579	171892579
4	172132579	172135579
4	172875079	172878079
4	173658079	173661079
4	174883542	174886542
4	175024542	175027542
4	175656042	175659042
4	175776042	175779042
4	175777542	175780542
4	175873542	175876542
4	175875042	175878042
4	176994042	176997042
4	177231092	177234092
4	177232592	177235592
4	177438092	177441092
4	177612092	177615092
4	177870092	177873092
4	178653092	178656092
4	178654592	178657592
4	178656092	178659092
4	178657592	178660592
4	178659092	178662092
4	179016092	179019092
4	179442092	179445092
4	180061628	180064628
4	180063128	180066128
4	180066128	180069128
4	180067628	180070628
4	180069128	180072128
4	180258128	180261128
4	180409628	180412628
4	180502628	180505628
4	180504128	180507128
4	181437128	181440128
4	181468628	181471628
4	181470128	181473128
4	181471628	181474628
4	183246059	183249059
4	183247559	183250559
4	183352559	183355559
4	183808559	183811559
4	184291559	184294559
4	184354559	184357559
4	184356059	184359059
4	184362059	184365059
4	185637059	185640059
4	185638559	185641559
4	185646059	185649059
4	185748059	185751059
4	185749559	185752559
4	187369611	187372611
4	187372611	187375611
4	188608611	188611611
4	188616111	188619111
4	189241953	189244953
4	189243453	189246453
4	189295953	189298953
4	189414453	189417453
4	189505953	189508953
4	189583953	189586953
4	189585453	189588453
4	189586953	189589953
4	189589953	189592953
4	189591453	189594453
4	189834453	189837453
4	189852453	189855453
4	189853953	189856953
4	190008453	190011453
4	190009953	190012953
4	190294953	190297953
4	190297953	190300953
4	190299453	190302453
4	190300953	190303953
4	190311453	190314453
5	2782566	2785566
5	2938566	2941566
5	2940066	2943066
5	3013469	3016469
5	3047969	3050969
5	3206969	3209969
5	3548969	3551969
5	3634469	3637469
5	3635969	3638969
5	3637469	3640469
5	4022969	4025969
5	4024469	4027469
5	5140469	5143469
5	5299469	5302469
5	5300969	5303969
5	5735969	5738969
5	6146881	6149881
5	6152881	6155881
5	6209881	6212881
5	6211381	6214381
5	6487381	6490381
5	7190881	7193881
5	7192381	7195381
5	7559881	7562881
5	7963381	7966381
5	8015881	8018881
5	8017381	8020381
5	8018881	8021881
5	8021881	8024881
5	8105881	8108881
5	8524381	8527381
5	8525881	8528881
5	8531881	8534881
5	8533381	8536381
5	8726881	8729881
5	8737381	8740381
5	8738881	8741881
5	8830381	8833381
5	9988569	9991569
5	10116069	10119069
5	10630569	10633569
5	13264423	13267423
5	13265923	13268923
5	13604923	13607923
5	13832923	13835923
5	13910923	13913923
5	13912423	13915423
5	14743423	14746423
5	14744923	14747923
5	15332893	15335893
5	15959893	15962893
5	16924393	16927393
5	16925893	16928893
5	18425957	18428957
5	19370957	19373957
5	19372457	19375457
5	20542457	20545457
5	20543957	20546957
5	22471588	22474588
5	23733088	23736088
5	24113918	24116918
5	24127418	24130418
5	24517418	24520418
5	25571918	25574918
5	25573418	25576418
5	25981418	25984418
5	25982918	25985918
5	26587418	26590418
5	26599418	26602418
5	26600918	26603918
5	26783918	26786918
5	26813918	26816918
5	26815418	26818418
5	26947418	26950418
5	28331932	28334932
5	29254432	29257432
5	29255932	29258932
5	29464432	29467432
5	29690932	29693932
5	29692432	29695432
5	29803432	29806432
5	30085436	30088436
5	30400436	30403436
5	30401936	30404936
5	31337936	31340936
5	31339436	31342436
5	31351436	31354436
5	31694936	31697936
5	31696436	31699436
5	32846936	32849936
5	33599913	33602913
5	33604413	33607413
5	33605913	33608913
5	33814413	33817413
5	34424913	34427913
5	34426413	34429413
5	34427913	34430913
5	34454913	34457913
5	34456413	34459413
5	34459413	34462413
5	34460913	34463913
5	34466913	34469913
5	34468413	34471413
5	34469913	34472913
5	34624413	34627413
5	35134413	35137413
5	35699913	35702913
5	35701413	35704413
5	35702913	35705913
5	35704413	35707413
5	35705913	35708913
5	35707413	35710413
5	35710413	35713413
5	35711913	35714913
5	35714913	35717913
5	35716413	35719413
5	36368937	36371937
5	36601437	36604437
5	36602937	36605937
5	38035437	38038437
5	39240212	39243212
5	39247712	39250712
5	39426212	39429212
5	41598212	41601212
5	41599712	41602712
5	41601212	41604212
5	41602712	41605712
5	41604212	41607212
5	41610212	41613212
5	41611712	41614712
5	41616212	41619212
5	51794889	51797889
5	52247889	52250889
5	52420389	52423389
5	53297889	53300889
5	53299389	53302389
5	53704389	53707389
5	53711889	53714889
5	53713389	53716389
5	53851389	53854389
5	53852889	53855889
5	54953945	54956945
5	54955445	54958445
5	54967445	54970445
5	54991445	54994445
5	54992945	54995945
5	55508945	55511945
5	55658945	55661945
5	55660445	55663445
5	58078739	58081739
5	65818575	65821575
5	66159122	66162122
5	66502622	66505622
5	66945122	66948122
5	67099622	67102622
5	67102622	67105622
5	68352122	68355122
5	68353622	68356622
5	71840088	71843088
5	71841588	71844588
5	72445418	72448418
5	72812918	72815918
[truncated: 4,226 more rows]

## Sheet: SIGNIF_tf0.5_YRI
1	4392120	4395120
1	4459620	4462620
1	4597620	4600620
1	5328120	5331120
1	8158702	8161702
1	9093202	9096202
1	9271702	9274702
1	14424088	14427088
1	14425588	14428588
1	14457088	14460088
1	14460088	14463088
1	15282088	15285088
1	15456088	15459088
1	15457588	15460588
1	15459088	15462088
1	16374105	16377105
1	17400105	17403105
1	17401605	17404605
1	17421105	17424105
1	17422605	17425605
1	17649105	17652105
1	17716605	17719605
1	17718105	17721105
1	17719605	17722605
1	18123105	18126105
1	18829605	18832605
1	19200124	19203124
1	19936624	19939624
1	20017624	20020624
1	20943124	20946124
1	22306608	22309608
1	24207108	24210108
1	24376608	24379608
1	24705108	24708108
1	24927282	24930282
1	24928782	24931782
1	24930282	24933282
1	24931782	24934782
1	24933282	24936282
1	24934782	24937782
1	25180782	25183782
1	25182282	25185282
1	25299282	25302282
1	26428782	26431782
1	29802214	29805214
1	30369214	30372214
1	30696214	30699214
1	30738214	30741214
1	30990085	30993085
1	30991585	30994585
1	31063585	31066585
1	31074085	31077085
1	31075585	31078585
1	31671085	31674085
1	34039916	34042916
1	34599416	34602416
1	34654916	34657916
1	34656416	34659416
1	37878337	37881337
1	40153593	40156593
1	46811271	46814271
1	46815771	46818771
1	46817271	46820271
1	49176441	49179441
1	53487261	53490261
1	53488761	53491761
1	53500761	53503761
1	54156261	54159261
1	55192612	55195612
1	55416112	55419112
1	57067612	57070612
1	57444112	57447112
1	57445612	57448612
1	59019253	59022253
1	59020753	59023753
1	59464753	59467753
1	59466253	59469253
1	59467753	59470753
1	64156935	64159935
1	64659435	64662435
1	64660935	64663935
1	64771935	64774935
1	65838435	65841435
1	66126435	66129435
1	66127935	66130935
1	66130935	66133935
1	66132435	66135435
1	66133935	66136935
1	66141435	66144435
1	66156435	66159435
1	68871088	68874088
1	68872588	68875588
1	70582095	70585095
1	71011095	71014095
1	71012595	71015595
1	73851108	73854108
1	77104933	77107933
1	77106433	77109433
1	77107933	77110933
1	77109433	77112433
1	77110933	77113933
1	77112433	77115433
1	77209933	77212933
1	78631933	78634933
1	78633433	78636433
1	80847101	80850101
1	81400601	81403601
1	81402101	81405101
1	81955670	81958670
1	81957170	81960170
1	83143670	83146670
1	83145170	83148170
1	83146670	83149670
1	83163170	83166170
1	83164670	83167670
1	83166170	83169170
1	86457087	86460087
1	86469087	86472087
1	86470587	86473587
1	86473587	86476587
1	86475087	86478087
1	86476587	86479587
1	86481087	86484087
1	89382150	89385150
1	89458650	89461650
1	91641143	91644143
1	91642643	91645643
1	91644143	91647143
1	91653143	91656143
1	92095643	92098643
1	92391143	92394143
1	93520643	93523643
1	94212150	94215150
1	94228650	94231650
1	94230150	94233150
1	94239150	94242150
1	94240650	94243650
1	94245150	94248150
1	94246650	94249650
1	94248150	94251150
1	94264650	94267650
1	94266150	94269150
1	94440150	94443150
1	94443150	94446150
1	94444650	94447650
1	94461150	94464150
1	94465650	94468650
1	94467150	94470150
1	95133150	95136150
1	95148150	95151150
1	95149650	95152650
1	95151150	95154150
1	95193150	95196150
1	99192209	99195209
1	100149083	100152083
1	100150583	100153583
1	101031083	101034083
1	101032583	101035583
1	101034083	101037083
1	101850083	101853083
1	102069083	102072083
1	102084083	102087083
1	102085583	102088583
1	102234083	102237083
1	102235583	102238583
1	102378083	102381083
1	102381083	102384083
1	102828083	102831083
1	102829583	102832583
1	102834085	102837085
1	102861085	102864085
1	103594585	103597585
1	103612585	103615585
1	103614085	103617085
1	103615585	103618585
1	104628085	104631085
1	105234085	105237085
1	105499585	105502585
1	105501085	105504085
1	105505585	105508585
1	105507085	105510085
1	106105068	106108068
1	106109568	106112568
1	106115568	106118568
1	106720068	106723068
1	108500568	108503568
1	108562068	108565068
1	108565068	108568068
1	108566568	108569568
1	109366525	109369525
1	109368025	109371025
1	110814025	110817025
1	111574525	111577525
1	111580525	111583525
1	111582025	111585025
1	111795025	111798025
1	111829525	111832525
1	111906306	111909306
1	112704306	112707306
1	114526806	114529806
1	116089603	116092603
1	116283103	116286103
1	116310103	116313103
1	116329603	116332603
1	116730103	116733103
1	116731603	116734603
1	116733103	116736103
1	116734603	116737603
1	116736103	116739103
1	116737603	116740603
1	117460603	117463603
1	117472603	117475603
1	117474103	117477103
1	117475603	117478603
1	117477103	117480103
1	117871592	117874592
1	118354592	118357592
1	120084092	120087092
1	120085592	120088592
1	120331592	120334592
1	120333092	120336092
1	152691210	152694210
1	152692710	152695710
1	152964210	152967210
1	152970210	152973210
1	152971710	152974710
1	152973210	152976210
1	152980710	152983710
1	152982210	152985210
1	152983710	152986710
1	153001710	153004710
1	153003210	153006210
1	153004710	153007710
1	153006210	153009210
1	153132210	153135210
1	153133710	153136710
1	153319710	153322710
1	153321210	153324210
1	157129769	157132769
1	157131269	157134269
1	157195769	157198769
1	157204769	157207769
1	157596269	157599269
1	157597769	157600769
1	158344769	158347769
1	158350769	158353769
1	158377769	158380769
1	158463269	158466269
1	158490269	158493269
1	158496269	158499269
1	158497769	158500769
1	158503769	158506769
1	158505269	158508269
1	158713769	158716769
1	158722769	158725769
1	158733269	158736269
1	158839769	158842769
1	158841269	158844269
1	159460769	159463769
1	160146091	160149091
1	160854091	160857091
1	162028591	162031591
1	162030091	162033091
1	165895617	165898617
1	167524617	167527617
1	167526117	167529117
1	170832093	170835093
1	171168093	171171093
1	171652593	171655593
1	172449091	172452091
1	175057672	175060672
1	175059172	175062172
1	179449820	179452820
1	179451320	179454320
1	181158132	181161132
1	181159632	181162632
1	181182132	181185132
1	181183632	181186632
1	181185132	181188132
1	183114132	183117132
1	183154632	183157632
1	183156132	183159132
1	183159132	183162132
1	183160632	183163632
1	183297132	183300132
1	183558132	183561132
1	183561132	183564132
1	183579132	183582132
1	183592632	183595632
1	183597132	183600132
1	185526276	185529276
1	185527776	185530776
1	187752116	187755116
1	187753616	187756616
1	188251616	188254616
1	188320616	188323616
1	188322116	188325116
1	188323616	188326616
1	188325116	188328116
1	188326616	188329616
1	188455616	188458616
1	188865116	188868116
1	189087116	189090116
1	189094616	189097616
1	189616616	189619616
1	189619616	189622616
1	189627116	189630116
1	189643616	189646616
1	189645116	189648116
1	189646616	189649616
1	192547612	192550612
1	192549112	192552112
1	192678112	192681112
1	194035729	194038729
1	194068729	194071729
1	194379229	194382229
1	194385229	194388229
1	194386729	194389729
1	194388229	194391229
1	194389729	194392729
1	195042229	195045229
1	195043729	195046729
1	195049729	195052729
1	195084229	195087229
1	195085729	195088729
1	195087229	195090229
1	195088729	195091729
1	195090229	195093229
1	195093229	195096229
1	195102229	195105229
1	195775729	195778729
1	195799729	195802729
1	195802729	195805729
1	195804229	195807229
1	195805729	195808729
1	195820729	195823729
1	195822229	195825229
1	195823729	195826729
1	195825229	195828229
1	195826729	195829729
1	195828229	195831229
1	195829729	195832729
1	195835607	195838607
1	195913607	195916607
1	195915107	195918107
1	199356126	199359126
1	199593126	199596126
1	199600626	199603626
1	199602126	199605126
1	200691126	200694126
1	200692626	200695626
1	201474126	201477126
1	201943622	201946622
1	201945122	201948122
1	201952622	201955622
1	201954122	201957122
1	203653622	203656622
1	204285122	204288122
1	204790622	204793622
1	204904645	204907645
1	204906145	204909145
1	205374145	205377145
1	205507645	205510645
1	207204145	207207145
1	208128806	208131806
1	211688153	211691153
1	211691153	211694153
1	211703153	211706153
1	211704653	211707653
1	213650153	213653153
1	217587167	217590167
1	218188667	218191667
1	219921340	219924340
1	219958840	219961840
1	219960340	219963340
1	220141840	220144840
1	220494340	220497340
1	220495840	220498840
1	220497340	220500340
1	220944340	220947340
1	221820340	221823340
1	221830840	221833840
1	223638245	223641245
1	223639745	223642745
1	224259245	224262245
1	224274245	224277245
1	224275745	224278745
1	224277245	224280245
1	224779745	224782745
1	226630604	226633604
1	226635104	226638104
1	226636604	226639604
1	227389604	227392604
1	227502104	227505104
1	228964673	228967673
1	228966173	228969173
1	228967673	228970673
1	230503673	230506673
1	231210173	231213173
1	232137088	232140088
1	232138588	232141588
1	232270588	232273588
1	232272088	232275088
1	232275088	232278088
1	233281588	233284588
1	233488588	233491588
1	233518588	233521588
1	233521588	233524588
1	233523088	233526088
1	233524588	233527588
1	234126088	234129088
1	234130588	234133588
1	234132088	234135088
1	235032132	235035132
1	236379132	236382132
1	236382132	236385132
1	236383632	236386632
1	236385132	236388132
1	236514132	236517132
1	236518632	236521632
1	236520132	236523132
1	236526132	236529132
1	236527632	236530632
1	236532132	236535132
1	236700132	236703132
1	236701632	236704632
1	236706132	236709132
1	236707632	236710632
1	236709132	236712132
1	236713632	236716632
1	236745132	236748132
1	236746632	236749632
1	236793132	236796132
1	237684132	237687132
1	237685632	237688632
1	237724632	237727632
1	237736632	237739632
1	237738132	237741132
1	237739632	237742632
1	237741132	237744132
1	237742632	237745632
1	238414627	238417627
1	238471627	238474627
1	238474627	238477627
1	238504627	238507627
1	238627627	238630627
1	238629127	238632127
1	238635127	238638127
1	238852627	238855627
1	238854127	238857127
1	240172627	240175627
1	240174127	240177127
1	240178627	240181627
1	240217627	240220627
1	240219127	240222127
1	240597127	240600127
1	240601627	240604627
1	241248156	241251156
1	241890156	241893156
1	242404656	242407656
1	246379860	246382860
1	246399360	246402360
1	246415860	246418860
1	246417360	246420360
1	247614256	247617256
1	247617256	247620256
1	247623256	247626256
1	247624756	247627756
1	247815256	247818256
1	247945756	247948756
1	247947256	247950256
1	247965256	247968256
1	248140756	248143756
1	248512756	248515756
1	248514256	248517256
1	248547256	248550256
1	248548756	248551756
1	248575756	248578756
1	248632756	248635756
1	248866756	248869756
1	248868256	248871256
2	616056	619056
2	617556	620556
2	656556	659556
2	658056	661056
2	850056	853056
2	1115556	1118556
2	1117056	1120056
2	1118556	1121556
2	1138056	1141056
2	1139556	1142556
2	1141056	1144056
2	1237056	1240056
2	1238556	1241556
2	1258056	1261056
2	1259556	1262556
2	1363056	1366056
2	1364556	1367556
2	1367556	1370556
2	1640556	1643556
2	1741056	1744056
2	2608056	2611056
2	4861026	4864026
2	6278600	6281600
2	6284600	6287600
2	6332600	6335600
2	7630100	7633100
2	8728100	8731100
2	10367577	10370577
2	10669077	10672077
2	10711077	10714077
2	11018577	11021577
2	12308527	12311527
2	12310027	12313027
2	13120027	13123027
2	15163065	15166065
2	15164565	15167565
2	15538065	15541065
2	15593565	15596565
2	15595065	15598065
2	16435065	16438065
2	16661565	16664565
2	16663065	16666065
2	16664565	16667565
2	17059065	17062065
2	17986065	17989065
2	18260629	18263629
2	18263629	18266629
2	18265129	18268129
2	18269629	18272629
2	18271129	18274129
2	18277129	18280129
2	18589129	18592129
2	18590629	18593629
2	18592129	18595129
2	18593629	18596629
2	18595129	18598129
2	18596629	18599629
2	18598129	18601129
2	18599629	18602629
2	18601129	18604129
2	18602629	18605629
2	18604129	18607129
2	18605629	18608629
2	18656629	18659629
2	18658129	18661129
2	19693129	19696129
2	19792129	19795129
2	19916629	19919629
2	21382111	21385111
2	21392611	21395611
2	22553611	22556611
2	22616611	22619611
2	23540611	23543611
2	28575450	28578450
2	28819950	28822950
2	31270130	31273130
2	31397630	31400630
2	31409630	31412630
2	31502630	31505630
2	33400103	33403103
2	33401603	33404603
2	33403103	33406103
2	33404603	33407603
2	33406103	33409103
2	34139603	34142603
2	34147103	34150103
2	34183103	34186103
2	34184603	34187603
2	35737103	35740103
2	35869103	35872103
2	35873603	35876603
2	35875103	35878103
2	35876603	35879603
2	35878103	35881103
2	35879603	35882603
2	35881103	35884103
2	35882603	35885603
2	35885603	35888603
2	35887103	35890103
2	35905103	35908103
2	36116529	36119529
2	36118029	36121029
2	36895029	36898029
2	36928029	36931029
2	37045029	37048029
2	38054529	38057529
2	38056029	38059029
2	38057529	38060529
2	38059029	38062029
2	38060529	38063529
2	38062029	38065029
2	38482029	38485029
2	38686029	38689029
2	38687529	38690529
2	40115804	40118804
2	41939804	41942804
2	41963804	41966804
2	41965304	41968304
2	42241024	42244024
2	42242524	42245524
2	43342024	43345024
2	43343524	43346524
2	43883524	43886524
2	45209539	45212539
2	45211039	45214039
2	48937028	48940028
2	50216528	50219528
2	50224028	50227028
2	50225528	50228528
2	52306023	52309023
2	52721523	52724523
2	52931523	52934523
2	52999023	53002023
2	54805027	54808027
2	55642027	55645027
2	65783632	65786632
2	65785132	65788132
2	66010008	66013008
2	66094008	66097008
2	68027508	68030508
2	68029008	68032008
2	68173008	68176008
2	68599008	68602008
2	68600508	68603508
2	69191524	69194524
2	69221524	69224524
2	69223024	69226024
2	69224524	69227524
2	69226024	69229024
2	69851524	69854524
2	70040524	70043524
2	70042024	70045024
2	70639024	70642024
2	71050024	71053024
2	71051524	71054524
2	71053024	71056024
2	73366147	73369147
2	74930647	74933647
2	74968147	74971147
2	75559453	75562453
2	75560953	75563953
2	76073953	76076953
2	77221453	77224453
2	77963953	77966953
2	79225061	79228061
2	79226561	79229561
2	79228061	79231061
2	79229561	79232561
2	83225537	83228537
2	84053636	84056636
2	84055136	84058136
2	84056636	84059636
2	84199136	84202136
2	84200636	84203636
2	84440636	84443636
2	85924136	85927136
2	85925636	85928636
2	85927136	85930136
2	88393027	88396027
2	88736527	88739527
2	100982511	100985511
2	101060511	101063511
2	101071011	101074011
2	101072511	101075511
2	101078511	101081511
2	101081511	101084511
2	101083011	101086011
2	101084511	101087511
2	101245011	101248011
2	101246511	101249511
2	102050575	102053575
2	102052075	102055075
2	102053575	102056575
2	102055075	102058075
2	102056575	102059575
2	102077575	102080575
2	102178075	102181075
2	102725575	102728575
2	106126008	106129008
2	106145508	106148508
2	106615008	106618008
2	109928594	109931594
2	109930094	109933094
2	109931594	109934594
2	109933094	109936094
2	113821921	113824921
2	113838421	113841421
2	117227545	117230545
2	117229045	117232045
2	117592045	117595045
2	117722545	117725545
2	117724045	117727045
2	118400545	118403545
2	118402045	118405045
2	121462074	121465074
2	121463574	121466574
2	121466574	121469574
2	121796574	121799574
2	121798074	121801074
2	122051574	122054574
2	122054574	122057574
2	123842512	123845512
2	123920512	123923512
2	124274512	124277512
2	125299012	125302012
2	125300512	125303512
2	127526509	127529509
2	127684009	127687009
2	127685509	127688509
2	127687009	127690009
2	127723009	127726009
2	127724509	127727509
2	129340029	129343029
2	129343029	129346029
2	129344529	129347529
2	129356529	129359529
2	129505029	129508029
2	129511029	129514029
2	133642593	133645593
2	135416518	135419518
2	137257018	137260018
2	137962018	137965018
2	137963518	137966518
2	137966518	137969518
2	137968018	137971018
2	137980018	137983018
2	137981518	137984518
2	140165771	140168771
2	142007519	142010519
2	142091519	142094519
2	142096019	142099019
2	142228019	142231019
2	142229519	142232519
2	142231019	142234019
2	142232519	142235519
2	143554019	143557019
2	150001036	150004036
2	150002536	150005536
2	150004036	150007036
2	150005536	150008536
2	150007036	150010036
2	150607065	150610065
2	150610065	150613065
2	150619065	150622065
2	150620565	150623565
2	150622065	150625065
2	150623565	150626565
2	151871565	151874565
2	151873065	151876065
2	153215642	153218642
2	155254142	155257142
2	155255642	155258642
2	158957556	158960556
2	160073639	160076639
2	160075139	160078139
2	165041547	165044547
2	165631047	165634047
2	167449047	167452047
2	167450547	167453547
2	168654637	168657637
2	168873637	168876637
2	169029637	169032637
2	169032637	169035637
2	169034137	169037137
2	169499137	169502137
2	169500637	169503637
2	169827637	169830637
2	170630137	170633137
2	170631637	170634637
2	170633137	170636137
2	170637637	170640637
2	171134794	171137794
2	171146794	171149794
2	171148294	171151294
2	171151294	171154294
2	172375294	172378294
2	172376794	172379794
2	173044294	173047294
2	173072794	173075794
2	173843794	173846794
2	173845294	173848294
2	174518501	174521501
2	174593501	174596501
2	176333501	176336501
2	176398001	176401001
2	176399501	176402501
2	178526572	178529572
2	178528072	178531072
2	178678072	178681072
2	179932072	179935072
2	181790533	181793533
2	182992033	182995033
2	182993533	182996533
2	183352449	183355449
2	183353949	183356949
2	183464949	183467949
2	183466449	183469449
2	184595949	184598949
2	187691553	187694553
2	187765053	187768053
2	187766553	187769553
2	192163067	192166067
2	192164567	192167567
2	192166067	192169067
2	193157567	193160567
2	194366567	194369567
2	194368067	194371067
2	194372567	194375567
2	196058553	196061553
2	196066053	196069053
2	196067553	196070553
2	196072053	196075053
2	196073553	196076553
2	196075053	196078053
2	197084553	197087553
2	204692586	204695586
2	207580004	207583004
2	209020004	209023004
2	209065004	209068004
2	209066504	209069504
2	209615504	209618504
2	212389136	212392136
2	212390636	212393636
2	213187077	213190077
2	214717077	214720077
2	214718577	214721577
2	214720077	214723077
2	214721577	214724577
2	214724577	214727577
2	214732077	214735077
2	214733577	214736577
2	214735077	214738077
2	214736577	214739577
2	215476077	215479077
2	215477577	215480577
2	215630577	215633577
2	215632077	215635077
2	215908077	215911077
2	215909577	215912577
2	217148597	217151597
2	217571597	217574597
2	218477597	218480597
2	218710097	218713097
2	218711597	218714597
2	218782097	218785097
2	218783597	218786597
2	220961536	220964536
2	222217115	222220115
2	222218615	222221615
2	223870115	223873115
2	223871615	223874615
2	225232031	225235031
2	226024031	226027031
2	226025531	226028531
2	226034531	226037531
2	226046531	226049531
2	226048031	226051031
2	226049531	226052531
2	226888031	226891031
2	228091128	228094128
2	228092628	228095628
2	228464628	228467628
2	228466128	228469128
2	228469128	228472128
2	228490128	228493128
2	228491628	228494628
2	228535128	228538128
2	228536628	228539628
2	228544128	228547128
2	228994128	228997128
2	229925628	229928628
2	230959128	230962128
2	230960628	230963628
2	230995128	230998128
2	231425596	231428596
2	231427096	231430096
2	231430096	231433096
2	231437596	231440596
2	231877096	231880096
2	233218096	233221096
2	233426596	233429596
2	233428096	233431096
2	233930596	233933596
2	233960596	233963596
2	234057733	234060733
2	234062233	234065233
2	234063733	234066733
2	234065233	234068233
2	235508233	235511233
2	235598233	235601233
2	235668733	235671733
2	235671733	235674733
2	235802233	235805233
2	235803733	235806733
2	236180233	236183233
2	236610733	236613733
2	236612233	236615233
2	237154278	237157278
2	237155778	237158778
2	237763278	237766278
2	237767778	237770778
2	237769278	237772278
2	238046778	238049778
2	238048278	238051278
2	238049778	238052778
2	238051278	238054278
2	238052778	238055778
2	238054278	238057278
2	238055778	238058778
2	238210278	238213278
2	238211778	238214778
2	238457778	238460778
2	238495278	238498278
2	238535778	238538778
2	238637778	238640778
2	240433012	240436012
2	241018012	241021012
2	241019512	241022512
2	241114012	241117012
2	241118512	241121512
2	241120012	241123012
2	241121512	241124512
2	241199512	241202512
2	242048512	242051512
3	668178	671178
3	728178	731178
3	729678	732678
3	731178	734178
3	1197678	1200678
3	1512678	1515678
3	1514178	1517178
3	1637178	1640178
3	1670178	1673178
3	1848678	1851678
3	1850178	1853178
3	1931178	1934178
3	1932678	1935678
3	2955678	2958678
3	2958678	2961678
3	2960178	2963178
3	3767065	3770065
3	3768565	3771565
3	3776065	3779065
3	3779065	3782065
3	4013065	4016065
3	5714065	5717065
3	7364013	7367013
3	7365513	7368513
3	7370013	7373013
3	7620513	7623513
3	7904013	7907013
3	7923513	7926513
3	7974513	7977513
3	7985013	7988013
3	8177013	8180013
3	10166211	10169211
3	10784211	10787211
3	13109008	13112008
3	13110508	13113508
3	13193008	13196008
3	13257508	13260508
3	13473508	13476508
3	13475008	13478008
3	13476508	13479508
3	14126008	14129008
3	14127508	14130508
3	14129008	14132008
3	14133508	14136508
3	14135008	14138008
3	14328508	14331508
3	16182510	16185510
3	16184010	16187010
3	16185510	16188510
3	16358010	16361010
3	18819570	18822570
3	20505570	20508570
3	20511570	20514570
3	20513070	20516070
3	20570070	20573070
3	20571570	20574570
3	20768070	20771070
3	20820570	20823570
3	20822070	20825070
3	21485214	21488214
3	21957714	21960714
3	21959214	21962214
3	21999714	22002714
3	22560714	22563714
3	22562214	22565214
3	22944714	22947714
3	22946214	22949214
3	23975214	23978214
3	27662041	27665041
3	28149541	28152541
3	28151041	28154041
3	29406541	29409541
3	29762041	29765041
3	30251036	30254036
3	30903536	30906536
3	31775036	31778036
3	31776536	31779536
3	32663036	32666036
3	32664536	32667536
3	32666036	32669036
3	32667536	32670536
3	34268029	34271029
3	34269529	34272529
3	34712029	34715029
3	34721029	34724029
3	36207553	36210553
3	36209053	36212053
3	36212053	36215053
3	36213553	36216553
3	39288511	39291511
3	39290011	39293011
3	39515011	39518011
3	39531511	39534511
3	39537511	39540511
3	39539011	39542011
3	39540511	39543511
3	39548011	39551011
3	39951511	39954511
3	39953011	39956011
3	39971011	39974011
3	39972511	39975511
3	40094011	40097011
3	40095511	40098511
3	40097011	40100011
3	40103011	40106011
3	40106011	40109011
3	41049511	41052511
3	41373511	41376511
3	41375011	41378011
3	41475511	41478511
3	41585011	41588011
3	41586511	41589511
3	41589511	41592511
3	41594011	41597011
3	41595511	41598511
3	41862511	41865511
3	41864011	41867011
3	42335087	42338087
3	42369587	42372587
3	46782519	46785519
3	52853055	52856055
3	60110022	60113022
3	61049022	61052022
3	61050522	61053522
3	61052022	61055022
3	61053522	61056522
3	62723022	62726022
3	63272062	63275062
3	64098562	64101562
3	64100062	64103062
3	64920562	64923562
3	65852062	65855062
3	67655062	67658062
3	67656562	67659562
3	67658062	67661062
3	67659562	67662562
3	69413369	69416369
3	69414869	69417869
3	69416369	69419369
3	69581369	69584369
3	70346369	70349369
3	70347869	70350869
3	72231563	72234563
3	73365563	73368563
3	73367063	73370063
3	73368563	73371563
3	73376063	73379063
3	73826063	73829063
3	74768063	74771063
3	74769563	74772563
3	74772563	74775563
3	74783063	74786063
3	75599072	75602072
3	75600572	75603572
3	75602072	75605072
3	75603572	75606572
3	75605072	75608072
3	75606572	75609572
3	76985072	76988072
3	77601572	77604572
3	79958044	79961044
3	84507918	84510918
3	84509418	84512418
3	84510918	84513918
3	87344059	87347059
3	87345559	87348559
3	87374059	87377059
3	87375559	87378559
3	87398059	87401059
3	87399559	87402559
3	87401059	87404059
3	94204955	94207955
3	94206455	94209455
3	95140955	95143955
3	95146955	95149955
3	95148455	95151455
3	95149955	95152955
3	95151455	95154455
3	95152955	95155955
3	95155955	95158955
3	95158955	95161955
3	95163455	95166455
3	95164955	95167955
3	95167955	95170955
3	95169455	95172455
3	95170955	95173955
3	95172455	95175455
3	95173955	95176955
3	95175455	95178455
3	95178455	95181455
3	95179955	95182955
3	95181455	95184455
3	95182955	95185955
3	95190455	95193455
3	95656955	95659955
3	95661455	95664455
3	95665955	95668955
3	95667455	95670455
3	95668955	95671955
3	95670455	95673455
3	96818065	96821065
3	96819565	96822565
3	97788565	97791565
3	97790065	97793065
3	97793065	97796065
3	97800565	97803565
3	97890565	97893565
3	97899565	97902565
3	97904065	97907065
3	97905565	97908565
3	97907065	97910065
3	97919065	97922065
3	97920565	97923565
3	97938565	97941565
3	97940065	97943065
3	97941565	97944565
3	97946065	97949065
3	97950565	97953565
3	97983565	97986565
3	98027065	98030065
3	98028565	98031565
3	98727565	98730565
3	98735065	98738065
3	98736565	98739565
3	98738065	98741065
3	98741065	98744065
3	98742565	98745565
3	98744065	98747065
3	98745565	98748565
3	98747065	98750065
3	98751565	98754565
3	98765065	98768065
3	99129504	99132504
3	99131004	99134004
3	99134004	99137004
3	100811004	100814004
3	101976504	101979504
3	103344665	103347665
3	103350665	103353665
3	103352165	103355165
3	103466165	103469165
3	103938665	103941665
3	103940165	103943165
3	103941665	103944665
3	104237165	104240165
3	104238665	104241665
3	104417165	104420165
3	104420165	104423165
3	104666165	104669165
3	104804165	104807165
3	105690083	105693083
3	105691583	105694583
3	105693083	105696083
3	105694583	105697583
3	105696083	105699083
3	106011083	106014083
3	106012583	106015583
3	106030583	106033583
3	106032083	106035083
3	106033583	106036583
3	106383083	106386083
3	107701583	107704583
3	108876609	108879609
3	108878109	108881109
3	109652109	109655109
3	109653609	109656609
3	109974609	109977609
3	111036609	111039609
3	111926192	111929192
3	111927692	111930692
3	111948692	111951692
3	111956192	111959192
3	111957692	111960692
3	111959192	111962192
3	111971192	111974192
3	111984692	111987692
3	112851692	112854692
3	115683590	115686590
3	115685090	115688090
3	116801090	116804090
3	116802590	116805590
3	121638123	121641123
3	121639623	121642623
3	121641123	121644123
3	121642623	121645623
3	121644123	121647123
3	122298123	122301123
3	122299623	122302623
3	122302623	122305623
3	123101070	123104070
3	123102570	123105570
3	123104070	123107070
3	124290570	124293570
3	124322070	124325070
3	124340070	124343070
3	124692570	124695570
3	125844570	125847570
3	125849070	125852070
3	125855070	125858070
3	125858070	125861070
3	125945070	125948070
3	125946570	125949570
3	125948070	125951070
3	125949570	125952570
3	125951070	125954070
3	125952570	125955570
3	128247520	128250520
3	129083020	129086020
3	129662189	129665189
3	131078189	131081189
3	131079689	131082689
3	131267189	131270189
3	131268689	131271689
3	131384189	131387189
3	131595689	131598689
3	131597189	131600189
3	131645189	131648189
3	131646689	131649689
3	131675189	131678189
3	131724689	131727689
3	131726189	131729189
3	134152160	134155160
3	134153660	134156660
3	134680160	134683160
3	140907586	140910586
3	140909086	140912086
3	143420002	143423002
3	143421502	143424502
3	144614037	144617037
3	145233537	145236537
3	145238037	145241037
3	145698537	145701537
3	145700037	145703037
3	145701537	145704537
3	145703037	145706037
3	145739037	145742037
3	145740537	145743537
3	145742037	145745037
3	145743537	145746537
3	145745037	145748037
3	145982037	145985037
3	145983537	145986537
3	146255037	146258037
3	146256537	146259537
3	146258037	146261037
3	147827172	147830172
3	148005672	148008672
3	148616172	148619172
3	148620672	148623672
3	148622172	148625172
3	149388672	149391672
3	149390172	149393172
3	149397672	149400672
3	149880672	149883672
3	151481034	151484034
3	151925034	151928034
3	151926534	151929534
3	151928034	151931034
3	152240034	152243034
3	153042534	153045534
3	153044034	153047034
3	153729623	153732623
3	153731123	153734123
3	153735623	153738623
3	154275623	154278623
3	154277123	154280123
3	155318123	155321123
3	161808699	161811699
3	161810199	161813199
3	161811699	161814699
3	161813199	161816199
3	161814699	161817699
3	162236492	162239492
3	162603992	162606992
3	162608492	162611492
3	162636992	162639992
3	162641492	162644492
3	162723992	162726992
3	162726992	162729992
3	162728492	162731492
3	162729992	162732992
3	162731492	162734492
3	164091992	164094992
3	164093492	164096492
3	164115992	164118992
3	164117492	164120492
3	164120492	164123492
3	164129492	164132492
3	164144492	164147492
3	164180492	164183492
3	164181992	164184992
3	164183492	164186492
3	165456576	165459576
3	165842076	165845076
3	165843576	165846576
3	165845076	165848076
3	165846576	165849576
3	165849576	165852576
3	165851076	165854076
3	165852576	165855576
3	165854076	165857076
3	165855576	165858576
3	165857076	165860076
3	166037076	166040076
3	166044576	166047576
3	167156076	167159076
3	167831076	167834076
3	168704431	168707431
3	169722931	169725931
3	170384431	170387431
3	170385931	170388931
3	171440038	171443038
3	171801538	171804538
3	172658038	172661038
3	172659538	172662538
3	172661038	172664038
3	172662538	172665538
3	172664038	172667038
3	172665538	172668538
3	173868538	173871538
3	174771616	174774616
3	176181616	176184616
3	176505616	176508616
3	176513116	176516116
3	176514616	176517616
3	176597116	176600116
3	176598616	176601616
3	176607616	176610616
3	177294542	177297542
3	177296042	177299042
3	177297542	177300542
3	177299042	177302042
3	180452070	180455070
3	182451570	182454570
3	183050070	183053070
3	183179306	183182306
3	183180806	183183806
3	183312806	183315806
3	183360806	183363806
3	183369806	183372806
3	183377306	183380306
3	183378806	183381806
3	184766306	184769306
3	184767806	184770806
3	184778306	184781306
3	186434163	186437163
3	186435663	186438663
3	186437163	186440163
3	186438663	186441663
3	186440163	186443163
3	186777663	186780663
3	186779163	186782163
3	189246505	189249505
3	189248005	189251005
3	189873505	189876505
3	189948505	189951505
3	190053505	190056505
3	190055005	190058005
3	190059505	190062505
3	190511005	190514005
3	190512505	190515505
3	190514005	190517005
3	190515505	190518505
3	190517005	190520005
3	190890505	190893505
3	190892005	190895005
3	190919005	190922005
3	191360005	191363005
3	191361505	191364505
3	191429005	191432005
3	191430505	191433505
3	191432005	191435005
3	192371112	192374112
3	192449112	192452112
3	192450612	192453612
3	192617112	192620112
3	192735612	192738612
3	192876612	192879612
3	193875612	193878612
3	193944612	193947612
3	193946112	193949112
3	194667612	194670612
3	194669112	194672112
3	194670612	194673612
3	197144109	197147109
4	534928	537928
4	536428	539428
4	537928	540928
4	1415428	1418428
4	2175928	2178928
4	2177428	2180428
4	2178928	2181928
4	2181928	2184928
4	2183428	2186428
4	2184928	2187928
4	2186428	2189428
4	2187928	2190928
4	2190928	2193928
4	2192428	2195428
4	2193928	2196928
4	2369428	2372428
4	3793634	3796634
4	3795134	3798134
4	3796634	3799634
4	3798134	3801134
4	3799634	3802634
4	4284134	4287134
4	4348634	4351634
4	4684634	4687634
4	4687634	4690634
4	5308634	5311634
4	5310134	5313134
4	5311634	5314634
4	5313134	5316134
4	5314634	5317634
4	5316134	5319134
4	5616134	5619134
4	5965634	5968634
4	5991134	5994134
4	6414081	6417081
4	7317081	7320081
4	7318581	7321581
4	7498581	7501581
4	8329581	8332581
4	9951518	9954518
4	9953018	9956018
4	9956018	9959018
4	9957518	9960518
4	9963518	9966518
4	11948018	11951018
4	12090048	12093048
4	12546048	12549048
4	12547548	12550548
4	12585048	12588048
4	12918048	12921048
4	12919548	12922548
4	16417590	16420590
4	17304090	17307090
4	17307090	17310090
4	17308590	17311590
4	17695590	17698590
4	18748720	18751720
4	18750220	18753220
4	20131720	20134720
4	21114144	21117144
4	22335144	22338144
4	25000621	25003621
4	25078621	25081621
4	25629121	25632121
4	28917106	28920106
4	28918606	28921606
4	28981606	28984606
4	31336994	31339994
4	31437494	31440494
4	31438994	31441994
4	31588994	31591994
4	31590494	31593494
4	31591994	31594994
4	32251994	32254994
4	32254994	32257994
4	32574494	32577494
4	32575994	32578994
4	32656994	32659994
4	32989994	32992994
4	32991494	32994494
4	32992994	32995994
4	33730619	33733619
4	34506119	34509119
4	34752119	34755119
4	34755119	34758119
4	35512619	35515619
4	35514119	35517119
4	35515619	35518619
4	35517119	35520119
4	35518619	35521619
4	35551619	35554619
4	35605619	35608619
4	35607119	35610119
4	35608619	35611619
4	35610119	35613119
4	35695619	35698619
4	36447039	36450039
4	36621039	36624039
4	36622539	36625539
4	36624039	36627039
4	36625539	36628539
4	36627039	36630039
4	36628539	36631539
4	36906039	36909039
4	36946539	36949539
4	37044039	37047039
4	37050039	37053039
4	37159539	37162539
4	37516539	37519539
4	37518039	37521039
4	37519539	37522539
4	37522539	37525539
4	37524039	37527039
4	37525539	37528539
4	37800039	37803039
4	37801539	37804539
4	37807539	37810539
4	37852539	37855539
4	38187039	38190039
4	38194539	38197539
4	38196039	38199039
4	38197539	38200539
4	38212539	38215539
4	38784039	38787039
4	38785539	38788539
4	38787039	38790039
4	38875539	38878539
4	38877039	38880039
4	38878539	38881539
4	38991039	38994039
4	39108044	39111044
4	39109544	39112544
4	39117044	39120044
4	41200544	41203544
4	41322044	41325044
4	41592044	41595044
4	41593544	41596544
4	42178963	42181963
4	42181963	42184963
4	42183463	42186463
4	42673963	42676963
4	42675463	42678463
4	42679963	42682963
4	42738463	42741463
4	42739963	42742963
4	42741463	42744463
4	42748963	42751963
4	43204963	43207963
4	43956463	43959463
4	44661463	44664463
4	44662963	44665963
4	44868463	44871463
4	48174046	48177046
4	53361441	53364441
4	54472649	54475649
4	56025149	56028149
4	56026649	56029649
4	56035649	56038649
4	56037149	56040149
4	56142149	56145149
4	56143649	56146649
4	56145149	56148149
4	56149649	56152649
4	56151149	56154149
4	56152649	56155649
4	56163149	56166149
4	56608649	56611649
4	57123131	57126131
4	57124631	57127631
4	57127631	57130631
4	57685631	57688631
4	57697631	57700631
4	57916631	57919631
4	57918131	57921131
4	57919631	57922631
4	57940631	57943631
4	58161131	58164131
4	58167131	58170131
4	58168631	58171631
4	58567631	58570631
4	58569131	58572131
4	58570631	58573631
4	58572131	58575131
4	58719131	58722131
4	58720631	58723631
4	58957631	58960631
4	58959131	58962131
4	58960631	58963631
4	59355131	59358131
4	59356631	59359631
4	59608631	59611631
4	59610131	59613131
4	59629631	59632631
4	59808131	59811131
4	59809631	59812631
4	59811131	59814131
4	59812631	59815631
4	60426156	60429156
4	61281156	61284156
4	61282656	61285656
4	61284156	61287156
4	61309656	61312656
4	61330656	61333656
4	62614656	62617656
4	63648059	63651059
4	63651059	63654059
4	63652559	63655559
4	63654059	63657059
4	64534559	64537559
4	64536059	64539059
4	65263559	65266559
4	65265059	65268059
4	65538059	65541059
4	65817059	65820059
4	66718575	66721575
4	66751575	66754575
4	66993075	66996075
4	66994575	66997575
4	67753575	67756575
4	68914575	68917575
4	68916075	68919075
4	69347015	69350015
4	69348515	69351515
4	69350015	69353015
4	69392015	69395015
4	69593015	69596015
4	69594515	69597515
4	69609515	69612515
4	70388015	70391015
4	70389515	70392515
4	70392515	70395515
4	70394015	70397015
4	70395515	70398515
4	70413515	70416515
4	70415015	70418015
4	70418015	70421015
4	70422515	70425515
4	70427015	70430015
4	70428515	70431515
4	70488515	70491515
4	70491515	70494515
4	71208515	71211515
4	71210015	71213015
4	71211515	71214515
4	71213015	71216015
4	71214515	71217515
4	71366015	71369015
4	71381015	71384015
4	71385515	71388515
4	71588015	71591015
4	72907902	72910902
4	73419402	73422402
4	73444902	73447902
4	73446402	73449402
4	73447902	73450902
4	73449402	73452402
4	73491402	73494402
4	73494402	73497402
4	73629402	73632402
4	73630902	73633902
4	73638402	73641402
4	74449902	74452902
4	74451402	74454402
4	75199613	75202613
4	75201113	75204113
4	75207113	75210113
4	75211613	75214613
4	75421613	75424613
4	75769613	75772613
4	76192613	76195613
4	76194113	76197113
4	76212113	76215113
4	76302113	76305113
4	76303613	76306613
4	76951613	76954613
4	76953113	76956113
4	76954613	76957613
4	76960613	76963613
4	76962113	76965113
4	76969613	76972613
4	76971113	76974113
4	76972613	76975613
4	76989113	76992113
4	77028113	77031113
4	77073113	77076113
4	77094113	77097113
4	77452613	77455613
4	77454113	77457113
4	78099199	78102199
4	78100699	78103699
4	78205699	78208699
4	78232699	78235699
4	78234199	78237199
4	78244699	78247699
4	78249199	78252199
4	78258199	78261199
4	78262699	78265699
4	78291199	78294199
4	78303199	78306199
4	79260199	79263199
4	79420699	79423699
4	79429699	79432699
4	79449199	79452199
4	79452199	79455199
4	79453699	79456699
4	80808199	80811199
4	82549615	82552615
4	82551115	82554115
4	82552615	82555615
4	83553115	83556115
4	83554615	83557615
4	83659615	83662615
4	83661115	83664115
4	84157583	84160583
4	84159083	84162083
4	84160583	84163583
4	84171083	84174083
4	84526583	84529583
4	84528083	84531083
4	84804083	84807083
4	84826583	84829583
4	84943583	84946583
4	84945083	84948083
4	85024583	85027583
4	85467083	85470083
4	86037083	86040083
4	86460083	86463083
4	86472083	86475083
4	86473583	86476583
4	86475083	86478083
4	86476583	86479583
4	86478083	86481083
4	86479583	86482583
4	86481083	86484083
4	86571083	86574083
4	86572583	86575583
4	88293325	88296325
4	88669825	88672825
4	88671325	88674325
4	88782325	88785325
4	88786825	88789825
4	89094325	89097325
4	89739325	89742325
4	90163593	90166593
4	90165093	90168093
4	90166593	90169593
4	90591093	90594093
4	91714593	91717593
4	91719093	91722093
4	92278593	92281593
4	92280093	92283093
4	93504078	93507078
4	94801578	94804578
4	94803078	94806078
4	94804578	94807578
4	96700679	96703679
4	96702179	96705179
4	96703679	96706679
4	97423679	97426679
4	97425179	97428179
4	97426679	97429679
4	97428179	97431179
4	97431179	97434179
4	97432679	97435679
4	97434179	97437179
4	98982179	98985179
4	99007679	99010679
4	99015143	99018143
4	99019643	99022643
4	99021143	99024143
4	99024143	99027143
4	99025643	99028643
4	99027143	99030143
4	99028643	99031643
4	99036143	99039143
4	99037643	99040643
4	99039143	99042143
4	99043643	99046643
4	99045143	99048143
4	99048143	99051143
4	99054143	99057143
4	99055643	99058643
4	99465143	99468143
4	99675143	99678143
4	100291643	100294643
4	100293143	100296143
4	100294643	100297643
4	100299143	100302143
4	101106143	101109143
4	101124143	101127143
4	101446643	101449643
4	101479643	101482643
4	101506643	101509643
4	101850143	101853143
4	103551143	103554143
4	103552643	103555643
4	103554143	103557143
4	103555643	103558643
4	103594643	103597643
4	104469143	104472143
4	109920156	109923156
4	110151156	110154156
4	110152656	110155656
4	111126166	111129166
4	111856666	111859666
4	112762666	112765666
4	114795073	114798073
4	115012573	115015573
4	115140073	115143073
4	115143073	115146073
4	115144573	115147573
4	115146073	115149073
4	115147573	115150573
4	115411573	115414573
4	115413073	115416073
4	115414573	115417573
4	115986073	115989073
4	115987573	115990573
4	115989073	115992073
4	116176573	116179573
4	116374573	116377573
4	116376073	116379073
4	116389573	116392573
4	116391073	116394073
4	116394073	116397073
4	116395573	116398573
4	116406073	116409073
4	116449573	116452573
4	116451073	116454073
4	116452573	116455573
4	116506573	116509573
4	116509573	116512573
4	116511073	116514073
4	117891104	117894104
4	118653104	118656104
4	120007604	120010604
4	120040616	120043616
4	120043616	120046616
4	120045116	120048116
4	120046616	120049616
4	120048116	120051116
4	120237116	120240116
4	121516616	121519616
4	122512616	122515616
4	122662616	122665616
4	122664116	122667116
4	122883116	122886116
4	122955116	122958116
4	122956616	122959616
4	122958116	122961116
4	127059044	127062044
4	127060544	127063544
4	127437044	127440044
4	129592162	129595162
4	129593662	129596662
4	130765162	130768162
4	131254162	131257162
4	131596162	131599162
4	131800162	131803162
4	131801662	131804662
4	133032069	133035069
4	133549569	133552569
4	133551069	133554069
4	133644069	133647069
4	133645569	133648569
4	133764069	133767069
4	133848069	133851069
4	133849569	133852569
4	135772546	135775546
4	135898546	135901546
4	137950546	137953546
4	138366062	138369062
4	139117562	139120562
4	142960613	142963613
4	142962113	142965113
4	143013113	143016113
4	143892113	143895113
4	143940113	143943113
4	144654155	144657155
4	144655655	144658655
4	144657155	144660155
4	144658655	144661655
4	145195655	145198655
4	145197155	145200155
4	147943573	147946573
4	147945073	147948073
4	148021573	148024573
4	148023073	148026073
4	150075928	150078928
4	154003650	154006650
4	154746150	154749150
4	155358150	155361150
4	155359650	155362650
4	155406150	155409150
4	155766150	155769150
4	155775150	155778150
4	156099072	156102072
4	156100572	156103572
4	156108072	156111072
4	157509072	157512072
4	157746072	157749072
4	157980072	157983072
4	157984572	157987572
4	158442072	158445072
4	158443572	158446572
4	159194443	159197443
4	159333943	159336943
4	159335443	159338443
4	159339943	159342943
4	159341443	159344443
4	159342943	159345943
4	160659943	160662943
4	160661443	160664443
4	160664443	160667443
4	161471443	161474443
4	161472943	161475943
4	161681443	161684443
4	161682943	161685943
4	161684443	161687443
4	162028665	162031665
4	162030165	162033165
4	162223665	162226665
4	162225165	162228165
4	162226665	162229665
4	162231165	162234165
4	162232665	162235665
4	162234165	162237165
4	162235665	162238665
4	163260165	163263165
4	163261665	163264665
4	163263165	163266165
4	163264665	163267665
4	163807665	163810665
4	163809165	163812165
4	164301165	164304165
4	165088551	165091551
4	165091551	165094551
4	165711051	165714051
4	166084551	166087551
4	166086051	166089051
4	166336551	166339551
4	166344051	166347051
4	166345551	166348551
4	166347051	166350051
4	166348551	166351551
4	166350051	166353051
4	166525551	166528551
4	166528551	166531551
4	166530051	166533051
4	167197551	167200551
4	167199051	167202051
4	167212551	167215551
4	167310051	167313051
4	167311551	167314551
4	167322051	167325051
4	168535589	168538589
4	168537089	168540089
4	171594079	171597079
4	171595579	171598579
4	172131079	172134079
4	172132579	172135579
4	172608079	172611079
4	172876579	172879579
4	173658079	173661079
4	173661079	173664079
4	173662579	173665579
4	175317042	175320042
4	175318542	175321542
4	175773042	175776042
4	175776042	175779042
4	175777542	175780542
4	175872042	175875042
4	175873542	175876542
4	175875042	175878042
4	176133042	176136042
4	176952042	176955042
4	176974542	176977542
4	177049592	177052592
4	177231092	177234092
4	177232592	177235592
4	177235592	177238592
4	178651592	178654592
4	178653092	178656092
4	178657592	178660592
4	178659092	178662092
4	179016092	179019092
4	179518592	179521592
4	180061628	180064628
4	180063128	180066128
4	180067628	180070628
[truncated: 4,854 more rows]

## Sheet: SIGNIF_tf0.5_GBR
1	1908088	1911088
1	4596120	4599120
1	4597620	4600620
1	4599120	4602120
1	4600620	4603620
1	9331702	9334702
1	9333202	9336202
1	14370088	14373088
1	14439088	14442088
1	14454088	14457088
1	14455588	14458588
1	14457088	14460088
1	14458588	14461588
1	14460088	14463088
1	14461588	14464588
1	15510088	15513088
1	15574588	15577588
1	15576088	15579088
1	15843105	15846105
1	15910605	15913605
1	16380105	16383105
1	17400105	17403105
1	17401605	17404605
1	17403105	17406105
1	17628105	17631105
1	17649105	17652105
1	17716605	17719605
1	17718105	17721105
1	17719605	17722605
1	18802605	18805605
1	18804105	18807105
1	19173124	19176124
1	19174624	19177624
1	20095624	20098624
1	22359108	22362108
1	22360608	22363608
1	24196608	24199608
1	24198108	24201108
1	24199608	24202608
1	24201108	24204108
1	24202608	24205608
1	24207108	24210108
1	24478608	24481608
1	24531108	24534108
1	24618108	24621108
1	25185282	25188282
1	25186782	25189782
1	30372214	30375214
1	30480214	30483214
1	31062085	31065085
1	31075585	31078585
1	34038416	34041416
1	35262416	35265416
1	35301416	35304416
1	35302916	35305916
1	36862837	36865837
1	39211837	39214837
1	40155093	40158093
1	42090093	42093093
1	42091593	42094593
1	44563663	44566663
1	44565163	44568163
1	46809771	46812771
1	46811271	46814271
1	46812771	46815771
1	46815771	46818771
1	46817271	46820271
1	46823271	46826271
1	49132941	49135941
1	49134441	49137441
1	54156261	54159261
1	56809612	56812612
1	57067612	57070612
1	57069112	57072112
1	57070612	57073612
1	59464753	59467753
1	59466253	59469253
1	59467753	59470753
1	59469253	59472253
1	62125791	62128791
1	62686791	62689791
1	62688291	62691291
1	62760291	62763291
1	64842435	64845435
1	64843935	64846935
1	64845435	64848435
1	66126435	66129435
1	66127935	66130935
1	66132435	66135435
1	66133935	66136935
1	66160935	66163935
1	66165435	66168435
1	66957088	66960088
1	69067588	69070588
1	70975095	70978095
1	71486595	71489595
1	72770595	72773595
1	73554108	73557108
1	73635108	73638108
1	73638108	73641108
1	73857108	73860108
1	73986108	73989108
1	76749433	76752433
1	77104933	77107933
1	77106433	77109433
1	77107933	77110933
1	77109433	77112433
1	77110933	77113933
1	80290601	80293601
1	80512601	80515601
1	80808101	80811101
1	81400601	81403601
1	81402101	81405101
1	82959170	82962170
1	83107670	83110670
1	83143670	83146670
1	83145170	83148170
1	83161670	83164670
1	83164670	83167670
1	84219170	84222170
1	84591170	84594170
1	85449087	85452087
1	85458087	85461087
1	86457087	86460087
1	86458587	86461587
1	87612087	87615087
1	87613587	87616587
1	88512150	88515150
1	88513650	88516650
1	90820650	90823650
1	91642643	91645643
1	93522143	93525143
1	94440150	94443150
1	94441650	94444650
1	94444650	94447650
1	95133150	95136150
1	95148150	95151150
1	95149650	95152650
1	95163150	95166150
1	95194650	95197650
1	99192209	99195209
1	101655083	101658083
1	102376583	102379583
1	102378083	102381083
1	102379583	102382583
1	102411083	102414083
1	102436583	102439583
1	104787085	104790085
1	105112585	105115585
1	105507085	105510085
1	105649585	105652585
1	106046568	106049568
1	106126068	106129068
1	106127568	106130568
1	106129068	106132068
1	108079068	108082068
1	108085068	108088068
1	108244068	108247068
1	108562068	108565068
1	108565068	108568068
1	108566568	108569568
1	108694068	108697068
1	108695568	108698568
1	109366525	109369525
1	109368025	109371025
1	111574525	111577525
1	111580525	111583525
1	111582025	111585025
1	111585025	111588025
1	111828025	111831025
1	111829525	111832525
1	112648806	112651806
1	112650306	112653306
1	112651806	112654806
1	114526806	114529806
1	115720603	115723603
1	117871592	117874592
1	117873092	117876092
1	118350092	118353092
1	118356092	118359092
1	119083592	119086592
1	120084092	120087092
1	120085592	120088592
1	120087092	120090092
1	120331592	120334592
1	120333092	120336092
1	120334592	120337592
1	120336092	120339092
1	146767809	146770809
1	152413710	152416710
1	152607210	152610210
1	152689710	152692710
1	152691210	152694210
1	152692710	152695710
1	152694210	152697210
1	152964210	152967210
1	152965710	152968710
1	152971710	152974710
1	152973210	152976210
1	152974710	152977710
1	152980710	152983710
1	152982210	152985210
1	152983710	152986710
1	153001710	153004710
1	153003210	153006210
1	153006210	153009210
1	153132210	153135210
1	153133710	153136710
1	157129769	157132769
1	157131269	157134269
1	157195769	157198769
1	157203269	157206269
1	157204769	157207769
1	157593269	157596269
1	157594769	157597769
1	157596269	157599269
1	157597769	157600769
1	158163269	158166269
1	158404769	158407769
1	158406269	158409269
1	158490269	158493269
1	158491769	158494769
1	158494769	158497769
1	158496269	158499269
1	158497769	158500769
1	158503769	158506769
1	158505269	158508269
1	158706269	158709269
1	158713769	158716769
1	158715269	158718269
1	158839769	158842769
1	158841269	158844269
1	160932091	160935091
1	162028591	162031591
1	162030091	162033091
1	162106591	162109591
1	162279091	162282091
1	164082091	164085091
1	165643591	165646591
1	165895617	165898617
1	166731117	166734117
1	167124117	167127117
1	167524617	167527617
1	167580117	167583117
1	168856593	168859593
1	169369593	169372593
1	170832093	170835093
1	171798093	171801093
1	171799593	171802593
1	171801093	171804093
1	172449091	172452091
1	172465591	172468591
1	172602091	172605091
1	175054672	175057672
1	175057672	175060672
1	175059172	175062172
1	179272820	179275820
1	179407820	179410820
1	179409320	179412320
1	179437820	179440820
1	179439320	179442320
1	179443820	179446820
1	179446820	179449820
1	179449820	179452820
1	179451320	179454320
1	179452820	179455820
1	179454320	179457320
1	179458820	179461820
1	179686820	179689820
1	181396632	181399632
1	181824132	181827132
1	182053632	182056632
1	182260632	182263632
1	182262132	182265132
1	182508132	182511132
1	182512632	182515632
1	183084132	183087132
1	183085632	183088632
1	183093132	183096132
1	183094632	183097632
1	183096132	183099132
1	183154632	183157632
1	183156132	183159132
1	183159132	183162132
1	183160632	183163632
1	183264132	183267132
1	183295632	183298632
1	183297132	183300132
1	183579132	183582132
1	183580632	183583632
1	183667632	183670632
1	183669132	183672132
1	185524776	185527776
1	185526276	185529276
1	185527776	185530776
1	185566776	185569776
1	185568276	185571276
1	187752116	187755116
1	188229116	188232116
1	188230616	188233616
1	188233616	188236616
1	188241116	188244116
1	188244116	188247116
1	188245616	188248616
1	188247116	188250116
1	188320616	188323616
1	188322116	188325116
1	188323616	188326616
1	188325116	188328116
1	188326616	188329616
1	188434616	188437616
1	188445116	188448116
1	188766116	188769116
1	189616616	189619616
1	189619616	189622616
1	189621116	189624116
1	189643616	189646616
1	189990112	189993112
1	189991612	189994612
1	189999112	190002112
1	190002112	190005112
1	190003612	190006612
1	192579112	192582112
1	192580612	192583612
1	193699729	193702729
1	194385229	194388229
1	194386729	194389729
1	194389729	194392729
1	195042229	195045229
1	195043729	195046729
1	195049729	195052729
1	195057229	195060229
1	195058729	195061729
1	195082729	195085729
1	195084229	195087229
1	195085729	195088729
1	195087229	195090229
1	195088729	195091729
1	195091729	195094729
1	195093229	195096229
1	195094729	195097729
1	195801229	195804229
1	195802729	195805729
1	195804229	195807229
1	195805729	195808729
1	195819229	195822229
1	195820729	195823729
1	195822229	195825229
1	195823729	195826729
1	195825229	195828229
1	195826729	195829729
1	195834107	195837107
1	195835607	195838607
1	195913607	195916607
1	195915107	195918107
1	199356126	199359126
1	200328126	200331126
1	200691126	200694126
1	200692626	200695626
1	201216126	201219126
1	201217626	201220626
1	201472626	201475626
1	201688626	201691626
1	201943622	201946622
1	201945122	201948122
1	201952622	201955622
1	204285122	204288122
1	205302145	205305145
1	205303645	205306645
1	205317145	205320145
1	205374145	205377145
1	205507645	205510645
1	208127306	208130306
1	208128806	208131806
1	208130306	208133306
1	210539306	210542306
1	210695306	210698306
1	210696806	210699806
1	214983097	214986097
1	215188597	215191597
1	215413597	215416597
1	215860597	215863597
1	218856167	218859167
1	219624167	219627167
1	219625667	219628667
1	219627167	219630167
1	220129840	220132840
1	220141840	220144840
1	220143340	220146340
1	221470840	221473840
1	221472340	221475340
1	224257745	224260745
1	224259245	224262245
1	226636604	226639604
1	227479604	227482604
1	228964673	228967673
1	229836173	229839173
1	230236673	230239673
1	230502173	230505173
1	230503673	230506673
1	230505173	230508173
1	230899673	230902673
1	231204173	231207173
1	232773088	232776088
1	233518588	233521588
1	233520088	233523088
1	233521588	233524588
1	233523088	233526088
1	233938588	233941588
1	234585088	234588088
1	234631588	234634588
1	236382132	236385132
1	236383632	236386632
1	236385132	236388132
1	236476632	236479632
1	236478132	236481132
1	236512632	236515632
1	236514132	236517132
1	236518632	236521632
1	236520132	236523132
1	236526132	236529132
1	236527632	236530632
1	236587632	236590632
1	236589132	236592132
1	236590632	236593632
1	236713632	236716632
1	237613632	237616632
1	237615132	237618132
1	237684132	237687132
1	238414627	238417627
1	238416127	238419127
1	238471627	238474627
1	238474627	238477627
1	238627627	238630627
1	238629127	238632127
1	238636627	238639627
1	238852627	238855627
1	238854127	238857127
1	240174127	240177127
1	240177127	240180127
1	240178627	240181627
1	240216127	240219127
1	240217627	240220627
1	240219127	240222127
1	240220627	240223627
1	240225127	240228127
1	240601627	240604627
1	241890156	241893156
1	244516860	244519860
1	244518360	244521360
1	245572860	245575860
1	246432360	246435360
1	246705360	246708360
1	246712860	246715860
1	246714360	246717360
1	247348756	247351756
1	247813756	247816756
1	247815256	247818256
1	248473756	248476756
1	248512756	248515756
1	248514256	248517256
2	613056	616056
2	616056	619056
2	617556	620556
2	622056	625056
2	772056	775056
2	850056	853056
2	857556	860556
2	859056	862056
2	860556	863556
2	1115556	1118556
2	1117056	1120056
2	1118556	1121556
2	1138056	1141056
2	1139556	1142556
2	1141056	1144056
2	1201056	1204056
2	1364556	1367556
2	1367556	1370556
2	1618056	1621056
2	2608056	2611056
2	4859526	4862526
2	6332600	6335600
2	7330100	7333100
2	7630100	7633100
2	7631600	7634600
2	10669077	10672077
2	10670577	10673577
2	10717077	10720077
2	10724577	10727577
2	10730577	10733577
2	10754577	10757577
2	11558577	11561577
2	11560077	11563077
2	11561577	11564577
2	11722077	11725077
2	12310027	12313027
2	12950527	12953527
2	15163065	15166065
2	15164565	15167565
2	15205065	15208065
2	17218065	17221065
2	17450565	17453565
2	18007065	18010065
2	18262129	18265129
2	18263629	18266629
2	18265129	18268129
2	18277129	18280129
2	18608629	18611629
2	18679129	18682129
2	18709129	18712129
2	19693129	19696129
2	19792129	19795129
2	19877629	19880629
2	25126318	25129318
2	25127818	25130818
2	25129318	25132318
2	29173950	29176950
2	29701950	29704950
2	30478130	30481130
2	31270130	31273130
2	31271630	31274630
2	33404603	33407603
2	33964103	33967103
2	33965603	33968603
2	33967103	33970103
2	33991103	33994103
2	34139603	34142603
2	34184603	34187603
2	34586603	34589603
2	35869103	35872103
2	35872103	35875103
2	35873603	35876603
2	35875103	35878103
2	35876603	35879603
2	35878103	35881103
2	35879603	35882603
2	35881103	35884103
2	35882603	35885603
2	35884103	35887103
2	35885603	35888603
2	35887103	35890103
2	35890103	35893103
2	35932103	35935103
2	35933603	35936603
2	35935103	35938103
2	35936603	35939603
2	36131529	36134529
2	37381029	37384029
2	37382529	37385529
2	38054529	38057529
2	38056029	38059029
2	38057529	38060529
2	40610804	40613804
2	41842304	41845304
2	41962304	41965304
2	41963804	41966804
2	41965304	41968304
2	42335524	42338524
2	43013524	43016524
2	43222024	43225024
2	43345024	43348024
2	43882024	43885024
2	43928524	43931524
2	45209539	45212539
2	45211039	45214039
2	45968539	45971539
2	46052539	46055539
2	46054039	46057039
2	46055539	46058539
2	46327039	46330039
2	46487539	46490539
2	49436528	49439528
2	50215028	50218028
2	50216528	50219528
2	50219528	50222528
2	50224028	50227028
2	50225528	50228528
2	51526023	51529023
2	52931523	52934523
2	52999023	53002023
2	57440596	57443596
2	63553132	63556132
2	63554632	63557632
2	65783632	65786632
2	66211008	66214008
2	67346508	67349508
2	68029008	68032008
2	68173008	68176008
2	68569008	68572008
2	68597508	68600508
2	68599008	68602008
2	68600508	68603508
2	68620008	68623008
2	68902008	68905008
2	70862524	70865524
2	70864024	70867024
2	70943524	70946524
2	71048524	71051524
2	71050024	71053024
2	71051524	71054524
2	75038953	75041953
2	75040453	75043453
2	75476953	75479953
2	75650953	75653953
2	76250953	76253953
2	76349953	76352953
2	76358953	76361953
2	76360453	76363453
2	76363453	76366453
2	76364953	76367953
2	76366453	76369453
2	76370953	76373953
2	76741453	76744453
2	76742953	76745953
2	77221453	77224453
2	79160561	79163561
2	79225061	79228061
2	79226561	79229561
2	79228061	79231061
2	79283561	79286561
2	79889561	79892561
2	80143061	80146061
2	82022537	82025537
2	82027037	82030037
2	82028537	82031537
2	82033037	82036037
2	82034537	82037537
2	82039037	82042037
2	82186037	82189037
2	82379537	82382537
2	82387037	82390037
2	83393537	83396537
2	83395037	83398037
2	85924136	85927136
2	85925636	85928636
2	86420636	86423636
2	86422136	86425136
2	101078511	101081511
2	101084511	101087511
2	101245011	101248011
2	101246511	101249511
2	102077575	102080575
2	102178075	102181075
2	102838075	102841075
2	102965575	102968575
2	102967075	102970075
2	102968575	102971575
2	105401508	105404508
2	106145508	106148508
2	106382508	106385508
2	106384008	106387008
2	107677008	107680008
2	108071594	108074594
2	108700094	108703094
2	109931594	109934594
2	113815921	113818921
2	113817421	113820421
2	113820421	113823421
2	114155548	114158548
2	116902048	116905048
2	116903548	116906548
2	116909548	116912548
2	117229045	117232045
2	117230545	117233545
2	117587545	117590545
2	117590545	117593545
2	117592045	117595045
2	121798074	121801074
2	121799574	121802574
2	123842512	123845512
2	124928512	124931512
2	125417512	125420512
2	125464012	125467012
2	125465512	125468512
2	125467012	125470012
2	126155509	126158509
2	126388009	126391009
2	127528009	127531009
2	127546009	127549009
2	129151029	129154029
2	129158529	129161529
2	130405029	130408029
2	130406529	130409529
2	130418529	130421529
2	133158093	133161093
2	133642593	133645593
2	133644093	133647093
2	135404518	135407518
2	135406018	135409018
2	137962018	137965018
2	137963518	137966518
2	137965018	137968018
2	137966518	137969518
2	137968018	137971018
2	137969518	137972518
2	137972518	137975518
2	137978518	137981518
2	137980018	137983018
2	139460771	139463771
2	140164271	140167271
2	140165771	140168771
2	141865019	141868019
2	142091519	142094519
2	142096019	142099019
2	142097519	142100519
2	142229519	142232519
2	142231019	142234019
2	142232519	142235519
2	142622519	142625519
2	150001036	150004036
2	150002536	150005536
2	150005536	150008536
2	150604065	150607065
2	150605565	150608565
2	150611565	150614565
2	150617565	150620565
2	150619065	150622065
2	150620565	150623565
2	150622065	150625065
2	150623565	150626565
2	150625065	150628065
2	151814565	151817565
2	151816065	151819065
2	151825065	151828065
2	155615642	155618642
2	155617142	155620142
2	160583639	160586639
2	160600139	160603139
2	165034047	165037047
2	165043047	165046047
2	166904547	166907547
2	166906047	166909047
2	166909047	166912047
2	166915047	166918047
2	166916547	166919547
2	166918047	166921047
2	166999047	167002047
2	167000547	167003547
2	167165547	167168547
2	167450547	167453547
2	170525137	170528137
2	170631637	170634637
2	170636137	170639137
2	170988637	170991637
2	171148294	171151294
2	171170794	171173794
2	171581794	171584794
2	172373794	172376794
2	175564001	175567001
2	175597001	175600001
2	176623001	176626001
2	176674001	176677001
2	179236072	179239072
2	186994053	186997053
2	191224017	191227017
2	191227017	191230017
2	192163067	192166067
2	192164567	192167567
2	192166067	192169067
2	193729067	193732067
2	193730567	193733567
2	193732067	193735067
2	193733567	193736567
2	194366567	194369567
2	194371067	194374067
2	198142010	198145010
2	206038086	206041086
2	208966004	208969004
2	208973504	208976504
2	210116636	210119636
2	210118136	210121136
2	210256136	210259136
2	211852136	211855136
2	211853636	211856636
2	211856636	211859636
2	211859636	211862636
2	213076077	213079077
2	214718577	214721577
2	214720077	214723077
2	214721577	214724577
2	214724577	214727577
2	214735077	214738077
2	214736577	214739577
2	214759077	214762077
2	215630577	215633577
2	215632077	215635077
2	216418097	216421097
2	217267097	217270097
2	218708597	218711597
2	218710097	218713097
2	218711597	218714597
2	219658036	219661036
2	220573036	220576036
2	220579036	220582036
2	220834036	220837036
2	220835536	220838536
2	220840036	220843036
2	220961536	220964536
2	220963036	220966036
2	222217115	222220115
2	222976115	222979115
2	226022531	226025531
2	226024031	226027031
2	226025531	226028531
2	226028531	226031531
2	226034531	226037531
2	226036031	226039031
2	226048031	226051031
2	226049531	226052531
2	226051031	226054031
2	226052531	226055531
2	227891531	227894531
2	227921531	227924531
2	228091128	228094128
2	228092628	228095628
2	228466128	228469128
2	228467628	228470628
2	229909128	229912128
2	230960628	230963628
2	230996628	230999628
2	231257596	231260596
2	231326596	231329596
2	231328096	231331096
2	231329596	231332596
2	231332596	231335596
2	231427096	231430096
2	231428596	231431596
2	231430096	231433096
2	231437596	231440596
2	231878596	231881596
2	232388596	232391596
2	234059233	234062233
2	234060733	234063733
2	234066733	234069733
2	234588733	234591733
2	234591733	234594733
2	234593233	234596233
2	234594733	234597733
2	234596233	234599233
2	235269733	235272733
2	235506733	235509733
2	235509733	235512733
2	236672233	236675233
2	238211778	238214778
2	238535778	238538778
2	238538778	238541778
2	239006778	239009778
2	239488278	239491278
2	239489778	239492778
2	239830278	239833278
2	241018012	241021012
2	241019512	241022512
2	241118512	241121512
2	241340512	241343512
2	241829512	241832512
2	241832512	241835512
2	241840012	241843012
3	1512678	1515678
3	1514178	1517178
3	1848678	1851678
3	1850178	1853178
3	1901178	1904178
3	1902678	1905678
3	1907178	1910178
3	1908678	1911678
3	1932678	1935678
3	2954178	2957178
3	2955678	2958678
3	2958678	2961678
3	2960178	2963178
3	3749065	3752065
3	3750565	3753565
3	3981565	3984565
3	3983065	3986065
3	3986065	3989065
3	3987565	3990565
3	4013065	4016065
3	4730065	4733065
3	5714065	5717065
3	5954065	5957065
3	5955565	5958565
3	7128513	7131513
3	7130013	7133013
3	7365513	7368513
3	7370013	7373013
3	7620513	7623513
3	7923513	7926513
3	7925013	7928013
3	7940013	7943013
3	7982013	7985013
3	7983513	7986513
3	7985013	7988013
3	8619513	8622513
3	8963013	8966013
3	11034711	11037711
3	11036211	11039211
3	13109008	13112008
3	13110508	13113508
3	13112008	13115008
3	13193008	13196008
3	13475008	13478008
3	13476508	13479508
3	14289508	14292508
3	14291008	14294008
3	14328508	14331508
3	14343508	14346508
3	14570008	14573008
3	16007010	16010010
3	16008510	16011510
3	16011510	16014510
3	16182510	16185510
3	16184010	16187010
3	16185510	16188510
3	16367010	16370010
3	18818070	18821070
3	18819570	18822570
3	20505570	20508570
3	20507070	20510070
3	20511570	20514570
3	20513070	20516070
3	21485214	21488214
3	21486714	21489714
3	21491214	21494214
3	21492714	21495714
3	21743214	21746214
3	21959214	21962214
3	21960714	21963714
3	22721214	22724214
3	22950714	22953714
3	23973714	23976714
3	23975214	23978214
3	26502543	26505543
3	26504043	26507043
3	26549043	26552043
3	26615043	26618043
3	26775543	26778543
3	26777043	26780043
3	27662041	27665041
3	28149541	28152541
3	28151041	28154041
3	29727541	29730541
3	30135536	30138536
3	30251036	30254036
3	31167536	31170536
3	31775036	31778036
3	31776536	31779536
3	32205536	32208536
3	32207036	32210036
3	32454536	32457536
3	32661536	32664536
3	32663036	32666036
3	32664536	32667536
3	34712029	34715029
3	34721029	34724029
3	36152053	36155053
3	36153553	36156553
3	36155053	36158053
3	36156553	36159553
3	36422053	36425053
3	37577053	37580053
3	39446011	39449011
3	39447511	39450511
3	39531511	39534511
3	39953011	39956011
3	39954511	39957511
3	39971011	39974011
3	39974011	39977011
3	40094011	40097011
3	40095511	40098511
3	40097011	40100011
3	40103011	40106011
3	40104511	40107511
3	40106011	40109011
3	41049511	41052511
3	41102011	41105011
3	41525011	41528011
3	41585011	41588011
3	41586511	41589511
3	41594011	41597011
3	41597011	41600011
3	41598511	41601511
3	42366587	42369587
3	42368087	42371087
3	42369587	42372587
3	42371087	42374087
3	42372587	42375587
3	45221019	45224019
3	54327550	54330550
3	55737550	55740550
3	56760550	56763550
3	59475529	59478529
3	60102522	60105522
3	60105522	60108522
3	60108522	60111522
3	60110022	60113022
3	60807522	60810522
3	61047522	61050522
3	61049022	61052022
3	61050522	61053522
3	61052022	61055022
3	62684022	62687022
3	62724522	62727522
3	63273562	63276562
3	63614062	63617062
3	67653562	67656562
3	67655062	67658062
3	67656562	67659562
3	67658062	67661062
3	67659562	67662562
3	69411869	69414869
3	69414869	69417869
3	69552869	69555869
3	69843869	69846869
3	69879869	69882869
3	70347869	70350869
3	72027869	72030869
3	72029369	72032369
3	74774063	74777063
3	74783063	74786063
3	75599072	75602072
3	75600572	75603572
3	75602072	75605072
3	75603572	75606572
3	75605072	75608072
3	76116572	76119572
3	76119572	76122572
3	76674572	76677572
3	76985072	76988072
3	76986572	76989572
3	77601572	77604572
3	77603072	77606072
3	82540569	82543569
3	83923569	83926569
3	84509418	84512418
3	85574418	85577418
3	85575918	85578918
3	85583418	85586418
3	85584918	85587918
3	85593918	85596918
3	85595418	85598418
3	85596918	85599918
3	85598418	85601418
3	86525418	86528418
3	86529918	86532918
3	86750418	86753418
3	86751918	86754918
3	87344059	87347059
3	87345559	87348559
3	87347059	87350059
3	87357559	87360559
3	88536559	88539559
3	88538059	88541059
3	94204955	94207955
3	94206455	94209455
3	95149955	95152955
3	95151455	95154455
3	95154455	95157455
3	95158955	95161955
3	95163455	95166455
3	95164955	95167955
3	95167955	95170955
3	95169455	95172455
3	95170955	95173955
3	95172455	95175455
3	95173955	95176955
3	95175455	95178455
3	95178455	95181455
3	95179955	95182955
3	95182955	95185955
3	96036455	96039455
3	96037955	96040955
3	97784065	97787065
3	97788565	97791565
3	97790065	97793065
3	97791565	97794565
3	97793065	97796065
3	97799065	97802065
3	97833565	97836565
3	97838065	97841065
3	97839565	97842565
3	97890565	97893565
3	97892065	97895065
3	97896565	97899565
3	97898065	97901065
3	97899565	97902565
3	97902565	97905565
3	97904065	97907065
3	97905565	97908565
3	97907065	97910065
3	97919065	97922065
3	97920565	97923565
3	97934065	97937065
3	97935565	97938565
3	97937065	97940065
3	97938565	97941565
3	97940065	97943065
3	97941565	97944565
3	97983565	97986565
3	98282065	98285065
3	98720065	98723065
3	98721565	98724565
3	98724565	98727565
3	98726065	98729065
3	98727565	98730565
3	98733565	98736565
3	98736565	98739565
3	98742565	98745565
3	98744065	98747065
3	98745565	98748565
3	98747065	98750065
3	98753065	98756065
3	100788504	100791504
3	100809504	100812504
3	100811004	100814004
3	101976504	101979504
3	101982504	101985504
3	102813665	102816665
3	102815165	102818165
3	102818165	102821165
3	103451165	103454165
3	103466165	103469165
3	103467665	103470665
3	103818665	103821665
3	103937165	103940165
3	104237165	104240165
3	104238665	104241665
3	104412665	104415665
3	104415665	104418665
3	104417165	104420165
3	104418665	104421665
3	104666165	104669165
3	104802665	104805665
3	104804165	104807165
3	105694583	105697583
3	107701583	107704583
3	108061583	108064583
3	108063083	108066083
3	108064583	108067583
3	108066083	108069083
3	108566109	108569109
3	108876609	108879609
3	109647609	109650609
3	109650609	109653609
3	109652109	109655109
3	109653609	109656609
3	109719609	109722609
3	110994609	110997609
3	110996109	110999109
3	111035109	111038109
3	111036609	111039609
3	111038109	111041109
3	111738692	111741692
3	111741692	111744692
3	111743192	111746192
3	111923192	111926192
3	111927692	111930692
3	111941192	111944192
3	111948692	111951692
3	111950192	111953192
3	111956192	111959192
3	111971192	111974192
3	112025192	112028192
3	112500692	112503692
3	112841192	112844192
3	112842692	112845692
3	112844192	112847192
3	115107590	115110590
3	115110590	115113590
3	115116590	115119590
3	116324090	116327090
3	119411107	119414107
3	121632123	121635123
3	121639623	121642623
3	121641123	121644123
3	121642623	121645623
3	121644123	121647123
3	121645623	121648623
3	122299623	122302623
3	122301123	122304123
3	123097623	123100623
3	123101070	123104070
3	123102570	123105570
3	123104070	123107070
3	124298070	124301070
3	124299570	124302570
3	124304070	124307070
3	124305570	124308570
3	124320570	124323570
3	124340070	124343070
3	124377570	124380570
3	124691070	124694070
3	124692570	124695570
3	125844570	125847570
3	125846070	125849070
3	125847570	125850570
3	125849070	125852070
3	125856570	125859570
3	125858070	125861070
3	125943570	125946570
3	125945070	125948070
3	125946570	125949570
3	125948070	125951070
3	125949570	125952570
3	125951070	125954070
3	125952570	125955570
3	126020070	126023070
3	129062020	129065020
3	129063520	129066520
3	131385689	131388689
3	131594189	131597189
3	131597189	131600189
3	131598689	131601689
3	131600189	131603189
3	131601689	131604689
3	131603189	131606189
3	131604689	131607689
3	131645189	131648189
3	131646689	131649689
3	131675189	131678189
3	131676689	131679689
3	131813189	131816189
3	131937689	131940689
3	132066689	132069689
3	132071189	132074189
3	132072689	132075689
3	132074189	132077189
3	132556160	132559160
3	132557660	132560660
3	132559160	132562160
3	132652160	132655160
3	132685160	132688160
3	134150660	134153660
3	134152160	134155160
3	134678660	134681660
3	136856243	136859243
3	136857743	136860743
3	136866743	136869743
3	137075243	137078243
3	137153243	137156243
3	139698586	139701586
3	139700086	139703086
3	142602502	142605502
3	143420002	143423002
3	143675002	143678002
3	143676502	143679502
3	143678002	143681002
3	143681002	143684002
3	143684002	143687002
3	143685502	143688502
3	144893037	144896037
3	145229037	145232037
3	145233537	145236537
3	145235037	145238037
3	145236537	145239537
3	145238037	145241037
3	145737537	145740537
3	145739037	145742037
3	145740537	145743537
3	145742037	145745037
3	146361537	146364537
3	147414672	147417672
3	147827172	147830172
3	148613172	148616172
3	148614672	148617672
3	148616172	148619172
3	148619172	148622172
3	148622172	148625172
3	149388672	149391672
3	149397672	149400672
3	149399172	149402172
3	149880672	149883672
3	151223034	151226034
3	153494123	153497123
3	153495623	153498623
3	153680123	153683123
3	153729623	153732623
3	153731123	153734123
3	155346623	155349623
3	161157699	161160699
3	161778699	161781699
3	161808699	161811699
3	161810199	161813199
3	161811699	161814699
3	161813199	161816199
3	161814699	161817699
3	162236492	162239492
3	162237992	162240992
3	162702992	162705992
3	162722492	162725492
3	162723992	162726992
3	162725492	162728492
3	162726992	162729992
3	162729992	162732992
3	162731492	162734492
3	162732992	162735992
3	162749492	162752492
3	162750992	162753992
3	162755492	162758492
3	163743992	163746992
3	164090492	164093492
3	164115992	164118992
3	164117492	164120492
3	164118992	164121992
3	164120492	164123492
3	164127992	164130992
3	164129492	164132492
3	164145992	164148992
3	164180492	164183492
3	164181992	164184992
3	164184992	164187992
3	164186492	164189492
3	165456576	165459576
3	165458076	165461076
3	165459576	165462576
3	165960576	165963576
3	165968076	165971076
3	166037076	166040076
3	171014431	171017431
3	171440038	171443038
3	171801538	171804538
3	172221538	172224538
3	172223038	172226038
3	174483616	174486616
3	174485116	174488116
3	174486616	174489616
3	174488116	174491116
3	175004116	175007116
3	175011616	175014616
3	176513116	176516116
3	176597116	176600116
3	176607616	176610616
3	177294542	177297542
3	177296042	177299042
3	177297542	177300542
3	177299042	177302042
3	177306542	177309542
3	178542542	178545542
3	178544042	178547042
3	178565042	178568042
3	178973042	178976042
3	179670542	179673542
3	183177806	183180806
3	183179306	183182306
3	183180806	183183806
3	184125806	184128806
3	184763306	184766306
3	184764806	184767806
3	184766306	184769306
3	184767806	184770806
3	184769306	184772306
3	184778306	184781306
3	186434163	186437163
3	186435663	186438663
3	186437163	186440163
3	186438663	186441663
3	186440163	186443163
3	189246505	189249505
3	189248005	189251005
3	189533005	189536005
3	189873505	189876505
3	189875005	189878005
3	190568005	190571005
3	190890505	190893505
3	190892005	190895005
3	190977505	190980505
3	190998505	191001505
3	191177005	191180005
3	191180005	191183005
3	191181505	191184505
3	191186005	191189005
3	192369612	192372612
3	192452112	192455112
3	192587112	192590112
3	192590112	192593112
3	192591612	192594612
3	192617112	192620112
3	194265612	194268612
3	194316612	194319612
3	194318112	194321112
3	194405112	194408112
3	194669112	194672112
3	196052109	196055109
4	780928	783928
4	782428	785428
4	822928	825928
4	1277428	1280428
4	4242134	4245134
4	4243634	4246634
4	4245134	4248134
4	4671134	4674134
4	4672634	4675634
4	4674134	4677134
4	4686134	4689134
4	5965634	5968634
4	7317081	7320081
4	7320081	7323081
4	7321581	7324581
4	7431081	7434081
4	9192518	9195518
4	9197018	9200018
4	9950018	9953018
4	9951518	9954518
4	9953018	9956018
4	9954518	9957518
4	9956018	9959018
4	9957518	9960518
4	9965018	9968018
4	10724018	10727018
4	10725518	10728518
4	11634518	11637518
4	12079548	12082548
4	12085548	12088548
4	12090048	12093048
4	14872548	14875548
4	16416090	16419090
4	16417590	16420590
4	16419090	16422090
4	16420590	16423590
4	17307090	17310090
4	17695590	17698590
4	18748720	18751720
4	18750220	18753220
4	20851720	20854720
4	23593644	23596644
4	23595144	23598144
4	23596644	23599644
4	23601144	23604144
4	23602644	23605644
4	23607144	23610144
4	24670621	24673621
4	25000621	25003621
4	25023121	25026121
4	27780106	27783106
4	27781606	27784606
4	28227106	28230106
4	28237606	28240606
4	28242106	28245106
4	28243606	28246606
4	28623106	28626106
4	28918606	28921606
4	28933606	28936606
4	28981606	28984606
4	31335494	31338494
4	31336994	31339994
4	31588994	31591994
4	31590494	31593494
4	31591994	31594994
4	32184494	32187494
4	32199494	32202494
4	32200994	32203994
4	32656994	32659994
4	32677994	32680994
4	32853494	32856494
4	35494619	35497619
4	35496119	35499119
4	35505119	35508119
4	35506619	35509619
4	35508119	35511119
4	35509619	35512619
4	35511119	35514119
4	35512619	35515619
4	35514119	35517119
4	35515619	35518619
4	35517119	35520119
4	35518619	35521619
4	36445539	36448539
4	36447039	36450039
4	36570039	36573039
4	36618039	36621039
4	36621039	36624039
4	36622539	36625539
4	36624039	36627039
4	36625539	36628539
4	36627039	36630039
4	36628539	36631539
4	36630039	36633039
4	37512039	37515039
4	37524039	37527039
4	37560039	37563039
4	37561539	37564539
4	37563039	37566039
4	37800039	37803039
4	37801539	37804539
4	37803039	37806039
4	38194539	38197539
4	38590539	38593539
4	38875539	38878539
4	38991039	38994039
4	38992539	38995539
4	39108044	39111044
4	39109544	39112544
4	39114044	39117044
4	39115544	39118544
4	39117044	39120044
4	39118544	39121544
4	39120044	39123044
4	42609463	42612463
4	42738463	42741463
4	42739963	42742963
4	42741463	42744463
4	42753463	42756463
4	44661463	44664463
4	44662963	44665963
4	44868463	44871463
4	45069928	45072928
4	45071428	45074428
4	47547928	47550928
4	47549428	47552428
4	47555428	47558428
4	47624428	47627428
4	48171046	48174046
4	48172546	48175546
4	48174046	48177046
4	48175546	48178546
4	48177046	48180046
4	53130441	53133441
4	54471149	54474149
4	54472649	54475649
4	54474149	54477149
4	55347149	55350149
4	55687649	55690649
4	55689149	55692149
4	56023649	56026649
4	56025149	56028149
4	56305649	56308649
4	56379149	56382149
4	56380649	56383649
4	57127631	57130631
4	57129131	57132131
4	57556631	57559631
4	57702131	57705131
4	57916631	57919631
4	57918131	57921131
4	58567631	58570631
4	58569131	58572131
4	58570631	58573631
4	58720631	58723631
4	58959131	58962131
4	59196131	59199131
4	59355131	59358131
4	59356631	59359631
4	59607131	59610131
4	59608631	59611631
4	59610131	59613131
4	59668631	59671631
4	59950631	59953631
4	60841656	60844656
4	61368156	61371156
4	63235559	63238559
4	63429059	63432059
4	64503059	64506059
4	64849559	64852559
4	65422559	65425559
4	65508059	65511059
4	65509559	65512559
4	65536559	65539559
4	66718575	66721575
4	66750075	66753075
4	66751575	66754575
4	66993075	66996075
4	66997575	67000575
4	67300575	67303575
4	68451075	68454075
4	69347015	69350015
4	69348515	69351515
4	69350015	69353015
4	69366515	69369515
4	69609515	69612515
4	69959015	69962015
4	70386515	70389515
4	70388015	70391015
4	70389515	70392515
4	70391015	70394015
4	70395515	70398515
4	70413515	70416515
4	70418015	70421015
4	71126015	71129015
4	71208515	71211515
4	71210015	71213015
4	71211515	71214515
4	71213015	71216015
4	71214515	71217515
4	71250515	71253515
4	71366015	71369015
4	71382515	71385515
4	71384015	71387015
4	71385515	71388515
4	71387015	71390015
4	72471402	72474402
4	73627902	73630902
4	73629402	73632402
4	73630902	73633902
4	73639902	73642902
4	74451402	74454402
4	75421613	75424613
4	76194113	76197113
4	76302113	76305113
4	76950113	76953113
4	76951613	76954613
4	76953113	76956113
4	76954613	76957613
4	76956113	76959113
4	76960613	76963613
4	76962113	76965113
4	76969613	76972613
4	76971113	76974113
4	76972613	76975613
4	77029613	77032613
4	77031113	77034113
4	77037113	77040113
4	77038613	77041613
4	77041613	77044613
4	77061113	77064113
4	77062613	77065613
4	77065613	77068613
4	77067113	77070113
4	77148113	77151113
4	77194613	77197613
4	77455613	77458613
4	77467613	77470613
4	77910113	77913113
4	77911613	77914613
4	77913113	77916113
4	77914613	77917613
4	78234199	78237199
4	78249199	78252199
4	78258199	78261199
4	78346699	78349699
4	78988699	78991699
4	79384699	79387699
4	79386199	79389199
4	79420699	79423699
4	79426699	79429699
4	79428199	79431199
4	79429699	79432699
4	79437199	79440199
4	79449199	79452199
4	80614699	80617699
4	80806699	80809699
4	80808199	80811199
4	82269115	82272115
4	82270615	82273615
4	82734115	82737115
4	82858615	82861615
4	82860115	82863115
4	82866115	82869115
4	83553115	83556115
4	84528083	84531083
4	84804083	84807083
4	84805583	84808583
4	84825083	84828083
4	84826583	84829583
4	85027583	85030583
4	86572583	86575583
4	86574083	86577083
4	88386325	88389325
4	88453825	88456825
4	89853325	89856325
4	89899825	89902825
4	89976325	89979325
4	90163593	90166593
4	90165093	90168093
4	90166593	90169593
4	91719093	91722093
4	92278593	92281593
4	92280093	92283093
4	92281593	92284593
4	93504078	93507078
4	94803078	94806078
4	95763078	95766078
4	95770578	95773578
4	95772078	95775078
4	95773578	95776578
4	96726179	96729179
4	97423679	97426679
4	97425179	97428179
4	97426679	97429679
4	97428179	97431179
4	97429679	97432679
4	97431179	97434179
4	97432679	97435679
4	97434179	97437179
4	98259179	98262179
4	98935679	98938679
4	98937179	98940179
4	98982179	98985179
4	99012143	99015143
4	99015143	99018143
4	99018143	99021143
4	99019643	99022643
4	99022643	99025643
4	99024143	99027143
4	99027143	99030143
4	99028643	99031643
4	99031643	99034643
4	99037643	99040643
4	99039143	99042143
4	99043643	99046643
4	99046643	99049643
4	99048143	99051143
4	99054143	99057143
4	99055643	99058643
4	99064643	99067643
4	99441143	99444143
4	99465143	99468143
4	99661643	99664643
4	99675143	99678143
4	99787643	99790643
4	100044143	100047143
4	100057643	100060643
4	100059143	100062143
4	100060643	100063643
4	100260143	100263143
4	100261643	100264643
4	100263143	100266143
4	100264643	100267643
4	100266143	100269143
4	101445143	101448143
4	101446643	101449643
4	101493143	101496143
4	101497643	101500643
4	101505143	101508143
4	101506643	101509643
4	102475643	102478643
4	102477143	102480143
4	102723143	102726143
4	103153643	103156643
4	103168643	103171643
4	103551143	103554143
4	103552643	103555643
4	103554143	103557143
4	103555643	103558643
4	106312597	106315597
4	106908097	106911097
4	109480656	109483656
4	109482156	109485156
4	109942656	109945656
4	109944156	109947156
4	110151156	110154156
4	110152656	110155656
4	112762666	112765666
4	113347666	113350666
4	114012073	114015073
4	114018073	114021073
4	114019573	114022573
4	114769573	114772573
4	114784573	114787573
4	115014073	115017073
4	115374073	115377073
4	115375573	115378573
4	115377073	115380073
4	115378573	115381573
4	115386073	115389073
4	115411573	115414573
4	115413073	115416073
4	115414573	115417573
4	115431073	115434073
4	115432573	115435573
4	115452073	115455073
4	115453573	115456573
4	116086573	116089573
4	116172073	116175073
4	116176573	116179573
4	116373073	116376073
4	116374573	116377573
4	116376073	116379073
4	116377573	116380573
4	116386573	116389573
4	116388073	116391073
4	116391073	116394073
4	116407573	116410573
4	116452573	116455573
4	116505073	116508073
4	116506573	116509573
4	116509573	116512573
4	116511073	116514073
4	116916073	116919073
4	117886604	117889604
4	118159604	118162604
4	118707104	118710104
4	120007604	120010604
4	120024116	120027116
4	120048116	120051116
4	120235616	120238616
4	120237116	120240116
4	120240116	120243116
4	121401116	121404116
4	121516616	121519616
4	121575116	121578116
4	121576616	121579616
4	121713116	121716116
4	121714616	121717616
4	122664116	122667116
4	122881616	122884616
4	122883116	122886116
4	123520544	123523544
4	124477544	124480544
4	127818044	127821044
4	130072162	130075162
4	131050162	131053162
4	131252662	131255662
4	131254162	131257162
4	131255662	131258662
4	131596162	131599162
4	131845162	131848162
4	132970569	132973569
4	133032069	133035069
4	133111569	133114569
4	133551069	133554069
4	133848069	133851069
4	133849569	133852569
4	133851069	133854069
4	134530569	134533569
4	135771046	135774046
4	135774046	135777046
4	135898546	135901546
4	136141546	136144546
4	137401546	137404546
4	137403046	137406046
4	137739046	137742046
4	137940046	137943046
4	137947546	137950546
4	137950546	137953546
4	137964046	137967046
4	138162062	138165062
4	138163562	138166562
4	138165062	138168062
4	139117562	139120562
4	139119062	139122062
4	139486562	139489562
4	139488062	139491062
4	141834113	141837113
4	142074113	142077113
4	143013113	143016113
4	143940113	143943113
4	143941613	143944613
4	144049655	144052655
4	144051155	144054155
4	144654155	144657155
4	144655655	144658655
4	144657155	144660155
4	144658655	144661655
4	144672155	144675155
4	145197155	145200155
4	145201655	145204655
4	148510573	148513573
4	148516573	148519573
4	152604928	152607928
4	152606428	152609428
4	154513650	154516650
4	154519650	154522650
4	154746150	154749150
4	154893150	154896150
4	154894650	154897650
4	155410650	155413650
4	155766150	155769150
4	155769150	155772150
4	156099072	156102072
4	156108072	156111072
4	157507572	157510572
4	157509072	157512072
4	159359443	159362443
4	159360943	159363943
4	159365443	159368443
4	159366943	159369943
4	159368443	159371443
4	159371443	159374443
4	159377443	159380443
4	159381943	159384943
4	160554943	160557943
4	160556443	160559443
4	162012165	162015165
4	162013665	162016665
4	162015165	162018165
4	162030165	162033165
4	162031665	162034665
4	162225165	162228165
4	162226665	162229665
4	163263165	163266165
4	163264665	163267665
4	163807665	163810665
4	163809165	163812165
4	165711051	165714051
4	165726051	165729051
4	166338051	166341051
4	166344051	166347051
4	166345551	166348551
4	166347051	166350051
4	166348551	166351551
4	166350051	166353051
4	167410551	167413551
4	172876579	172879579
4	175773042	175776042
4	175774542	175777542
4	175776042	175779042
4	175810542	175813542
4	175812042	175815042
4	176994042	176997042
4	177228092	177231092
4	177229592	177232592
4	177262592	177265592
4	177438092	177441092
4	179020592	179023592
4	180067628	180070628
4	180069128	180072128
4	180138128	180141128
4	180409628	180412628
4	180502628	180505628
4	181315628	181318628
4	181317128	181320128
4	181468628	181471628
4	181470128	181473128
4	182278628	182281628
4	183352559	183355559
4	183808559	183811559
4	184291559	184294559
4	184293059	184296059
4	185748059	185751059
4	185778059	185781059
4	185806559	185809559
4	185808059	185811059
4	185905559	185908559
4	185907059	185910059
4	185908559	185911559
4	185910059	185913059
4	186798111	186801111
4	187099611	187102611
4	187369611	187372611
4	187371111	187374111
4	188608611	188611611
4	188928111	188931111
4	188929611	188932611
4	188932611	188935611
4	189241953	189244953
4	189243453	189246453
4	189249453	189252453
4	189583953	189586953
4	189586953	189589953
4	189589953	189592953
4	189591453	189594453
4	189834453	189837453
4	189849453	189852453
4	189850953	189853953
4	189852453	189855453
4	189853953	189856953
4	189856953	189859953
4	189858453	189861453
4	189960453	189963453
4	190294953	190297953
4	190297953	190300953
4	190311453	190314453
5	477066	480066
5	2089566	2092566
5	2337066	2340066
5	2782566	2785566
5	2787066	2790066
5	2946066	2949066
5	3637469	3640469
5	4022969	4025969
5	5089469	5092469
5	5090969	5093969
5	5140469	5143469
5	5417969	5420969
5	5735969	5738969
5	5737469	5740469
5	6209881	6212881
5	6211381	6214381
5	6217381	6220381
5	7559881	7562881
5	7925881	7928881
5	7991881	7994881
5	7999381	8002381
5	8000881	8003881
5	8002381	8005381
5	8014381	8017381
5	8015881	8018881
5	8017381	8020381
5	8018881	8021881
5	8020381	8023381
5	8021881	8024881
5	8023381	8026381
5	8105881	8108881
5	8531881	8534881
5	8554381	8557381
5	8569381	8572381
5	8726881	8729881
5	8728381	8731381
5	8737381	8740381
5	8738881	8741881
5	8740381	8743381
5	8827381	8830381
5	8828881	8831881
5	8830381	8833381
5	8941381	8944381
5	10630569	10633569
5	10632069	10635069
5	10950069	10953069
5	10951569	10954569
5	13013923	13016923
[truncated: 4,519 more rows]

## Sheet: SIGNIF_tf0.5_TSI
1	4597620	4600620
1	4599120	4602120
1	5307120	5310120
1	5353620	5356620
1	12612103	12615103
1	14370088	14373088
1	14371588	14374588
1	14452588	14455588
1	14454088	14457088
1	14455588	14458588
1	14457088	14460088
1	14458588	14461588
1	14461588	14464588
1	15364588	15367588
1	15510088	15513088
1	15513088	15516088
1	15574588	15577588
1	15907605	15910605
1	16380105	16383105
1	16428105	16431105
1	17400105	17403105
1	17401605	17404605
1	17421105	17424105
1	17422605	17425605
1	17628105	17631105
1	17649105	17652105
1	17655105	17658105
1	17716605	17719605
1	17718105	17721105
1	18802605	18805605
1	18804105	18807105
1	18828105	18831105
1	19173124	19176124
1	22359108	22362108
1	22360608	22363608
1	22959108	22962108
1	24196608	24199608
1	24198108	24201108
1	24199608	24202608
1	24201108	24204108
1	24207108	24210108
1	30369214	30372214
1	30372214	30375214
1	30373714	30376714
1	31074085	31077085
1	31075585	31078585
1	31947085	31950085
1	34038416	34041416
1	35302916	35305916
1	39216337	39219337
1	40153593	40156593
1	44050663	44053663
1	44563663	44566663
1	46809771	46812771
1	46811271	46814271
1	46817271	46820271
1	48964941	48967941
1	56154112	56157112
1	56809612	56812612
1	57067612	57070612
1	57069112	57072112
1	59466253	59469253
1	59467753	59470753
1	62124291	62127291
1	62125791	62128791
1	62494791	62497791
1	62688291	62691291
1	63412791	63415791
1	64624935	64627935
1	64843935	64846935
1	66130935	66133935
1	66132435	66135435
1	66957088	66960088
1	67800088	67803088
1	67849588	67852588
1	68871088	68874088
1	70975095	70978095
1	71486595	71489595
1	71488095	71491095
1	73638108	73641108
1	73851108	73854108
1	74337108	74340108
1	76749433	76752433
1	76755433	76758433
1	77104933	77107933
1	77106433	77109433
1	77107933	77110933
1	77109433	77112433
1	77110933	77113933
1	79845101	79848101
1	80512601	80515601
1	80806601	80809601
1	80808101	80811101
1	80809601	80812601
1	83106170	83109170
1	83107670	83110670
1	83143670	83146670
1	83145170	83148170
1	83161670	83164670
1	83163170	83166170
1	83164670	83167670
1	83166170	83169170
1	84172670	84175670
1	85449087	85452087
1	86457087	86460087
1	86458587	86461587
1	86460087	86463087
1	86479587	86482587
1	86481087	86484087
1	86896587	86899587
1	86898087	86901087
1	86899587	86902587
1	88513650	88516650
1	93520643	93523643
1	94440150	94443150
1	94444650	94447650
1	95146650	95149650
1	95148150	95151150
1	95149650	95152650
1	95163150	95166150
1	95164650	95167650
1	97098209	97101209
1	99192209	99195209
1	101281583	101284583
1	101653583	101656583
1	101655083	101658083
1	101847083	101850083
1	102376583	102379583
1	102378083	102381083
1	102381083	102384083
1	102436583	102439583
1	103615585	103618585
1	105111085	105114085
1	105235585	105238585
1	105237085	105240085
1	105498085	105501085
1	105499585	105502585
1	105501085	105504085
1	105505585	105508585
1	105507085	105510085
1	106045068	106048068
1	106046568	106049568
1	106048068	106051068
1	106124568	106127568
1	106127568	106130568
1	106129068	106132068
1	108079068	108082068
1	108085068	108088068
1	108562068	108565068
1	108565068	108568068
1	108566568	108569568
1	108694068	108697068
1	108695568	108698568
1	109366525	109369525
1	109368025	109371025
1	111393025	111396025
1	111405025	111408025
1	111574525	111577525
1	111580525	111583525
1	111582025	111585025
1	111583525	111586525
1	111795025	111798025
1	111828025	111831025
1	111829525	111832525
1	112648806	112651806
1	112650306	112653306
1	112651806	112654806
1	112653306	112656306
1	114526806	114529806
1	114528306	114531306
1	117873092	117876092
1	118350092	118353092
1	118351592	118354592
1	119083592	119086592
1	119092592	119095592
1	120084092	120087092
1	120085592	120088592
1	120087092	120090092
1	120162092	120165092
1	120163592	120166592
1	120331592	120334592
1	120333092	120336092
1	120334592	120337592
1	120343592	120346592
1	146767809	146770809
1	152590710	152593710
1	152689710	152692710
1	152691210	152694210
1	152692710	152695710
1	152694210	152697210
1	152964210	152967210
1	152970210	152973210
1	152971710	152974710
1	152973210	152976210
1	152980710	152983710
1	152982210	152985210
1	152983710	152986710
1	152985210	152988210
1	153001710	153004710
1	153003210	153006210
1	153042210	153045210
1	153133710	153136710
1	157194269	157197269
1	157195769	157198769
1	157203269	157206269
1	157204769	157207769
1	157594769	157597769
1	157596269	157599269
1	157597769	157600769
1	158406269	158409269
1	158463269	158466269
1	158490269	158493269
1	158491769	158494769
1	158494769	158497769
1	158496269	158499269
1	158497769	158500769
1	158505269	158508269
1	158706269	158709269
1	158713769	158716769
1	158715269	158718269
1	160146091	160149091
1	160348591	160351591
1	165643591	165646591
1	165894117	165897117
1	167451117	167454117
1	167524617	167527617
1	167580117	167583117
1	169530093	169533093
1	170824593	170827593
1	170830593	170833593
1	170832093	170835093
1	171799593	171802593
1	172449091	172452091
1	175057672	175060672
1	175059172	175062172
1	179439320	179442320
1	179440820	179443820
1	179449820	179452820
1	179451320	179454320
1	179452820	179455820
1	179454320	179457320
1	179455820	179458820
1	182254632	182257632
1	182260632	182263632
1	182262132	182265132
1	182508132	182511132
1	182509632	182512632
1	183072132	183075132
1	183085632	183088632
1	183094632	183097632
1	183096132	183099132
1	183154632	183157632
1	183156132	183159132
1	183160632	183163632
1	183264132	183267132
1	183295632	183298632
1	183297132	183300132
1	183577632	183580632
1	183579132	183582132
1	183580632	183583632
1	183666132	183669132
1	183667632	183670632
1	183669132	183672132
1	185524776	185527776
1	185526276	185529276
1	185527776	185530776
1	185565276	185568276
1	185566776	185569776
1	185568276	185571276
1	187753616	187756616
1	188229116	188232116
1	188233616	188236616
1	188239616	188242616
1	188241116	188244116
1	188242616	188245616
1	188245616	188248616
1	188247116	188250116
1	188251616	188254616
1	188319116	188322116
1	188320616	188323616
1	188322116	188325116
1	188323616	188326616
1	188325116	188328116
1	188326616	188329616
1	188328116	188331116
1	188434616	188437616
1	188766116	188769116
1	189613616	189616616
1	189618116	189621116
1	189619616	189622616
1	189621116	189624116
1	189642116	189645116
1	189643616	189646616
1	189645116	189648116
1	189990112	189993112
1	189991612	189994612
1	189993112	189996112
1	189999112	190002112
1	190002112	190005112
1	190003612	190006612
1	192579112	192582112
1	192580612	192583612
1	192582112	192585112
1	192583612	192586612
1	192727612	192730612
1	193465729	193468729
1	194386729	194389729
1	194388229	194391229
1	195040729	195043729
1	195042229	195045229
1	195043729	195046729
1	195045229	195048229
1	195049729	195052729
1	195057229	195060229
1	195058729	195061729
1	195082729	195085729
1	195085729	195088729
1	195087229	195090229
1	195088729	195091729
1	195090229	195093229
1	195093229	195096229
1	195799729	195802729
1	195801229	195804229
1	195802729	195805729
1	195804229	195807229
1	195805729	195808729
1	195819229	195822229
1	195820729	195823729
1	195822229	195825229
1	195823729	195826729
1	195825229	195828229
1	195834107	195837107
1	195835607	195838607
1	195913607	195916607
1	195915107	195918107
1	199360626	199363626
1	200080626	200083626
1	200691126	200694126
1	200692626	200695626
1	201216126	201219126
1	201943622	201946622
1	201945122	201948122
1	201952622	201955622
1	202188122	202191122
1	204283622	204286622
1	205506145	205509145
1	205507645	205510645
1	205509145	205512145
1	207292645	207295645
1	207294145	207297145
1	208127306	208130306
1	208128806	208131806
1	210696806	210699806
1	213048653	213051653
1	213092153	213095153
1	214638097	214641097
1	214969597	214972597
1	215187097	215190097
1	215188597	215191597
1	215860597	215863597
1	216700597	216703597
1	217914167	217917167
1	219627167	219630167
1	219786167	219789167
1	219787667	219790667
1	219957340	219960340
1	219958840	219961840
1	219960340	219963340
1	220129840	220132840
1	220134340	220137340
1	220141840	220144840
1	220495840	220498840
1	221472340	221475340
1	221820340	221823340
1	223639745	223642745
1	224259245	224262245
1	226635104	226638104
1	227182604	227185604
1	228964673	228967673
1	229836173	229839173
1	230235173	230238173
1	230502173	230505173
1	230503673	230506673
1	230899673	230902673
1	231204173	231207173
1	231511673	231514673
1	231513173	231516173
1	231532673	231535673
1	232137088	232140088
1	233520088	233523088
1	233521588	233524588
1	233523088	233526088
1	233524588	233527588
1	234124588	234127588
1	234126088	234129088
1	234265588	234268588
1	234631588	234634588
1	236382132	236385132
1	236383632	236386632
1	236385132	236388132
1	236475132	236478132
1	236476632	236479632
1	236478132	236481132
1	236512632	236515632
1	236514132	236517132
1	236518632	236521632
1	236520132	236523132
1	236526132	236529132
1	236527632	236530632
1	236589132	236592132
1	236590632	236593632
1	236667132	236670132
1	236700132	236703132
1	236701632	236704632
1	236706132	236709132
1	236709132	236712132
1	236713632	236716632
1	236716632	236719632
1	236745132	236748132
1	236746632	236749632
1	237613632	237616632
1	237615132	237618132
1	237634632	237637632
1	237684132	237687132
1	237736632	237739632
1	237738132	237741132
1	237742632	237745632
1	238414627	238417627
1	238473127	238476127
1	238474627	238477627
1	238717627	238720627
1	238852627	238855627
1	238854127	238857127
1	240177127	240180127
1	240178627	240181627
1	240180127	240183127
1	240216127	240219127
1	240217627	240220627
1	240219127	240222127
1	240220627	240223627
1	240222127	240225127
1	240225127	240228127
1	241890156	241893156
1	242017656	242020656
1	242380656	242383656
1	242839656	242842656
1	244516860	244519860
1	244518360	244521360
1	245446860	245449860
1	245572860	245575860
1	246154860	246157860
1	246432360	246435360
1	246666360	246669360
1	246708360	246711360
1	246714360	246717360
1	247813756	247816756
1	247815256	247818256
1	248469256	248472256
1	248470756	248473756
1	248472256	248475256
1	248473756	248476756
1	248475256	248478256
1	248476756	248479756
1	248512756	248515756
1	248514256	248517256
2	611556	614556
2	613056	616056
2	616056	619056
2	617556	620556
2	622056	625056
2	658056	661056
2	850056	853056
2	857556	860556
2	859056	862056
2	860556	863556
2	961056	964056
2	965556	968556
2	1115556	1118556
2	1117056	1120056
2	1118556	1121556
2	1138056	1141056
2	1139556	1142556
2	1363056	1366056
2	1364556	1367556
2	1618056	1621056
2	2606556	2609556
2	2608056	2611056
2	4859526	4862526
2	4904526	4907526
2	4957026	4960026
2	7630100	7633100
2	10669077	10672077
2	10715577	10718577
2	10753077	10756077
2	10936077	10939077
2	11606577	11609577
2	12949027	12952027
2	12950527	12953527
2	15040065	15043065
2	15164565	15167565
2	15175065	15178065
2	15538065	15541065
2	18260629	18263629
2	18263629	18266629
2	18265129	18268129
2	18277129	18280129
2	18538129	18541129
2	18589129	18592129
2	18590629	18593629
2	18592129	18595129
2	18593629	18596629
2	18595129	18598129
2	18608629	18611629
2	18610129	18613129
2	18679129	18682129
2	19792129	19795129
2	19916629	19919629
2	19918129	19921129
2	25127818	25130818
2	25129318	25132318
2	29173950	29176950
2	31271630	31274630
2	33403103	33406103
2	33404603	33407603
2	33964103	33967103
2	33965603	33968603
2	33967103	33970103
2	33992603	33995603
2	34139603	34142603
2	34184603	34187603
2	34586603	34589603
2	35869103	35872103
2	35870603	35873603
2	35873603	35876603
2	35875103	35878103
2	35876603	35879603
2	35878103	35881103
2	35879603	35882603
2	35881103	35884103
2	35882603	35885603
2	35884103	35887103
2	35885603	35888603
2	35887103	35890103
2	35932103	35935103
2	35933603	35936603
2	35935103	35938103
2	35936603	35939603
2	37381029	37384029
2	38054529	38057529
2	38056029	38059029
2	38057529	38060529
2	38059029	38062029
2	38060529	38063529
2	38749029	38752029
2	40610804	40613804
2	41842304	41845304
2	41936804	41939804
2	41963804	41966804
2	42337024	42340024
2	43421524	43424524
2	45209539	45212539
2	45211039	45214039
2	45968539	45971539
2	46052539	46055539
2	46054039	46057039
2	46327039	46330039
2	46489039	46492039
2	47065039	47068039
2	50215028	50218028
2	50216528	50219528
2	50224028	50227028
2	50225528	50228528
2	52721523	52724523
2	52931523	52934523
2	57440596	57443596
2	65782132	65785132
2	65783632	65786632
2	66076008	66079008
2	66209508	66212508
2	66211008	66214008
2	67346508	67349508
2	67912008	67915008
2	68027508	68030508
2	68029008	68032008
2	68173008	68176008
2	68569008	68572008
2	68597508	68600508
2	68600508	68603508
2	68620008	68623008
2	68900508	68903508
2	70943524	70946524
2	70964524	70967524
2	71048524	71051524
2	71050024	71053024
2	71051524	71054524
2	71053024	71056024
2	75560953	75563953
2	76349953	76352953
2	76358953	76361953
2	76360453	76363453
2	76363453	76366453
2	76364953	76367953
2	76366453	76369453
2	76370953	76373953
2	76741453	76744453
2	76742953	76745953
2	77219953	77222953
2	77221453	77224453
2	77470453	77473453
2	79160561	79163561
2	79225061	79228061
2	79226561	79229561
2	79228061	79231061
2	79229561	79232561
2	79283561	79286561
2	79889561	79892561
2	82027037	82030037
2	82028537	82031537
2	82030037	82033037
2	82031537	82034537
2	82033037	82036037
2	82034537	82037537
2	82186037	82189037
2	85925636	85928636
2	85927136	85930136
2	86128136	86131136
2	86420636	86423636
2	98978537	98981537
2	98980037	98983037
2	101245011	101248011
2	102052075	102055075
2	102077575	102080575
2	102178075	102181075
2	102821575	102824575
2	102838075	102841075
2	102967075	102970075
2	102968575	102971575
2	104149075	104152075
2	105401508	105404508
2	106142508	106145508
2	106144008	106147008
2	106382508	106385508
2	106384008	106387008
2	106615008	106618008
2	107675508	107678508
2	107677008	107680008
2	108071594	108074594
2	108791594	108794594
2	109930094	109933094
2	109931594	109934594
2	112741921	112744921
2	113833921	113836921
2	114155548	114158548
2	116902048	116905048
2	116903548	116906548
2	117230545	117233545
2	117587545	117590545
2	117592045	117595045
2	117599545	117602545
2	117700045	117703045
2	121799574	121802574
2	124274512	124277512
2	124928512	124931512
2	124930012	124933012
2	125464012	125467012
2	125465512	125468512
2	125467012	125470012
2	126388009	126391009
2	129151029	129154029
2	129152529	129155529
2	129158529	129161529
2	130403529	130406529
2	130405029	130408029
2	130406529	130409529
2	130408029	130411029
2	133158093	133161093
2	133213593	133216593
2	133642593	133645593
2	133644093	133647093
2	137648518	137651518
2	137963518	137966518
2	137966518	137969518
2	137968018	137971018
2	137978518	137981518
2	137980018	137983018
2	140164271	140167271
2	140165771	140168771
2	141857519	141860519
2	142007519	142010519
2	142091519	142094519
2	142097519	142100519
2	142229519	142232519
2	142231019	142234019
2	142456019	142459019
2	142457519	142460519
2	142531019	142534019
2	143554019	143557019
2	149198536	149201536
2	149914036	149917036
2	150604065	150607065
2	150605565	150608565
2	150611565	150614565
2	150619065	150622065
2	150620565	150623565
2	150622065	150625065
2	150623565	150626565
2	150625065	150628065
2	151834065	151837065
2	154775642	154778642
2	155359142	155362142
2	155615642	155618642
2	160870139	160873139
2	163687072	163690072
2	163831072	163834072
2	165041547	165044547
2	166904547	166907547
2	166909047	166912047
2	166910547	166913547
2	166999047	167002047
2	167165547	167168547
2	169827637	169830637
2	169829137	169832137
2	170525137	170528137
2	170630137	170633137
2	170631637	170634637
2	171148294	171151294
2	171170794	171173794
2	172375294	172378294
2	172376794	172379794
2	172378294	172381294
2	173161294	173164294
2	178676572	178679572
2	179236072	179239072
2	182260033	182263033
2	183350949	183353949
2	183352449	183355449
2	183377949	183380949
2	191224017	191227017
2	191225517	191228517
2	191227017	191230017
2	192163067	192166067
2	192164567	192167567
2	192166067	192169067
2	193729067	193732067
2	193730567	193733567
2	193733567	193736567
2	194366567	194369567
2	194372567	194375567
2	197018553	197021553
2	199168010	199171010
2	199541510	199544510
2	206038086	206041086
2	208973504	208976504
2	211237136	211240136
2	211238636	211241636
2	211852136	211855136
2	211853636	211856636
2	211855136	211858136
2	211856636	211859636
2	211858136	211861136
2	211859636	211862636
2	214717077	214720077
2	214718577	214721577
2	214720077	214723077
2	214721577	214724577
2	214724577	214727577
2	214730577	214733577
2	214732077	214735077
2	214733577	214736577
2	214735077	214738077
2	214736577	214739577
2	214754577	214757577
2	214759077	214762077
2	216443597	216446597
2	217150097	217153097
2	218710097	218713097
2	218711597	218714597
2	219658036	219661036
2	220579036	220582036
2	220835536	220838536
2	220961536	220964536
2	221062036	221065036
2	226022531	226025531
2	226024031	226027031
2	226025531	226028531
2	226048031	226051031
2	226049531	226052531
2	226052531	226055531
2	227891531	227894531
2	227921531	227924531
2	228058128	228061128
2	228091128	228094128
2	228092628	228095628
2	228094128	228097128
2	228466128	228469128
2	228467628	228470628
2	228469128	228472128
2	228578628	228581628
2	228607128	228610128
2	228989628	228992628
2	228992628	228995628
2	228994128	228997128
2	229909128	229912128
2	229913628	229916628
2	230092128	230095128
2	230918628	230921628
2	230960628	230963628
2	230995128	230998128
2	230996628	230999628
2	231029596	231032596
2	231242596	231245596
2	231257596	231260596
2	231421096	231424096
2	231427096	231430096
2	231428596	231431596
2	231430096	231433096
2	231437596	231440596
2	231877096	231880096
2	231878596	231881596
2	232388596	232391596
2	233426596	233429596
2	233428096	233431096
2	234059233	234062233
2	234060733	234063733
2	234066733	234069733
2	234765733	234768733
2	234767233	234770233
2	234768733	234771733
2	235214233	235217233
2	235506733	235509733
2	235509733	235512733
2	236069233	236072233
2	237806778	237809778
2	237848778	237851778
2	238210278	238213278
2	238211778	238214778
2	238535778	238538778
2	239489778	239492778
2	239563278	239566278
2	239564778	239567778
2	241018012	241021012
2	241019512	241022512
2	241115512	241118512
2	241118512	241121512
2	241340512	241343512
2	241820512	241823512
2	241829512	241832512
2	241834012	241837012
3	296178	299178
3	891678	894678
3	1514178	1517178
3	1848678	1851678
3	2435178	2438178
3	2955678	2958678
3	2957178	2960178
3	2960178	2963178
3	3968065	3971065
3	3971065	3974065
3	3981565	3984565
3	3983065	3986065
3	3987565	3990565
3	4377565	4380565
3	4730065	4733065
3	5714065	5717065
3	5954065	5957065
3	5955565	5958565
3	7128513	7131513
3	7130013	7133013
3	7364013	7367013
3	7365513	7368513
3	7370013	7373013
3	7620513	7623513
3	7910013	7913013
3	7911513	7914513
3	7922013	7925013
3	7925013	7928013
3	7938513	7941513
3	7940013	7943013
3	7974513	7977513
3	7982013	7985013
3	7983513	7986513
3	7985013	7988013
3	8177013	8180013
3	8619513	8622513
3	11034711	11037711
3	12486508	12489508
3	13109008	13112008
3	13110508	13113508
3	13130008	13133008
3	13193008	13196008
3	14828008	14831008
3	16007010	16010010
3	16008510	16011510
3	16182510	16185510
3	16184010	16187010
3	16185510	16188510
3	16367010	16370010
3	18813570	18816570
3	20505570	20508570
3	20511570	20514570
3	21485214	21488214
3	21486714	21489714
3	21491214	21494214
3	21492714	21495714
3	21957714	21960714
3	21959214	21962214
3	21960714	21963714
3	21963714	21966714
3	21998214	22001214
3	22049214	22052214
3	22560714	22563714
3	22950714	22953714
3	23973714	23976714
3	25172043	25175043
3	26502543	26505543
3	26504043	26507043
3	26552043	26555043
3	27095043	27098043
3	29789041	29792041
3	30135536	30138536
3	30249536	30252536
3	30801536	30804536
3	32156036	32159036
3	32454536	32457536
3	32663036	32666036
3	32664536	32667536
3	34712029	34715029
3	36150553	36153553
3	36152053	36155053
3	36153553	36156553
3	36155053	36158053
3	36170053	36173053
3	36209053	36212053
3	36212053	36215053
3	36213553	36216553
3	39531511	39534511
3	39539011	39542011
3	39951511	39954511
3	39953011	39956011
3	39954511	39957511
3	39971011	39974011
3	40095511	40098511
3	40103011	40106011
3	41049511	41052511
3	41475511	41478511
3	41583511	41586511
3	41585011	41588011
3	41586511	41589511
3	41588011	41591011
3	41594011	41597011
3	41595511	41598511
3	41597011	41600011
3	41598511	41601511
3	42366587	42369587
3	42368087	42371087
3	42369587	42372587
3	42371087	42374087
3	42372587	42375587
3	45221019	45224019
3	54605050	54608050
3	55737550	55740550
3	55739050	55742050
3	58371529	58374529
3	59475529	59478529
3	60066529	60069529
3	60102522	60105522
3	60105522	60108522
3	60110022	60113022
3	61049022	61052022
3	61050522	61053522
3	61052022	61055022
3	62723022	62726022
3	63272062	63275062
3	63273562	63276562
3	63296062	63299062
3	67655062	67658062
3	67656562	67659562
3	67658062	67661062
3	69552869	69555869
3	69879869	69882869
3	70346369	70349369
3	70347869	70350869
3	73343063	73346063
3	73365563	73368563
3	73367063	73370063
3	73368563	73371563
3	74064563	74067563
3	74066063	74069063
3	74772563	74775563
3	74774063	74777063
3	74783063	74786063
3	75599072	75602072
3	75600572	75603572
3	75602072	75605072
3	75603572	75606572
3	75605072	75608072
3	75606572	75609572
3	76115072	76118072
3	76116572	76119572
3	76118072	76121072
3	76986572	76989572
3	77241572	77244572
3	77601572	77604572
3	77603072	77606072
3	79958044	79961044
3	82540569	82543569
3	84507918	84510918
3	84509418	84512418
3	84510918	84513918
3	85574418	85577418
3	85575918	85578918
3	85581918	85584918
3	85583418	85586418
3	85584918	85587918
3	85586418	85589418
3	85587918	85590918
3	85589418	85592418
3	85590918	85593918
3	85592418	85595418
3	85593918	85596918
3	85595418	85598418
3	85596918	85599918
3	85598418	85601418
3	85599918	85602918
3	85607418	85610418
3	85608918	85611918
3	85610418	85613418
3	85611918	85614918
3	86525418	86528418
3	86526918	86529918
3	86528418	86531418
3	86531418	86534418
3	86750418	86753418
3	86751918	86754918
3	87344059	87347059
3	87345559	87348559
3	87347059	87350059
3	88377559	88380559
3	94204955	94207955
3	94206455	94209455
3	95149955	95152955
3	95151455	95154455
3	95154455	95157455
3	95158955	95161955
3	95163455	95166455
3	95164955	95167955
3	95167955	95170955
3	95169455	95172455
3	95170955	95173955
3	95173955	95176955
3	95178455	95181455
3	95182955	95185955
3	95667455	95670455
3	96036455	96039455
3	96037955	96040955
3	97784065	97787065
3	97788565	97791565
3	97790065	97793065
3	97793065	97796065
3	97799065	97802065
3	97800565	97803565
3	97833565	97836565
3	97838065	97841065
3	97839565	97842565
3	97890565	97893565
3	97892065	97895065
3	97898065	97901065
3	97904065	97907065
3	97905565	97908565
3	97907065	97910065
3	97919065	97922065
3	97920565	97923565
3	97934065	97937065
3	97935565	97938565
3	97937065	97940065
3	97938565	97941565
3	97940065	97943065
3	97983565	97986565
3	98726065	98729065
3	98727565	98730565
3	98729065	98732065
3	98733565	98736565
3	98735065	98738065
3	98736565	98739565
3	98738065	98741065
3	98741065	98744065
3	98742565	98745565
3	98744065	98747065
3	98745565	98748565
3	98747065	98750065
3	98751565	98754565
3	98753065	98756065
3	98759065	98762065
3	98760565	98763565
3	100809504	100812504
3	100811004	100814004
3	101982504	101985504
3	102807665	102810665
3	102809165	102812165
3	102813665	102816665
3	102815165	102818165
3	102816665	102819665
3	102818165	102821165
3	102819665	102822665
3	103352165	103355165
3	103451165	103454165
3	103818665	103821665
3	103937165	103940165
3	103940165	103943165
3	104237165	104240165
3	104238665	104241665
3	104412665	104415665
3	104415665	104418665
3	104417165	104420165
3	104418665	104421665
3	104804165	104807165
3	105694583	105697583
3	105696083	105699083
3	106033583	106036583
3	107700083	107703083
3	107701583	107704583
3	108566109	108569109
3	108876609	108879609
3	109218609	109221609
3	109646109	109649109
3	109647609	109650609
3	109649109	109652109
3	109650609	109653609
3	109652109	109655109
3	109653609	109656609
3	109655109	109658109
3	109719609	109722609
3	109722609	109725609
3	110996109	110999109
3	111035109	111038109
3	111038109	111041109
3	111039609	111042609
3	111738692	111741692
3	111740192	111743192
3	111741692	111744692
3	111743192	111746192
3	111923192	111926192
3	111926192	111929192
3	111927692	111930692
3	111948692	111951692
3	111956192	111959192
3	111957692	111960692
3	111971192	111974192
3	111974192	111977192
3	111987692	111990692
3	111990692	111993692
3	112025192	112028192
3	112844192	112847192
3	112845692	112848692
3	115109090	115112090
3	115110590	115113590
3	115430090	115433090
3	116322590	116325590
3	116324090	116327090
3	121503123	121506123
3	121639623	121642623
3	121641123	121644123
3	121642623	121645623
3	123097623	123100623
3	123101070	123104070
3	123102570	123105570
3	123104070	123107070
3	123105570	123108570
3	124298070	124301070
3	124299570	124302570
3	124304070	124307070
3	124305570	124308570
3	124307070	124310070
3	124317570	124320570
3	124322070	124325070
3	124338570	124341570
3	124340070	124343070
3	124691070	124694070
3	124692570	124695570
3	125846070	125849070
3	125847570	125850570
3	125849070	125852070
3	125856570	125859570
3	125858070	125861070
3	125943570	125946570
3	125945070	125948070
3	125946570	125949570
3	125948070	125951070
3	125949570	125952570
3	125951070	125954070
3	125952570	125955570
3	126020070	126023070
3	129063520	129066520
3	131384189	131387189
3	131385689	131388689
3	131594189	131597189
3	131595689	131598689
3	131597189	131600189
3	131598689	131601689
3	131600189	131603189
3	131601689	131604689
3	131604689	131607689
3	131645189	131648189
3	131646689	131649689
3	131673689	131676689
3	131675189	131678189
3	131676689	131679689
3	131813189	131816189
3	131937689	131940689
3	132071189	132074189
3	132072689	132075689
3	132074189	132077189
3	132505160	132508160
3	132509660	132512660
3	132542660	132545660
3	132556160	132559160
3	132557660	132560660
3	132559160	132562160
3	132652160	132655160
3	133409660	133412660
3	134150660	134153660
3	134647160	134650160
3	134678660	134681660
3	136856243	136859243
3	137075243	137078243
3	137147243	137150243
3	139698586	139701586
3	139700086	139703086
3	140907586	140910586
3	140909086	140912086
3	143420002	143423002
3	143664502	143667502
3	143675002	143678002
3	143676502	143679502
3	143678002	143681002
3	143679502	143682502
3	143681002	143684002
3	143682502	143685502
3	143684002	143687002
3	143685502	143688502
3	143687002	143690002
3	145182537	145185537
3	145185537	145188537
3	145233537	145236537
3	145235037	145238037
3	145236537	145239537
3	145238037	145241037
3	145239537	145242537
3	145739037	145742037
3	145740537	145743537
3	145742037	145745037
3	145743537	145746537
3	146256537	146259537
3	146303037	146306037
3	146361537	146364537
3	147827172	147830172
3	148614672	148617672
3	148619172	148622172
3	148620672	148623672
3	148622172	148625172
3	149397672	149400672
3	149880672	149883672
3	152610534	152613534
3	153494123	153497123
3	153495623	153498623
3	153680123	153683123
3	153683123	153686123
3	153723623	153726623
3	153725123	153728123
3	153726623	153729623
3	153728123	153731123
3	153729623	153732623
3	153731123	153734123
3	155346623	155349623
3	155348123	155351123
3	155352623	155355623
3	161781699	161784699
3	161808699	161811699
3	161810199	161813199
3	161811699	161814699
3	161813199	161816199
3	161814699	161817699
3	162236492	162239492
3	162237992	162240992
3	162713492	162716492
3	162722492	162725492
3	162723992	162726992
3	162725492	162728492
3	162726992	162729992
3	162729992	162732992
3	162731492	162734492
3	162732992	162735992
3	162755492	162758492
3	163731992	163734992
3	163743992	163746992
3	164090492	164093492
3	164139992	164142992
3	164180492	164183492
3	164181992	164184992
3	164184992	164187992
3	164186492	164189492
3	165456576	165459576
3	165842076	165845076
3	165846576	165849576
3	165849576	165852576
3	165851076	165854076
3	165968076	165971076
3	166037076	166040076
3	169221931	169224931
3	171014431	171017431
3	171798538	171801538
3	171800038	171803038
3	172221538	172224538
3	172223038	172226038
3	173868538	173871538
3	174357616	174360616
3	175004116	175007116
3	176597116	176600116
3	176607616	176610616
3	177296042	177299042
3	177297542	177300542
3	177299042	177302042
3	177306542	177309542
3	178542542	178545542
3	178544042	178547042
3	178565042	178568042
3	178568042	178571042
3	178569542	178572542
3	178982042	178985042
3	179670542	179673542
3	183179306	183182306
3	183180806	183183806
3	184125806	184128806
3	184127306	184130306
3	184764806	184767806
3	184766306	184769306
3	184767806	184770806
3	184778306	184781306
3	186435663	186438663
3	186437163	186440163
3	186438663	186441663
3	187565163	187568163
3	187751163	187754163
3	189248005	189251005
3	189533005	189536005
3	189854005	189857005
3	189875005	189878005
3	189879505	189882505
3	189882505	189885505
3	189884005	189887005
3	190514005	190517005
3	190775005	190778005
3	190892005	190895005
3	190976005	190979005
3	190977505	190980505
3	190998505	191001505
3	191103505	191106505
3	191177005	191180005
3	191180005	191183005
3	191181505	191184505
3	191186005	191189005
3	192371112	192374112
3	192450612	192453612
3	192452112	192455112
3	192587112	192590112
3	192591612	192594612
3	194265612	194268612
3	194669112	194672112
4	780928	783928
4	782428	785428
4	822928	825928
4	1277428	1280428
4	2375428	2378428
4	4242134	4245134
4	4243634	4246634
4	4245134	4248134
4	4284134	4287134
4	4671134	4674134
4	4672634	4675634
4	4674134	4677134
4	4683134	4686134
4	4687634	4690634
4	5967134	5970134
4	7215081	7218081
4	7317081	7320081
4	7318581	7321581
4	7320081	7323081
4	7429581	7432581
4	8581581	8584581
4	9192518	9195518
4	9951518	9954518
4	9953018	9956018
4	9954518	9957518
4	9956018	9959018
4	9957518	9960518
4	9959018	9962018
4	9963518	9966518
4	9965018	9968018
4	9966518	9969518
4	10725518	10728518
4	12085548	12088548
4	12090048	12093048
4	16416090	16419090
4	16417590	16420590
4	16419090	16422090
4	16420590	16423590
4	17307090	17310090
4	17695590	17698590
4	18748720	18751720
4	18750220	18753220
4	23589144	23592144
4	23593644	23596644
4	23601144	23604144
4	23602644	23605644
4	23607144	23610144
4	24670621	24673621
4	25000621	25003621
4	25464121	25467121
4	27781606	27784606
4	28038106	28041106
4	28227106	28230106
4	28243606	28246606
4	28981606	28984606
4	31335494	31338494
4	31336994	31339994
4	31588994	31591994
4	31590494	31593494
4	32196494	32199494
4	32199494	32202494
4	32200994	32203994
4	32251994	32254994
4	32253494	32256494
4	32254994	32257994
4	35493119	35496119
4	35496119	35499119
4	35506619	35509619
4	35508119	35511119
4	35509619	35512619
4	35512619	35515619
4	35514119	35517119
4	35515619	35518619
4	35517119	35520119
4	35518619	35521619
4	36441039	36444039
4	36444039	36447039
4	36447039	36450039
4	36618039	36621039
4	36624039	36627039
4	36625539	36628539
4	36627039	36630039
4	36628539	36631539
4	36631539	36634539
4	36637539	36640539
4	36997539	37000539
4	37078539	37081539
4	37080039	37083039
4	37081539	37084539
4	37083039	37086039
4	37159539	37162539
4	37525539	37528539
4	37560039	37563039
4	37561539	37564539
4	37563039	37566039
4	37786539	37789539
4	37800039	37803039
4	37801539	37804539
4	37803039	37806039
4	38187039	38190039
4	38194539	38197539
4	38196039	38199039
4	38878539	38881539
4	38910039	38913039
4	38923539	38926539
4	38991039	38994039
4	38992539	38995539
4	39108044	39111044
4	39109544	39112544
4	39112544	39115544
4	39115544	39118544
4	39117044	39120044
4	39118544	39121544
4	39120044	39123044
4	41322044	41325044
4	42609463	42612463
4	42610963	42613963
4	42612463	42615463
4	42618463	42621463
4	42621463	42624463
4	42738463	42741463
4	42739963	42742963
4	42741463	42744463
4	42850963	42853963
4	44661463	44664463
4	44662963	44665963
4	48171046	48174046
4	48172546	48175546
4	48174046	48177046
4	48175546	48178546
4	48177046	48180046
4	48178546	48181546
4	53130441	53133441
4	54472649	54475649
4	54474149	54477149
4	55687649	55690649
4	55689149	55692149
4	56023649	56026649
4	56025149	56028149
4	56316149	56319149
4	56320649	56323649
4	56379149	56382149
4	56380649	56383649
4	57127631	57130631
4	57129131	57132131
4	57556631	57559631
4	57916631	57919631
4	57918131	57921131
4	58566131	58569131
4	58567631	58570631
4	58569131	58572131
4	58570631	58573631
4	58720631	58723631
4	58960631	58963631
4	58977131	58980131
4	59607131	59610131
4	59608631	59611631
4	59610131	59613131
4	59628131	59631131
4	59629631	59632631
4	60055656	60058656
4	60841656	60844656
4	61368156	61371156
4	63235559	63238559
4	63429059	63432059
4	64849559	64852559
4	64851059	64854059
4	65536559	65539559
4	65538059	65541059
4	65541059	65544059
4	65817059	65820059
4	66718575	66721575
4	66750075	66753075
4	66751575	66754575
4	66753075	66756075
4	66756075	66759075
4	66994575	66997575
4	68451075	68454075
4	69347015	69350015
4	69348515	69351515
4	69350015	69353015
4	70386515	70389515
4	70388015	70391015
4	70389515	70392515
4	70394015	70397015
4	70413515	70416515
4	70419515	70422515
4	70487015	70490015
4	71114015	71117015
4	71127515	71130515
4	71135015	71138015
4	71207015	71210015
4	71208515	71211515
4	71210015	71213015
4	71211515	71214515
4	71213015	71216015
4	71214515	71217515
4	71250515	71253515
4	71366015	71369015
4	71367515	71370515
4	71379515	71382515
4	71384015	71387015
4	72471402	72474402
4	73627902	73630902
4	73629402	73632402
4	73630902	73633902
4	73638402	73641402
4	73758402	73761402
4	74446902	74449902
4	74448402	74451402
4	74449902	74452902
4	74451402	74454402
4	74452902	74455902
4	75421613	75424613
4	76300613	76303613
4	76302113	76305113
4	76303613	76306613
4	76623113	76626113
4	76846613	76849613
4	76854113	76857113
4	76855613	76858613
4	76857113	76860113
4	76950113	76953113
4	76951613	76954613
4	76953113	76956113
4	76954613	76957613
4	76960613	76963613
4	76962113	76965113
4	76971113	76974113
4	76972613	76975613
4	77062613	77065613
4	77148113	77151113
4	77193113	77196113
4	77454113	77457113
4	77455613	77458613
4	77467613	77470613
4	77913113	77916113
4	77914613	77917613
4	78346699	78349699
4	78372199	78375199
4	79282699	79285699
4	79384699	79387699
4	79386199	79389199
4	79419199	79422199
4	79420699	79423699
4	79428199	79431199
4	79429699	79432699
4	79443199	79446199
4	79449199	79452199
4	79453699	79456699
4	80806699	80809699
4	80808199	80811199
4	82732615	82735615
4	82857115	82860115
4	82858615	82861615
4	82860115	82863115
4	82864615	82867615
4	82866115	82869115
4	83553115	83556115
4	84142583	84145583
4	84237083	84240083
4	84238583	84241583
4	84805583	84808583
4	84807083	84810083
4	84825083	84828083
4	84826583	84829583
4	84943583	84946583
4	85024583	85027583
4	85026083	85029083
4	85029083	85032083
4	86274083	86277083
4	86572583	86575583
4	87253825	87256825
4	88144825	88147825
4	88453825	88456825
4	88783825	88786825
4	88792825	88795825
4	89899825	89902825
4	90165093	90168093
4	90166593	90169593
4	90748593	90751593
4	90753093	90756093
4	91714593	91717593
4	92280093	92283093
4	93504078	93507078
4	94803078	94806078
4	95761578	95764578
4	95764578	95767578
4	95766078	95769078
4	95769078	95772078
4	95770578	95773578
4	95772078	95775078
4	95773578	95776578
4	95776578	95779578
4	96726179	96729179
4	97423679	97426679
4	97425179	97428179
4	97426679	97429679
4	97428179	97431179
4	97429679	97432679
4	97431179	97434179
4	97432679	97435679
4	97434179	97437179
4	98259179	98262179
4	98950679	98953679
4	98982179	98985179
4	99013643	99016643
4	99015143	99018143
4	99018143	99021143
4	99019643	99022643
4	99024143	99027143
4	99025643	99028643
4	99028643	99031643
4	99031643	99034643
4	99037643	99040643
4	99039143	99042143
4	99043643	99046643
4	99048143	99051143
4	99054143	99057143
4	99055643	99058643
4	99064643	99067643
4	99465143	99468143
4	99675143	99678143
4	99787643	99790643
4	100057643	100060643
4	100059143	100062143
4	100060643	100063643
4	100261643	100264643
4	100263143	100266143
4	100264643	100267643
4	101106143	101109143
4	101124143	101127143
4	101445143	101448143
4	101446643	101449643
4	101479643	101482643
4	101497643	101500643
4	101503643	101506643
4	101505143	101508143
4	101506643	101509643
4	102474143	102477143
4	102723143	102726143
4	103282643	103285643
4	103551143	103554143
4	103552643	103555643
4	103554143	103557143
4	106311097	106314097
4	109480656	109483656
4	109482156	109485156
4	109942656	109945656
4	109944156	109947156
4	109969656	109972656
4	110152656	110155656
4	112762666	112765666
4	112764166	112767166
4	114012073	114015073
4	114018073	114021073
4	114019573	114022573
4	114021073	114024073
4	115144573	115147573
4	115375573	115378573
4	115377073	115380073
4	115378573	115381573
4	115411573	115414573
4	115413073	115416073
4	115414573	115417573
4	115431073	115434073
4	116085073	116088073
4	116170573	116173573
4	116172073	116175073
4	116176573	116179573
4	116377573	116380573
4	116389573	116392573
4	116394073	116397073
4	116395573	116398573
4	116406073	116409073
4	116509573	116512573
4	116511073	116514073
4	116916073	116919073
4	117886604	117889604
4	117889604	117892604
4	117891104	117894104
4	118159604	118162604
4	118707104	118710104
4	120022616	120025616
4	120024116	120027116
4	120048116	120051116
4	120049616	120052616
4	120069116	120072116
4	120234116	120237116
4	120235616	120238616
4	120237116	120240116
4	120238616	120241616
4	121401116	121404116
4	121516616	121519616
4	121714616	121717616
4	122281616	122284616
4	122613116	122616116
4	122662616	122665616
4	122664116	122667116
4	127063544	127066544
4	127065044	127068044
4	127818044	127821044
4	127819544	127822544
4	131050162	131053162
4	131252662	131255662
4	131254162	131257162
4	131845162	131848162
4	131846662	131849662
4	132970569	132973569
4	133032069	133035069
4	133111569	133114569
4	133551069	133554069
4	133645569	133648569
4	133849569	133852569
4	133851069	133854069
4	134533569	134536569
4	135792046	135795046
4	135885046	135888046
4	135898546	135901546
4	136123546	136126546
4	136132546	136135546
4	136134046	136137046
4	136681546	136684546
4	136683046	136686046
4	137403046	137406046
4	137949046	137952046
4	137950546	137953546
4	138162062	138165062
4	138163562	138166562
4	139117562	139120562
4	139119062	139122062
4	139506062	139509062
4	140175062	140178062
4	141916613	141919613
4	141918113	141921113
4	142663613	142666613
4	142665113	142668113
4	144049655	144052655
4	144051155	144054155
4	144654155	144657155
4	144655655	144658655
4	144657155	144660155
4	144658655	144661655
4	144673655	144676655
4	145195655	145198655
4	145197155	145200155
4	148350073	148353073
4	148516573	148519573
4	152604928	152607928
4	154513650	154516650
4	154893150	154896150
4	154894650	154897650
4	155359650	155362650
4	155410650	155413650
4	155766150	155769150
4	156099072	156102072
4	156100572	156103572
4	156108072	156111072
4	157507572	157510572
4	157509072	157512072
4	159350443	159353443
4	159362443	159365443
4	159365443	159368443
4	159366943	159369943
4	159369943	159372943
4	159371443	159374443
4	159375943	159378943
4	159377443	159380443
4	159381943	159384943
4	160380943	160383943
4	160556443	160559443
4	161472943	161475943
4	161681443	161684443
4	162012165	162015165
4	162013665	162016665
4	162015165	162018165
4	162022665	162025665
4	162198165	162201165
4	162225165	162228165
4	163263165	163266165
4	163264665	163267665
4	163716165	163719165
4	163807665	163810665
4	163809165	163812165
4	165705051	165708051
4	165706551	165709551
4	165711051	165714051
4	165726051	165729051
4	165727551	165730551
4	166338051	166341051
4	166339551	166342551
4	166344051	166347051
4	166345551	166348551
4	166347051	166350051
4	166348551	166351551
4	166350051	166353051
4	167410551	167413551
4	169438589	169441589
4	171937579	171940579
4	172876579	172879579
4	173694079	173697079
4	175024542	175027542
4	175776042	175779042
4	175810542	175813542
4	176994042	176997042
4	177228092	177231092
4	177232592	177235592
4	177262592	177265592
4	177438092	177441092
4	178881092	178884092
4	179020592	179023592
4	179022092	179025092
4	179518592	179521592
4	180067628	180070628
4	180069128	180072128
4	180409628	180412628
4	180411128	180414128
4	180502628	180505628
4	180504128	180507128
4	180900128	180903128
4	181437128	181440128
4	181438628	181441628
4	181468628	181471628
4	181470128	181473128
4	181471628	181474628
4	182278628	182281628
4	183246059	183249059
4	183807059	183810059
4	183808559	183811559
4	184291559	184294559
4	185646059	185649059
4	185748059	185751059
4	185776559	185779559
4	185778059	185781059
4	185907059	185910059
4	185908559	185911559
4	185910059	185913059
4	186798111	186801111
4	187099611	187102611
4	187369611	187372611
4	187371111	187374111
4	188208111	188211111
4	188928111	188931111
4	188929611	188932611
4	188931111	188934111
4	189241953	189244953
4	189243453	189246453
4	189247953	189250953
4	189249453	189252453
4	189295953	189298953
4	189589953	189592953
4	189591453	189594453
4	189834453	189837453
4	189849453	189852453
4	189852453	189855453
4	189853953	189856953
4	189856953	189859953
4	190294953	190297953
4	190297953	190300953
4	190299453	190302453
5	183066	186066
5	2335566	2338566
5	4022969	4025969
5	5089469	5092469
5	5090969	5093969
5	5140469	5143469
5	5300969	5303969
5	5417969	5420969
5	5735969	5738969
5	5737469	5740469
5	6209881	6212881
5	6211381	6214381
5	6217381	6220381
5	6634381	6637381
5	7561381	7564381
5	7925881	7928881
5	8000881	8003881
5	8011381	8014381
5	8014381	8017381
5	8015881	8018881
5	8017381	8020381
5	8018881	8021881
5	8020381	8023381
5	8021881	8024881
5	8023381	8026381
5	8531881	8534881
5	8569381	8572381
5	8726881	8729881
5	8738881	8741881
5	8740381	8743381
5	8741881	8744881
5	8762881	8765881
5	8827381	8830381
5	8828881	8831881
5	8830381	8833381
5	10630569	10633569
5	10632069	10635069
5	10642569	10645569
5	10948569	10951569
5	10950069	10953069
5	10951569	10954569
5	13030423	13033423
5	13421923	13424923
5	13432423	13435423
5	13832923	13835923
5	13912423	13915423
5	16501393	16504393
5	16649893	16652893
5	16654393	16657393
5	16655893	16658893
5	16922893	16925893
5	16925893	16928893
5	19370957	19373957
5	19372457	19375457
5	20542457	20545457
5	20543957	20546957
5	20545457	20548457
5	22471588	22474588
5	24125918	24128918
5	24577418	24580418
5	25571918	25574918
5	26813918	26816918
5	26818418	26821418
5	28331932	28334932
5	29209432	29212432
5	29210932	29213932
5	29254432	29257432
5	29255932	29258932
5	29464432	29467432
5	29465932	29468932
5	29690932	29693932
5	30085436	30088436
[truncated: 4,403 more rows]

## Sheet: SIGNIF_tf0.4_LWK
1	2916088	2919088
1	4459620	4462620
1	4596120	4599120
1	4597620	4600620
1	4599120	4602120
1	7960702	7963702
1	8158702	8161702
1	8193202	8196202
1	9093202	9096202
1	9265702	9268702
1	9267202	9270202
1	9271702	9274702
1	14424088	14427088
1	14455588	14458588
1	14457088	14460088
1	14478088	14481088
1	15280588	15283588
1	15282088	15285088
1	15456088	15459088
1	15457588	15460588
1	15510088	15513088
1	15511588	15514588
1	15553588	15556588
1	15555088	15558088
1	16374105	16377105
1	16378605	16381605
1	16380105	16383105
1	17400105	17403105
1	17401605	17404605
1	17421105	17424105
1	17716605	17719605
1	17718105	17721105
1	18123105	18126105
1	18471105	18474105
1	18804105	18807105
1	19173124	19176124
1	19200124	19203124
1	19936624	19939624
1	20944624	20947624
1	21898608	21901608
1	22305108	22308108
1	22306608	22309608
1	22308108	22311108
1	23076108	23079108
1	24198108	24201108
1	24199608	24202608
1	24207108	24210108
1	24900282	24903282
1	24930282	24933282
1	25012782	25015782
1	25182282	25185282
1	25183782	25186782
1	26167782	26170782
1	29802214	29805214
1	30520714	30523714
1	30738214	30741214
1	30862585	30865585
1	30990085	30993085
1	31063585	31066585
1	31075585	31078585
1	31671085	31674085
1	34039916	34042916
1	34654916	34657916
1	34656416	34659416
1	35302916	35305916
1	40152093	40155093
1	40153593	40156593
1	40155093	40158093
1	53488761	53491761
1	53490261	53493261
1	53491761	53494761
1	53500761	53503761
1	54156261	54159261
1	55047112	55050112
1	55518112	55521112
1	57067612	57070612
1	57069112	57072112
1	57445612	57448612
1	57447112	57450112
1	58525753	58528753
1	59020753	59023753
1	59464753	59467753
1	59466253	59469253
1	62688291	62691291
1	63412791	63415791
1	64660935	64663935
1	64771935	64774935
1	64773435	64776435
1	66124935	66127935
1	66126435	66129435
1	66127935	66130935
1	66132435	66135435
1	68871088	68874088
1	68872588	68875588
1	70582095	70585095
1	70975095	70978095
1	73554108	73557108
1	76747933	76750933
1	77104933	77107933
1	77106433	77109433
1	77107933	77110933
1	77109433	77112433
1	77110933	77113933
1	77208433	77211433
1	78630433	78633433
1	78633433	78636433
1	80845601	80848601
1	80847101	80850101
1	81400601	81403601
1	81402101	81405101
1	81957170	81960170
1	83107670	83110670
1	83145170	83148170
1	83160170	83163170
1	83164670	83167670
1	83166170	83169170
1	86457087	86460087
1	86458587	86461587
1	86464587	86467587
1	88476150	88479150
1	91278143	91281143
1	91284143	91287143
1	91642643	91645643
1	91653143	91656143
1	92095643	92098643
1	92389643	92392643
1	92391143	92394143
1	93520643	93523643
1	94228650	94231650
1	94230150	94233150
1	94239150	94242150
1	94240650	94243650
1	94248150	94251150
1	94264650	94267650
1	94444650	94447650
1	94461150	94464150
1	94465650	94468650
1	94467150	94470150
1	95148150	95151150
1	95149650	95152650
1	96151650	96154650
1	100147583	100150583
1	100149083	100152083
1	100150583	100153583
1	100932083	100935083
1	100933583	100936583
1	100951583	100954583
1	101032583	101035583
1	102067583	102070583
1	102069083	102072083
1	102084083	102087083
1	102085583	102088583
1	102234083	102237083
1	102235583	102238583
1	102408083	102411083
1	102814583	102817583
1	102816083	102819083
1	102828083	102831083
1	102829583	102832583
1	102834085	102837085
1	103594585	103597585
1	103612585	103615585
1	103614085	103617085
1	104713585	104716585
1	105499585	105502585
1	105501085	105504085
1	105502585	105505585
1	105790585	105793585
1	105940068	105943068
1	106115568	106118568
1	106720068	106723068
1	106724568	106727568
1	107563068	107566068
1	108079068	108082068
1	108085068	108088068
1	108242568	108245568
1	108493068	108496068
1	108500568	108503568
1	108565068	108568068
1	108653568	108656568
1	108695568	108698568
1	109366525	109369525
1	110308525	110311525
1	111580525	111583525
1	111582025	111585025
1	111795025	111798025
1	111906306	111909306
1	112650306	112653306
1	114526806	114529806
1	114528306	114531306
1	116730103	116733103
1	116731603	116734603
1	116733103	116736103
1	116734603	116737603
1	116736103	116739103
1	116737603	116740603
1	116739103	116742103
1	117472603	117475603
1	117873092	117876092
1	118354592	118357592
1	120084092	120087092
1	120085592	120088592
1	120087092	120090092
1	120331592	120334592
1	120333092	120336092
1	120334592	120337592
1	152607210	152610210
1	152691210	152694210
1	152692710	152695710
1	152694210	152697210
1	152964210	152967210
1	152970210	152973210
1	152971710	152974710
1	152973210	152976210
1	152974710	152977710
1	152982210	152985210
1	152985210	152988210
1	153001710	153004710
1	153003210	153006210
1	153004710	153007710
1	153132210	153135210
1	153133710	153136710
1	153321210	153324210
1	153469710	153472710
1	157194269	157197269
1	157195769	157198769
1	157203269	157206269
1	157204769	157207769
1	157594769	157597769
1	157596269	157599269
1	157597769	157600769
1	158163269	158166269
1	158196269	158199269
1	158344769	158347769
1	158350769	158353769
1	158463269	158466269
1	158496269	158499269
1	158497769	158500769
1	158713769	158716769
1	158731769	158734769
1	158733269	158736269
1	158839769	158842769
1	158841269	158844269
1	158943269	158946269
1	159000269	159003269
1	159987091	159990091
1	160536091	160539091
1	162030091	162033091
1	162835591	162838591
1	165592591	165595591
1	167524617	167527617
1	171166593	171169593
1	175057672	175060672
1	175059172	175062172
1	179437820	179440820
1	179449820	179452820
1	179451320	179454320
1	179452820	179455820
1	179454320	179457320
1	179686820	179689820
1	180219320	180222320
1	181159632	181162632
1	181180632	181183632
1	181182132	181185132
1	181185132	181188132
1	182508132	182511132
1	183094632	183097632
1	183114132	183117132
1	183154632	183157632
1	183156132	183159132
1	183159132	183162132
1	183160632	183163632
1	183297132	183300132
1	183558132	183561132
1	183561132	183564132
1	183580632	183583632
1	185526276	185529276
1	185527776	185530776
1	185566776	185569776
1	185568276	185571276
1	187752116	187755116
1	187753616	187756616
1	188245616	188248616
1	188299616	188302616
1	188322116	188325116
1	188323616	188326616
1	188325116	188328116
1	188326616	188329616
1	188445116	188448116
1	188835116	188838116
1	188863616	188866616
1	188865116	188868116
1	188866616	188869616
1	189618116	189621116
1	189643616	189646616
1	192580612	192583612
1	192582112	192585112
1	192583612	192586612
1	193870729	193873729
1	194385229	194388229
1	194386729	194389729
1	194388229	194391229
1	195043729	195046729
1	195057229	195060229
1	195081229	195084229
1	195085729	195088729
1	195087229	195090229
1	195088729	195091729
1	195093229	195096229
1	195775729	195778729
1	195799729	195802729
1	195801229	195804229
1	195802729	195805729
1	195804229	195807229
1	195820729	195823729
1	195822229	195825229
1	195823729	195826729
1	195825229	195828229
1	195826729	195829729
1	195835607	195838607
1	195913607	195916607
1	195915107	195918107
1	196842107	196845107
1	199593126	199596126
1	199602126	199605126
1	200692626	200695626
1	201217626	201220626
1	201472626	201475626
1	201943622	201946622
1	201945122	201948122
1	201952622	201955622
1	201954122	201957122
1	204283622	204286622
1	204285122	204288122
1	204792122	204795122
1	204904645	204907645
1	204906145	204909145
1	205018645	205021645
1	205374145	205377145
1	205407145	205410145
1	205498645	205501645
1	205507645	205510645
1	211703153	211706153
1	213036653	213039653
1	213051653	213054653
1	215860597	215863597
1	217587167	217590167
1	219786167	219789167
1	219958840	219961840
1	220128340	220131340
1	220141840	220144840
1	220495840	220498840
1	220497340	220500340
1	221472340	221475340
1	221820340	221823340
1	221832340	221835340
1	221853340	221856340
1	223639745	223642745
1	224257745	224260745
1	224259245	224262245
1	224274245	224277245
1	224275745	224278745
1	226635104	226638104
1	226636604	226639604
1	227389604	227392604
1	227479604	227482604
1	227502104	227505104
1	228964673	228967673
1	228966173	228969173
1	228967673	228970673
1	229240673	229243673
1	229342673	229345673
1	230500673	230503673
1	230502173	230505173
1	230503673	230506673
1	230505173	230508173
1	231210173	231213173
1	231729173	231732173
1	231730673	231733673
1	233022088	233025088
1	233488588	233491588
1	233520088	233523088
1	233521588	233524588
1	234130588	234133588
1	234132088	234135088
1	234133588	234136588
1	234165088	234168088
1	234406588	234409588
1	234408088	234411088
1	234409588	234412588
1	236383632	236386632
1	236476632	236479632
1	236478132	236481132
1	236518632	236521632
1	236520132	236523132
1	236526132	236529132
1	236532132	236535132
1	236587632	236590632
1	236589132	236592132
1	236700132	236703132
1	236701632	236704632
1	236704632	236707632
1	236706132	236709132
1	236707632	236710632
1	236709132	236712132
1	236713632	236716632
1	236715132	236718132
1	236745132	236748132
1	237615132	237618132
1	237684132	237687132
1	237739632	237742632
1	237741132	237744132
1	237742632	237745632
1	237751632	237754632
1	237982627	237985627
1	238414627	238417627
1	238471627	238474627
1	238474627	238477627
1	238627627	238630627
1	238629127	238632127
1	238635127	238638127
1	238732627	238735627
1	238852627	238855627
1	239922127	239925127
1	240178627	240181627
1	240217627	240220627
1	240219127	240222127
1	240220627	240223627
1	240222127	240225127
1	240597127	240600127
1	240601627	240604627
1	241530156	241533156
1	242382156	242385156
1	242404656	242407656
1	242599656	242602656
1	242839656	242842656
1	245572860	245575860
1	246027360	246030360
1	246378360	246381360
1	246379860	246382860
1	246381360	246384360
1	246387360	246390360
1	246388860	246391860
1	246397860	246400860
1	246405360	246408360
1	246408360	246411360
1	246409860	246412860
1	246415860	246418860
1	246417360	246420360
1	246432360	246435360
1	246666360	246669360
1	246711360	246714360
1	246712860	246715860
1	247614256	247617256
1	247615756	247618756
1	247621756	247624756
1	247623256	247626256
1	247624756	247627756
1	247626256	247629256
1	247815256	247818256
1	247945756	247948756
1	247953256	247956256
1	248553256	248556256
1	248865256	248868256
1	248892256	248895256
1	248895256	248898256
2	616056	619056
2	617556	620556
2	656556	659556
2	859056	862056
2	1115556	1118556
2	1117056	1120056
2	1138056	1141056
2	1141056	1144056
2	1238556	1241556
2	1360056	1363056
2	1361556	1364556
2	1363056	1366056
2	1364556	1367556
2	1367556	1370556
2	1369056	1372056
2	1618056	1621056
2	1640556	1643556
2	1771056	1774056
2	2606556	2609556
2	4859526	4862526
2	4861026	4864026
2	5972526	5975526
2	6278600	6281600
2	6332600	6335600
2	7630100	7633100
2	8728100	8731100
2	9814077	9817077
2	9887577	9890577
2	10133577	10136577
2	10367577	10370577
2	10669077	10672077
2	10670577	10673577
2	10732077	10735077
2	10753077	10756077
2	11018577	11021577
2	11834577	11837577
2	12310027	12313027
2	12950527	12953527
2	13613527	13616527
2	13817527	13820527
2	13819027	13822027
2	15085065	15088065
2	15164565	15167565
2	15595065	15598065
2	15596565	15599565
2	15836565	15839565
2	16435065	16438065
2	16661565	16664565
2	17059065	17062065
2	17468565	17471565
2	17978565	17981565
2	17987565	17990565
2	17989065	17992065
2	18262129	18265129
2	18263629	18266629
2	18265129	18268129
2	18269629	18272629
2	18271129	18274129
2	18277129	18280129
2	18589129	18592129
2	18590629	18593629
2	18592129	18595129
2	18593629	18596629
2	18595129	18598129
2	18596629	18599629
2	18598129	18601129
2	18599629	18602629
2	18604129	18607129
2	18605629	18608629
2	18658129	18661129
2	18679129	18682129
2	19792129	19795129
2	21898111	21901111
2	25129318	25132318
2	28819950	28822950
2	30116630	30119630
2	30478130	30481130
2	31211630	31214630
2	31270130	31273130
2	31397630	31400630
2	31409630	31412630
2	31502630	31505630
2	31507130	31510130
2	33400103	33403103
2	33403103	33406103
2	33404603	33407603
2	33406103	33409103
2	34139603	34142603
2	34145603	34148603
2	34147103	34150103
2	34184603	34187603
2	35869103	35872103
2	35870603	35873603
2	35872103	35875103
2	35873603	35876603
2	35875103	35878103
2	35876603	35879603
2	35878103	35881103
2	35879603	35882603
2	35881103	35884103
2	35882603	35885603
2	35884103	35887103
2	35887103	35890103
2	35935103	35938103
2	35936603	35939603
2	36118029	36121029
2	36130029	36133029
2	36182529	36185529
2	36926529	36929529
2	36928029	36931029
2	38054529	38057529
2	38056029	38059029
2	38057529	38060529
2	38059029	38062029
2	38060529	38063529
2	38062029	38065029
2	38063529	38066529
2	38065029	38068029
2	38482029	38485029
2	38686029	38689029
2	40115804	40118804
2	40868804	40871804
2	41939804	41942804
2	41963804	41966804
2	41965304	41968304
2	42235024	42238024
2	42242524	42245524
2	42263524	42266524
2	42304024	42307024
2	43343524	43346524
2	45203539	45206539
2	45205039	45208039
2	45206539	45209539
2	45208039	45211039
2	45209539	45212539
2	45211039	45214039
2	46327039	46330039
2	47477539	47480539
2	49960028	49963028
2	50248028	50251028
2	52721523	52724523
2	52753023	52756023
2	52877523	52880523
2	52897023	52900023
2	53053023	53056023
2	53560023	53563023
2	57440596	57443596
2	66209508	66212508
2	68029008	68032008
2	68173008	68176008
2	68599008	68602008
2	69215524	69218524
2	69224524	69227524
2	69226024	69229024
2	70639024	70642024
2	70943524	70946524
2	71048524	71051524
2	71050024	71053024
2	71051524	71054524
2	71053024	71056024
2	73366147	73369147
2	74968147	74971147
2	75559453	75562453
2	76742953	76745953
2	77221453	77224453
2	77480953	77483953
2	77962453	77965453
2	77963953	77966953
2	79138061	79141061
2	79139561	79142561
2	79141061	79144061
2	79225061	79228061
2	79226561	79229561
2	79228061	79231061
2	79282061	79285061
2	79283561	79286561
2	82027037	82030037
2	84053636	84056636
2	84055136	84058136
2	84056636	84059636
2	84199136	84202136
2	84440636	84443636
2	85925636	85928636
2	88393027	88396027
2	100982511	100985511
2	101071011	101074011
2	101077011	101080011
2	101081511	101084511
2	101083011	101086011
2	101084511	101087511
2	102050575	102053575
2	102052075	102055075
2	102053575	102056575
2	102055075	102058075
2	102077575	102080575
2	102178075	102181075
2	102632575	102635575
2	102634075	102637075
2	102967075	102970075
2	105401508	105404508
2	106124508	106127508
2	106126008	106129008
2	106130508	106133508
2	106145508	106148508
2	106607508	106610508
2	106615008	106618008
2	108071594	108074594
2	108313094	108316094
2	109928594	109931594
2	109930094	109933094
2	109931594	109934594
2	109933094	109936094
2	113821921	113824921
2	113833921	113836921
2	113838421	113841421
2	113839921	113842921
2	113841421	113844421
2	113842921	113845921
2	114155548	114158548
2	117229045	117232045
2	117230545	117233545
2	117722545	117725545
2	118402045	118405045
2	121462074	121465074
2	121796574	121799574
2	121798074	121801074
2	121799574	121802574
2	121894074	121897074
2	122054574	122057574
2	123842512	123845512
2	123920512	123923512
2	125299012	125302012
2	125609512	125612512
2	127607509	127610509
2	127685509	127688509
2	127724509	127727509
2	127834009	127837009
2	129338529	129341529
2	129344529	129347529
2	129346029	129349029
2	129358029	129361029
2	129359529	129362529
2	133192593	133195593
2	135416518	135419518
2	137648518	137651518
2	137962018	137965018
2	137963518	137966518
2	137966518	137969518
2	137968018	137971018
2	137980018	137983018
2	137981518	137984518
2	138448271	138451271
2	140165771	140168771
2	142091519	142094519
2	142093019	142096019
2	142096019	142099019
2	142228019	142231019
2	142229519	142232519
2	142231019	142234019
2	142232519	142235519
2	143387519	143390519
2	143570519	143573519
2	143959019	143962019
2	149198536	149201536
2	150001036	150004036
2	150002536	150005536
2	150005536	150008536
2	150605565	150608565
2	150610065	150613065
2	150611565	150614565
2	150619065	150622065
2	150620565	150623565
2	150625065	150628065
2	151871565	151874565
2	151873065	151876065
2	155255642	155258642
2	155615642	155618642
2	158957556	158960556
2	165043047	165046047
2	165631047	165634047
2	165632547	165635547
2	166021047	166024047
2	166022547	166025547
2	167449047	167452047
2	168653137	168656137
2	169500637	169503637
2	170295637	170298637
2	172049794	172052794
2	172375294	172378294
2	172376794	172379794
2	172378294	172381294
2	173044294	173047294
2	173060794	173063794
2	174151001	174154001
2	174518501	174521501
2	174520001	174523001
2	178567072	178570072
2	178676572	178679572
2	178678072	178681072
2	181790533	181793533
2	181792033	181795033
2	182992033	182995033
2	182993533	182996533
2	183352449	183355449
2	183464949	183467949
2	184595949	184598949
2	184606449	184609449
2	187693053	187696053
2	187765053	187768053
2	187766553	187769553
2	187768053	187771053
2	187769553	187772553
2	187772553	187775553
2	191225517	191228517
2	191227017	191230017
2	192163067	192166067
2	192164567	192167567
2	192166067	192169067
2	194372567	194375567
2	196058553	196061553
2	196067553	196070553
2	196069053	196072053
2	196072053	196075053
2	196073553	196076553
2	207536504	207539504
2	207538004	207541004
2	207539504	207542504
2	207541004	207544004
2	209065004	209068004
2	209615504	209618504
2	210221636	210224636
2	212377136	212380136
2	212387636	212390636
2	212390636	212393636
2	212716136	212719136
2	212717636	212720636
2	212720636	212723636
2	212722136	212725136
2	213187077	213190077
2	214717077	214720077
2	214718577	214721577
2	214720077	214723077
2	214721577	214724577
2	214724577	214727577
2	214732077	214735077
2	214733577	214736577
2	214735077	214738077
2	214736577	214739577
2	214759077	214762077
2	215476077	215479077
2	215630577	215633577
2	215908077	215911077
2	215909577	215912577
2	217246097	217249097
2	218306597	218309597
2	218708597	218711597
2	218711597	218714597
2	218782097	218785097
2	220961536	220964536
2	221062036	221065036
2	221417536	221420536
2	222217115	222220115
2	222218615	222221615
2	223870115	223873115
2	223871615	223874615
2	223945115	223948115
2	225968531	225971531
2	226024031	226027031
2	226025531	226028531
2	226034531	226037531
2	226036031	226039031
2	226046531	226049531
2	226048031	226051031
2	226049531	226052531
2	227978531	227981531
2	227980031	227983031
2	228089628	228092628
2	228091128	228094128
2	228092628	228095628
2	228265128	228268128
2	228466128	228469128
2	228490128	228493128
2	228491628	228494628
2	228535128	228538128
2	228544128	228547128
2	228607128	228610128
2	228994128	228997128
2	229909128	229912128
2	230960628	230963628
2	230996628	230999628
2	231242596	231245596
2	231244096	231247096
2	231328096	231331096
2	231421096	231424096
2	231425596	231428596
2	231427096	231430096
2	231430096	231433096
2	231436096	231439096
2	231437596	231440596
2	231878596	231881596
2	233218096	233221096
2	233426596	233429596
2	233428096	233431096
2	233930596	233933596
2	233932096	233935096
2	234062233	234065233
2	234063733	234066733
2	234065233	234068233
2	235193233	235196233
2	235478233	235481233
2	235506733	235509733
2	235508233	235511233
2	235598233	235601233
2	235668733	235671733
2	235670233	235673233
2	235802233	235805233
2	235803733	235806733
2	236612233	236615233
2	236613733	236616733
2	237154278	237157278
2	237155778	237158778
2	237763278	237766278
2	237764778	237767778
2	237766278	237769278
2	237767778	237770778
2	237808278	237811278
2	238048278	238051278
2	238052778	238055778
2	238054278	238057278
2	238055778	238058778
2	238210278	238213278
2	238211778	238214778
2	238219278	238222278
2	238445778	238448778
2	238495278	238498278
2	238537278	238540278
2	239006778	239009778
2	239488278	239491278
2	239489778	239492778
2	240434512	240437512
2	241018012	241021012
2	241019512	241022512
2	241114012	241117012
2	241118512	241121512
2	241120012	241123012
2	241123012	241126012
2	241199512	241202512
2	241829512	241832512
2	242048512	242051512
3	729678	732678
3	1514178	1517178
3	1637178	1640178
3	1848678	1851678
3	1931178	1934178
3	1932678	1935678
3	2960178	2963178
3	3750565	3753565
3	3767065	3770065
3	3768565	3771565
3	3780565	3783565
3	3782065	3785065
3	4013065	4016065
3	4901065	4904065
3	5714065	5717065
3	6318513	6321513
3	6501513	6504513
3	6728013	6731013
3	7371513	7374513
3	7910013	7913013
3	7923513	7926513
3	7925013	7928013
3	7974513	7977513
3	7983513	7986513
3	7985013	7988013
3	8619513	8622513
3	8753013	8756013
3	10166211	10169211
3	10784211	10787211
3	11034711	11037711
3	12486508	12489508
3	13109008	13112008
3	13110508	13113508
3	13112008	13115008
3	13130008	13133008
3	13257508	13260508
3	13467508	13470508
3	13473508	13476508
3	13475008	13478008
3	13476508	13479508
3	13478008	13481008
3	14126008	14129008
3	14328508	14331508
3	16184010	16187010
3	16358010	16361010
3	20505570	20508570
3	20570070	20573070
3	20576070	20579070
3	20768070	20771070
3	21485214	21488214
3	21987714	21990714
3	21989214	21992214
3	21998214	22001214
3	21999714	22002714
3	22560714	22563714
3	22721214	22724214
3	22941714	22944714
3	23973714	23976714
3	23975214	23978214
3	26502543	26505543
3	26504043	26507043
3	27101041	27104041
3	29750041	29753041
3	30251036	30254036
3	30902036	30905036
3	30903536	30906536
3	31167536	31170536
3	31775036	31778036
3	32207036	32210036
3	32663036	32666036
3	32664536	32667536
3	32666036	32669036
3	32667536	32670536
3	32669036	32672036
3	34712029	34715029
3	34719529	34722529
3	34721029	34724029
3	36210553	36213553
3	39288511	39291511
3	39531511	39534511
3	39537511	39540511
3	39539011	39542011
3	39540511	39543511
3	39954511	39957511
3	39974011	39977011
3	40095511	40098511
3	40097011	40100011
3	40106011	40109011
3	41049511	41052511
3	41370511	41373511
3	41373511	41376511
3	41475511	41478511
3	41583511	41586511
3	41585011	41588011
3	41586511	41589511
3	41594011	41597011
3	41595511	41598511
3	41597011	41600011
3	41598511	41601511
3	41862511	41865511
3	41864011	41867011
3	42335087	42338087
3	42366587	42369587
3	42368087	42371087
3	42369587	42372587
3	42371087	42374087
3	42372587	42375587
3	46667019	46670019
3	46668519	46671519
3	60054529	60057529
3	61049022	61052022
3	61050522	61053522
3	62609022	62612022
3	62610522	62613522
3	62724522	62727522
3	63273562	63276562
3	64913062	64916062
3	64920562	64923562
3	64922062	64925062
3	64974562	64977562
3	65223562	65226562
3	67655062	67658062
3	67656562	67659562
3	67658062	67661062
3	67659562	67662562
3	69410369	69413369
3	69411869	69414869
3	69413369	69416369
3	69414869	69417869
3	69416369	69419369
3	69581369	69584369
3	70346369	70349369
3	70347869	70350869
3	72033869	72036869
3	73365563	73368563
3	73367063	73370063
3	73368563	73371563
3	73376063	73379063
3	73377563	73380563
3	74064563	74067563
3	74112563	74115563
3	74772563	74775563
3	75599072	75602072
3	75600572	75603572
3	75602072	75605072
3	75603572	75606572
3	75605072	75608072
3	75606572	75609572
3	76985072	76988072
3	77601572	77604572
3	77603072	77606072
3	82005069	82008069
3	84410418	84413418
3	84507918	84510918
3	84509418	84512418
3	84510918	84513918
3	85574418	85577418
3	85575918	85578918
3	85583418	85586418
3	86529918	86532918
3	87344059	87347059
3	87345559	87348559
3	87357559	87360559
3	87371059	87374059
3	87374059	87377059
3	87375559	87378559
3	87384559	87387559
3	87398059	87401059
3	87399559	87402559
3	87401059	87404059
3	87612559	87615559
3	88577059	88580059
3	94066955	94069955
3	94204955	94207955
3	95146955	95149955
3	95148455	95151455
3	95149955	95152955
3	95151455	95154455
3	95152955	95155955
3	95154455	95157455
3	95163455	95166455
3	95164955	95167955
3	95166455	95169455
3	95167955	95170955
3	95169455	95172455
3	95170955	95173955
3	95172455	95175455
3	95173955	95176955
3	95175455	95178455
3	95178455	95181455
3	95179955	95182955
3	95182955	95185955
3	95656955	95659955
3	95661455	95664455
3	95664455	95667455
3	95665955	95668955
3	95667455	95670455
3	95668955	95671955
3	95670455	95673455
3	96818065	96821065
3	96819565	96822565
3	97788565	97791565
3	97790065	97793065
3	97793065	97796065
3	97799065	97802065
3	97890565	97893565
3	97899565	97902565
3	97904065	97907065
3	97919065	97922065
3	97920565	97923565
3	97940065	97943065
3	97941565	97944565
3	97943065	97946065
3	97944565	97947565
3	97946065	97949065
3	97955065	97958065
3	98027065	98030065
3	98028565	98031565
3	98742565	98745565
3	98744065	98747065
3	99129504	99132504
3	100811004	100814004
3	100833504	100836504
3	100838004	100841004
3	101634504	101637504
3	101982504	101985504
3	103343165	103346165
3	103350665	103353665
3	103352165	103355165
3	103395665	103398665
3	103464665	103467665
3	103466165	103469165
3	103467665	103470665
3	103748165	103751165
3	103937165	103940165
3	103938665	103941665
3	103940165	103943165
3	103941665	103944665
3	103946165	103949165
3	104238665	104241665
3	104240165	104243165
3	104417165	104420165
3	104418665	104421665
3	104420165	104423165
3	104666165	104669165
3	104804165	104807165
3	105690083	105693083
3	105693083	105696083
3	105694583	105697583
3	105696083	105699083
3	105697583	105700583
3	106011083	106014083
3	106014083	106017083
3	106030583	106033583
3	106032083	106035083
3	106383083	106386083
3	108566109	108569109
3	108876609	108879609
3	109035609	109038609
3	109646109	109649109
3	109647609	109650609
3	109653609	109656609
3	109655109	109658109
3	109985109	109988109
3	111038109	111041109
3	111488192	111491192
3	111926192	111929192
3	111927692	111930692
3	111956192	111959192
3	111957692	111960692
3	111971192	111974192
3	112034192	112037192
3	115526090	115529090
3	115683590	115686590
3	115685090	115688090
3	116801090	116804090
3	116802590	116805590
3	117491107	117494107
3	121639623	121642623
3	121641123	121644123
3	121642623	121645623
3	122299623	122302623
3	122301123	122304123
3	122302623	122305623
3	123097623	123100623
3	123101070	123104070
3	123102570	123105570
3	123104070	123107070
3	123105570	123108570
3	123959070	123962070
3	124290570	124293570
3	124298070	124301070
3	124299570	124302570
3	124304070	124307070
3	124305570	124308570
3	124320570	124323570
3	124322070	124325070
3	124338570	124341570
3	124344570	124347570
3	125844570	125847570
3	125846070	125849070
3	125847570	125850570
3	125849070	125852070
3	125856570	125859570
3	125858070	125861070
3	125943570	125946570
3	125945070	125948070
3	125946570	125949570
3	125948070	125951070
3	125949570	125952570
3	125951070	125954070
3	125952570	125955570
3	126020070	126023070
3	129062020	129065020
3	129063520	129066520
3	129659189	129662189
3	131078189	131081189
3	131079689	131082689
3	131267189	131270189
3	131382689	131385689
3	131384189	131387189
3	131595689	131598689
3	131597189	131600189
3	131598689	131601689
3	131600189	131603189
3	131645189	131648189
3	131646689	131649689
3	131673689	131676689
3	131675189	131678189
3	131676689	131679689
3	131724689	131727689
3	131726189	131729189
3	131937689	131940689
3	132509660	132512660
3	132557660	132560660
3	132685160	132688160
3	133409660	133412660
3	134152160	134155160
3	134153660	134156660
3	136755743	136758743
3	140903086	140906086
3	140909086	140912086
3	143421502	143424502
3	144614037	144617037
3	145233537	145236537
3	145238037	145241037
3	145239537	145242537
3	145698537	145701537
3	145700037	145703037
3	145740537	145743537
3	145743537	145746537
3	145979037	145982037
3	145983537	145986537
3	147827172	147830172
3	148005672	148008672
3	148616172	148619172
3	148622172	148625172
3	149397672	149400672
3	149880672	149883672
3	151925034	151928034
3	151926534	151929534
3	151928034	151931034
3	152240034	152243034
3	153729623	153732623
3	153731123	153734123
3	153735623	153738623
3	153740123	153743123
3	154274123	154277123
3	154275623	154278623
3	154277123	154280123
3	154286123	154289123
3	154287623	154290623
3	154290623	154293623
3	154293623	154296623
3	155034623	155037623
3	157458514	157461514
3	158612014	158615014
3	158613514	158616514
3	161099199	161102199
3	161157699	161160699
3	161778699	161781699
3	161810199	161813199
3	161811699	161814699
3	161813199	161816199
3	161814699	161817699
3	162236492	162239492
3	162237992	162240992
3	162608492	162611492
3	162630992	162633992
3	162633992	162636992
3	162635492	162638492
3	162636992	162639992
3	162639992	162642992
3	162641492	162644492
3	162728492	162731492
3	162731492	162734492
3	162732992	162735992
3	162869492	162872492
3	162870992	162873992
3	163731992	163734992
3	164118992	164121992
3	164180492	164183492
3	164181992	164184992
3	165456576	165459576
3	165462576	165465576
3	165848076	165851076
3	165849576	165852576
3	165851076	165854076
3	165852576	165855576
3	165854076	165857076
3	165857076	165860076
3	165968076	165971076
3	166037076	166040076
3	166044576	166047576
3	170384431	170387431
3	170385931	170388931
3	171014431	171017431
3	171440038	171443038
3	172221538	172224538
3	172658038	172661038
3	172659538	172662538
3	172661038	172664038
3	172662538	172665538
3	172664038	172667038
3	172805038	172808038
3	173061538	173064538
3	173868538	173871538
3	173876038	173879038
3	176504116	176507116
3	176513116	176516116
3	176514616	176517616
3	176516116	176519116
3	176519116	176522116
3	176597116	176600116
3	176598616	176601616
3	177296042	177299042
3	177299042	177302042
3	177461042	177464042
3	178982042	178985042
3	180444570	180447570
3	182451570	182454570
3	183051570	183054570
3	183179306	183182306
3	183180806	183183806
3	183378806	183381806
3	184127306	184130306
3	184406306	184409306
3	184766306	184769306
3	184767806	184770806
3	184776806	184779806
3	186434163	186437163
3	186435663	186438663
3	186437163	186440163
3	186438663	186441663
3	186777663	186780663
3	186779163	186782163
3	189246505	189249505
3	189873505	189876505
3	189875005	189878005
3	189882505	189885505
3	190053505	190056505
3	190055005	190058005
3	190058005	190061005
3	190059505	190062505
3	190061005	190064005
3	190511005	190514005
3	190512505	190515505
3	190514005	190517005
3	190515505	190518505
3	190517005	190520005
3	190685005	190688005
3	190775005	190778005
3	190890505	190893505
3	191180005	191183005
3	191360005	191363005
3	191361505	191364505
3	191366005	191369005
3	191432005	191435005
3	192206112	192209112
3	192450612	192453612
3	192452112	192455112
3	192737112	192740112
3	192822612	192825612
3	192882612	192885612
3	193875612	193878612
3	193944612	193947612
3	193946112	193949112
3	194264112	194267112
3	194265612	194268612
3	194316612	194319612
3	194667612	194670612
3	194669112	194672112
3	194670612	194673612
3	194868612	194871612
3	197144109	197147109
4	528928	531928
4	534928	537928
4	536428	539428
4	537928	540928
4	539428	542428
4	782428	785428
4	1289428	1292428
4	1290928	1293928
4	1293928	1296928
4	1295428	1298428
4	2174428	2177428
4	2175928	2178928
4	2177428	2180428
4	2178928	2181928
4	2180428	2183428
4	2181928	2184928
4	2183428	2186428
4	2184928	2187928
4	2186428	2189428
4	2192428	2195428
4	2369428	2372428
4	2373928	2376928
4	2375428	2378428
4	3792134	3795134
4	3793634	3796634
4	3795134	3798134
4	3796634	3799634
4	3798134	3801134
4	3801134	3804134
4	4243634	4246634
4	4284134	4287134
4	4296134	4299134
4	4348634	4351634
4	4687634	4690634
4	4849634	4852634
4	5310134	5313134
4	5311634	5314634
4	5313134	5316134
4	5314634	5317634
4	5316134	5319134
4	5616134	5619134
4	5617634	5620634
4	5965634	5968634
4	5991134	5994134
4	7215081	7218081
4	7219581	7222581
4	7318581	7321581
4	7320081	7323081
4	7498581	7501581
4	9197018	9200018
4	9951518	9954518
4	9953018	9956018
4	9956018	9959018
4	9957518	9960518
4	9963518	9966518
4	9965018	9968018
4	10724018	10727018
4	11451518	11454518
4	11453018	11456018
4	11948018	11951018
4	12090048	12093048
4	12238548	12241548
4	12546048	12549048
4	12547548	12550548
4	14872548	14875548
4	16417590	16420590
4	17307090	17310090
4	17308590	17311590
4	18748720	18751720
4	20130220	20133220
4	20133220	20136220
4	21114144	21117144
4	21115644	21118644
4	21271644	21274644
4	21489144	21492144
4	21732144	21735144
4	21766644	21769644
4	21768144	21771144
4	21790644	21793644
4	21792144	21795144
4	23602644	23605644
4	24955621	24958621
4	24958621	24961621
4	25000621	25003621
4	25078621	25081621
4	27780106	27783106
4	28917106	28920106
4	28918606	28921606
4	29469106	29472106
4	31437494	31440494
4	31438994	31441994
4	31588994	31591994
4	31590494	31593494
4	31591994	31594994
4	32199494	32202494
4	32251994	32254994
4	32253494	32256494
4	32254994	32257994
4	32337494	32340494
4	32574494	32577494
4	32575994	32578994
4	32577494	32580494
4	32643494	32646494
4	32656994	32659994
4	32658494	32661494
4	32677994	32680994
4	32988494	32991494
4	32989994	32992994
4	32991494	32994494
4	33288119	33291119
4	33729119	33732119
4	33730619	33733619
4	34753619	34756619
4	34758119	34761119
4	34761119	34764119
4	34762619	34765619
4	35512619	35515619
4	35514119	35517119
4	35515619	35518619
4	35604119	35607119
4	35607119	35610119
4	35608619	35611619
4	35610119	35613119
4	36445539	36448539
4	36622539	36625539
4	36624039	36627039
4	36625539	36628539
4	36627039	36630039
4	36628539	36631539
4	36630039	36633039
4	36631539	36634539
4	36996039	36999039
4	37512039	37515039
4	37516539	37519539
4	37518039	37521039
4	37524039	37527039
4	37561539	37564539
4	37786539	37789539
4	37807539	37810539
4	38187039	38190039
4	38194539	38197539
4	38196039	38199039
4	38212539	38215539
4	38784039	38787039
4	38785539	38788539
4	38875539	38878539
4	38877039	38880039
4	38991039	38994039
4	39108044	39111044
4	39109544	39112544
4	39117044	39120044
4	39118544	39121544
4	39120044	39123044
4	41203544	41206544
4	41322044	41325044
4	41590544	41593544
4	41592044	41595044
4	41593544	41596544
4	42178963	42181963
4	42183463	42186463
4	42673963	42676963
4	42675463	42678463
4	42736963	42739963
4	42738463	42741463
4	42739963	42742963
4	42741463	42744463
4	42748963	42751963
4	42753463	42756463
4	42754963	42757963
4	43203463	43206463
4	44661463	44664463
4	44662963	44665963
4	44956963	44959963
4	44958463	44961463
4	44959963	44962963
4	46749928	46752928
4	47543428	47546428
4	47547928	47550928
4	47624428	47627428
4	47625928	47628928
4	48174046	48177046
4	48175546	48178546
4	54376649	54379649
4	54472649	54475649
4	56023649	56026649
4	56025149	56028149
4	56026649	56029649
4	56035649	56038649
4	56037149	56040149
4	56038649	56041649
4	56142149	56145149
4	56143649	56146649
4	57124631	57127631
4	57127631	57130631
4	57523631	57526631
4	57697631	57700631
4	57699131	57702131
4	57747131	57750131
4	57916631	57919631
4	57918131	57921131
4	57919631	57922631
4	58158131	58161131
4	58159631	58162631
4	58161131	58164131
4	58164131	58167131
4	58168631	58171631
4	58192631	58195631
4	58567631	58570631
4	58569131	58572131
4	58570631	58573631
4	58572131	58575131
4	58719131	58722131
4	58720631	58723631
4	58960631	58963631
4	59355131	59358131
4	59608631	59611631
4	59610131	59613131
4	59613131	59616131
4	59628131	59631131
4	59629631	59632631
4	59811131	59814131
4	59812631	59815631
4	60840156	60843156
4	61281156	61284156
4	61282656	61285656
4	61284156	61287156
4	61309656	61312656
4	61342656	61345656
4	61365156	61368156
4	61368156	61371156
4	61369656	61372656
4	61399656	61402656
4	61401156	61404156
4	62032656	62035656
4	63600059	63603059
4	63607559	63610559
4	63612059	63615059
4	63648059	63651059
4	63651059	63654059
4	63652559	63655559
4	63654059	63657059
4	64534559	64537559
4	64536059	64539059
4	64849559	64852559
4	64851059	64854059
4	65263559	65266559
4	65538059	65541059
4	65541059	65544059
4	66751575	66754575
4	66753075	66756075
4	66754575	66757575
4	66993075	66996075
4	68914575	68917575
4	68916075	68919075
4	69347015	69350015
4	69348515	69351515
4	69350015	69353015
4	69593015	69596015
4	69608015	69611015
4	69609515	69612515
4	69614015	69617015
4	70386515	70389515
4	70388015	70391015
4	70389515	70392515
4	70391015	70394015
4	70392515	70395515
4	70395515	70398515
4	70401515	70404515
4	70413515	70416515
4	70415015	70418015
4	70418015	70421015
4	70419515	70422515
4	70422515	70425515
4	70427015	70430015
4	70428515	70431515
4	70487015	70490015
4	71208515	71211515
4	71210015	71213015
4	71211515	71214515
4	71213015	71216015
4	71214515	71217515
4	71250515	71253515
4	71385515	71388515
4	71387015	71390015
4	72072402	72075402
4	72843402	72846402
4	72907902	72910902
4	72939402	72942402
4	73419402	73422402
4	73420902	73423902
4	73431402	73434402
4	73444902	73447902
4	73446402	73449402
4	73447902	73450902
4	73491402	73494402
4	73492902	73495902
4	73494402	73497402
4	73630902	73633902
4	74451402	74454402
4	74452902	74455902
4	75199613	75202613
4	75207113	75210113
4	75208613	75211613
4	75421613	75424613
4	75768113	75771113
4	75769613	75772613
4	76192613	76195613
4	76194113	76197113
4	76302113	76305113
4	76951613	76954613
4	76953113	76956113
4	76954613	76957613
4	76962113	76965113
4	76971113	76974113
4	76972613	76975613
4	76989113	76992113
4	77029613	77032613
4	77073113	77076113
4	77094113	77097113
4	77146613	77149613
4	77284613	77287613
4	77292113	77295113
4	77298113	77301113
4	77299613	77302613
4	77304113	77307113
4	77452613	77455613
4	77454113	77457113
4	77455613	77458613
4	77910113	77913113
4	77913113	77916113
4	77914613	77917613
4	78100699	78103699
4	78223699	78226699
4	78231199	78234199
4	78232699	78235699
4	78234199	78237199
4	78244699	78247699
4	78249199	78252199
4	78258199	78261199
4	78262699	78265699
4	78264199	78267199
4	78291199	78294199
4	78303199	78306199
4	78346699	78349699
4	78348199	78351199
4	78987199	78990199
4	78988699	78991699
4	78990199	78993199
4	79260199	79263199
4	79281199	79284199
4	79282699	79285699
4	79285699	79288699
4	79386199	79389199
4	79419199	79422199
4	79429699	79432699
4	79449199	79452199
4	79452199	79455199
4	79453699	79456699
4	79924699	79927699
4	80808199	80811199
4	82551115	82554115
4	83553115	83556115
4	83554615	83557615
4	83659615	83662615
4	84141083	84144083
4	84142583	84145583
4	84159083	84162083
4	84160583	84163583
4	84169583	84172583
4	84171083	84174083
4	84790583	84793583
4	84825083	84828083
4	84826583	84829583
4	84943583	84946583
4	84945083	84948083
4	86034083	86037083
4	86037083	86040083
4	86103083	86106083
4	86460083	86463083
4	86472083	86475083
4	86475083	86478083
4	86476583	86479583
4	86478083	86481083
4	86479583	86482583
4	86572583	86575583
4	88444825	88447825
4	88669825	88672825
4	88671325	88674325
4	88783825	88786825
4	88786825	88789825
4	88791325	88794325
4	88794325	88797325
4	90165093	90168093
4	90166593	90169593
4	90591093	90594093
4	90592593	90595593
4	91714593	91717593
4	92278593	92281593
4	92280093	92283093
4	93504078	93507078
4	94216578	94219578
4	94803078	94806078
4	96700679	96703679
4	96702179	96705179
4	96745679	96748679
4	96754679	96757679
4	96756179	96759179
4	97423679	97426679
4	97425179	97428179
4	97426679	97429679
4	97428179	97431179
4	97431179	97434179
4	97432679	97435679
4	99019643	99022643
4	99028643	99031643
4	99037643	99040643
4	99039143	99042143
4	99054143	99057143
4	99055643	99058643
4	99786143	99789143
4	100261643	100264643
4	100263143	100266143
4	100264643	100267643
4	100291643	100294643
4	100293143	100296143
4	100294643	100297643
4	100299143	100302143
4	100300643	100303643
4	101479643	101482643
4	103551143	103554143
4	103552643	103555643
4	103554143	103557143
4	104466143	104469143
4	110134656	110137656
4	110139156	110142156
4	110151156	110154156
4	110152656	110155656
4	111019666	111022666
4	111126166	111129166
4	112762666	112765666
4	114018073	114021073
4	114019573	114022573
4	115014073	115017073
4	115140073	115143073
4	115144573	115147573
4	115146073	115149073
4	115411573	115414573
4	115413073	115416073
4	115414573	115417573
4	115416073	115419073
4	115431073	115434073
4	116172073	116175073
4	116173573	116176573
4	116374573	116377573
4	116376073	116379073
4	116389573	116392573
4	116391073	116394073
4	116406073	116409073
4	116415073	116418073
4	116449573	116452573
4	116451073	116454073
4	116452573	116455573
4	116506573	116509573
4	117502604	117505604
4	118651604	118654604
4	120040616	120043616
4	120043616	120046616
4	120045116	120048116
4	120046616	120049616
4	120048116	120051116
4	120235616	120238616
4	120237116	120240116
4	120238616	120241616
4	120240116	120243116
4	122512616	122515616
4	122662616	122665616
4	122664116	122667116
4	122956616	122959616
4	127059044	127062044
4	127060544	127063544
4	127062044	127065044
4	127063544	127066544
4	129592162	129595162
4	129593662	129596662
4	130072162	130075162
4	131050162	131053162
4	131252662	131255662
4	131254162	131257162
4	131596162	131599162
4	131614162	131617162
4	131843662	131846662
4	131845162	131848162
4	131846662	131849662
4	133551069	133554069
4	133644069	133647069
4	133764069	133767069
4	133765569	133768569
4	133849569	133852569
4	135885046	135888046
4	137403046	137406046
4	137941546	137944546
4	138366062	138369062
4	139569062	139572062
4	142962113	142965113
4	143892113	143895113
4	143938613	143941613
4	144655655	144658655
4	144657155	144660155
4	144658655	144661655
4	145195655	145198655
4	145197155	145200155
4	147943573	147946573
4	147945073	147948073
4	148023073	148026073
4	153906150	153909150
4	153907650	153910650
4	153909150	153912150
4	154746150	154749150
4	154761150	154764150
4	154951650	154954650
4	155359650	155362650
4	155403150	155406150
4	155404650	155407650
4	155766150	155769150
4	155775150	155778150
4	155802150	155805150
4	156097572	156100572
4	156099072	156102072
4	156100572	156103572
4	156109572	156112572
4	157363572	157366572
4	157509072	157512072
4	158442072	158445072
4	158443572	158446572
4	159330943	159333943
4	159333943	159336943
4	159342943	159345943
4	159350443	159353443
4	159351943	159354943
4	159357943	159360943
4	159359443	159362443
4	159360943	159363943
4	159365443	159368443
4	159369943	159372943
4	159371443	159374443
4	159375943	159378943
4	159377443	159380443
4	160661443	160664443
4	160664443	160667443
4	161472943	161475943
4	161682943	161685943
4	161684443	161687443
4	162028665	162031665
4	162030165	162033165
4	162223665	162226665
4	162225165	162228165
4	162226665	162229665
4	162231165	162234165
4	162235665	162238665
4	163260165	163263165
4	163261665	163264665
4	163263165	163266165
4	163264665	163267665
4	163266165	163269165
4	163492665	163495665
4	163722165	163725165
4	163807665	163810665
4	164301165	164304165
4	165090051	165093051
4	165091551	165094551
4	165711051	165714051
4	165712551	165715551
4	165966051	165969051
4	166086051	166089051
4	166263051	166266051
4	166336551	166339551
4	166338051	166341051
4	166344051	166347051
4	166345551	166348551
4	166347051	166350051
4	166348551	166351551
4	166350051	166353051
4	166452051	166455051
4	166453551	166456551
4	166528551	166531551
4	166530051	166533051
4	167199051	167202051
4	167212551	167215551
4	168262589	168265589
4	168274589	168277589
[truncated: 4,841 more rows]

## Sheet: SIGNIF_tf0.4_YRI
1	4003620	4006620
1	4392120	4395120
1	4459620	4462620
1	4597620	4600620
1	4599120	4602120
1	5328120	5331120
1	8158702	8161702
1	9271702	9274702
1	14424088	14427088
1	14425588	14428588
1	14457088	14460088
1	14458588	14461588
1	14460088	14463088
1	15282088	15285088
1	15456088	15459088
1	15457588	15460588
1	15459088	15462088
1	15510088	15513088
1	15511588	15514588
1	15555088	15558088
1	16374105	16377105
1	16378605	16381605
1	17400105	17403105
1	17401605	17404605
1	17421105	17424105
1	17422605	17425605
1	17649105	17652105
1	17656605	17659605
1	17716605	17719605
1	17718105	17721105
1	18121605	18124605
1	18123105	18126105
1	18804105	18807105
1	19090624	19093624
1	19093624	19096624
1	19200124	19203124
1	19936624	19939624
1	20017624	20020624
1	21895608	21898608
1	22306608	22309608
1	22360608	22363608
1	24199608	24202608
1	24207108	24210108
1	24376608	24379608
1	24927282	24930282
1	24928782	24931782
1	24930282	24933282
1	24931782	24934782
1	24933282	24936282
1	24934782	24937782
1	25180782	25183782
1	25182282	25185282
1	25299282	25302282
1	26167782	26170782
1	26428782	26431782
1	29781214	29784214
1	29802214	29805214
1	30369214	30372214
1	30738214	30741214
1	30990085	30993085
1	30991585	30994585
1	31063585	31066585
1	31074085	31077085
1	31075585	31078585
1	31671085	31674085
1	34038416	34041416
1	34039916	34042916
1	34599416	34602416
1	34654916	34657916
1	34656416	34659416
1	37878337	37881337
1	40153593	40156593
1	46811271	46814271
1	46812771	46815771
1	46814271	46817271
1	46815771	46818771
1	46817271	46820271
1	49176441	49179441
1	53487261	53490261
1	53488761	53491761
1	53500761	53503761
1	54156261	54159261
1	55192612	55195612
1	57067612	57070612
1	57069112	57072112
1	57444112	57447112
1	57445612	57448612
1	59020753	59023753
1	59142253	59145253
1	59236753	59239753
1	59464753	59467753
1	59466253	59469253
1	59467753	59470753
1	62688291	62691291
1	62766291	62769291
1	64156935	64159935
1	64158435	64161435
1	64659435	64662435
1	64660935	64663935
1	64771935	64774935
1	66126435	66129435
1	66127935	66130935
1	66130935	66133935
1	66132435	66135435
1	66133935	66136935
1	66156435	66159435
1	68871088	68874088
1	70582095	70585095
1	71012595	71015595
1	73554108	73557108
1	73851108	73854108
1	77104933	77107933
1	77106433	77109433
1	77107933	77110933
1	77109433	77112433
1	77110933	77113933
1	77112433	77115433
1	77209933	77212933
1	78630433	78633433
1	78631933	78634933
1	78633433	78636433
1	80847101	80850101
1	81400601	81403601
1	81402101	81405101
1	81955670	81958670
1	81957170	81960170
1	83143670	83146670
1	83145170	83148170
1	83163170	83166170
1	83164670	83167670
1	83166170	83169170
1	86457087	86460087
1	86458587	86461587
1	86469087	86472087
1	86470587	86473587
1	86475087	86478087
1	86481087	86484087
1	87612087	87615087
1	87613587	87616587
1	89382150	89385150
1	89458650	89461650
1	89896650	89899650
1	89919150	89922150
1	90531150	90534150
1	91641143	91644143
1	91642643	91645643
1	91644143	91647143
1	91653143	91656143
1	92095643	92098643
1	92389643	92392643
1	92391143	92394143
1	93520643	93523643
1	94212150	94215150
1	94228650	94231650
1	94230150	94233150
1	94239150	94242150
1	94240650	94243650
1	94245150	94248150
1	94246650	94249650
1	94248150	94251150
1	94266150	94269150
1	94440150	94443150
1	94443150	94446150
1	94444650	94447650
1	94461150	94464150
1	94465650	94468650
1	94467150	94470150
1	95133150	95136150
1	95148150	95151150
1	95149650	95152650
1	95151150	95154150
1	95155650	95158650
1	95193150	95196150
1	99192209	99195209
1	100149083	100152083
1	100150583	100153583
1	100933583	100936583
1	101031083	101034083
1	101032583	101035583
1	101034083	101037083
1	101850083	101853083
1	102067583	102070583
1	102069083	102072083
1	102084083	102087083
1	102085583	102088583
1	102234083	102237083
1	102235583	102238583
1	102378083	102381083
1	102828083	102831083
1	102829583	102832583
1	102834085	102837085
1	102861085	102864085
1	103593085	103596085
1	103594585	103597585
1	103612585	103615585
1	103614085	103617085
1	103615585	103618585
1	103617085	103620085
1	104628085	104631085
1	105234085	105237085
1	105498085	105501085
1	105499585	105502585
1	105501085	105504085
1	105505585	105508585
1	105507085	105510085
1	105790585	105793585
1	106105068	106108068
1	106106568	106109568
1	106108068	106111068
1	106109568	106112568
1	106111068	106114068
1	106112568	106115568
1	106114068	106117068
1	106115568	106118568
1	106117068	106120068
1	106127568	106130568
1	106720068	106723068
1	108500568	108503568
1	108562068	108565068
1	108565068	108568068
1	108566568	108569568
1	109366525	109369525
1	110814025	110817025
1	111574525	111577525
1	111580525	111583525
1	111582025	111585025
1	111795025	111798025
1	111828025	111831025
1	111829525	111832525
1	112665306	112668306
1	114526806	114529806
1	116089603	116092603
1	116283103	116286103
1	116284603	116287603
1	116329603	116332603
1	116730103	116733103
1	116731603	116734603
1	116733103	116736103
1	116734603	116737603
1	116737603	116740603
1	117472603	117475603
1	117474103	117477103
1	117475603	117478603
1	117477103	117480103
1	117871592	117874592
1	118354592	118357592
1	120084092	120087092
1	120085592	120088592
1	120331592	120334592
1	120333092	120336092
1	120334592	120337592
1	149996646	149999646
1	152607210	152610210
1	152691210	152694210
1	152692710	152695710
1	152964210	152967210
1	152970210	152973210
1	152971710	152974710
1	152973210	152976210
1	152982210	152985210
1	153001710	153004710
1	153003210	153006210
1	153004710	153007710
1	153132210	153135210
1	153133710	153136710
1	153319710	153322710
1	153321210	153324210
1	157129769	157132769
1	157131269	157134269
1	157195769	157198769
1	157203269	157206269
1	157204769	157207769
1	157596269	157599269
1	157597769	157600769
1	158377769	158380769
1	158463269	158466269
1	158496269	158499269
1	158497769	158500769
1	158503769	158506769
1	158505269	158508269
1	158712269	158715269
1	158713769	158716769
1	158722769	158725769
1	158733269	158736269
1	158839769	158842769
1	158841269	158844269
1	159460769	159463769
1	160146091	160149091
1	160404091	160407091
1	160854091	160857091
1	162028591	162031591
1	162030091	162033091
1	162835591	162838591
1	165621091	165624091
1	167524617	167527617
1	167526117	167529117
1	168459117	168462117
1	170832093	170835093
1	171168093	171171093
1	171652593	171655593
1	172449091	172452091
1	175057672	175060672
1	175059172	175062172
1	179415320	179418320
1	179437820	179440820
1	179443820	179446820
1	179448320	179451320
1	179449820	179452820
1	179451320	179454320
1	179457320	179460320
1	179686820	179689820
1	181107132	181110132
1	181158132	181161132
1	181159632	181162632
1	181161132	181164132
1	181182132	181185132
1	181203132	181206132
1	182964132	182967132
1	183112632	183115632
1	183114132	183117132
1	183154632	183157632
1	183156132	183159132
1	183159132	183162132
1	183160632	183163632
1	183264132	183267132
1	183295632	183298632
1	183297132	183300132
1	183558132	183561132
1	183561132	183564132
1	183592632	183595632
1	183597132	183600132
1	183601632	183604632
1	183607632	183610632
1	183639132	183642132
1	183652632	183655632
1	185526276	185529276
1	185527776	185530776
1	185665776	185668776
1	185853276	185856276
1	187752116	187755116
1	187753616	187756616
1	188241116	188244116
1	188251616	188254616
1	188298116	188301116
1	188320616	188323616
1	188322116	188325116
1	188323616	188326616
1	188325116	188328116
1	188326616	188329616
1	188445116	188448116
1	188457116	188460116
1	188865116	188868116
1	189087116	189090116
1	189094616	189097616
1	189616616	189619616
1	189619616	189622616
1	189627116	189630116
1	189643616	189646616
1	189645116	189648116
1	189646616	189649616
1	192547612	192550612
1	192549112	192552112
1	192582112	192585112
1	192678112	192681112
1	194035729	194038729
1	194067229	194070229
1	194068729	194071729
1	194379229	194382229
1	194385229	194388229
1	194386729	194389729
1	194388229	194391229
1	194389729	194392729
1	195042229	195045229
1	195043729	195046729
1	195049729	195052729
1	195084229	195087229
1	195085729	195088729
1	195087229	195090229
1	195088729	195091729
1	195090229	195093229
1	195093229	195096229
1	195102229	195105229
1	195775729	195778729
1	195801229	195804229
1	195802729	195805729
1	195804229	195807229
1	195805729	195808729
1	195820729	195823729
1	195822229	195825229
1	195823729	195826729
1	195825229	195828229
1	195826729	195829729
1	195828229	195831229
1	195829729	195832729
1	195835607	195838607
1	195913607	195916607
1	195915107	195918107
1	199356126	199359126
1	199602126	199605126
1	200691126	200694126
1	200692626	200695626
1	201217626	201220626
1	201474126	201477126
1	201943622	201946622
1	201945122	201948122
1	201952622	201955622
1	201954122	201957122
1	203653622	203656622
1	204285122	204288122
1	204790622	204793622
1	204904645	204907645
1	204906145	204909145
1	205302145	205305145
1	205303645	205306645
1	205506145	205509145
1	205507645	205510645
1	207204145	207207145
1	208128806	208131806
1	211691153	211694153
1	211703153	211706153
1	211704653	211707653
1	212763653	212766653
1	213650153	213653153
1	213651653	213654653
1	213653153	213656153
1	214290097	214293097
1	217006667	217009667
1	217587167	217590167
1	218188667	218191667
1	219786167	219789167
1	219921340	219924340
1	219958840	219961840
1	219960340	219963340
1	220141840	220144840
1	220494340	220497340
1	220495840	220498840
1	220497340	220500340
1	220944340	220947340
1	221820340	221823340
1	221830840	221833840
1	221844340	221847340
1	222703840	222706840
1	223639745	223642745
1	224259245	224262245
1	224274245	224277245
1	224275745	224278745
1	224277245	224280245
1	224779745	224782745
1	226635104	226638104
1	226636604	226639604
1	227389604	227392604
1	227479604	227482604
1	227502104	227505104
1	228964673	228967673
1	228966173	228969173
1	228967673	228970673
1	228969173	228972173
1	230500673	230503673
1	230503673	230506673
1	230505173	230508173
1	230881673	230884673
1	231210173	231213173
1	231729173	231732173
1	232137088	232140088
1	232270588	232273588
1	232272088	232275088
1	232275088	232278088
1	233281588	233284588
1	233518588	233521588
1	233521588	233524588
1	233523088	233526088
1	233524588	233527588
1	234126088	234129088
1	234130588	234133588
1	234132088	234135088
1	234133588	234136588
1	236379132	236382132
1	236383632	236386632
1	236385132	236388132
1	236518632	236521632
1	236520132	236523132
1	236526132	236529132
1	236667132	236670132
1	236700132	236703132
1	236701632	236704632
1	236706132	236709132
1	236707632	236710632
1	236709132	236712132
1	236713632	236716632
1	236745132	236748132
1	236746632	236749632
1	236793132	236796132
1	237613632	237616632
1	237684132	237687132
1	237685632	237688632
1	237724632	237727632
1	237726132	237729132
1	237736632	237739632
1	237738132	237741132
1	237739632	237742632
1	237741132	237744132
1	237742632	237745632
1	238414627	238417627
1	238471627	238474627
1	238474627	238477627
1	238504627	238507627
1	238629127	238632127
1	238635127	238638127
1	238732627	238735627
1	238852627	238855627
1	238854127	238857127
1	240172627	240175627
1	240174127	240177127
1	240177127	240180127
1	240178627	240181627
1	240217627	240220627
1	240219127	240222127
1	240220627	240223627
1	240597127	240600127
1	240601627	240604627
1	241890156	241893156
1	241891656	241894656
1	242404656	242407656
1	242661156	242664156
1	244680360	244683360
1	246379860	246382860
1	246399360	246402360
1	246415860	246418860
1	246417360	246420360
1	246432360	246435360
1	246708360	246711360
1	246712860	246715860
1	247245256	247248256
1	247614256	247617256
1	247617256	247620256
1	247621756	247624756
1	247623256	247626256
1	247624756	247627756
1	247815256	247818256
1	247947256	247950256
1	247965256	247968256
1	248124256	248127256
1	248140756	248143756
1	248514256	248517256
1	248548756	248551756
1	248575756	248578756
1	248866756	248869756
2	616056	619056
2	617556	620556
2	850056	853056
2	851556	854556
2	860556	863556
2	1115556	1118556
2	1117056	1120056
2	1118556	1121556
2	1138056	1141056
2	1139556	1142556
2	1141056	1144056
2	1142556	1145556
2	1237056	1240056
2	1238556	1241556
2	1259556	1262556
2	1363056	1366056
2	1364556	1367556
2	1367556	1370556
2	1640556	1643556
2	2608056	2611056
2	4861026	4864026
2	6278600	6281600
2	6284600	6287600
2	6332600	6335600
2	7630100	7633100
2	7676600	7679600
2	7678100	7681100
2	8438600	8441600
2	8728100	8731100
2	10133577	10136577
2	10367577	10370577
2	10669077	10672077
2	11018577	11021577
2	12310027	12313027
2	15163065	15166065
2	15164565	15167565
2	15538065	15541065
2	15593565	15596565
2	16435065	16438065
2	16661565	16664565
2	16664565	16667565
2	17059065	17062065
2	17986065	17989065
2	17989065	17992065
2	18260629	18263629
2	18263629	18266629
2	18265129	18268129
2	18277129	18280129
2	18589129	18592129
2	18590629	18593629
2	18592129	18595129
2	18593629	18596629
2	18596629	18599629
2	18598129	18601129
2	18599629	18602629
2	18601129	18604129
2	18604129	18607129
2	18605629	18608629
2	18610129	18613129
2	18656629	18659629
2	18658129	18661129
2	18709129	18712129
2	19792129	19795129
2	19916629	19919629
2	21382111	21385111
2	23540611	23543611
2	28575450	28578450
2	28819950	28822950
2	31270130	31273130
2	31396130	31399130
2	31397630	31400630
2	31409630	31412630
2	31502630	31505630
2	33400103	33403103
2	33401603	33404603
2	33403103	33406103
2	33404603	33407603
2	33406103	33409103
2	34139603	34142603
2	34147103	34150103
2	34183103	34186103
2	34184603	34187603
2	35869103	35872103
2	35873603	35876603
2	35875103	35878103
2	35876603	35879603
2	35878103	35881103
2	35879603	35882603
2	35881103	35884103
2	35882603	35885603
2	35885603	35888603
2	35887103	35890103
2	35903603	35906603
2	35905103	35908103
2	35936603	35939603
2	36116529	36119529
2	36118029	36121029
2	36130029	36133029
2	36895029	36898029
2	36928029	36931029
2	37045029	37048029
2	37046529	37049529
2	38054529	38057529
2	38056029	38059029
2	38057529	38060529
2	38059029	38062029
2	38060529	38063529
2	38062029	38065029
2	38063529	38066529
2	38482029	38485029
2	38686029	38689029
2	38687529	38690529
2	40115804	40118804
2	41939804	41942804
2	41963804	41966804
2	41965304	41968304
2	42242524	42245524
2	43342024	43345024
2	43343524	43346524
2	43883524	43886524
2	45209539	45212539
2	45211039	45214039
2	47489539	47492539
2	48937028	48940028
2	50216528	50219528
2	50224028	50227028
2	50225528	50228528
2	50245028	50248028
2	52306023	52309023
2	52721523	52724523
2	52897023	52900023
2	52931523	52934523
2	52999023	53002023
2	53053023	53056023
2	54805027	54808027
2	64660132	64663132
2	65783632	65786632
2	66010008	66013008
2	66094008	66097008
2	68027508	68030508
2	68029008	68032008
2	68173008	68176008
2	68599008	68602008
2	68600508	68603508
2	69149524	69152524
2	69190024	69193024
2	69191524	69194524
2	69193024	69196024
2	69221524	69224524
2	69223024	69226024
2	69224524	69227524
2	69226024	69229024
2	69442024	69445024
2	69851524	69854524
2	70040524	70043524
2	71050024	71053024
2	71051524	71054524
2	71053024	71056024
2	71692024	71695024
2	71732524	71735524
2	73366147	73369147
2	74968147	74971147
2	75559453	75562453
2	75560953	75563953
2	77221453	77224453
2	77963953	77966953
2	79138061	79141061
2	79139561	79142561
2	79141061	79144061
2	79142561	79145561
2	79225061	79228061
2	79226561	79229561
2	79228061	79231061
2	79229561	79232561
2	83225537	83228537
2	83227037	83230037
2	84053636	84056636
2	84055136	84058136
2	84056636	84059636
2	84199136	84202136
2	84200636	84203636
2	84440636	84443636
2	85924136	85927136
2	85925636	85928636
2	85927136	85930136
2	88736527	88739527
2	100982511	100985511
2	101041011	101044011
2	101060511	101063511
2	101063511	101066511
2	101071011	101074011
2	101072511	101075511
2	101078511	101081511
2	101081511	101084511
2	101083011	101086011
2	101084511	101087511
2	101245011	101248011
2	101246511	101249511
2	102050575	102053575
2	102052075	102055075
2	102053575	102056575
2	102055075	102058075
2	102056575	102059575
2	102178075	102181075
2	102725575	102728575
2	102967075	102970075
2	106124508	106127508
2	106126008	106129008
2	106144008	106147008
2	106615008	106618008
2	109928594	109931594
2	109930094	109933094
2	109931594	109934594
2	109933094	109936094
2	113821921	113824921
2	113838421	113841421
2	117227545	117230545
2	117229045	117232045
2	117592045	117595045
2	117724045	117727045
2	118400545	118403545
2	121462074	121465074
2	121463574	121466574
2	121466574	121469574
2	121468074	121471074
2	121796574	121799574
2	121798074	121801074
2	121894074	121897074
2	122054574	122057574
2	122572074	122575074
2	123842512	123845512
2	123920512	123923512
2	124274512	124277512
2	125299012	125302012
2	127526509	127529509
2	127684009	127687009
2	127685509	127688509
2	127687009	127690009
2	127723009	127726009
2	127724509	127727509
2	129343029	129346029
2	129344529	129347529
2	129346029	129349029
2	129356529	129359529
2	129358029	129361029
2	129505029	129508029
2	131644029	131647029
2	133642593	133645593
2	135416518	135419518
2	137257018	137260018
2	137962018	137965018
2	137963518	137966518
2	137965018	137968018
2	137966518	137969518
2	137968018	137971018
2	137978518	137981518
2	137980018	137983018
2	137981518	137984518
2	138446771	138449771
2	138706271	138709271
2	140165771	140168771
2	142007519	142010519
2	142091519	142094519
2	142096019	142099019
2	142228019	142231019
2	142229519	142232519
2	142231019	142234019
2	142232519	142235519
2	143554019	143557019
2	149198536	149201536
2	150001036	150004036
2	150002536	150005536
2	150005536	150008536
2	150007036	150010036
2	150607065	150610065
2	150608565	150611565
2	150610065	150613065
2	150617565	150620565
2	150619065	150622065
2	150620565	150623565
2	150622065	150625065
2	150623565	150626565
2	151871565	151874565
2	151873065	151876065
2	153215642	153218642
2	155255642	155258642
2	158957556	158960556
2	160073639	160076639
2	160075139	160078139
2	160582139	160585139
2	160697639	160700639
2	160699139	160702139
2	165041547	165044547
2	165043047	165046047
2	166918047	166921047
2	167449047	167452047
2	167450547	167453547
2	168653137	168656137
2	168654637	168657637
2	168873637	168876637
2	169029637	169032637
2	169032637	169035637
2	169034137	169037137
2	169499137	169502137
2	169500637	169503637
2	169827637	169830637
2	170630137	170633137
2	170631637	170634637
2	170633137	170636137
2	170637637	170640637
2	171134794	171137794
2	171146794	171149794
2	171148294	171151294
2	171151294	171154294
2	172049794	172052794
2	172373794	172376794
2	172375294	172378294
2	172376794	172379794
2	172378294	172381294
2	173044294	173047294
2	173062294	173065294
2	173072794	173075794
2	173843794	173846794
2	173845294	173848294
2	173846794	173849794
2	174518501	174521501
2	174592001	174595001
2	174593501	174596501
2	176333501	176336501
2	176398001	176401001
2	176399501	176402501
2	178528072	178531072
2	178531072	178534072
2	178678072	178681072
2	179932072	179935072
2	181790533	181793533
2	182992033	182995033
2	182993533	182996533
2	183352449	183355449
2	183464949	183467949
2	183466449	183469449
2	184595949	184598949
2	187765053	187768053
2	187766553	187769553
2	187768053	187771053
2	189056517	189059517
2	190316517	190319517
2	192163067	192166067
2	192164567	192167567
2	192166067	192169067
2	194366567	194369567
2	194372567	194375567
2	196066053	196069053
2	196067553	196070553
2	196069053	196072053
2	196072053	196075053
2	196073553	196076553
2	196075053	196078053
2	197084553	197087553
2	197323053	197326053
2	207580004	207583004
2	209018504	209021504
2	209020004	209023004
2	209065004	209068004
2	209066504	209069504
2	209615504	209618504
2	212387636	212390636
2	212389136	212392136
2	212390636	212393636
2	213088077	213091077
2	213187077	213190077
2	214717077	214720077
2	214718577	214721577
2	214720077	214723077
2	214721577	214724577
2	214724577	214727577
2	214730577	214733577
2	214732077	214735077
2	214733577	214736577
2	214735077	214738077
2	214736577	214739577
2	215476077	215479077
2	215630577	215633577
2	215632077	215635077
2	215906577	215909577
2	215908077	215911077
2	215909577	215912577
2	217571597	217574597
2	218479097	218482097
2	218707097	218710097
2	218710097	218713097
2	218711597	218714597
2	218782097	218785097
2	218783597	218786597
2	220573036	220576036
2	220961536	220964536
2	222217115	222220115
2	223103615	223106615
2	223868615	223871615
2	223870115	223873115
2	223871615	223874615
2	224885615	224888615
2	225230531	225233531
2	225232031	225235031
2	226024031	226027031
2	226025531	226028531
2	226033031	226036031
2	226034531	226037531
2	226036031	226039031
2	226046531	226049531
2	226048031	226051031
2	226049531	226052531
2	226888031	226891031
2	227978531	227981531
2	228091128	228094128
2	228092628	228095628
2	228466128	228469128
2	228469128	228472128
2	228490128	228493128
2	228491628	228494628
2	228535128	228538128
2	228536628	228539628
2	228607128	228610128
2	228994128	228997128
2	229925628	229928628
2	230959128	230962128
2	230960628	230963628
2	230995128	230998128
2	231005628	231008628
2	231421096	231424096
2	231425596	231428596
2	231427096	231430096
2	231430096	231433096
2	231437596	231440596
2	231877096	231880096
2	231880096	231883096
2	233218096	233221096
2	233426596	233429596
2	233428096	233431096
2	233930596	233933596
2	233960596	233963596
2	233998096	234001096
2	234062233	234065233
2	234063733	234066733
2	234065233	234068233
2	234960733	234963733
2	235191733	235194733
2	235214233	235217233
2	235508233	235511233
2	235598233	235601233
2	235668733	235671733
2	235671733	235674733
2	235802233	235805233
2	235803733	235806733
2	236180233	236183233
2	236610733	236613733
2	236612233	236615233
2	237154278	237157278
2	237155778	237158778
2	237763278	237766278
2	237767778	237770778
2	237769278	237772278
2	238046778	238049778
2	238048278	238051278
2	238049778	238052778
2	238051278	238054278
2	238052778	238055778
2	238054278	238057278
2	238055778	238058778
2	238210278	238213278
2	238211778	238214778
2	238219278	238222278
2	238457778	238460778
2	238495278	238498278
2	241018012	241021012
2	241019512	241022512
2	241114012	241117012
2	241115512	241118512
2	241118512	241121512
2	241120012	241123012
2	241199512	241202512
2	242048512	242051512
3	668178	671178
3	728178	731178
3	729678	732678
3	1197678	1200678
3	1512678	1515678
3	1514178	1517178
3	1637178	1640178
3	1670178	1673178
3	1848678	1851678
3	1931178	1934178
3	1932678	1935678
3	2955678	2958678
3	2960178	2963178
3	3767065	3770065
3	3768565	3771565
3	3776065	3779065
3	3983065	3986065
3	4013065	4016065
3	4014565	4017565
3	5147065	5150065
3	5714065	5717065
3	7620513	7623513
3	7904013	7907013
3	7910013	7913013
3	7922013	7925013
3	7923513	7926513
3	7926513	7929513
3	7974513	7977513
3	7985013	7988013
3	8177013	8180013
3	8178513	8181513
3	8181513	8184513
3	8963013	8966013
3	10784211	10787211
3	12486508	12489508
3	13109008	13112008
3	13110508	13113508
3	13130008	13133008
3	13257508	13260508
3	13467508	13470508
3	13473508	13476508
3	13475008	13478008
3	13476508	13479508
3	13478008	13481008
3	13481008	13484008
3	14126008	14129008
3	14127508	14130508
3	14129008	14132008
3	14133508	14136508
3	14135008	14138008
3	14136508	14139508
3	14328508	14331508
3	16184010	16187010
3	16185510	16188510
3	16358010	16361010
3	18819570	18822570
3	20505570	20508570
3	20511570	20514570
3	20513070	20516070
3	20570070	20573070
3	20571570	20574570
3	20768070	20771070
3	21485214	21488214
3	21957714	21960714
3	21959214	21962214
3	21998214	22001214
3	21999714	22002714
3	22560714	22563714
3	22562214	22565214
3	22944714	22947714
3	22946214	22949214
3	23975214	23978214
3	26502543	26505543
3	27662041	27665041
3	28149541	28152541
3	28151041	28154041
3	29406541	29409541
3	29762041	29765041
3	29789041	29792041
3	30251036	30254036
3	30417536	30420536
3	30902036	30905036
3	30903536	30906536
3	31775036	31778036
3	31776536	31779536
3	32663036	32666036
3	32664536	32667536
3	32666036	32669036
3	32667536	32670536
3	32670536	32673536
3	33023036	33026036
3	34268029	34271029
3	34269529	34272529
3	34712029	34715029
3	34721029	34724029
3	36204553	36207553
3	36207553	36210553
3	36209053	36212053
3	36210553	36213553
3	36212053	36215053
3	36213553	36216553
3	39288511	39291511
3	39290011	39293011
3	39515011	39518011
3	39531511	39534511
3	39537511	39540511
3	39539011	39542011
3	39540511	39543511
3	39548011	39551011
3	39951511	39954511
3	39953011	39956011
3	39972511	39975511
3	40094011	40097011
3	40095511	40098511
3	40097011	40100011
3	40103011	40106011
3	40104511	40107511
3	40106011	40109011
3	40407511	40410511
3	41049511	41052511
3	41373511	41376511
3	41375011	41378011
3	41475511	41478511
3	41585011	41588011
3	41586511	41589511
3	41589511	41592511
3	41594011	41597011
3	41595511	41598511
3	41597011	41600011
3	41862511	41865511
3	41864011	41867011
3	42335087	42338087
3	42368087	42371087
3	42369587	42372587
3	42371087	42374087
3	46778019	46781019
3	46782519	46785519
3	59411029	59414029
3	60110022	60113022
3	61049022	61052022
3	61050522	61053522
3	61052022	61055022
3	62684022	62687022
3	62714022	62717022
3	62723022	62726022
3	63272062	63275062
3	64098562	64101562
3	64920562	64923562
3	64974562	64977562
3	65852062	65855062
3	67655062	67658062
3	67656562	67659562
3	67658062	67661062
3	67659562	67662562
3	69413369	69416369
3	69414869	69417869
3	69416369	69419369
3	69581369	69584369
3	70346369	70349369
3	70347869	70350869
3	72231563	72234563
3	73365563	73368563
3	73367063	73370063
3	73368563	73371563
3	73376063	73379063
3	73824563	73827563
3	73826063	73829063
3	74768063	74771063
3	74772563	74775563
3	75599072	75602072
3	75600572	75603572
3	75602072	75605072
3	75603572	75606572
3	75605072	75608072
3	75606572	75609572
3	75759572	75762572
3	76116572	76119572
3	76985072	76988072
3	77601572	77604572
3	79958044	79961044
3	84507918	84510918
3	84509418	84512418
3	84510918	84513918
3	84512418	84515418
3	86529918	86532918
3	87344059	87347059
3	87345559	87348559
3	87347059	87350059
3	87374059	87377059
3	87375559	87378559
3	87398059	87401059
3	87399559	87402559
3	87401059	87404059
3	94204955	94207955
3	94206455	94209455
3	95140955	95143955
3	95146955	95149955
3	95148455	95151455
3	95149955	95152955
3	95151455	95154455
3	95155955	95158955
3	95164955	95167955
3	95167955	95170955
3	95169455	95172455
3	95170955	95173955
3	95172455	95175455
3	95173955	95176955
3	95179955	95182955
3	95656955	95659955
3	95661455	95664455
3	95665955	95668955
3	95667455	95670455
3	95668955	95671955
3	95670455	95673455
3	96818065	96821065
3	96819565	96822565
3	97788565	97791565
3	97790065	97793065
3	97793065	97796065
3	97800565	97803565
3	97890565	97893565
3	97892065	97895065
3	97898065	97901065
3	97899565	97902565
3	97904065	97907065
3	97905565	97908565
3	97907065	97910065
3	97919065	97922065
3	97920565	97923565
3	97934065	97937065
3	97935565	97938565
3	97938565	97941565
3	97940065	97943065
3	97941565	97944565
3	97946065	97949065
3	97947565	97950565
3	97950565	97953565
3	97955065	97958065
3	97983565	97986565
3	98027065	98030065
3	98028565	98031565
3	98726065	98729065
3	98727565	98730565
3	98735065	98738065
3	98736565	98739565
3	98738065	98741065
3	98741065	98744065
3	98742565	98745565
3	98744065	98747065
3	98745565	98748565
3	98747065	98750065
3	98748565	98751565
3	98751565	98754565
3	98765065	98768065
3	99129504	99132504
3	99131004	99134004
3	99132504	99135504
3	99134004	99137004
3	99135504	99138504
3	100809504	100812504
3	100811004	100814004
3	101976504	101979504
3	103350665	103353665
3	103466165	103469165
3	103794665	103797665
3	103938665	103941665
3	104237165	104240165
3	104238665	104241665
3	104417165	104420165
3	104418665	104421665
3	104420165	104423165
3	104666165	104669165
3	105690083	105693083
3	105691583	105694583
3	105693083	105696083
3	105694583	105697583
3	105696083	105699083
3	106011083	106014083
3	106012583	106015583
3	106030583	106033583
3	106032083	106035083
3	106033583	106036583
3	106362083	106365083
3	106383083	106386083
3	107701583	107704583
3	108876609	108879609
3	109647609	109650609
3	109652109	109655109
3	109653609	109656609
3	109655109	109658109
3	110154609	110157609
3	111036609	111039609
3	111926192	111929192
3	111927692	111930692
3	111956192	111959192
3	111957692	111960692
3	111971192	111974192
3	111990692	111993692
3	112025192	112028192
3	112844192	112847192
3	112850192	112853192
3	112851692	112854692
3	114488090	114491090
3	115683590	115686590
3	116801090	116804090
3	116802590	116805590
3	119289607	119292607
3	121639623	121642623
3	121641123	121644123
3	121642623	121645623
3	122298123	122301123
3	122299623	122302623
3	122302623	122305623
3	123101070	123104070
3	123102570	123105570
3	123104070	123107070
3	124290570	124293570
3	124298070	124301070
3	124320570	124323570
3	124322070	124325070
3	124340070	124343070
3	124692570	124695570
3	125844570	125847570
3	125846070	125849070
3	125849070	125852070
3	125855070	125858070
3	125858070	125861070
3	125943570	125946570
3	125945070	125948070
3	125946570	125949570
3	125948070	125951070
3	125949570	125952570
3	125951070	125954070
3	125952570	125955570
3	126020070	126023070
3	126393520	126396520
3	127629520	127632520
3	129062020	129065020
3	129063520	129066520
3	129659189	129662189
3	129660689	129663689
3	129662189	129665189
3	131078189	131081189
3	131079689	131082689
3	131267189	131270189
3	131268689	131271689
3	131384189	131387189
3	131595689	131598689
3	131597189	131600189
3	131645189	131648189
3	131646689	131649689
3	131675189	131678189
3	131724689	131727689
3	131726189	131729189
3	132557660	132560660
3	133778660	133781660
3	134152160	134155160
3	134153660	134156660
3	140907586	140910586
3	140909086	140912086
3	143735002	143738002
3	144614037	144617037
3	145233537	145236537
3	145238037	145241037
3	145698537	145701537
3	145700037	145703037
3	145739037	145742037
3	145740537	145743537
3	145742037	145745037
3	145743537	145746537
3	145745037	145748037
3	145979037	145982037
3	145982037	145985037
3	145983537	145986537
3	146255037	146258037
3	146256537	146259537
3	146258037	146261037
3	147827172	147830172
3	148005672	148008672
3	148616172	148619172
3	148619172	148622172
3	148620672	148623672
3	148622172	148625172
3	149388672	149391672
3	149390172	149393172
3	149397672	149400672
3	149880672	149883672
3	151481034	151484034
3	151925034	151928034
3	151926534	151929534
3	151928034	151931034
3	152240034	152243034
3	153042534	153045534
3	153044034	153047034
3	153729623	153732623
3	153735623	153738623
3	154274123	154277123
3	154275623	154278623
3	154277123	154280123
3	158096014	158099014
3	161778699	161781699
3	161810199	161813199
3	161811699	161814699
3	161813199	161816199
3	161814699	161817699
3	162236492	162239492
3	162603992	162606992
3	162635492	162638492
3	162636992	162639992
3	162641492	162644492
3	162723992	162726992
3	162728492	162731492
3	162729992	162732992
3	162731492	162734492
3	164091992	164094992
3	164093492	164096492
3	164115992	164118992
3	164117492	164120492
3	164120492	164123492
3	164127992	164130992
3	164129492	164132492
3	164144492	164147492
3	164180492	164183492
3	164181992	164184992
3	164183492	164186492
3	165456576	165459576
3	165458076	165461076
3	165842076	165845076
3	165843576	165846576
3	165845076	165848076
3	165846576	165849576
3	165849576	165852576
3	165851076	165854076
3	165852576	165855576
3	165854076	165857076
3	165855576	165858576
3	165857076	165860076
3	165966576	165969576
3	165968076	165971076
3	166037076	166040076
3	166044576	166047576
3	169722931	169725931
3	170384431	170387431
3	170385931	170388931
3	171440038	171443038
3	171801538	171804538
3	172623538	172626538
3	172658038	172661038
3	172659538	172662538
3	172661038	172664038
3	172662538	172665538
3	172664038	172667038
3	172665538	172668538
3	173868538	173871538
3	174356116	174359116
3	174771616	174774616
3	175215616	175218616
3	176181616	176184616
3	176505616	176508616
3	176513116	176516116
3	176514616	176517616
3	176520616	176523616
3	176597116	176600116
3	176598616	176601616
3	176607616	176610616
3	177296042	177299042
3	177297542	177300542
3	177299042	177302042
3	178982042	178985042
3	180452070	180455070
3	182451570	182454570
3	183050070	183053070
3	183179306	183182306
3	183180806	183183806
3	183312806	183315806
3	183336806	183339806
3	183377306	183380306
3	183378806	183381806
3	184125806	184128806
3	184406306	184409306
3	184766306	184769306
3	184767806	184770806
3	184833806	184836806
3	186434163	186437163
3	186435663	186438663
3	186437163	186440163
3	186438663	186441663
3	186440163	186443163
3	186777663	186780663
3	186779163	186782163
3	189246505	189249505
3	189854005	189857005
3	189873505	189876505
3	189948505	189951505
3	190053505	190056505
3	190055005	190058005
3	190056505	190059505
3	190058005	190061005
3	190059505	190062505
3	190511005	190514005
3	190512505	190515505
3	190514005	190517005
3	190515505	190518505
3	190517005	190520005
3	190568005	190571005
3	190890505	190893505
3	190892005	190895005
3	190919005	190922005
3	191360005	191363005
3	191361505	191364505
3	191366005	191369005
3	191367505	191370505
3	191429005	191432005
3	191430505	191433505
3	191432005	191435005
3	192449112	192452112
3	192450612	192453612
3	192735612	192738612
3	192822612	192825612
3	192876612	192879612
3	193944612	193947612
3	193946112	193949112
3	194265612	194268612
3	194318112	194321112
3	194667612	194670612
3	194669112	194672112
3	194670612	194673612
3	197144109	197147109
4	534928	537928
4	536428	539428
4	782428	785428
4	1293928	1296928
4	1415428	1418428
4	2175928	2178928
4	2177428	2180428
4	2178928	2181928
4	2183428	2186428
4	2184928	2187928
4	2186428	2189428
4	2187928	2190928
4	2192428	2195428
4	2193928	2196928
4	3793634	3796634
4	3795134	3798134
4	3796634	3799634
4	3798134	3801134
4	3799634	3802634
4	3801134	3804134
4	4284134	4287134
4	4348634	4351634
4	4551134	4554134
4	4687634	4690634
4	4849634	4852634
4	5310134	5313134
4	5311634	5314634
4	5313134	5316134
4	5314634	5317634
4	5316134	5319134
4	5425634	5428634
4	5616134	5619134
4	5965634	5968634
4	5991134	5994134
4	5992634	5995634
4	6414081	6417081
4	7317081	7320081
4	7498581	7501581
4	8329581	8332581
4	9951518	9954518
4	9953018	9956018
4	9956018	9959018
4	9957518	9960518
4	9963518	9966518
4	11634518	11637518
4	11948018	11951018
4	12085548	12088548
4	12090048	12093048
4	12546048	12549048
4	12547548	12550548
4	12585048	12588048
4	12918048	12921048
4	12919548	12922548
4	16417590	16420590
4	17307090	17310090
4	18748720	18751720
4	18750220	18753220
4	20131720	20134720
4	21114144	21117144
4	21729144	21732144
4	22335144	22338144
4	23280144	23283144
4	25000621	25003621
4	25077121	25080121
4	25078621	25081621
4	25629121	25632121
4	28917106	28920106
4	28918606	28921606
4	28954606	28957606
4	28956106	28959106
4	28981606	28984606
4	31336994	31339994
4	31437494	31440494
4	31438994	31441994
4	31588994	31591994
4	31590494	31593494
4	31591994	31594994
4	32251994	32254994
4	32254994	32257994
4	32574494	32577494
4	32575994	32578994
4	32577494	32580494
4	32643494	32646494
4	32644994	32647994
4	32647994	32650994
4	32656994	32659994
4	32989994	32992994
4	32991494	32994494
4	32992994	32995994
4	33727619	33730619
4	33730619	33733619
4	34348619	34351619
4	34506119	34509119
4	34752119	34755119
4	34755119	34758119
4	35512619	35515619
4	35514119	35517119
4	35515619	35518619
4	35517119	35520119
4	35518619	35521619
4	35551619	35554619
4	35605619	35608619
4	35607119	35610119
4	35608619	35611619
4	35610119	35613119
4	35695619	35698619
4	36444039	36447039
4	36622539	36625539
4	36624039	36627039
4	36625539	36628539
4	36627039	36630039
4	36628539	36631539
4	36630039	36633039
4	36867039	36870039
4	36906039	36909039
4	37044039	37047039
4	37050039	37053039
4	37516539	37519539
4	37518039	37521039
4	37522539	37525539
4	37524039	37527039
4	37525539	37528539
4	37561539	37564539
4	37563039	37566039
4	37800039	37803039
4	37801539	37804539
4	38187039	38190039
4	38194539	38197539
4	38196039	38199039
4	38197539	38200539
4	38212539	38215539
4	38784039	38787039
4	38785539	38788539
4	38875539	38878539
4	38877039	38880039
4	38878539	38881539
4	38925039	38928039
4	38991039	38994039
4	39108044	39111044
4	39109544	39112544
4	39117044	39120044
4	41200544	41203544
4	41322044	41325044
4	41592044	41595044
4	41593544	41596544
4	42178963	42181963
4	42181963	42184963
4	42183463	42186463
4	42673963	42676963
4	42675463	42678463
4	42679963	42682963
4	42738463	42741463
4	42739963	42742963
4	42741463	42744463
4	42748963	42751963
4	43204963	43207963
4	43956463	43959463
4	44661463	44664463
4	44662963	44665963
4	44868463	44871463
4	48174046	48177046
4	48258046	48261046
4	53353941	53356941
4	53359941	53362941
4	53361441	53364441
4	54472649	54475649
4	54475649	54478649
4	56025149	56028149
4	56026649	56029649
4	56035649	56038649
4	56037149	56040149
4	56142149	56145149
4	56143649	56146649
4	56145149	56148149
4	56146649	56149649
4	56149649	56152649
4	56151149	56154149
4	56152649	56155649
4	56163149	56166149
4	57091631	57094631
4	57123131	57126131
4	57124631	57127631
4	57127631	57130631
4	57129131	57132131
4	57685631	57688631
4	57697631	57700631
4	57916631	57919631
4	57918131	57921131
4	57919631	57922631
4	57921131	57924131
4	57940631	57943631
4	57942131	57945131
4	57951131	57954131
4	58159631	58162631
4	58161131	58164131
4	58167131	58170131
4	58168631	58171631
4	58567631	58570631
4	58569131	58572131
4	58570631	58573631
4	58572131	58575131
4	58719131	58722131
4	58720631	58723631
4	58957631	58960631
4	58959131	58962131
4	58960631	58963631
4	58977131	58980131
4	59355131	59358131
4	59356631	59359631
4	59607131	59610131
4	59608631	59611631
4	59610131	59613131
4	59613131	59616131
4	59628131	59631131
4	59629631	59632631
4	59668631	59671631
4	59808131	59811131
4	59809631	59812631
4	59811131	59814131
4	59812631	59815631
4	60055656	60058656
4	60057156	60060156
4	61282656	61285656
4	61284156	61287156
4	61309656	61312656
4	62614656	62617656
4	62616156	62619156
4	63648059	63651059
4	63651059	63654059
4	63652559	63655559
4	63654059	63657059
4	63678059	63681059
4	63679559	63682559
4	64534559	64537559
4	64536059	64539059
4	65223059	65226059
4	65263559	65266559
4	65265059	65268059
4	65538059	65541059
4	65817059	65820059
4	65818559	65821559
4	66718575	66721575
4	66751575	66754575
4	66993075	66996075
4	66994575	66997575
4	67300575	67303575
4	67753575	67756575
4	68914575	68917575
4	68916075	68919075
4	69347015	69350015
4	69348515	69351515
4	69350015	69353015
4	69383015	69386015
4	69390515	69393515
4	69593015	69596015
4	69594515	69597515
4	69608015	69611015
4	69609515	69612515
4	70388015	70391015
4	70389515	70392515
4	70392515	70395515
4	70394015	70397015
4	70395515	70398515
4	70412015	70415015
4	70413515	70416515
4	70415015	70418015
4	70418015	70421015
4	70422515	70425515
4	70427015	70430015
4	70428515	70431515
4	70488515	70491515
4	71208515	71211515
4	71210015	71213015
4	71211515	71214515
4	71213015	71216015
4	71214515	71217515
4	71250515	71253515
4	71366015	71369015
4	71381015	71384015
4	71385515	71388515
4	71588015	71591015
4	72873402	72876402
4	72907902	72910902
4	73419402	73422402
4	73444902	73447902
4	73446402	73449402
4	73447902	73450902
4	73449402	73452402
4	73491402	73494402
4	73494402	73497402
4	73627902	73630902
4	73629402	73632402
4	73630902	73633902
4	73671402	73674402
4	74448402	74451402
4	74449902	74452902
4	74451402	74454402
4	75199613	75202613
4	75201113	75204113
4	75207113	75210113
4	75421613	75424613
4	75769613	75772613
4	76192613	76195613
4	76194113	76197113
4	76302113	76305113
4	76303613	76306613
4	76951613	76954613
4	76953113	76956113
4	76954613	76957613
4	76960613	76963613
4	76962113	76965113
4	76969613	76972613
4	76971113	76974113
4	76972613	76975613
4	77022113	77025113
4	77028113	77031113
4	77029613	77032613
4	77073113	77076113
4	77452613	77455613
4	77454113	77457113
4	77724113	77727113
4	78099199	78102199
4	78100699	78103699
4	78205699	78208699
4	78226699	78229699
4	78228199	78231199
4	78232699	78235699
4	78234199	78237199
4	78244699	78247699
4	78249199	78252199
4	78258199	78261199
4	78262699	78265699
4	78264199	78267199
4	78289699	78292699
4	78291199	78294199
4	78303199	78306199
4	78988699	78991699
4	79260199	79263199
4	79285699	79288699
4	79420699	79423699
4	79452199	79455199
4	79453699	79456699
4	80808199	80811199
4	82474615	82477615
4	82549615	82552615
4	82551115	82554115
4	83553115	83556115
4	83554615	83557615
4	83659615	83662615
4	83661115	83664115
4	84157583	84160583
4	84159083	84162083
4	84160583	84163583
4	84171083	84174083
4	84526583	84529583
4	84528083	84531083
4	84792083	84795083
4	84826583	84829583
4	84943583	84946583
4	84945083	84948083
4	85024583	85027583
4	86037083	86040083
4	86460083	86463083
4	86472083	86475083
4	86473583	86476583
4	86475083	86478083
4	86478083	86481083
4	86479583	86482583
4	86571083	86574083
4	86572583	86575583
4	88669825	88672825
4	88671325	88674325
4	89739325	89742325
4	90163593	90166593
4	90165093	90168093
4	90166593	90169593
4	90591093	90594093
4	91714593	91717593
4	91719093	91722093
4	92278593	92281593
4	92280093	92283093
4	93504078	93507078
4	94215078	94218078
4	94216578	94219578
4	94801578	94804578
4	94803078	94806078
4	94804578	94807578
4	96700679	96703679
4	96702179	96705179
4	96745679	96748679
4	97423679	97426679
4	97425179	97428179
4	97426679	97429679
4	97428179	97431179
4	97431179	97434179
4	97432679	97435679
4	97434179	97437179
4	99015143	99018143
4	99019643	99022643
4	99027143	99030143
4	99037643	99040643
4	99039143	99042143
4	99043643	99046643
4	99048143	99051143
4	99054143	99057143
4	99055643	99058643
4	99465143	99468143
4	99661643	99664643
4	100291643	100294643
4	100293143	100296143
4	100294643	100297643
4	100299143	100302143
4	101106143	101109143
4	101124143	101127143
4	101446643	101449643
4	101479643	101482643
4	101505143	101508143
4	101506643	101509643
4	101850143	101853143
4	102324143	102327143
4	103551143	103554143
4	103552643	103555643
4	103554143	103557143
4	103555643	103558643
4	103594643	103597643
4	104464643	104467643
4	104469143	104472143
4	110029656	110032656
4	110134656	110137656
4	110151156	110154156
4	110152656	110155656
4	111126166	111129166
4	112762666	112765666
4	114019573	114022573
4	114795073	114798073
4	115012573	115015573
4	115143073	115146073
4	115144573	115147573
4	115146073	115149073
4	115147573	115150573
4	115411573	115414573
4	115413073	115416073
4	115414573	115417573
[truncated: 5,420 more rows]

## Sheet: SIGNIF_tf0.4_GBR
1	1908088	1911088
1	1909588	1912588
1	4392120	4395120
1	4393620	4396620
1	4596120	4599120
1	4597620	4600620
1	4599120	4602120
1	4600620	4603620
1	9331702	9334702
1	9333202	9336202
1	14370088	14373088
1	14371588	14374588
1	14437588	14440588
1	14439088	14442088
1	14455588	14458588
1	14457088	14460088
1	14458588	14461588
1	14460088	14463088
1	14461588	14464588
1	15364588	15367588
1	15510088	15513088
1	15514588	15517588
1	15574588	15577588
1	15576088	15579088
1	15843105	15846105
1	15910605	15913605
1	16380105	16383105
1	17400105	17403105
1	17401605	17404605
1	17628105	17631105
1	17649105	17652105
1	17716605	17719605
1	17718105	17721105
1	17719605	17722605
1	18804105	18807105
1	19173124	19176124
1	19174624	19177624
1	20095624	20098624
1	22359108	22362108
1	22360608	22363608
1	24196608	24199608
1	24198108	24201108
1	24199608	24202608
1	24201108	24204108
1	24202608	24205608
1	24207108	24210108
1	24531108	24534108
1	25185282	25188282
1	25186782	25189782
1	26167782	26170782
1	31062085	31065085
1	31063585	31066585
1	31075585	31078585
1	34038416	34041416
1	35262416	35265416
1	35301416	35304416
1	35302916	35305916
1	36862837	36865837
1	39211837	39214837
1	40153593	40156593
1	40155093	40158093
1	41758593	41761593
1	42091593	42094593
1	44563663	44566663
1	44565163	44568163
1	46809771	46812771
1	46811271	46814271
1	46812771	46815771
1	46814271	46817271
1	46815771	46818771
1	46817271	46820271
1	46823271	46826271
1	46826271	46829271
1	49132941	49135941
1	49134441	49137441
1	54156261	54159261
1	55516612	55519612
1	56154112	56157112
1	56809612	56812612
1	57067612	57070612
1	57069112	57072112
1	57070612	57073612
1	57663112	57666112
1	59464753	59467753
1	59466253	59469253
1	59467753	59470753
1	59469253	59472253
1	62125791	62128791
1	62686791	62689791
1	62688291	62691291
1	62760291	62763291
1	63412791	63415791
1	64842435	64845435
1	64843935	64846935
1	66126435	66129435
1	66127935	66130935
1	66129435	66132435
1	66130935	66133935
1	66132435	66135435
1	66133935	66136935
1	66159435	66162435
1	66160935	66163935
1	66165435	66168435
1	66847588	66850588
1	66957088	66960088
1	66958588	66961588
1	67800088	67803088
1	69067588	69070588
1	70975095	70978095
1	71486595	71489595
1	72770595	72773595
1	73554108	73557108
1	73638108	73641108
1	73851108	73854108
1	73857108	73860108
1	73986108	73989108
1	77104933	77107933
1	77106433	77109433
1	77107933	77110933
1	77109433	77112433
1	77110933	77113933
1	77112433	77115433
1	79171601	79174601
1	80512601	80515601
1	80808101	80811101
1	80809601	80812601
1	81400601	81403601
1	81402101	81405101
1	83107670	83110670
1	83142170	83145170
1	83143670	83146670
1	83145170	83148170
1	83161670	83164670
1	83164670	83167670
1	83166170	83169170
1	83238170	83241170
1	84219170	84222170
1	86457087	86460087
1	86458587	86461587
1	86895087	86898087
1	87612087	87615087
1	87613587	87616587
1	88512150	88515150
1	88513650	88516650
1	89994150	89997150
1	91642643	91645643
1	91644143	91647143
1	93522143	93525143
1	94440150	94443150
1	94444650	94447650
1	95133150	95136150
1	95146650	95149650
1	95148150	95151150
1	95149650	95152650
1	95155650	95158650
1	95163150	95166150
1	95164650	95167650
1	99196709	99199709
1	102376583	102379583
1	102378083	102381083
1	102436583	102439583
1	102814583	102817583
1	104787085	104790085
1	105112585	105115585
1	105250585	105253585
1	105252085	105255085
1	105498085	105501085
1	105507085	105510085
1	105649585	105652585
1	106046568	106049568
1	106126068	106129068
1	106127568	106130568
1	106129068	106132068
1	108244068	108247068
1	108562068	108565068
1	108565068	108568068
1	108566568	108569568
1	108695568	108698568
1	109362025	109365025
1	109366525	109369525
1	109368025	109371025
1	111405025	111408025
1	111574525	111577525
1	111580525	111583525
1	111582025	111585025
1	111585025	111588025
1	111828025	111831025
1	111829525	111832525
1	112648806	112651806
1	112650306	112653306
1	112651806	112654806
1	115720603	115723603
1	117873092	117876092
1	118347092	118350092
1	118350092	118353092
1	118356092	118359092
1	119083592	119086592
1	119557592	119560592
1	120084092	120087092
1	120085592	120088592
1	120087092	120090092
1	120162092	120165092
1	120331592	120334592
1	120333092	120336092
1	120334592	120337592
1	120336092	120339092
1	146761809	146764809
1	146767809	146770809
1	152413710	152416710
1	152607210	152610210
1	152689710	152692710
1	152691210	152694210
1	152692710	152695710
1	152694210	152697210
1	152964210	152967210
1	152971710	152974710
1	152973210	152976210
1	152974710	152977710
1	152980710	152983710
1	152982210	152985210
1	152983710	152986710
1	153001710	153004710
1	153003210	153006210
1	153006210	153009210
1	153132210	153135210
1	153133710	153136710
1	157129769	157132769
1	157131269	157134269
1	157195769	157198769
1	157203269	157206269
1	157204769	157207769
1	157593269	157596269
1	157594769	157597769
1	157596269	157599269
1	157597769	157600769
1	158406269	158409269
1	158490269	158493269
1	158491769	158494769
1	158494769	158497769
1	158496269	158499269
1	158497769	158500769
1	158503769	158506769
1	158505269	158508269
1	158706269	158709269
1	158713769	158716769
1	158733269	158736269
1	158839769	158842769
1	158841269	158844269
1	159460769	159463769
1	160348591	160351591
1	160932091	160935091
1	162028591	162031591
1	162106591	162109591
1	164082091	164085091
1	165895617	165898617
1	166443117	166446117
1	166731117	166734117
1	167124117	167127117
1	167524617	167527617
1	167580117	167583117
1	169369593	169372593
1	169531593	169534593
1	169533093	169536093
1	170832093	170835093
1	171117093	171120093
1	171799593	171802593
1	171801093	171804093
1	172449091	172452091
1	172465591	172468591
1	172602091	172605091
1	175054672	175057672
1	175057672	175060672
1	175059172	175062172
1	179272820	179275820
1	179407820	179410820
1	179409320	179412320
1	179437820	179440820
1	179439320	179442320
1	179440820	179443820
1	179443820	179446820
1	179446820	179449820
1	179449820	179452820
1	179451320	179454320
1	179452820	179455820
1	179454320	179457320
1	179458820	179461820
1	179683820	179686820
1	179686820	179689820
1	181396632	181399632
1	181824132	181827132
1	182260632	182263632
1	182262132	182265132
1	182508132	182511132
1	183073632	183076632
1	183085632	183088632
1	183093132	183096132
1	183094632	183097632
1	183096132	183099132
1	183112632	183115632
1	183154632	183157632
1	183156132	183159132
1	183159132	183162132
1	183160632	183163632
1	183264132	183267132
1	183295632	183298632
1	183297132	183300132
1	183579132	183582132
1	183580632	183583632
1	183666132	183669132
1	183667632	183670632
1	183669132	183672132
1	183801132	183804132
1	185524776	185527776
1	185526276	185529276
1	185527776	185530776
1	185565276	185568276
1	185566776	185569776
1	185568276	185571276
1	185665776	185668776
1	187752116	187755116
1	188229116	188232116
1	188230616	188233616
1	188233616	188236616
1	188241116	188244116
1	188244116	188247116
1	188245616	188248616
1	188247116	188250116
1	188320616	188323616
1	188322116	188325116
1	188323616	188326616
1	188325116	188328116
1	188326616	188329616
1	188434616	188437616
1	188445116	188448116
1	188766116	188769116
1	188767616	188770616
1	189616616	189619616
1	189619616	189622616
1	189621116	189624116
1	189643616	189646616
1	189990112	189993112
1	189991612	189994612
1	189999112	190002112
1	190002112	190005112
1	190003612	190006612
1	192579112	192582112
1	192580612	192583612
1	194385229	194388229
1	194386729	194389729
1	194389729	194392729
1	195042229	195045229
1	195043729	195046729
1	195049729	195052729
1	195057229	195060229
1	195058729	195061729
1	195081229	195084229
1	195082729	195085729
1	195084229	195087229
1	195085729	195088729
1	195087229	195090229
1	195088729	195091729
1	195090229	195093229
1	195091729	195094729
1	195093229	195096229
1	195094729	195097729
1	195801229	195804229
1	195802729	195805729
1	195804229	195807229
1	195805729	195808729
1	195819229	195822229
1	195820729	195823729
1	195822229	195825229
1	195823729	195826729
1	195825229	195828229
1	195826729	195829729
1	195834107	195837107
1	195835607	195838607
1	195913607	195916607
1	195915107	195918107
1	199356126	199359126
1	200328126	200331126
1	200692626	200695626
1	201216126	201219126
1	201217626	201220626
1	201472626	201475626
1	201474126	201477126
1	201943622	201946622
1	201945122	201948122
1	201952622	201955622
1	204285122	204288122
1	205302145	205305145
1	205303645	205306645
1	205374145	205377145
1	205507645	205510645
1	208127306	208130306
1	208128806	208131806
1	208130306	208133306
1	210539306	210542306
1	210695306	210698306
1	210696806	210699806
1	215188597	215191597
1	215413597	215416597
1	215860597	215863597
1	218856167	218859167
1	219625667	219628667
1	219627167	219630167
1	219786167	219789167
1	219957340	219960340
1	219960340	219963340
1	220143340	220146340
1	221470840	221473840
1	221472340	221475340
1	226636604	226639604
1	227380604	227383604
1	227388104	227391104
1	227389604	227392604
1	227469104	227472104
1	227479604	227482604
1	227499104	227502104
1	228964673	228967673
1	229836173	229839173
1	230236673	230239673
1	230502173	230505173
1	230503673	230506673
1	230505173	230508173
1	230899673	230902673
1	231204173	231207173
1	232137088	232140088
1	232320088	232323088
1	233518588	233521588
1	233520088	233523088
1	233521588	233524588
1	233523088	233526088
1	233524588	233527588
1	233938588	233941588
1	234124588	234127588
1	234126088	234129088
1	234585088	234588088
1	234631588	234634588
1	235800132	235803132
1	236382132	236385132
1	236383632	236386632
1	236385132	236388132
1	236476632	236479632
1	236478132	236481132
1	236512632	236515632
1	236518632	236521632
1	236520132	236523132
1	236526132	236529132
1	236527632	236530632
1	236587632	236590632
1	236589132	236592132
1	236590632	236593632
1	236700132	236703132
1	236713632	236716632
1	236746632	236749632
1	237613632	237616632
1	237615132	237618132
1	237684132	237687132
1	237736632	237739632
1	237739632	237742632
1	238414627	238417627
1	238416127	238419127
1	238471627	238474627
1	238474627	238477627
1	238627627	238630627
1	238629127	238632127
1	238636627	238639627
1	238852627	238855627
1	238854127	238857127
1	239047627	239050627
1	240174127	240177127
1	240177127	240180127
1	240178627	240181627
1	240216127	240219127
1	240217627	240220627
1	240219127	240222127
1	240220627	240223627
1	240601627	240604627
1	241890156	241893156
1	241897656	241900656
1	244516860	244519860
1	244518360	244521360
1	245572860	245575860
1	246430860	246433860
1	246432360	246435360
1	246709860	246712860
1	246712860	246715860
1	247348756	247351756
1	247623256	247626256
1	247624756	247627756
1	247813756	247816756
1	247815256	247818256
1	248473756	248476756
1	248512756	248515756
1	248514256	248517256
1	248575756	248578756
2	613056	616056
2	616056	619056
2	617556	620556
2	622056	625056
2	629556	632556
2	772056	775056
2	850056	853056
2	857556	860556
2	859056	862056
2	860556	863556
2	974556	977556
2	1115556	1118556
2	1117056	1120056
2	1138056	1141056
2	1139556	1142556
2	1141056	1144056
2	1201056	1204056
2	1360056	1363056
2	1363056	1366056
2	1364556	1367556
2	1367556	1370556
2	1618056	1621056
2	2605056	2608056
2	2606556	2609556
2	2608056	2611056
2	4859526	4862526
2	6332600	6335600
2	7630100	7633100
2	7631600	7634600
2	8440100	8443100
2	10669077	10672077
2	10670577	10673577
2	10754577	10757577
2	11558577	11561577
2	11560077	11563077
2	11561577	11564577
2	12035527	12038527
2	12310027	12313027
2	12950527	12953527
2	15040065	15043065
2	15163065	15166065
2	15164565	15167565
2	15205065	15208065
2	15206565	15209565
2	17218065	17221065
2	17450565	17453565
2	18007065	18010065
2	18262129	18265129
2	18263629	18266629
2	18265129	18268129
2	18277129	18280129
2	18592129	18595129
2	18608629	18611629
2	18679129	18682129
2	18709129	18712129
2	19693129	19696129
2	19792129	19795129
2	19877629	19880629
2	25126318	25129318
2	25127818	25130818
2	25129318	25132318
2	28360950	28363950
2	29173950	29176950
2	29175450	29178450
2	29701950	29704950
2	30478130	30481130
2	30605630	30608630
2	31270130	31273130
2	31271630	31274630
2	31397630	31400630
2	33404603	33407603
2	33964103	33967103
2	33965603	33968603
2	33967103	33970103
2	34139603	34142603
2	34184603	34187603
2	34586603	34589603
2	35869103	35872103
2	35872103	35875103
2	35873603	35876603
2	35875103	35878103
2	35876603	35879603
2	35878103	35881103
2	35879603	35882603
2	35881103	35884103
2	35882603	35885603
2	35884103	35887103
2	35885603	35888603
2	35887103	35890103
2	35890103	35893103
2	35932103	35935103
2	35933603	35936603
2	35935103	35938103
2	35936603	35939603
2	36131529	36134529
2	37381029	37384029
2	37382529	37385529
2	38054529	38057529
2	38056029	38059029
2	38057529	38060529
2	38059029	38062029
2	40610804	40613804
2	41842304	41845304
2	41962304	41965304
2	41963804	41966804
2	41965304	41968304
2	42335524	42338524
2	43013524	43016524
2	43016524	43019524
2	43342024	43345024
2	43345024	43348024
2	43882024	43885024
2	43928524	43931524
2	45209539	45212539
2	45211039	45214039
2	45968539	45971539
2	46052539	46055539
2	46054039	46057039
2	46055539	46058539
2	46327039	46330039
2	46487539	46490539
2	48937028	48940028
2	50216528	50219528
2	50224028	50227028
2	50225528	50228528
2	50227028	50230028
2	51526023	51529023
2	52912023	52915023
2	52931523	52934523
2	54806527	54809527
2	57397096	57400096
2	57440596	57443596
2	57464596	57467596
2	57479596	57482596
2	57481096	57484096
2	63553132	63556132
2	63554632	63557632
2	65131132	65134132
2	65783632	65786632
2	66211008	66214008
2	68029008	68032008
2	68171508	68174508
2	68173008	68176008
2	68569008	68572008
2	68597508	68600508
2	68599008	68602008
2	68600508	68603508
2	68620008	68623008
2	68902008	68905008
2	70862524	70865524
2	70864024	70867024
2	70943524	70946524
2	71048524	71051524
2	71050024	71053024
2	71051524	71054524
2	71053024	71056024
2	75038953	75041953
2	75476953	75479953
2	75650953	75653953
2	76250953	76253953
2	76349953	76352953
2	76358953	76361953
2	76360453	76363453
2	76363453	76366453
2	76364953	76367953
2	76366453	76369453
2	76370953	76373953
2	76741453	76744453
2	76742953	76745953
2	76744453	76747453
2	77219953	77222953
2	77221453	77224453
2	79225061	79228061
2	79226561	79229561
2	79228061	79231061
2	79283561	79286561
2	79889561	79892561
2	82022537	82025537
2	82027037	82030037
2	82028537	82031537
2	82033037	82036037
2	82034537	82037537
2	82039037	82042037
2	82186037	82189037
2	82379537	82382537
2	82387037	82390037
2	82388537	82391537
2	83395037	83398037
2	84055136	84058136
2	85924136	85927136
2	85925636	85928636
2	85927136	85930136
2	98981537	98984537
2	101060511	101063511
2	101077011	101080011
2	101078511	101081511
2	101083011	101086011
2	101084511	101087511
2	101245011	101248011
2	101246511	101249511
2	102077575	102080575
2	102178075	102181075
2	102838075	102841075
2	102965575	102968575
2	102967075	102970075
2	105401508	105404508
2	106129008	106132008
2	106141008	106144008
2	106144008	106147008
2	106382508	106385508
2	106384008	106387008
2	106624008	106627008
2	107677008	107680008
2	108071594	108074594
2	108700094	108703094
2	109931594	109934594
2	113815921	113818921
2	113817421	113820421
2	113820421	113823421
2	113821921	113824921
2	114155548	114158548
2	116900548	116903548
2	116902048	116905048
2	116903548	116906548
2	116909548	116912548
2	117587545	117590545
2	121798074	121801074
2	121799574	121802574
2	123842512	123845512
2	124928512	124931512
2	125417512	125420512
2	125462512	125465512
2	125464012	125467012
2	125465512	125468512
2	125467012	125470012
2	125468512	125471512
2	126388009	126391009
2	127528009	127531009
2	127546009	127549009
2	129151029	129154029
2	129158529	129161529
2	130405029	130408029
2	130406529	130409529
2	133158093	133161093
2	133188093	133191093
2	133644093	133647093
2	135406018	135409018
2	137962018	137965018
2	137963518	137966518
2	137965018	137968018
2	137966518	137969518
2	137968018	137971018
2	137969518	137972518
2	137972518	137975518
2	137978518	137981518
2	137980018	137983018
2	140164271	140167271
2	140165771	140168771
2	141865019	141868019
2	142007519	142010519
2	142091519	142094519
2	142096019	142099019
2	142097519	142100519
2	142229519	142232519
2	142231019	142234019
2	142232519	142235519
2	143570519	143573519
2	149915536	149918536
2	150001036	150004036
2	150002536	150005536
2	150005536	150008536
2	150604065	150607065
2	150605565	150608565
2	150611565	150614565
2	150613065	150616065
2	150617565	150620565
2	150619065	150622065
2	150620565	150623565
2	150622065	150625065
2	150623565	150626565
2	151814565	151817565
2	151816065	151819065
2	151825065	151828065
2	155255642	155258642
2	155615642	155618642
2	155617142	155620142
2	160583639	160586639
2	160600139	160603139
2	165034047	165037047
2	165043047	165046047
2	166895547	166898547
2	166904547	166907547
2	166906047	166909047
2	166909047	166912047
2	166915047	166918047
2	166916547	166919547
2	166918047	166921047
2	166997547	167000547
2	166999047	167002047
2	167000547	167003547
2	167165547	167168547
2	167450547	167453547
2	169029637	169032637
2	170525137	170528137
2	170631637	170634637
2	170633137	170636137
2	170636137	170639137
2	171148294	171151294
2	171581794	171584794
2	172373794	172376794
2	175564001	175567001
2	175597001	175600001
2	176623001	176626001
2	176674001	176677001
2	181865533	181868533
2	182992033	182995033
2	182993533	182996533
2	186314553	186317553
2	186994053	186997053
2	191224017	191227017
2	191225517	191228517
2	192163067	192166067
2	192164567	192167567
2	192166067	192169067
2	193730567	193733567
2	193733567	193736567
2	194365067	194368067
2	194366567	194369567
2	194371067	194374067
2	205118586	205121586
2	206038086	206041086
2	207581504	207584504
2	208966004	208969004
2	208973504	208976504
2	210116636	210119636
2	210118136	210121136
2	210256136	210259136
2	211852136	211855136
2	211853636	211856636
2	211855136	211858136
2	211856636	211859636
2	211858136	211861136
2	211859636	211862636
2	213076077	213079077
2	214717077	214720077
2	214718577	214721577
2	214720077	214723077
2	214721577	214724577
2	214724577	214727577
2	214726077	214729077
2	214735077	214738077
2	214736577	214739577
2	214759077	214762077
2	215630577	215633577
2	216418097	216421097
2	216577097	216580097
2	217267097	217270097
2	218707097	218710097
2	218708597	218711597
2	218710097	218713097
2	218711597	218714597
2	220573036	220576036
2	220579036	220582036
2	220834036	220837036
2	220835536	220838536
2	220840036	220843036
2	220963036	220966036
2	222217115	222220115
2	222218615	222221615
2	222976115	222979115
2	226022531	226025531
2	226024031	226027031
2	226025531	226028531
2	226028531	226031531
2	226033031	226036031
2	226034531	226037531
2	226036031	226039031
2	226048031	226051031
2	226049531	226052531
2	226051031	226054031
2	226052531	226055531
2	227921531	227924531
2	228091128	228094128
2	228092628	228095628
2	228466128	228469128
2	228467628	228470628
2	229909128	229912128
2	230960628	230963628
2	230996628	230999628
2	231242596	231245596
2	231244096	231247096
2	231256096	231259096
2	231257596	231260596
2	231329596	231332596
2	231331096	231334096
2	231332596	231335596
2	231421096	231424096
2	231427096	231430096
2	231428596	231431596
2	231430096	231433096
2	231437596	231440596
2	231878596	231881596
2	232388596	232391596
2	233960596	233963596
2	234059233	234062233
2	234060733	234063733
2	234066733	234069733
2	234588733	234591733
2	234593233	234596233
2	234594733	234597733
2	234596233	234599233
2	235509733	235512733
2	236672233	236675233
2	237763278	237766278
2	238211778	238214778
2	238535778	238538778
2	239006778	239009778
2	239488278	239491278
2	241018012	241021012
2	241019512	241022512
2	241118512	241121512
2	241340512	241343512
2	241829512	241832512
2	241832512	241835512
2	241840012	241843012
3	296178	299178
3	890178	893178
3	1514178	1517178
3	1848678	1851678
3	1850178	1853178
3	1901178	1904178
3	1902678	1905678
3	1907178	1910178
3	1908678	1911678
3	1932678	1935678
3	2954178	2957178
3	2955678	2958678
3	2960178	2963178
3	3750565	3753565
3	3981565	3984565
3	3983065	3986065
3	3986065	3989065
3	3987565	3990565
3	4013065	4016065
3	4377565	4380565
3	4730065	4733065
3	5714065	5717065
3	5954065	5957065
3	5955565	5958565
3	7128513	7131513
3	7130013	7133013
3	7365513	7368513
3	7370013	7373013
3	7620513	7623513
3	7911513	7914513
3	7916013	7919013
3	7922013	7925013
3	7923513	7926513
3	7925013	7928013
3	7938513	7941513
3	7940013	7943013
3	7982013	7985013
3	7983513	7986513
3	7985013	7988013
3	8177013	8180013
3	8619513	8622513
3	8963013	8966013
3	11034711	11037711
3	11996211	11999211
3	13109008	13112008
3	13110508	13113508
3	13112008	13115008
3	13193008	13196008
3	13467508	13470508
3	13473508	13476508
3	13475008	13478008
3	13476508	13479508
3	13697008	13700008
3	13925008	13928008
3	14289508	14292508
3	14291008	14294008
3	14328508	14331508
3	14570008	14573008
3	16007010	16010010
3	16008510	16011510
3	16182510	16185510
3	16184010	16187010
3	16185510	16188510
3	16367010	16370010
3	18819570	18822570
3	20505570	20508570
3	20507070	20510070
3	20511570	20514570
3	20513070	20516070
3	21485214	21488214
3	21486714	21489714
3	21492714	21495714
3	21743214	21746214
3	21797214	21800214
3	21959214	21962214
3	21960714	21963714
3	22049214	22052214
3	22721214	22724214
3	23973714	23976714
3	23975214	23978214
3	26502543	26505543
3	26504043	26507043
3	26549043	26552043
3	26615043	26618043
3	26616543	26619543
3	26775543	26778543
3	26777043	26780043
3	28149541	28152541
3	28151041	28154041
3	30251036	30254036
3	30903536	30906536
3	31167536	31170536
3	31775036	31778036
3	32205536	32208536
3	32207036	32210036
3	32454536	32457536
3	32661536	32664536
3	32663036	32666036
3	32664536	32667536
3	34712029	34715029
3	34721029	34724029
3	36152053	36155053
3	36153553	36156553
3	36155053	36158053
3	36156553	36159553
3	36212053	36215053
3	36422053	36425053
3	39446011	39449011
3	39447511	39450511
3	39530011	39533011
3	39531511	39534511
3	39953011	39956011
3	39971011	39974011
3	39974011	39977011
3	40094011	40097011
3	40095511	40098511
3	40097011	40100011
3	40103011	40106011
3	40104511	40107511
3	40106011	40109011
3	41049511	41052511
3	41102011	41105011
3	41373511	41376511
3	41525011	41528011
3	41585011	41588011
3	41586511	41589511
3	41597011	41600011
3	41598511	41601511
3	42365087	42368087
3	42366587	42369587
3	42368087	42371087
3	42369587	42372587
3	42371087	42374087
3	42372587	42375587
3	44942087	44945087
3	45221019	45224019
3	54327550	54330550
3	54329050	54332050
3	56760550	56763550
3	58379029	58382029
3	59475529	59478529
3	60102522	60105522
3	60105522	60108522
3	60107022	60110022
3	60108522	60111522
3	60110022	60113022
3	60807522	60810522
3	61047522	61050522
3	61049022	61052022
3	61050522	61053522
3	61052022	61055022
3	62684022	62687022
3	62723022	62726022
3	62724522	62727522
3	63273562	63276562
3	67653562	67656562
3	67655062	67658062
3	67656562	67659562
3	67658062	67661062
3	67659562	67662562
3	69411869	69414869
3	69413369	69416369
3	69414869	69417869
3	69416369	69419369
3	69552869	69555869
3	69843869	69846869
3	69879869	69882869
3	70347869	70350869
3	71843369	71846369
3	72027869	72030869
3	72029369	72032369
3	74064563	74067563
3	74774063	74777063
3	74783063	74786063
3	75599072	75602072
3	75600572	75603572
3	75602072	75605072
3	75603572	75606572
3	75605072	75608072
3	75759572	75762572
3	76119572	76122572
3	76674572	76677572
3	76985072	76988072
3	76986572	76989572
3	77601572	77604572
3	77603072	77606072
3	80450044	80453044
3	82540569	82543569
3	83922069	83925069
3	83923569	83926569
3	84507918	84510918
3	84509418	84512418
3	85574418	85577418
3	85575918	85578918
3	85583418	85586418
3	85584918	85587918
3	85593918	85596918
3	85595418	85598418
3	85596918	85599918
3	85598418	85601418
3	85610418	85613418
3	86525418	86528418
3	86526918	86529918
3	86529918	86532918
3	86750418	86753418
3	86751918	86754918
3	87344059	87347059
3	87345559	87348559
3	87347059	87350059
3	87357559	87360559
3	88536559	88539559
3	88538059	88541059
3	94204955	94207955
3	94206455	94209455
3	95149955	95152955
3	95151455	95154455
3	95154455	95157455
3	95163455	95166455
3	95164955	95167955
3	95167955	95170955
3	95169455	95172455
3	95170955	95173955
3	95172455	95175455
3	95173955	95176955
3	95175455	95178455
3	95178455	95181455
3	95179955	95182955
3	95181455	95184455
3	95182955	95185955
3	96037955	96040955
3	97784065	97787065
3	97788565	97791565
3	97790065	97793065
3	97791565	97794565
3	97793065	97796065
3	97799065	97802065
3	97838065	97841065
3	97839565	97842565
3	97890565	97893565
3	97892065	97895065
3	97899565	97902565
3	97902565	97905565
3	97904065	97907065
3	97905565	97908565
3	97907065	97910065
3	97919065	97922065
3	97920565	97923565
3	97934065	97937065
3	97935565	97938565
3	97937065	97940065
3	97938565	97941565
3	97940065	97943065
3	97941565	97944565
3	97983565	97986565
3	98721565	98724565
3	98724565	98727565
3	98726065	98729065
3	98727565	98730565
3	98733565	98736565
3	98735065	98738065
3	98736565	98739565
3	98738065	98741065
3	98739565	98742565
3	98742565	98745565
3	98744065	98747065
3	98745565	98748565
3	98747065	98750065
3	98751565	98754565
3	98753065	98756065
3	98759065	98762065
3	98760565	98763565
3	100809504	100812504
3	100811004	100814004
3	101976504	101979504
3	101982504	101985504
3	102813665	102816665
3	102815165	102818165
3	102818165	102821165
3	102819665	102822665
3	103451165	103454165
3	103466165	103469165
3	103818665	103821665
3	103937165	103940165
3	103938665	103941665
3	103944665	103947665
3	104237165	104240165
3	104412665	104415665
3	104415665	104418665
3	104417165	104420165
3	104418665	104421665
3	104802665	104805665
3	104804165	104807165
3	105694583	105697583
3	105696083	105699083
3	107701583	107704583
3	108061583	108064583
3	108063083	108066083
3	108064583	108067583
3	108066083	108069083
3	108876609	108879609
3	109647609	109650609
3	109650609	109653609
3	109652109	109655109
3	109653609	109656609
3	109655109	109658109
3	109719609	109722609
3	110994609	110997609
3	110996109	110999109
3	111035109	111038109
3	111038109	111041109
3	111738692	111741692
3	111740192	111743192
3	111741692	111744692
3	111743192	111746192
3	111923192	111926192
3	111927692	111930692
3	111941192	111944192
3	111948692	111951692
3	111956192	111959192
3	111971192	111974192
3	111989192	111992192
3	112500692	112503692
3	112841192	112844192
3	112842692	112845692
3	112844192	112847192
3	115116590	115119590
3	115683590	115686590
3	116319590	116322590
3	120391623	120394623
3	121639623	121642623
3	121641123	121644123
3	121642623	121645623
3	121645623	121648623
3	122301123	122304123
3	123097623	123100623
3	123101070	123104070
3	123102570	123105570
3	123104070	123107070
3	123105570	123108570
3	124298070	124301070
3	124299570	124302570
3	124304070	124307070
3	124305570	124308570
3	124317570	124320570
3	124320570	124323570
3	124340070	124343070
3	124377570	124380570
3	124691070	124694070
3	124692570	124695570
3	125676570	125679570
3	125844570	125847570
3	125846070	125849070
3	125847570	125850570
3	125849070	125852070
3	125856570	125859570
3	125858070	125861070
3	125943570	125946570
3	125945070	125948070
3	125946570	125949570
3	125948070	125951070
3	125949570	125952570
3	125951070	125954070
3	125952570	125955570
3	126020070	126023070
3	129062020	129065020
3	129063520	129066520
3	131384189	131387189
3	131385689	131388689
3	131594189	131597189
3	131595689	131598689
3	131597189	131600189
3	131598689	131601689
3	131600189	131603189
3	131601689	131604689
3	131603189	131606189
3	131604689	131607689
3	131645189	131648189
3	131646689	131649689
3	131675189	131678189
3	131676689	131679689
3	131937689	131940689
3	132071189	132074189
3	132072689	132075689
3	132556160	132559160
3	132557660	132560660
3	132559160	132562160
3	132652160	132655160
3	132685160	132688160
3	132686660	132689660
3	134150660	134153660
3	134152160	134155160
3	136856243	136859243
3	136857743	136860743
3	136866743	136869743
3	136872743	136875743
3	137153243	137156243
3	138858586	138861586
3	139700086	139703086
3	142602502	142605502
3	143420002	143423002
3	143675002	143678002
3	143676502	143679502
3	143678002	143681002
3	143681002	143684002
3	143684002	143687002
3	143685502	143688502
3	143687002	143690002
3	144893037	144896037
3	145185537	145188537
3	145229037	145232037
3	145233537	145236537
3	145235037	145238037
3	145236537	145239537
3	145238037	145241037
3	145739037	145742037
3	145740537	145743537
3	145742037	145745037
3	146361537	146364537
3	147414672	147417672
3	147827172	147830172
3	148616172	148619172
3	148622172	148625172
3	149387172	149390172
3	149388672	149391672
3	149397672	149400672
3	149399172	149402172
3	149880672	149883672
3	150651534	150654534
3	151223034	151226034
3	152240034	152243034
3	153494123	153497123
3	153495623	153498623
3	153680123	153683123
3	153729623	153732623
3	153731123	153734123
3	155346623	155349623
3	155354123	155357123
3	161157699	161160699
3	161778699	161781699
3	161780199	161783199
3	161808699	161811699
3	161810199	161813199
3	161811699	161814699
3	161813199	161816199
3	161814699	161817699
3	162236492	162239492
3	162237992	162240992
3	162702992	162705992
3	162711992	162714992
3	162722492	162725492
3	162723992	162726992
3	162725492	162728492
3	162726992	162729992
3	162729992	162732992
3	162731492	162734492
3	162732992	162735992
3	162749492	162752492
3	162750992	162753992
3	162755492	162758492
3	163733492	163736492
3	163743992	163746992
3	164090492	164093492
3	164115992	164118992
3	164118992	164121992
3	164120492	164123492
3	164127992	164130992
3	164129492	164132492
3	164145992	164148992
3	164180492	164183492
3	164181992	164184992
3	164184992	164187992
3	164186492	164189492
3	165456576	165459576
3	165458076	165461076
3	165459576	165462576
3	165960576	165963576
3	165968076	165971076
3	166037076	166040076
3	171014431	171017431
3	171440038	171443038
3	171800038	171803038
3	172221538	172224538
3	172223038	172226038
3	173868538	173871538
3	174357616	174360616
3	174483616	174486616
3	174485116	174488116
3	175004116	175007116
3	175011616	175014616
3	176513116	176516116
3	176597116	176600116
3	176598616	176601616
3	177294542	177297542
3	177296042	177299042
3	177297542	177300542
3	177299042	177302042
3	177306542	177309542
3	178542542	178545542
3	178544042	178547042
3	178565042	178568042
3	178982042	178985042
3	179670542	179673542
3	183177806	183180806
3	183179306	183182306
3	183180806	183183806
3	184125806	184128806
3	184764806	184767806
3	184766306	184769306
3	184767806	184770806
3	185856806	185859806
3	186434163	186437163
3	186435663	186438663
3	186437163	186440163
3	186438663	186441663
3	186440163	186443163
3	189246505	189249505
3	189248005	189251005
3	189533005	189536005
3	189765505	189768505
3	189873505	189876505
3	189875005	189878005
3	190568005	190571005
3	190890505	190893505
3	190976005	190979005
3	190977505	190980505
3	190998505	191001505
3	191177005	191180005
3	191180005	191183005
3	191181505	191184505
3	191186005	191189005
3	192369612	192372612
3	192452112	192455112
3	192590112	192593112
3	194265612	194268612
3	194316612	194319612
3	194318112	194321112
3	194405112	194408112
3	194669112	194672112
3	194828112	194831112
3	196052109	196055109
4	780928	783928
4	782428	785428
4	822928	825928
4	4242134	4245134
4	4243634	4246634
4	4245134	4248134
4	4671134	4674134
4	4672634	4675634
4	4686134	4689134
4	5965634	5968634
4	6732081	6735081
4	7218081	7221081
4	7219581	7222581
4	7317081	7320081
4	7320081	7323081
4	7321581	7324581
4	7401081	7404081
4	7431081	7434081
4	8581581	8584581
4	9192518	9195518
4	9197018	9200018
4	9950018	9953018
4	9951518	9954518
4	9953018	9956018
4	9954518	9957518
4	9956018	9959018
4	9957518	9960518
4	9963518	9966518
4	9965018	9968018
4	10724018	10727018
4	10725518	10728518
4	11634518	11637518
4	12079548	12082548
4	12085548	12088548
4	12226548	12229548
4	14872548	14875548
4	16417590	16420590
4	16419090	16422090
4	16420590	16423590
4	17307090	17310090
4	20851720	20854720
4	21114144	21117144
4	23475144	23478144
4	23593644	23596644
4	23595144	23598144
4	23596644	23599644
4	23601144	23604144
4	23602644	23605644
4	23607144	23610144
4	24670621	24673621
4	25000621	25003621
4	25023121	25026121
4	27780106	27783106
4	27781606	27784606
4	28237606	28240606
4	28242106	28245106
4	28243606	28246606
4	28623106	28626106
4	28918606	28921606
4	28933606	28936606
4	28981606	28984606
4	31335494	31338494
4	31336994	31339994
4	31588994	31591994
4	31590494	31593494
4	31591994	31594994
4	32184494	32187494
4	32199494	32202494
4	32200994	32203994
4	32254994	32257994
4	32656994	32659994
4	32677994	32680994
4	32853494	32856494
4	35349119	35352119
4	35494619	35497619
4	35496119	35499119
4	35505119	35508119
4	35506619	35509619
4	35508119	35511119
4	35509619	35512619
4	35512619	35515619
4	35514119	35517119
4	35515619	35518619
4	35517119	35520119
4	36445539	36448539
4	36447039	36450039
4	36570039	36573039
4	36618039	36621039
4	36621039	36624039
4	36622539	36625539
4	36624039	36627039
4	36625539	36628539
4	36627039	36630039
4	36628539	36631539
4	36630039	36633039
4	37512039	37515039
4	37524039	37527039
4	37560039	37563039
4	37561539	37564539
4	37563039	37566039
4	37800039	37803039
4	37801539	37804539
4	37803039	37806039
4	37954539	37957539
4	38187039	38190039
4	38194539	38197539
4	38196039	38199039
4	38197539	38200539
4	38875539	38878539
4	38878539	38881539
4	38923539	38926539
4	38925039	38928039
4	38991039	38994039
4	38992539	38995539
4	39108044	39111044
4	39109544	39112544
4	39114044	39117044
4	39115544	39118544
4	39117044	39120044
4	39118544	39121544
4	39120044	39123044
4	42609463	42612463
4	42612463	42615463
4	42621463	42624463
4	42738463	42741463
4	42739963	42742963
4	42741463	42744463
4	42750463	42753463
4	42753463	42756463
4	42754963	42757963
4	42756463	42759463
4	44661463	44664463
4	44662963	44665963
4	45069928	45072928
4	45071428	45074428
4	45122428	45125428
4	47547928	47550928
4	47549428	47552428
4	47555428	47558428
4	47624428	47627428
4	48171046	48174046
4	48172546	48175546
4	48174046	48177046
4	48175546	48178546
4	48177046	48180046
4	53130441	53133441
4	54472649	54475649
4	54474149	54477149
4	54475649	54478649
4	55687649	55690649
4	55689149	55692149
4	55716149	55719149
4	56023649	56026649
4	56025149	56028149
4	56305649	56308649
4	56379149	56382149
4	56380649	56383649
4	57127631	57130631
4	57129131	57132131
4	57556631	57559631
4	57916631	57919631
4	57918131	57921131
4	58567631	58570631
4	58569131	58572131
4	58570631	58573631
4	58719131	58722131
4	58720631	58723631
4	58959131	58962131
4	59196131	59199131
4	59355131	59358131
4	59356631	59359631
4	59607131	59610131
4	59608631	59611631
4	59610131	59613131
4	59613131	59616131
4	59628131	59631131
4	59668631	59671631
4	60039156	60042156
4	60057156	60060156
4	60841656	60844656
4	61368156	61371156
4	63235559	63238559
4	64503059	64506059
4	64849559	64852559
4	65508059	65511059
4	65536559	65539559
4	66750075	66753075
4	66751575	66754575
4	66993075	66996075
4	66997575	67000575
4	67300575	67303575
4	69347015	69350015
4	69348515	69351515
4	69350015	69353015
4	69366515	69369515
4	69609515	69612515
4	70340015	70343015
4	70386515	70389515
4	70388015	70391015
4	70389515	70392515
4	70391015	70394015
4	70394015	70397015
4	70395515	70398515
4	70413515	70416515
4	70418015	70421015
4	71126015	71129015
4	71135015	71138015
4	71208515	71211515
4	71210015	71213015
4	71211515	71214515
4	71213015	71216015
4	71214515	71217515
4	71250515	71253515
4	71366015	71369015
4	71382515	71385515
4	71384015	71387015
4	71385515	71388515
4	72471402	72474402
4	73629402	73632402
4	73630902	73633902
4	73639902	73642902
4	74451402	74454402
4	74452902	74455902
4	76194113	76197113
4	76302113	76305113
4	76950113	76953113
4	76951613	76954613
4	76953113	76956113
4	76954613	76957613
4	76962113	76965113
4	76969613	76972613
4	76971113	76974113
4	76972613	76975613
4	77029613	77032613
4	77031113	77034113
4	77037113	77040113
4	77038613	77041613
4	77041613	77044613
4	77043113	77046113
4	77055113	77058113
4	77062613	77065613
4	77065613	77068613
4	77067113	77070113
4	77148113	77151113
4	77194613	77197613
4	77454113	77457113
4	77455613	77458613
4	77467613	77470613
4	77910113	77913113
4	77911613	77914613
4	77913113	77916113
4	77914613	77917613
4	78228199	78231199
4	78232699	78235699
4	78234199	78237199
4	78247699	78250699
4	78249199	78252199
4	78256699	78259699
4	78258199	78261199
4	78264199	78267199
4	78346699	78349699
4	78988699	78991699
4	79384699	79387699
4	79386199	79389199
4	79419199	79422199
4	79420699	79423699
4	79426699	79429699
4	79428199	79431199
4	79429699	79432699
4	79431199	79434199
4	79432699	79435699
4	79437199	79440199
4	79449199	79452199
4	80806699	80809699
4	80808199	80811199
4	82270615	82273615
4	82734115	82737115
4	82858615	82861615
4	82860115	82863115
4	82861615	82864615
4	82866115	82869115
4	83553115	83556115
4	83554615	83557615
4	84237083	84240083
4	84528083	84531083
4	84804083	84807083
4	84825083	84828083
4	84826583	84829583
4	85027583	85030583
4	85467083	85470083
4	86572583	86575583
4	86574083	86577083
4	88386325	88389325
4	88453825	88456825
4	88809325	88812325
4	89853325	89856325
4	89899825	89902825
4	89976325	89979325
4	90165093	90168093
4	90166593	90169593
4	90754593	90757593
4	91714593	91717593
4	91719093	91722093
4	92278593	92281593
4	92280093	92283093
4	92281593	92284593
4	93504078	93507078
4	94803078	94806078
4	95763078	95766078
4	95769078	95772078
4	95770578	95773578
4	95772078	95775078
4	95773578	95776578
4	95952078	95955078
4	96726179	96729179
4	97423679	97426679
4	97425179	97428179
4	97426679	97429679
4	97428179	97431179
4	97429679	97432679
4	97431179	97434179
4	97432679	97435679
4	97434179	97437179
4	98937179	98940179
4	98982179	98985179
4	99015143	99018143
4	99018143	99021143
4	99019643	99022643
4	99022643	99025643
4	99024143	99027143
4	99027143	99030143
4	99028643	99031643
4	99031643	99034643
4	99037643	99040643
4	99039143	99042143
4	99043643	99046643
4	99048143	99051143
4	99054143	99057143
4	99055643	99058643
4	99441143	99444143
4	99465143	99468143
4	99675143	99678143
4	99786143	99789143
4	99787643	99790643
4	100044143	100047143
4	100057643	100060643
4	100059143	100062143
4	100060643	100063643
4	100260143	100263143
4	100261643	100264643
4	100263143	100266143
4	100264643	100267643
4	100266143	100269143
4	100291643	100294643
4	101445143	101448143
4	101446643	101449643
4	101479643	101482643
4	101493143	101496143
4	101497643	101500643
4	101505143	101508143
4	101506643	101509643
4	102475643	102478643
4	102723143	102726143
4	103111643	103114643
4	103153643	103156643
4	103168643	103171643
4	103551143	103554143
4	103552643	103555643
4	103554143	103557143
4	106312597	106315597
4	106908097	106911097
4	109480656	109483656
4	109482156	109485156
4	109942656	109945656
4	109944156	109947156
4	110151156	110154156
4	110152656	110155656
4	112762666	112765666
4	114012073	114015073
4	114018073	114021073
4	114019573	114022573
4	114769573	114772573
4	114784573	114787573
4	115144573	115147573
4	115374073	115377073
4	115375573	115378573
4	115377073	115380073
4	115378573	115381573
4	115411573	115414573
4	115413073	115416073
4	115414573	115417573
4	115431073	115434073
4	115432573	115435573
4	116086573	116089573
4	116172073	116175073
4	116175073	116178073
4	116176573	116179573
4	116362573	116365573
4	116373073	116376073
4	116374573	116377573
4	116376073	116379073
4	116377573	116380573
4	116386573	116389573
4	116388073	116391073
4	116391073	116394073
4	116395573	116398573
4	116407573	116410573
4	116452573	116455573
4	116505073	116508073
4	116506573	116509573
4	116509573	116512573
4	116511073	116514073
4	117886604	117889604
4	118159604	118162604
4	118707104	118710104
4	120007604	120010604
4	120024116	120027116
4	120048116	120051116
4	120235616	120238616
4	120237116	120240116
4	120240116	120243116
4	121396616	121399616
4	121401116	121404116
4	121572116	121575116
4	121575116	121578116
4	121576616	121579616
4	121713116	121716116
4	121714616	121717616
4	122662616	122665616
4	122664116	122667116
4	122883116	122886116
4	123520544	123523544
4	124476044	124479044
4	124477544	124480544
4	127677044	127680044
4	127818044	127821044
4	128137544	128140544
4	129536662	129539662
4	130072162	130075162
4	131050162	131053162
4	131252662	131255662
4	131254162	131257162
4	131255662	131258662
4	131531662	131534662
4	131596162	131599162
4	131845162	131848162
4	132970569	132973569
4	133032069	133035069
4	133111569	133114569
4	133645569	133648569
4	133848069	133851069
4	133849569	133852569
4	133851069	133854069
4	134530569	134533569
4	135774046	135777046
4	136141546	136144546
4	137401546	137404546
4	137403046	137406046
4	137587546	137590546
4	137589046	137592046
4	137739046	137742046
4	137940046	137943046
4	137947546	137950546
4	137950546	137953546
4	137964046	137967046
4	138163562	138166562
4	138165062	138168062
4	138366062	138369062
4	139117562	139120562
4	139119062	139122062
4	139486562	139489562
4	142074113	142077113
4	142665113	142668113
4	143013113	143016113
4	143938613	143941613
4	143940113	143943113
4	143941613	143944613
4	144049655	144052655
4	144051155	144054155
4	144654155	144657155
4	144655655	144658655
4	144657155	144660155
4	144658655	144661655
4	144672155	144675155
4	145197155	145200155
4	145201655	145204655
4	148516573	148519573
4	152604928	152607928
4	152606428	152609428
4	154513650	154516650
4	154519650	154522650
4	154746150	154749150
4	154888650	154891650
4	154893150	154896150
4	155766150	155769150
4	155769150	155772150
4	156099072	156102072
4	156108072	156111072
4	156121572	156124572
4	157363572	157366572
4	157507572	157510572
4	157509072	157512072
4	158877072	158880072
4	159359443	159362443
4	159360943	159363943
4	159362443	159365443
4	159365443	159368443
4	159366943	159369943
4	159368443	159371443
4	159371443	159374443
4	159377443	159380443
4	159381943	159384943
4	160554943	160557943
4	160556443	160559443
4	161471443	161474443
4	162012165	162015165
4	162013665	162016665
4	162015165	162018165
4	162028665	162031665
4	162030165	162033165
4	162031665	162034665
4	162214665	162217665
4	162223665	162226665
4	162225165	162228165
4	162226665	162229665
4	163261665	163264665
4	163263165	163266165
4	163264665	163267665
4	163807665	163810665
4	163809165	163812165
4	164301165	164304165
4	165711051	165714051
4	165712551	165715551
4	165726051	165729051
4	166332051	166335051
4	166333551	166336551
4	166338051	166341051
4	166342551	166345551
[truncated: 4,858 more rows]

## Sheet: SIGNIF_tf0.4_TSI
1	1908088	1911088
1	4596120	4599120
1	4597620	4600620
1	4599120	4602120
1	5307120	5310120
1	10890103	10893103
1	12612103	12615103
1	14370088	14373088
1	14371588	14374588
1	14437588	14440588
1	14452588	14455588
1	14454088	14457088
1	14455588	14458588
1	14457088	14460088
1	14458588	14461588
1	14461588	14464588
1	15364588	15367588
1	15510088	15513088
1	15513088	15516088
1	15574588	15577588
1	15907605	15910605
1	16380105	16383105
1	16426605	16429605
1	16428105	16431105
1	17400105	17403105
1	17401605	17404605
1	17421105	17424105
1	17422605	17425605
1	17461605	17464605
1	17649105	17652105
1	17655105	17658105
1	17716605	17719605
1	17718105	17721105
1	18804105	18807105
1	18828105	18831105
1	18829605	18832605
1	19173124	19176124
1	22359108	22362108
1	22360608	22363608
1	22959108	22962108
1	24198108	24201108
1	24199608	24202608
1	24201108	24204108
1	24207108	24210108
1	25299282	25302282
1	29802214	29805214
1	30369214	30372214
1	30990085	30993085
1	31062085	31065085
1	31074085	31077085
1	31075585	31078585
1	31947085	31950085
1	34038416	34041416
1	35302916	35305916
1	39216337	39219337
1	40153593	40156593
1	40155093	40158093
1	43410163	43413163
1	44563663	44566663
1	46809771	46812771
1	46811271	46814271
1	46812771	46815771
1	46815771	46818771
1	46817271	46820271
1	56154112	56157112
1	56809612	56812612
1	57067612	57070612
1	57069112	57072112
1	59464753	59467753
1	59466253	59469253
1	59467753	59470753
1	62124291	62127291
1	62125791	62128791
1	62494791	62497791
1	62686791	62689791
1	62688291	62691291
1	63412791	63415791
1	64624935	64627935
1	64843935	64846935
1	66126435	66129435
1	66127935	66130935
1	66130935	66133935
1	66132435	66135435
1	66957088	66960088
1	67800088	67803088
1	68871088	68874088
1	70975095	70978095
1	71486595	71489595
1	71488095	71491095
1	72770595	72773595
1	73851108	73854108
1	74337108	74340108
1	76747933	76750933
1	77104933	77107933
1	77106433	77109433
1	77107933	77110933
1	77109433	77112433
1	77110933	77113933
1	79171601	79174601
1	80290601	80293601
1	80512601	80515601
1	80806601	80809601
1	80808101	80811101
1	80809601	80812601
1	81402101	81405101
1	83106170	83109170
1	83107670	83110670
1	83143670	83146670
1	83145170	83148170
1	83161670	83164670
1	83164670	83167670
1	83166170	83169170
1	86457087	86460087
1	86458587	86461587
1	86460087	86463087
1	86479587	86482587
1	86481087	86484087
1	86895087	86898087
1	86896587	86899587
1	86898087	86901087
1	88512150	88515150
1	90822150	90825150
1	93520643	93523643
1	94444650	94447650
1	95146650	95149650
1	95148150	95151150
1	95149650	95152650
1	95164650	95167650
1	97098209	97101209
1	99192209	99195209
1	101655083	101658083
1	101847083	101850083
1	102376583	102379583
1	102378083	102381083
1	102379583	102382583
1	102381083	102384083
1	102436583	102439583
1	103615585	103618585
1	105111085	105114085
1	105235585	105238585
1	105237085	105240085
1	105252085	105255085
1	105498085	105501085
1	105499585	105502585
1	105501085	105504085
1	105505585	105508585
1	105507085	105510085
1	106045068	106048068
1	106046568	106049568
1	106048068	106051068
1	108079068	108082068
1	108085068	108088068
1	108562068	108565068
1	108565068	108568068
1	108566568	108569568
1	108694068	108697068
1	108695568	108698568
1	111393025	111396025
1	111403525	111406525
1	111405025	111408025
1	111574525	111577525
1	111580525	111583525
1	111582025	111585025
1	111583525	111586525
1	111795025	111798025
1	111828025	111831025
1	111829525	111832525
1	112648806	112651806
1	112650306	112653306
1	112651806	112654806
1	112653306	112656306
1	114526806	114529806
1	116286103	116289103
1	118350092	118353092
1	120084092	120087092
1	120085592	120088592
1	120087092	120090092
1	120331592	120334592
1	120333092	120336092
1	120334592	120337592
1	120343592	120346592
1	146767809	146770809
1	152590710	152593710
1	152689710	152692710
1	152691210	152694210
1	152692710	152695710
1	152694210	152697210
1	152970210	152973210
1	152971710	152974710
1	152973210	152976210
1	152980710	152983710
1	153001710	153004710
1	153003210	153006210
1	153042210	153045210
1	153132210	153135210
1	153133710	153136710
1	157131269	157134269
1	157194269	157197269
1	157195769	157198769
1	157203269	157206269
1	157204769	157207769
1	157594769	157597769
1	157596269	157599269
1	157597769	157600769
1	158406269	158409269
1	158490269	158493269
1	158491769	158494769
1	158496269	158499269
1	158497769	158500769
1	158505269	158508269
1	158713769	158716769
1	158715269	158718269
1	160146091	160149091
1	162106591	162109591
1	165643591	165646591
1	166443117	166446117
1	167451117	167454117
1	167524617	167527617
1	167580117	167583117
1	169369593	169372593
1	169512093	169515093
1	169530093	169533093
1	169725093	169728093
1	170824593	170827593
1	170832093	170835093
1	171411093	171414093
1	171799593	171802593
1	171801093	171804093
1	172449091	172452091
1	172450591	172453591
1	175057672	175060672
1	175059172	175062172
1	179407820	179410820
1	179439320	179442320
1	179440820	179443820
1	179449820	179452820
1	179451320	179454320
1	179452820	179455820
1	179454320	179457320
1	182053632	182056632
1	182254632	182257632
1	182260632	182263632
1	182262132	182265132
1	183072132	183075132
1	183085632	183088632
1	183094632	183097632
1	183096132	183099132
1	183154632	183157632
1	183156132	183159132
1	183160632	183163632
1	183264132	183267132
1	183295632	183298632
1	183297132	183300132
1	183579132	183582132
1	183580632	183583632
1	183666132	183669132
1	183669132	183672132
1	183906276	183909276
1	185524776	185527776
1	185526276	185529276
1	185527776	185530776
1	185565276	185568276
1	185566776	185569776
1	185568276	185571276
1	185665776	185668776
1	187753616	187756616
1	188229116	188232116
1	188233616	188236616
1	188239616	188242616
1	188242616	188245616
1	188245616	188248616
1	188247116	188250116
1	188251616	188254616
1	188299616	188302616
1	188319116	188322116
1	188320616	188323616
1	188322116	188325116
1	188323616	188326616
1	188325116	188328116
1	188326616	188329616
1	188328116	188331116
1	188434616	188437616
1	188436116	188439116
1	188761616	188764616
1	188766116	188769116
1	189613616	189616616
1	189618116	189621116
1	189619616	189622616
1	189621116	189624116
1	189642116	189645116
1	189643616	189646616
1	189645116	189648116
1	189990112	189993112
1	189991612	189994612
1	189993112	189996112
1	190002112	190005112
1	190003612	190006612
1	192579112	192582112
1	192580612	192583612
1	193465729	193468729
1	194385229	194388229
1	194386729	194389729
1	194388229	194391229
1	194389729	194392729
1	195042229	195045229
1	195043729	195046729
1	195045229	195048229
1	195049729	195052729
1	195055729	195058729
1	195057229	195060229
1	195058729	195061729
1	195082729	195085729
1	195085729	195088729
1	195087229	195090229
1	195088729	195091729
1	195090229	195093229
1	195091729	195094729
1	195093229	195096229
1	195094729	195097729
1	195799729	195802729
1	195801229	195804229
1	195802729	195805729
1	195804229	195807229
1	195805729	195808729
1	195819229	195822229
1	195820729	195823729
1	195822229	195825229
1	195823729	195826729
1	195825229	195828229
1	195834107	195837107
1	195835607	195838607
1	195913607	195916607
1	195915107	195918107
1	200691126	200694126
1	200692626	200695626
1	201216126	201219126
1	201217626	201220626
1	201688626	201691626
1	201943622	201946622
1	201945122	201948122
1	201952622	201955622
1	204283622	204286622
1	205506145	205509145
1	205507645	205510645
1	205509145	205512145
1	207292645	207295645
1	207294145	207297145
1	208127306	208130306
1	208128806	208131806
1	210005306	210008306
1	210696806	210699806
1	213092153	213095153
1	214638097	214641097
1	214969597	214972597
1	215187097	215190097
1	215188597	215191597
1	215860597	215863597
1	216700597	216703597
1	219627167	219630167
1	219786167	219789167
1	219787667	219790667
1	219957340	219960340
1	219958840	219961840
1	219960340	219963340
1	220134340	220137340
1	220495840	220498840
1	221472340	221475340
1	221820340	221823340
1	223639745	223642745
1	224259245	224262245
1	226635104	226638104
1	227182604	227185604
1	227380604	227383604
1	227478104	227481104
1	227479604	227482604
1	229836173	229839173
1	230236673	230239673
1	230502173	230505173
1	230503673	230506673
1	230505173	230508173
1	231204173	231207173
1	231513173	231516173
1	232137088	232140088
1	233488588	233491588
1	233520088	233523088
1	233521588	233524588
1	233523088	233526088
1	233524588	233527588
1	234124588	234127588
1	234126088	234129088
1	234265588	234268588
1	234585088	234588088
1	234631588	234634588
1	236379132	236382132
1	236383632	236386632
1	236385132	236388132
1	236416632	236419632
1	236476632	236479632
1	236478132	236481132
1	236512632	236515632
1	236518632	236521632
1	236520132	236523132
1	236526132	236529132
1	236527632	236530632
1	236589132	236592132
1	236590632	236593632
1	236667132	236670132
1	236700132	236703132
1	236701632	236704632
1	236706132	236709132
1	236709132	236712132
1	236713632	236716632
1	236716632	236719632
1	236745132	236748132
1	236746632	236749632
1	237613632	237616632
1	237615132	237618132
1	237634632	237637632
1	237684132	237687132
1	237736632	237739632
1	237738132	237741132
1	237739632	237742632
1	237741132	237744132
1	237742632	237745632
1	238416127	238419127
1	238473127	238476127
1	238474627	238477627
1	238717627	238720627
1	238852627	238855627
1	238854127	238857127
1	240172627	240175627
1	240177127	240180127
1	240178627	240181627
1	240180127	240183127
1	240216127	240219127
1	240217627	240220627
1	240219127	240222127
1	240220627	240223627
1	240222127	240225127
1	241456656	241459656
1	241888656	241891656
1	241890156	241893156
1	242017656	242020656
1	242127156	242130156
1	242382156	242385156
1	242839656	242842656
1	244516860	244519860
1	244518360	244521360
1	245446860	245449860
1	246432360	246435360
1	246666360	246669360
1	246708360	246711360
1	246709860	246712860
1	246711360	246714360
1	246712860	246715860
1	246714360	246717360
1	247813756	247816756
1	247815256	247818256
1	247821256	247824256
1	248469256	248472256
1	248470756	248473756
1	248472256	248475256
1	248473756	248476756
1	248475256	248478256
1	248476756	248479756
1	248512756	248515756
1	248514256	248517256
2	611556	614556
2	613056	616056
2	614556	617556
2	616056	619056
2	617556	620556
2	622056	625056
2	650556	653556
2	658056	661056
2	772056	775056
2	850056	853056
2	857556	860556
2	859056	862056
2	860556	863556
2	965556	968556
2	974556	977556
2	1115556	1118556
2	1117056	1120056
2	1118556	1121556
2	1138056	1141056
2	1139556	1142556
2	1141056	1144056
2	1238556	1241556
2	1363056	1366056
2	1364556	1367556
2	1618056	1621056
2	2606556	2609556
2	4859526	4862526
2	4904526	4907526
2	4957026	4960026
2	7630100	7633100
2	10669077	10672077
2	10715577	10718577
2	10717077	10720077
2	10753077	10756077
2	11018577	11021577
2	11606577	11609577
2	12949027	12952027
2	12950527	12953527
2	15040065	15043065
2	15163065	15166065
2	15164565	15167565
2	15175065	15178065
2	15538065	15541065
2	15595065	15598065
2	18260629	18263629
2	18263629	18266629
2	18265129	18268129
2	18277129	18280129
2	18335629	18338629
2	18538129	18541129
2	18589129	18592129
2	18590629	18593629
2	18592129	18595129
2	18593629	18596629
2	18595129	18598129
2	18601129	18604129
2	18602629	18605629
2	18608629	18611629
2	18610129	18613129
2	18679129	18682129
2	18709129	18712129
2	18955129	18958129
2	19792129	19795129
2	19916629	19919629
2	25127818	25130818
2	25129318	25132318
2	29173950	29176950
2	31270130	31273130
2	31271630	31274630
2	33404603	33407603
2	33964103	33967103
2	33967103	33970103
2	33992603	33995603
2	34139603	34142603
2	34184603	34187603
2	34586603	34589603
2	34588103	34591103
2	35869103	35872103
2	35870603	35873603
2	35873603	35876603
2	35875103	35878103
2	35876603	35879603
2	35878103	35881103
2	35879603	35882603
2	35881103	35884103
2	35882603	35885603
2	35884103	35887103
2	35885603	35888603
2	35887103	35890103
2	35932103	35935103
2	35933603	35936603
2	35935103	35938103
2	35936603	35939603
2	37381029	37384029
2	38054529	38057529
2	38056029	38059029
2	38057529	38060529
2	38059029	38062029
2	38060529	38063529
2	38749029	38752029
2	40610804	40613804
2	41936804	41939804
2	41963804	41966804
2	42304024	42307024
2	42335524	42338524
2	42337024	42340024
2	43421524	43424524
2	45211039	45214039
2	45968539	45971539
2	46052539	46055539
2	46054039	46057039
2	46327039	46330039
2	46489039	46492039
2	47065039	47068039
2	47477539	47480539
2	48937028	48940028
2	50224028	50227028
2	50225528	50228528
2	52721523	52724523
2	52931523	52934523
2	57397096	57400096
2	57440596	57443596
2	66076008	66079008
2	66209508	66212508
2	66211008	66214008
2	66212508	66215508
2	67346508	67349508
2	67912008	67915008
2	68027508	68030508
2	68029008	68032008
2	68173008	68176008
2	68569008	68572008
2	68600508	68603508
2	68620008	68623008
2	68900508	68903508
2	70943524	70946524
2	71048524	71051524
2	71050024	71053024
2	71051524	71054524
2	71053024	71056024
2	76349953	76352953
2	76358953	76361953
2	76360453	76363453
2	76363453	76366453
2	76364953	76367953
2	76366453	76369453
2	76370953	76373953
2	76739953	76742953
2	76741453	76744453
2	76742953	76745953
2	77219953	77222953
2	77221453	77224453
2	78377561	78380561
2	79225061	79228061
2	79226561	79229561
2	79228061	79231061
2	79283561	79286561
2	79889561	79892561
2	82027037	82030037
2	82028537	82031537
2	82030037	82033037
2	82031537	82034537
2	82033037	82036037
2	82034537	82037537
2	82186037	82189037
2	85925636	85928636
2	85927136	85930136
2	86128136	86131136
2	98978537	98981537
2	98980037	98983037
2	101078511	101081511
2	101245011	101248011
2	101246511	101249511
2	102052075	102055075
2	102077575	102080575
2	102178075	102181075
2	102821575	102824575
2	102838075	102841075
2	102965575	102968575
2	102967075	102970075
2	102968575	102971575
2	105401508	105404508
2	106126008	106129008
2	106142508	106145508
2	106144008	106147008
2	106382508	106385508
2	106384008	106387008
2	106607508	106610508
2	106615008	106618008
2	106624008	106627008
2	107677008	107680008
2	108071594	108074594
2	108791594	108794594
2	109930094	109933094
2	109931594	109934594
2	111646921	111649921
2	113833921	113836921
2	113874421	113877421
2	114155548	114158548
2	116900548	116903548
2	116902048	116905048
2	116903548	116906548
2	117230545	117233545
2	117587545	117590545
2	117592045	117595045
2	121798074	121801074
2	121799574	121802574
2	123920512	123923512
2	124274512	124277512
2	124928512	124931512
2	125299012	125302012
2	125464012	125467012
2	125465512	125468512
2	125467012	125470012
2	125468512	125471512
2	126388009	126391009
2	129151029	129154029
2	129152529	129155529
2	129158529	129161529
2	130405029	130408029
2	130406529	130409529
2	133158093	133161093
2	133644093	133647093
2	137648518	137651518
2	137963518	137966518
2	137966518	137969518
2	137968018	137971018
2	137978518	137981518
2	137980018	137983018
2	140165771	140168771
2	141857519	141860519
2	142007519	142010519
2	142091519	142094519
2	142093019	142096019
2	142097519	142100519
2	142229519	142232519
2	142231019	142234019
2	142456019	142459019
2	142628519	142631519
2	143959019	143962019
2	149198536	149201536
2	150002536	150005536
2	150604065	150607065
2	150605565	150608565
2	150611565	150614565
2	150617565	150620565
2	150619065	150622065
2	150620565	150623565
2	150622065	150625065
2	150623565	150626565
2	150625065	150628065
2	151834065	151837065
2	155255642	155258642
2	155359142	155362142
2	159059639	159062639
2	159556139	159559139
2	160870139	160873139
2	163687072	163690072
2	163831072	163834072
2	165041547	165044547
2	166904547	166907547
2	166910547	166913547
2	166997547	167000547
2	166999047	167002047
2	167165547	167168547
2	169827637	169830637
2	169829137	169832137
2	170525137	170528137
2	170607637	170610637
2	170630137	170633137
2	170631637	170634637
2	170633137	170636137
2	171148294	171151294
2	171170794	171173794
2	172373794	172376794
2	172375294	172378294
2	172376794	172379794
2	172378294	172381294
2	173161294	173164294
2	174298001	174301001
2	175597001	175600001
2	178676572	178679572
2	182258533	182261533
2	182260033	182263033
2	183109449	183112449
2	183350949	183353949
2	183352449	183355449
2	183376449	183379449
2	183377949	183380949
2	191224017	191227017
2	191225517	191228517
2	191227017	191230017
2	191329017	191332017
2	192163067	192166067
2	192164567	192167567
2	192166067	192169067
2	193730567	193733567
2	193733567	193736567
2	194237567	194240567
2	194366567	194369567
2	194372567	194375567
2	195907053	195910053
2	198125510	198128510
2	199168010	199171010
2	206038086	206041086
2	208973504	208976504
2	211237136	211240136
2	211238636	211241636
2	211852136	211855136
2	211853636	211856636
2	211855136	211858136
2	211856636	211859636
2	211858136	211861136
2	214717077	214720077
2	214718577	214721577
2	214720077	214723077
2	214721577	214724577
2	214724577	214727577
2	214730577	214733577
2	214732077	214735077
2	214733577	214736577
2	214735077	214738077
2	214736577	214739577
2	214754577	214757577
2	214759077	214762077
2	216443597	216446597
2	218710097	218713097
2	218711597	218714597
2	220579036	220582036
2	220835536	220838536
2	220961536	220964536
2	222218615	222221615
2	223106615	223109615
2	226022531	226025531
2	226024031	226027031
2	226025531	226028531
2	226046531	226049531
2	226048031	226051031
2	226049531	226052531
2	226052531	226055531
2	227891531	227894531
2	227921531	227924531
2	228058128	228061128
2	228091128	228094128
2	228092628	228095628
2	228094128	228097128
2	228464628	228467628
2	228466128	228469128
2	228467628	228470628
2	228469128	228472128
2	228578628	228581628
2	228607128	228610128
2	228992628	228995628
2	228994128	228997128
2	229909128	229912128
2	230459628	230462628
2	230918628	230921628
2	230960628	230963628
2	230995128	230998128
2	230996628	230999628
2	231029596	231032596
2	231241096	231244096
2	231242596	231245596
2	231244096	231247096
2	231257596	231260596
2	231421096	231424096
2	231427096	231430096
2	231428596	231431596
2	231430096	231433096
2	231437596	231440596
2	231877096	231880096
2	231878596	231881596
2	232388596	232391596
2	233426596	233429596
2	233428096	233431096
2	233960596	233963596
2	234059233	234062233
2	234060733	234063733
2	234066733	234069733
2	234765733	234768733
2	234767233	234770233
2	234768733	234771733
2	235214233	235217233
2	235506733	235509733
2	235508233	235511233
2	235509733	235512733
2	235598233	235601233
2	236069233	236072233
2	238210278	238213278
2	238211778	238214778
2	238213278	238216278
2	238535778	238538778
2	239489778	239492778
2	239564778	239567778
2	241018012	241021012
2	241019512	241022512
2	241115512	241118512
2	241118512	241121512
2	241120012	241123012
2	241340512	241343512
2	241829512	241832512
2	241834012	241837012
3	296178	299178
3	890178	893178
3	891678	894678
3	1514178	1517178
3	1848678	1851678
3	2435178	2438178
3	2955678	2958678
3	2957178	2960178
3	2960178	2963178
3	3968065	3971065
3	3971065	3974065
3	3981565	3984565
3	3983065	3986065
3	3987565	3990565
3	4013065	4016065
3	4377565	4380565
3	4730065	4733065
3	5714065	5717065
3	5789065	5792065
3	5954065	5957065
3	5955565	5958565
3	7128513	7131513
3	7130013	7133013
3	7370013	7373013
3	7620513	7623513
3	7910013	7913013
3	7911513	7914513
3	7922013	7925013
3	7923513	7926513
3	7925013	7928013
3	7926513	7929513
3	7938513	7941513
3	7940013	7943013
3	7944513	7947513
3	7949013	7952013
3	7974513	7977513
3	7982013	7985013
3	7983513	7986513
3	7985013	7988013
3	8177013	8180013
3	8619513	8622513
3	11034711	11037711
3	12486508	12489508
3	13109008	13112008
3	13110508	13113508
3	13130008	13133008
3	13193008	13196008
3	14291008	14294008
3	14328508	14331508
3	16007010	16010010
3	16184010	16187010
3	16185510	16188510
3	16367010	16370010
3	18813570	18816570
3	20505570	20508570
3	20507070	20510070
3	20511570	20514570
3	20513070	20516070
3	20574570	20577570
3	21485214	21488214
3	21492714	21495714
3	21957714	21960714
3	21959214	21962214
3	21960714	21963714
3	21963714	21966714
3	21998214	22001214
3	22001214	22004214
3	22049214	22052214
3	22560714	22563714
3	22721214	22724214
3	23973714	23976714
3	23975214	23978214
3	24794043	24797043
3	25172043	25175043
3	26502543	26505543
3	26504043	26507043
3	27095043	27098043
3	27251041	27254041
3	28151041	28154041
3	29406541	29409541
3	29789041	29792041
3	30135536	30138536
3	30249536	30252536
3	30902036	30905036
3	30903536	30906536
3	31776536	31779536
3	32156036	32159036
3	32661536	32664536
3	32663036	32666036
3	32664536	32667536
3	34712029	34715029
3	34713529	34716529
3	36150553	36153553
3	36152053	36155053
3	36153553	36156553
3	36170053	36173053
3	36209053	36212053
3	36212053	36215053
3	36213553	36216553
3	39446011	39449011
3	39531511	39534511
3	39533011	39536011
3	39539011	39542011
3	39951511	39954511
3	39953011	39956011
3	39954511	39957511
3	39971011	39974011
3	40095511	40098511
3	40103011	40106011
3	40104511	40107511
3	40106011	40109011
3	41049511	41052511
3	41475511	41478511
3	41585011	41588011
3	41586511	41589511
3	41588011	41591011
3	41594011	41597011
3	41595511	41598511
3	41597011	41600011
3	41598511	41601511
3	41864011	41867011
3	42365087	42368087
3	42366587	42369587
3	42368087	42371087
3	42369587	42372587
3	42371087	42374087
3	42372587	42375587
3	45221019	45224019
3	54605050	54608050
3	58371529	58374529
3	59475529	59478529
3	60102522	60105522
3	60105522	60108522
3	60110022	60113022
3	60807522	60810522
3	61047522	61050522
3	61049022	61052022
3	61050522	61053522
3	61052022	61055022
3	62712522	62715522
3	62723022	62726022
3	63272062	63275062
3	63518062	63521062
3	67655062	67658062
3	67656562	67659562
3	67658062	67661062
3	67659562	67662562
3	69410369	69413369
3	69552869	69555869
3	69581369	69584369
3	69879869	69882869
3	70346369	70349369
3	70347869	70350869
3	73343063	73346063
3	73365563	73368563
3	73367063	73370063
3	73368563	73371563
3	73713563	73716563
3	73715063	73718063
3	73781063	73784063
3	74064563	74067563
3	74066063	74069063
3	74772563	74775563
3	74774063	74777063
3	74783063	74786063
3	75599072	75602072
3	75600572	75603572
3	75602072	75605072
3	75603572	75606572
3	75605072	75608072
3	76115072	76118072
3	76116572	76119572
3	76118072	76121072
3	76985072	76988072
3	76986572	76989572
3	77241572	77244572
3	77601572	77604572
3	77603072	77606072
3	79958044	79961044
3	82540569	82543569
3	82977069	82980069
3	84507918	84510918
3	84509418	84512418
3	84510918	84513918
3	85584918	85587918
3	85587918	85590918
3	85592418	85595418
3	85593918	85596918
3	85595418	85598418
3	85596918	85599918
3	85598418	85601418
3	85608918	85611918
3	85610418	85613418
3	86525418	86528418
3	86526918	86529918
3	86528418	86531418
3	86529918	86532918
3	86531418	86534418
3	86750418	86753418
3	86751918	86754918
3	87344059	87347059
3	87345559	87348559
3	87347059	87350059
3	94204955	94207955
3	94206455	94209455
3	95149955	95152955
3	95151455	95154455
3	95158955	95161955
3	95163455	95166455
3	95164955	95167955
3	95167955	95170955
3	95169455	95172455
3	95170955	95173955
3	95173955	95176955
3	95178455	95181455
3	95667455	95670455
3	97788565	97791565
3	97790065	97793065
3	97793065	97796065
3	97799065	97802065
3	97838065	97841065
3	97839565	97842565
3	97890565	97893565
3	97898065	97901065
3	97904065	97907065
3	97905565	97908565
3	97907065	97910065
3	97920565	97923565
3	97934065	97937065
3	97935565	97938565
3	97937065	97940065
3	97938565	97941565
3	97940065	97943065
3	97983565	97986565
3	98726065	98729065
3	98727565	98730565
3	98729065	98732065
3	98733565	98736565
3	98735065	98738065
3	98736565	98739565
3	98738065	98741065
3	98742565	98745565
3	98744065	98747065
3	98745565	98748565
3	98747065	98750065
3	98751565	98754565
3	98753065	98756065
3	98759065	98762065
3	98760565	98763565
3	98763565	98766565
3	100809504	100812504
3	100811004	100814004
3	101976504	101979504
3	101981004	101984004
3	101982504	101985504
3	102807665	102810665
3	102809165	102812165
3	102813665	102816665
3	102815165	102818165
3	102816665	102819665
3	102818165	102821165
3	102819665	102822665
3	103350665	103353665
3	103352165	103355165
3	103451165	103454165
3	103464665	103467665
3	103466165	103469165
3	103467665	103470665
3	103818665	103821665
3	103937165	103940165
3	103940165	103943165
3	104237165	104240165
3	104412665	104415665
3	104415665	104418665
3	104417165	104420165
3	104418665	104421665
3	104804165	104807165
3	105694583	105697583
3	105696083	105699083
3	106033583	106036583
3	107701583	107704583
3	108063083	108066083
3	108876609	108879609
3	109218609	109221609
3	109646109	109649109
3	109647609	109650609
3	109649109	109652109
3	109650609	109653609
3	109652109	109655109
3	109653609	109656609
3	109655109	109658109
3	109719609	109722609
3	109722609	109725609
3	110996109	110999109
3	111035109	111038109
3	111036609	111039609
3	111038109	111041109
3	111039609	111042609
3	111738692	111741692
3	111740192	111743192
3	111741692	111744692
3	111743192	111746192
3	111923192	111926192
3	111926192	111929192
3	111927692	111930692
3	111948692	111951692
3	111956192	111959192
3	111957692	111960692
3	111971192	111974192
3	111974192	111977192
3	111990692	111993692
3	112844192	112847192
3	112845692	112848692
3	115109090	115112090
3	116322590	116325590
3	121503123	121506123
3	121639623	121642623
3	121641123	121644123
3	121642623	121645623
3	122299623	122302623
3	123097623	123100623
3	123101070	123104070
3	123102570	123105570
3	123104070	123107070
3	123105570	123108570
3	124298070	124301070
3	124299570	124302570
3	124304070	124307070
3	124305570	124308570
3	124307070	124310070
3	124317570	124320570
3	124322070	124325070
3	124338570	124341570
3	124340070	124343070
3	124377570	124380570
3	124691070	124694070
3	124692570	124695570
3	125678070	125681070
3	125844570	125847570
3	125846070	125849070
3	125847570	125850570
3	125849070	125852070
3	125856570	125859570
3	125858070	125861070
3	125943570	125946570
3	125945070	125948070
3	125946570	125949570
3	125948070	125951070
3	125949570	125952570
3	125951070	125954070
3	125952570	125955570
3	126020070	126023070
3	129062020	129065020
3	129063520	129066520
3	131384189	131387189
3	131385689	131388689
3	131594189	131597189
3	131595689	131598689
3	131597189	131600189
3	131598689	131601689
3	131600189	131603189
3	131601689	131604689
3	131604689	131607689
3	131645189	131648189
3	131646689	131649689
3	131673689	131676689
3	131675189	131678189
3	131676689	131679689
3	131936189	131939189
3	131937689	131940689
3	132071189	132074189
3	132072689	132075689
3	132074189	132077189
3	132505160	132508160
3	132509660	132512660
3	132556160	132559160
3	132557660	132560660
3	132559160	132562160
3	132652160	132655160
3	132685160	132688160
3	133409660	133412660
3	134150660	134153660
3	134153660	134156660
3	136856243	136859243
3	136857743	136860743
3	137075243	137078243
3	137147243	137150243
3	139698586	139701586
3	139700086	139703086
3	140907586	140910586
3	140909086	140912086
3	143420002	143423002
3	143675002	143678002
3	143676502	143679502
3	143678002	143681002
3	143679502	143682502
3	143681002	143684002
3	143684002	143687002
3	143685502	143688502
3	143687002	143690002
3	145053537	145056537
3	145233537	145236537
3	145235037	145238037
3	145236537	145239537
3	145238037	145241037
3	145239537	145242537
3	145739037	145742037
3	145740537	145743537
3	145742037	145745037
3	145743537	145746537
3	146256537	146259537
3	146301537	146304537
3	146303037	146306037
3	146361537	146364537
3	147414672	147417672
3	147827172	147830172
3	148614672	148617672
3	148619172	148622172
3	148620672	148623672
3	148622172	148625172
3	149397672	149400672
3	149880672	149883672
3	152610534	152613534
3	153494123	153497123
3	153495623	153498623
3	153683123	153686123
3	153725123	153728123
3	153726623	153729623
3	153728123	153731123
3	153729623	153732623
3	153731123	153734123
3	155333123	155336123
3	155346623	155349623
3	155348123	155351123
3	155352623	155355623
3	155417123	155420123
3	161781699	161784699
3	161808699	161811699
3	161810199	161813199
3	161811699	161814699
3	161813199	161816199
3	161814699	161817699
3	162135992	162138992
3	162236492	162239492
3	162237992	162240992
3	162710492	162713492
3	162711992	162714992
3	162713492	162716492
3	162722492	162725492
3	162723992	162726992
3	162725492	162728492
3	162726992	162729992
3	162729992	162732992
3	162731492	162734492
3	162732992	162735992
3	162755492	162758492
3	163731992	163734992
3	163743992	163746992
3	164090492	164093492
3	164180492	164183492
3	164181992	164184992
3	164184992	164187992
3	165456576	165459576
3	165840576	165843576
3	165842076	165845076
3	165846576	165849576
3	165849576	165852576
3	165851076	165854076
3	165852576	165855576
3	165855576	165858576
3	165858576	165861576
3	165962076	165965076
3	165968076	165971076
3	166037076	166040076
3	169221931	169224931
3	171014431	171017431
3	171798538	171801538
3	171800038	171803038
3	172221538	172224538
3	172223038	172226038
3	173868538	173871538
3	174357616	174360616
3	175004116	175007116
3	176597116	176600116
3	176598616	176601616
3	177296042	177299042
3	177297542	177300542
3	177299042	177302042
3	177306542	177309542
3	178542542	178545542
3	178544042	178547042
3	178565042	178568042
3	179670542	179673542
3	183179306	183182306
3	183180806	183183806
3	183362306	183365306
3	183378806	183381806
3	184125806	184128806
3	184127306	184130306
3	184764806	184767806
3	184766306	184769306
3	184767806	184770806
3	186434163	186437163
3	186435663	186438663
3	186437163	186440163
3	186438663	186441663
3	187565163	187568163
3	187751163	187754163
3	189248005	189251005
3	189533005	189536005
3	189854005	189857005
3	189873505	189876505
3	189875005	189878005
3	189879505	189882505
3	189882505	189885505
3	189884005	189887005
3	190514005	190517005
3	190775005	190778005
3	190892005	190895005
3	190976005	190979005
3	190977505	190980505
3	191177005	191180005
3	191180005	191183005
3	191181505	191184505
3	191186005	191189005
3	192371112	192374112
3	192450612	192453612
3	192452112	192455112
3	192591612	192594612
3	193571112	193574112
3	194066112	194069112
3	194265612	194268612
3	194316612	194319612
3	194669112	194672112
3	194868612	194871612
4	780928	783928
4	782428	785428
4	822928	825928
4	2369428	2372428
4	2375428	2378428
4	4242134	4245134
4	4243634	4246634
4	4245134	4248134
4	4284134	4287134
4	4671134	4674134
4	4672634	4675634
4	4674134	4677134
4	4687634	4690634
4	5967134	5970134
4	7215081	7218081
4	7317081	7320081
4	7320081	7323081
4	7429581	7432581
4	8581581	8584581
4	9951518	9954518
4	9953018	9956018
4	9954518	9957518
4	9956018	9959018
4	9957518	9960518
4	9959018	9962018
4	9963518	9966518
4	9965018	9968018
4	10725518	10728518
4	12085548	12088548
4	12238548	12241548
4	16417590	16420590
4	16419090	16422090
4	17307090	17310090
4	18748720	18751720
4	18750220	18753220
4	20851720	20854720
4	21475644	21478644
4	23589144	23592144
4	23595144	23598144
4	23601144	23604144
4	23602644	23605644
4	23607144	23610144
4	24670621	24673621
4	25000621	25003621
4	27781606	27784606
4	28038106	28041106
4	28242106	28245106
4	28243606	28246606
4	28737106	28740106
4	28935106	28938106
4	28981606	28984606
4	31335494	31338494
4	31336994	31339994
4	31588994	31591994
4	31590494	31593494
4	32196494	32199494
4	32199494	32202494
4	32200994	32203994
4	32251994	32254994
4	32253494	32256494
4	32254994	32257994
4	32574494	32577494
4	32677994	32680994
4	33288119	33291119
4	35349119	35352119
4	35352119	35355119
4	35493119	35496119
4	35494619	35497619
4	35496119	35499119
4	35505119	35508119
4	35506619	35509619
4	35508119	35511119
4	35509619	35512619
4	35512619	35515619
4	35514119	35517119
4	35515619	35518619
4	35517119	35520119
4	35518619	35521619
4	35695619	35698619
4	36441039	36444039
4	36444039	36447039
4	36445539	36448539
4	36447039	36450039
4	36618039	36621039
4	36624039	36627039
4	36625539	36628539
4	36627039	36630039
4	36628539	36631539
4	36630039	36633039
4	36631539	36634539
4	36997539	37000539
4	37078539	37081539
4	37080039	37083039
4	37083039	37086039
4	37159539	37162539
4	37510539	37513539
4	37512039	37515039
4	37525539	37528539
4	37560039	37563039
4	37561539	37564539
4	37563039	37566039
4	37786539	37789539
4	37800039	37803039
4	37801539	37804539
4	37803039	37806039
4	38187039	38190039
4	38194539	38197539
4	38196039	38199039
4	38590539	38593539
4	38878539	38881539
4	38910039	38913039
4	38923539	38926539
4	38991039	38994039
4	38992539	38995539
4	39108044	39111044
4	39109544	39112544
4	39115544	39118544
4	39117044	39120044
4	39118544	39121544
4	39120044	39123044
4	41322044	41325044
4	42432463	42435463
4	42609463	42612463
4	42610963	42613963
4	42612463	42615463
4	42618463	42621463
4	42621463	42624463
4	42738463	42741463
4	42739963	42742963
4	42741463	42744463
4	42759463	42762463
4	44661463	44664463
4	44662963	44665963
4	48171046	48174046
4	48172546	48175546
4	48174046	48177046
4	48175546	48178546
4	48177046	48180046
4	48178546	48181546
4	53130441	53133441
4	54472649	54475649
4	54474149	54477149
4	55687649	55690649
4	55689149	55692149
4	56023649	56026649
4	56025149	56028149
4	56316149	56319149
4	56320649	56323649
4	56379149	56382149
4	56380649	56383649
4	57127631	57130631
4	57129131	57132131
4	57916631	57919631
4	57918131	57921131
4	58030631	58033631
4	58567631	58570631
4	58569131	58572131
4	58570631	58573631
4	58719131	58722131
4	58720631	58723631
4	58960631	58963631
4	58977131	58980131
4	59355131	59358131
4	59607131	59610131
4	59608631	59611631
4	59610131	59613131
4	59628131	59631131
4	59629631	59632631
4	60055656	60058656
4	60057156	60060156
4	60058656	60061656
4	60841656	60844656
4	61368156	61371156
4	63429059	63432059
4	64503059	64506059
4	64849559	64852559
4	65262059	65265059
4	65538059	65541059
4	65817059	65820059
4	66718575	66721575
4	66750075	66753075
4	66751575	66754575
4	66753075	66756075
4	66756075	66759075
4	66994575	66997575
4	69347015	69350015
4	69348515	69351515
4	69350015	69353015
4	70386515	70389515
4	70388015	70391015
4	70389515	70392515
4	70391015	70394015
4	70392515	70395515
4	70394015	70397015
4	70395515	70398515
4	70413515	70416515
4	70418015	70421015
4	70419515	70422515
4	70455515	70458515
4	70487015	70490015
4	71114015	71117015
4	71127515	71130515
4	71204015	71207015
4	71208515	71211515
4	71210015	71213015
4	71211515	71214515
4	71213015	71216015
4	71214515	71217515
4	71249015	71252015
4	71250515	71253515
4	71366015	71369015
4	71367515	71370515
4	71379515	71382515
4	71384015	71387015
4	71417015	71420015
4	72471402	72474402
4	73627902	73630902
4	73629402	73632402
4	73630902	73633902
4	73638402	73641402
4	73758402	73761402
4	74446902	74449902
4	74448402	74451402
4	74449902	74452902
4	74451402	74454402
4	74452902	74455902
4	75421613	75424613
4	76300613	76303613
4	76302113	76305113
4	76623113	76626113
4	76846613	76849613
4	76854113	76857113
4	76855613	76858613
4	76857113	76860113
4	76951613	76954613
4	76953113	76956113
4	76954613	76957613
4	76960613	76963613
4	76962113	76965113
4	76971113	76974113
4	76972613	76975613
4	77029613	77032613
4	77062613	77065613
4	77148113	77151113
4	77193113	77196113
4	77454113	77457113
4	77455613	77458613
4	77467613	77470613
4	77913113	77916113
4	77914613	77917613
4	78346699	78349699
4	78988699	78991699
4	78990199	78993199
4	79384699	79387699
4	79386199	79389199
4	79419199	79422199
4	79420699	79423699
4	79428199	79431199
4	79429699	79432699
4	79443199	79446199
4	79449199	79452199
4	79453699	79456699
4	80470699	80473699
4	80614699	80617699
4	80806699	80809699
4	80808199	80811199
4	82732615	82735615
4	82857115	82860115
4	82858615	82861615
4	82860115	82863115
4	82864615	82867615
4	82866115	82869115
4	83553115	83556115
4	83554615	83557615
4	84142583	84145583
4	84237083	84240083
4	84238583	84241583
4	84789083	84792083
4	84826583	84829583
4	84943583	84946583
4	85024583	85027583
4	86274083	86277083
4	86571083	86574083
4	86572583	86575583
4	87253825	87256825
4	88144825	88147825
4	88453825	88456825
4	88783825	88786825
4	88791325	88794325
4	88792825	88795825
4	89899825	89902825
4	90165093	90168093
4	90166593	90169593
4	90748593	90751593
4	90753093	90756093
4	91714593	91717593
4	92278593	92281593
4	92280093	92283093
4	93504078	93507078
4	94803078	94806078
4	95761578	95764578
4	95766078	95769078
4	95769078	95772078
4	95770578	95773578
4	95772078	95775078
4	95773578	95776578
4	95776578	95779578
4	96726179	96729179
4	97423679	97426679
4	97425179	97428179
4	97426679	97429679
4	97428179	97431179
4	97429679	97432679
4	97431179	97434179
4	97432679	97435679
4	97434179	97437179
4	98950679	98953679
4	99013643	99016643
4	99015143	99018143
4	99019643	99022643
4	99024143	99027143
4	99025643	99028643
4	99028643	99031643
4	99037643	99040643
4	99039143	99042143
4	99043643	99046643
4	99048143	99051143
4	99054143	99057143
4	99055643	99058643
4	99064643	99067643
4	99465143	99468143
4	99787643	99790643
4	100042643	100045643
4	100057643	100060643
4	100059143	100062143
4	100060643	100063643
4	100261643	100264643
4	100263143	100266143
4	100264643	100267643
4	101106143	101109143
4	101124143	101127143
4	101445143	101448143
4	101446643	101449643
4	101479643	101482643
4	101493143	101496143
4	101497643	101500643
4	101503643	101506643
4	101505143	101508143
4	101506643	101509643
4	102474143	102477143
4	102477143	102480143
4	102723143	102726143
4	103111643	103114643
4	103282643	103285643
4	103551143	103554143
4	103552643	103555643
4	103554143	103557143
4	106311097	106314097
4	106908097	106911097
4	109482156	109485156
4	109942656	109945656
4	109944156	109947156
4	109969656	109972656
4	110152656	110155656
4	112762666	112765666
4	112764166	112767166
4	114012073	114015073
4	114018073	114021073
4	114019573	114022573
4	114021073	114024073
4	114027073	114030073
4	115144573	115147573
4	115374073	115377073
4	115375573	115378573
4	115377073	115380073
4	115378573	115381573
4	115411573	115414573
4	115413073	115416073
4	115414573	115417573
4	115416073	115419073
4	115431073	115434073
4	116085073	116088073
4	116170573	116173573
4	116172073	116175073
4	116176573	116179573
4	116377573	116380573
4	116389573	116392573
4	116391073	116394073
4	116394073	116397073
4	116395573	116398573
4	116406073	116409073
4	116449573	116452573
4	116509573	116512573
4	116511073	116514073
4	116916073	116919073
4	118651604	118654604
4	118707104	118710104
4	120024116	120027116
4	120048116	120051116
4	120067616	120070616
4	120069116	120072116
4	120234116	120237116
4	120237116	120240116
4	120238616	120241616
4	121401116	121404116
4	121402616	121405616
4	121516616	121519616
4	121572116	121575116
4	121576616	121579616
4	121714616	121717616
4	122281616	122284616
4	122662616	122665616
4	122664116	122667116
4	127059044	127062044
4	127063544	127066544
4	127065044	127068044
4	127818044	127821044
4	127819544	127822544
4	128137544	128140544
4	131050162	131053162
4	131252662	131255662
4	131254162	131257162
4	131845162	131848162
4	131846662	131849662
4	132970569	132973569
4	133032069	133035069
4	133111569	133114569
4	133849569	133852569
4	133851069	133854069
4	134533569	134536569
4	135885046	135888046
4	135898546	135901546
4	136123546	136126546
4	136680046	136683046
4	136681546	136684546
4	136683046	136686046
4	137401546	137404546
4	137403046	137406046
4	137503546	137506546
4	137941546	137944546
4	137949046	137952046
4	137950546	137953546
4	138162062	138165062
4	138163562	138166562
4	139117562	139120562
4	139119062	139122062
4	139486562	139489562
4	141916613	141919613
4	141918113	141921113
4	141919613	141922613
4	142663613	142666613
4	142665113	142668113
4	143013113	143016113
4	144049655	144052655
4	144051155	144054155
4	144654155	144657155
4	144655655	144658655
4	144657155	144660155
4	144658655	144661655
4	144672155	144675155
4	144673655	144676655
4	145195655	145198655
4	145197155	145200155
4	148516573	148519573
4	152604928	152607928
4	154513650	154516650
4	154893150	154896150
4	154894650	154897650
4	155359650	155362650
4	155406150	155409150
4	155410650	155413650
4	155766150	155769150
4	156099072	156102072
4	156100572	156103572
4	156108072	156111072
4	157507572	157510572
4	157509072	157512072
4	159348943	159351943
4	159350443	159353443
4	159360943	159363943
4	159362443	159365443
4	159365443	159368443
4	159366943	159369943
4	159369943	159372943
4	159371443	159374443
4	159375943	159378943
4	159377443	159380443
4	159381943	159384943
4	159411943	159414943
4	160380943	160383943
4	160556443	160559443
4	161472943	161475943
4	162010665	162013665
4	162012165	162015165
4	162013665	162016665
4	162015165	162018165
4	162022665	162025665
4	162198165	162201165
4	162223665	162226665
4	162225165	162228165
4	163263165	163266165
4	163264665	163267665
4	163716165	163719165
4	163807665	163810665
4	163809165	163812165
4	165711051	165714051
4	165727551	165730551
4	166336551	166339551
4	166338051	166341051
4	166339551	166342551
4	166342551	166345551
4	166344051	166347051
4	166345551	166348551
4	166347051	166350051
4	166348551	166351551
4	166350051	166353051
4	168535589	168538589
4	169438589	169441589
4	175024542	175027542
4	175656042	175659042
4	175774542	175777542
4	175776042	175779042
4	175810542	175813542
4	176994042	176997042
4	177228092	177231092
4	177232592	177235592
4	177262592	177265592
4	178960592	178963592
4	179020592	179023592
4	179022092	179025092
4	179518592	179521592
4	180067628	180070628
4	180069128	180072128
4	180409628	180412628
4	180411128	180414128
4	180502628	180505628
4	180504128	180507128
4	180900128	180903128
4	181437128	181440128
4	181438628	181441628
4	181468628	181471628
4	181470128	181473128
4	181471628	181474628
4	182278628	182281628
4	183246059	183249059
4	183807059	183810059
4	183808559	183811559
4	184291559	184294559
4	184293059	184296059
4	185646059	185649059
4	185748059	185751059
4	185776559	185779559
4	185907059	185910059
4	185908559	185911559
4	185910059	185913059
4	187099611	187102611
4	187369611	187372611
4	187371111	187374111
4	188208111	188211111
4	188928111	188931111
4	189240453	189243453
4	189241953	189244953
4	189243453	189246453
4	189247953	189250953
4	189249453	189252453
4	189295953	189298953
4	189582453	189585453
4	189583953	189586953
4	189589953	189592953
4	189591453	189594453
4	189849453	189852453
4	189852453	189855453
4	189856953	189859953
4	190294953	190297953
4	190297953	190300953
4	190299453	190302453
4	190300953	190303953
4	190311453	190314453
5	2317566	2320566
5	2335566	2338566
5	2940066	2943066
5	4022969	4025969
5	5090969	5093969
5	5140469	5143469
5	5299469	5302469
5	5300969	5303969
5	5417969	5420969
5	6209881	6212881
5	6211381	6214381
5	6217381	6220381
5	7561381	7564381
5	7925881	7928881
5	8000881	8003881
5	8014381	8017381
5	8015881	8018881
5	8017381	8020381
[truncated: 4,661 more rows]

[truncated: 16 more sheets: SIGNIF_tf0.3_LWK, SIGNIF_tf0.3_YRI, SIGNIF_tf0.3_GBR, SIGNIF_tf0.3_TSI, OUTLIERS_tf0.5_LWK, OUTLIERS_tf0.5_YRI, OUTLIERS_tf0.5_GBR, OUTLIERS_tf0.5_TSI, OUTLIERS_tf0.4_LWK, OUTLIERS_tf0.4_YRI, OUTLIERS_tf0.4_GBR, OUTLIERS_tf0.4_TSI, OUTLIERS_tf0..3_LWK, OUTLIERS_tf0.3_YRI, OUTLIERS_tf0.3_GBR, OUTLIERS_tf0.3_TSI]
